# Supplementary material
Source: publisher figshare collection journal article supplement (https://karger.figshare.com/articles/dataset/_/25656384)
Supplement: Supplementary file 1 [file 1]

**Supplementary Table 1 5542 DEmRNAs were obtained by differential analysis of LUAD mRNA expression data**

| logFC | logCPM | PValue | FDR |  |
| --- | --- | --- | --- | --- |
| RTKN2 | -4.03616 | 5.604246 | 3.76E-219 | 6.78E-215 |
| STX11 | -3.0321 | 4.249013 | 1.44E-215 | 1.30E-211 |
| FAM107A | -4.51453 | 5.311908 | 2.22E-213 | 1.33E-209 |
| OTUD1 | -2.08517 | 4.703329 | 6.61E-210 | 2.98E-206 |
| EPAS1 | -2.67896 | 9.319962 | 4.37E-207 | 1.58E-203 |
| S1PR1 | -2.82213 | 5.371791 | 1.99E-199 | 5.99E-196 |
| SEMA3G | -3.18964 | 4.062015 | 2.71E-198 | 6.98E-195 |
| TEK | -3.22366 | 4.471294 | 3.15E-198 | 7.10E-195 |
| RGCC | -2.84733 | 6.302046 | 6.64E-195 | 1.33E-191 |
| PECAM1 | -2.28643 | 8.124802 | 5.59E-192 | 1.01E-188 |
| RAMP3 | -3.19429 | 4.69428 | 8.28E-192 | 1.36E-188 |
| ACVRL1 | -2.53773 | 5.703225 | 3.21E-189 | 4.83E-186 |
| SPAAR | -2.68319 | 0.659324 | 5.15E-189 | 7.14E-186 |
| EMP2 | -2.69581 | 8.415496 | 3.03E-185 | 3.91E-182 |
| EDNRB | -3.46461 | 5.154678 | 2.89E-180 | 3.47E-177 |
| SLC6A4 | -6.13027 | 4.667733 | 2.35E-177 | 2.65E-174 |
| FCN3 | -4.49217 | 5.120504 | 5.16E-177 | 5.48E-174 |
| PALM2AKAP2 | -2.4837 | 7.16692 | 2.88E-175 | 2.88E-172 |
| PRX | -3.31443 | 4.716167 | 1.40E-174 | 1.33E-171 |
| PTPN21 | -2.41263 | 4.772622 | 6.91E-174 | 6.23E-171 |
| HSPA12B | -2.7603 | 3.332658 | 3.04E-172 | 2.61E-169 |
| RAMP2 | -2.83386 | 4.427855 | 4.34E-172 | 3.56E-169 |
| LDB2 | -2.55977 | 4.531554 | 1.88E-167 | 1.47E-164 |
| ROBO4 | -2.8174 | 4.901419 | 4.28E-164 | 3.22E-161 |
| LIMS2 | -2.77619 | 4.825224 | 7.71E-162 | 5.57E-159 |
| ANGPT4 | -4.19155 | 0.376642 | 1.56E-159 | 1.08E-156 |
| WWC2 | -2.32255 | 5.561318 | 1.57E-158 | 1.05E-155 |
| AGER | -5.00579 | 8.355442 | 1.22E-157 | 7.85E-155 |
| FABP4 | -4.87542 | 4.472234 | 1.63E-157 | 1.01E-154 |
| SPOCK2 | -3.16885 | 7.204304 | 1.06E-156 | 6.37E-154 |
| CDH5 | -2.52316 | 6.193309 | 6.44E-156 | 3.75E-153 |
| JAM2 | -2.4786 | 4.068946 | 9.82E-153 | 5.53E-150 |
| MYZAP | -3.26552 | 1.619519 | 3.80E-150 | 2.08E-147 |
| CAVIN2 | -3.27303 | 6.2071 | 7.14E-150 | 3.79E-147 |
| FHL1 | -3.39014 | 6.173186 | 9.38E-150 | 4.83E-147 |
| KANK3 | -2.8259 | 2.68468 | 1.03E-149 | 5.14E-147 |
| CALCRL | -2.71232 | 5.848069 | 2.37E-149 | 1.15E-146 |
| CLEC3B | -3.73664 | 3.384059 | 4.98E-147 | 2.36E-144 |
| FMO2 | -3.23953 | 5.871349 | 1.84E-145 | 8.49E-143 |
| FOXF1 | -2.71496 | 3.805222 | 4.60E-145 | 2.07E-142 |
| CD101 | -2.72622 | 2.531203 | 7.50E-145 | 3.30E-142 |
| TMEM100 | -4.32256 | 4.719984 | 1.37E-143 | 5.88E-141 |
| TAL1 | -2.75995 | 2.1535 | 1.98E-143 | 8.31E-141 |
| SH2D3C | -2.26377 | 4.716685 | 3.02E-142 | 1.24E-139 |
| CYYR1 | -2.24463 | 4.191811 | 3.81E-140 | 1.53E-137 |
| PLAC9 | -2.68859 | 2.750771 | 1.41E-138 | 5.51E-136 |
| SGCG | -3.80472 | 0.047349 | 4.43E-137 | 1.70E-134 |
| GIMAP8 | -2.42466 | 4.683346 | 7.21E-137 | 2.71E-134 |
| CAV1 | -3.40383 | 8.199531 | 8.40E-137 | 3.09E-134 |
| SMAD6 | -2.5256 | 4.344041 | 7.78E-135 | 2.80E-132 |
| FGD5 | -2.22112 | 4.850733 | 1.34E-134 | 4.74E-132 |
| GRK5 | -2.46584 | 5.090819 | 1.50E-133 | 5.19E-131 |
| ADRB2 | -3.05104 | 3.370967 | 3.14E-132 | 1.07E-129 |
| LYVE1 | -3.16846 | 3.88084 | 7.73E-130 | 2.58E-127 |
| ARHGEF26 | -2.63761 | 4.737394 | 4.76E-128 | 1.56E-125 |
| GPD1 | -3.91535 | 3.707273 | 1.63E-127 | 5.26E-125 |
| LRRC32 | -2.33681 | 5.579976 | 4.84E-127 | 1.53E-124 |
| GYPE | -3.24747 | -0.11852 | 8.95E-127 | 2.78E-124 |
| ARHGEF15 | -2.42512 | 3.895968 | 1.58E-126 | 4.82E-124 |
| STARD8 | -2.18111 | 4.037784 | 6.46E-126 | 1.94E-123 |
| ST8SIA6 | -3.50818 | 2.621215 | 7.78E-125 | 2.30E-122 |
| VIPR1 | -3.17372 | 4.78448 | 2.20E-124 | 6.40E-122 |
| SOX7 | -2.90776 | 2.82162 | 2.96E-124 | 8.48E-122 |
| CCM2L | -2.49789 | 1.360334 | 3.92E-124 | 1.11E-121 |
| MYCT1 | -2.22912 | 3.578204 | 4.97E-124 | 1.38E-121 |
| HBB | -4.23309 | 6.981671 | 9.52E-124 | 2.60E-121 |
| CLEC14A | -2.27059 | 5.151936 | 1.05E-123 | 2.81E-121 |
| HBA2 | -4.12711 | 4.465839 | 1.51E-122 | 4.01E-120 |
| GPM6A | -4.41288 | 3.282968 | 4.07E-122 | 1.06E-119 |
| PRKCE | -1.83168 | 4.623213 | 3.02E-121 | 7.78E-119 |
| STARD13 | -1.97949 | 4.29575 | 9.24E-121 | 2.35E-118 |
| CLEC1A | -2.25771 | 2.142311 | 1.50E-119 | 3.76E-117 |
| CSRNP1 | -2.35298 | 6.23705 | 2.32E-119 | 5.73E-117 |
| CLIC5 | -3.60001 | 6.332803 | 3.62E-119 | 8.81E-117 |
| ERG | -2.1123 | 4.555286 | 1.52E-118 | 3.66E-116 |
| INMT | -3.48732 | 5.779408 | 1.65E-118 | 3.92E-116 |
| TNNC1 | -3.5394 | 3.912303 | 2.86E-118 | 6.70E-116 |
| NOVA2 | -2.38447 | 2.644977 | 5.35E-118 | 1.24E-115 |
| MMRN2 | -2.10757 | 5.028406 | 5.26E-117 | 1.20E-114 |
| EMCN | -2.7144 | 4.440005 | 1.13E-116 | 2.54E-114 |
| SCUBE1 | -3.5379 | 3.080682 | 4.94E-116 | 1.10E-113 |
| CD300LG | -4.9335 | 1.526675 | 8.83E-116 | 1.94E-113 |
| MCEMP1 | -4.00852 | 4.20306 | 1.17E-115 | 2.53E-113 |
| STXBP6 | -3.46971 | 3.154562 | 3.62E-115 | 7.78E-113 |
| USHBP1 | -2.27746 | 1.723166 | 4.03E-115 | 8.55E-113 |
| RXFP1 | -3.0574 | 1.268506 | 1.05E-114 | 2.21E-112 |
| HBA1 | -4.33471 | -0.96113 | 2.56E-114 | 5.31E-112 |
| THSD1 | -2.21352 | 2.678323 | 2.63E-114 | 5.38E-112 |
| TAMALIN | -2.31658 | 3.74085 | 1.97E-113 | 3.99E-111 |
| AOC3 | -2.62419 | 6.410468 | 2.08E-113 | 4.18E-111 |
| ECSCR | -2.22171 | 0.143869 | 2.77E-113 | 5.50E-111 |
| GPIHBP1 | -3.68239 | 3.262416 | 1.01E-112 | 1.99E-110 |
| SLC39A8 | -2.46464 | 7.591001 | 1.10E-112 | 2.13E-110 |
| C20orf202 | -2.52931 | -0.99437 | 3.52E-112 | 6.76E-110 |
| NECAB1 | -3.16863 | 2.212041 | 2.97E-111 | 5.63E-109 |
| PTPRB | -2.5255 | 5.751312 | 3.27E-109 | 6.14E-107 |
| ALAS2 | -4.0545 | -0.81334 | 3.34E-109 | 6.20E-107 |
| SOX17 | -2.6789 | 1.990863 | 7.06E-109 | 1.30E-106 |
| C14orf132 | -2.60948 | 4.686015 | 8.60E-109 | 1.57E-106 |
| ARHGAP6 | -2.32097 | 2.750342 | 1.06E-108 | 1.91E-106 |
| PDLIM2 | -1.94663 | 4.527137 | 1.10E-108 | 1.97E-106 |
| CD93 | -2.18026 | 7.046181 | 2.92E-108 | 5.16E-106 |
| HIGD1B | -2.71851 | 1.665045 | 7.90E-108 | 1.38E-105 |
| KANK2 | -1.61149 | 6.779716 | 1.14E-107 | 1.97E-105 |
| CAT | -1.87532 | 7.050894 | 3.26E-106 | 5.60E-104 |
| LMO2 | -1.89136 | 3.99752 | 6.83E-106 | 1.16E-103 |
| CA4 | -4.32116 | 2.88851 | 1.47E-105 | 2.48E-103 |
| RASIP1 | -2.28261 | 3.995869 | 1.72E-105 | 2.87E-103 |
| WNT3A | -4.07434 | 1.38713 | 3.01E-105 | 4.99E-103 |
| CLEC4M | -4.44133 | -1.29161 | 1.75E-104 | 2.87E-102 |
| FEZ1 | -2.12197 | 3.373266 | 2.22E-104 | 3.61E-102 |
| SASH1 | -1.82004 | 5.533376 | 2.36E-104 | 3.81E-102 |
| TNS1 | -2.14083 | 8.495235 | 5.54E-104 | 8.84E-102 |
| BTNL9 | -3.38808 | 3.753621 | 7.30E-104 | 1.15E-101 |
| CD5L | -4.01803 | -0.86322 | 2.55E-103 | 4.01E-101 |
| ANOS1 | -2.76528 | 5.858696 | 1.44E-102 | 2.23E-100 |
| EFCC1 | -2.55317 | 2.788898 | 7.39E-102 | 1.14E-99 |
| SLIT2 | -2.45078 | 5.301819 | 1.16E-101 | 1.77E-99 |
| NCKAP5 | -3.4881 | 3.670307 | 5.35E-101 | 8.11E-99 |
| SPTBN1 | -1.71606 | 8.999264 | 4.60E-100 | 6.92E-98 |
| NMUR1 | -2.64811 | 0.879277 | 8.41E-100 | 1.25E-97 |
| TENT5B | -2.7835 | 3.341721 | 9.19E-100 | 1.36E-97 |
| FREM3 | -4.23615 | -0.77425 | 1.03E-99 | 1.50E-97 |
| JPH4 | -2.56945 | 0.87784 | 1.33E-99 | 1.94E-97 |
| HBEGF | -2.55091 | 5.411493 | 2.35E-99 | 3.39E-97 |
| NDST1 | -1.56708 | 7.030312 | 5.64E-98 | 8.07E-96 |
| GLIPR2 | -2.18353 | 5.699984 | 8.62E-98 | 1.22E-95 |
| CAVIN1 | -2.05016 | 8.079053 | 1.01E-97 | 1.42E-95 |
| HEG1 | -2.09736 | 6.803825 | 1.52E-97 | 2.13E-95 |
| GIMAP6 | -2.06582 | 5.027971 | 1.98E-97 | 2.74E-95 |
| SIRPB1 | -2.75384 | 3.208519 | 6.29E-97 | 8.66E-95 |
| ANKRD1 | -4.39673 | 3.733314 | 6.53E-97 | 8.92E-95 |
| OVCH1 | -3.8426 | -0.44834 | 1.19E-96 | 1.61E-94 |
| SCN4B | -2.78378 | 3.390576 | 3.32E-96 | 4.47E-94 |
| ADAMTS8 | -3.49304 | 3.44828 | 3.70E-96 | 4.95E-94 |
| MYOC | -4.48637 | -0.29004 | 4.02E-96 | 5.33E-94 |
| RHOJ | -1.83957 | 3.89173 | 2.11E-95 | 2.78E-93 |
| ARHGAP31 | -2.09914 | 5.82864 | 8.53E-95 | 1.11E-92 |
| THBD | -2.40776 | 6.059977 | 1.31E-94 | 1.71E-92 |
| TMEM204 | -1.88188 | 4.552394 | 1.92E-94 | 2.48E-92 |
| CSF3 | -4.62746 | 3.361592 | 7.07E-94 | 9.05E-92 |
| ARC | -3.42258 | 1.443111 | 2.81E-93 | 3.57E-91 |
| SEMA6A | -2.51932 | 3.750571 | 2.91E-93 | 3.67E-91 |
| PYCR1 | 3.72408 | 6.432597 | 4.52E-93 | 5.65E-91 |
| TNR | -3.81954 | 0.658728 | 4.54E-93 | 5.65E-91 |
| DNASE1L3 | -3.45909 | 2.452005 | 9.08E-93 | 1.12E-90 |
| PPP1R15A | -1.83981 | 6.835367 | 2.59E-92 | 3.18E-90 |
| PNPLA6 | -1.54116 | 6.365162 | 3.16E-92 | 3.85E-90 |
| CASKIN2 | -1.68323 | 5.451043 | 3.32E-92 | 4.02E-90 |
| FAM110D | -2.28526 | 1.302047 | 5.50E-92 | 6.61E-90 |
| UPK3B | -4.1252 | 4.868883 | 6.01E-92 | 7.17E-90 |
| FHL5 | -2.73302 | 1.989119 | 3.17E-91 | 3.76E-89 |
| GIMAP1 | -2.00388 | 3.103776 | 5.25E-90 | 6.18E-88 |
| ADPRH | -1.5708 | 4.328606 | 6.01E-90 | 7.04E-88 |
| OR6K3 | -4.01346 | -3.18255 | 7.06E-90 | 8.22E-88 |
| GSTM5 | -2.42483 | 2.231494 | 1.27E-89 | 1.46E-87 |
| LMCD1 | -1.72115 | 5.456182 | 2.61E-89 | 2.99E-87 |
| TGFBR3 | -2.53372 | 4.736365 | 5.80E-89 | 6.63E-87 |
| LTBP4 | -2.19172 | 7.179423 | 5.93E-89 | 6.72E-87 |
| TCF21 | -3.06888 | 2.738156 | 1.11E-88 | 1.25E-86 |
| FAM189A2 | -2.80636 | 4.557508 | 1.30E-88 | 1.45E-86 |
| FRMD3 | -2.39775 | 2.562857 | 1.30E-88 | 1.45E-86 |
| ADARB1 | -1.72734 | 4.926079 | 1.67E-88 | 1.85E-86 |
| CGNL1 | -2.18545 | 5.756495 | 2.25E-88 | 2.47E-86 |
| NLRC4 | -2.04355 | 2.672665 | 2.50E-88 | 2.73E-86 |
| DPP6 | -3.21496 | 0.075037 | 2.59E-88 | 2.82E-86 |
| JCAD | -2.07009 | 6.059443 | 5.74E-88 | 6.20E-86 |
| SSTR4 | -3.85573 | -3.19742 | 7.77E-88 | 8.32E-86 |
| DENND3 | -1.70795 | 5.951151 | 7.80E-88 | 8.32E-86 |
| NXPH3 | -2.39116 | 2.00741 | 3.48E-87 | 3.69E-85 |
| NPR1 | -2.58677 | 4.476198 | 1.96E-86 | 2.07E-84 |
| KLF6 | -1.76116 | 7.891409 | 2.08E-86 | 2.18E-84 |
| MYADM | -1.94663 | 7.004154 | 3.87E-86 | 4.04E-84 |
| GPR146 | -2.04847 | 0.225598 | 1.70E-85 | 1.76E-83 |
| CHRM1 | -4.44596 | -0.55122 | 1.70E-85 | 1.76E-83 |
| SPN | -2.25044 | 5.138303 | 4.45E-85 | 4.56E-83 |
| LDLR | -2.08479 | 7.111029 | 1.22E-84 | 1.24E-82 |
| TIE1 | -1.94712 | 5.18307 | 1.76E-84 | 1.79E-82 |
| SH3GL3 | -4.20606 | 0.007539 | 2.58E-84 | 2.60E-82 |
| LHFPL6 | -1.67713 | 5.222021 | 3.73E-84 | 3.74E-82 |
| VWF | -2.2939 | 8.271737 | 5.43E-84 | 5.41E-82 |
| RAI2 | -2.10279 | 3.828202 | 6.74E-84 | 6.68E-82 |
| RCAN1 | -1.77917 | 5.665223 | 1.43E-83 | 1.41E-81 |
| SERINC1 | -1.14204 | 7.846791 | 1.90E-83 | 1.86E-81 |
| F8 | -1.77829 | 4.545394 | 2.31E-83 | 2.26E-81 |
| CLDN5 | -2.68057 | 5.41975 | 1.23E-82 | 1.19E-80 |
| IL3RA | -1.6965 | 2.853382 | 1.70E-82 | 1.64E-80 |
| C10orf67 | -3.73944 | 0.293772 | 2.08E-82 | 1.99E-80 |
| CMTM2 | -2.26994 | -0.87014 | 2.49E-82 | 2.37E-80 |
| SLC4A1 | -3.34563 | -1.94658 | 4.05E-82 | 3.85E-80 |
| PEAK1 | -1.60984 | 5.947803 | 5.39E-82 | 5.09E-80 |
| OR6N1 | -4.0969 | -3.18866 | 7.18E-82 | 6.75E-80 |
| CCDC85A | -2.73256 | 0.590531 | 1.38E-81 | 1.29E-79 |
| STX12 | -1.00977 | 6.289667 | 1.86E-81 | 1.73E-79 |
| NOTCH4 | -1.80243 | 4.894171 | 3.17E-81 | 2.93E-79 |
| TACC1 | -1.79854 | 7.150634 | 5.68E-81 | 5.22E-79 |
| LAMP3 | -2.74921 | 7.505624 | 1.53E-80 | 1.40E-78 |
| CDO1 | -2.66509 | 1.650063 | 3.72E-80 | 3.39E-78 |
| ADAMTS1 | -2.31238 | 5.942152 | 4.35E-80 | 3.94E-78 |
| MGAT3 | -2.99687 | 4.04486 | 3.97E-79 | 3.58E-77 |
| TRPV2 | -1.85497 | 4.899996 | 5.19E-79 | 4.66E-77 |
| PTPN5 | -3.37629 | -0.80617 | 6.13E-79 | 5.48E-77 |
| ADGRE3 | -2.83103 | 0.681399 | 6.18E-79 | 5.49E-77 |
| WFS1 | -1.71392 | 6.073009 | 7.91E-79 | 6.99E-77 |
| VEGFD | -3.55312 | 3.445456 | 3.32E-78 | 2.92E-76 |
| PLPP3 | -1.36153 | 5.972718 | 6.12E-78 | 5.36E-76 |
| SEMA5A | -2.48979 | 5.157856 | 1.97E-77 | 1.71E-75 |
| SESN1 | -1.58911 | 4.530248 | 2.37E-77 | 2.06E-75 |
| BCL6B | -1.73729 | 4.123079 | 7.17E-77 | 6.19E-75 |
| TEDC2 | 3.53928 | 2.680216 | 9.33E-77 | 8.01E-75 |
| ASPA | -2.59082 | 0.975609 | 1.12E-76 | 9.55E-75 |
| TUBB1 | -2.61316 | -0.21133 | 1.16E-76 | 9.87E-75 |
| SELP | -2.29729 | 3.527834 | 1.59E-76 | 1.34E-74 |
| SYNM | -1.7844 | 3.802043 | 2.07E-76 | 1.75E-74 |
| VSIR | -1.57034 | 6.029559 | 2.18E-76 | 1.83E-74 |
| MFAP4 | -2.62557 | 7.098861 | 2.41E-76 | 2.02E-74 |
| PEAR1 | -1.98218 | 3.293066 | 2.95E-76 | 2.45E-74 |
| DPEP2 | -2.14457 | 2.578231 | 8.55E-76 | 7.07E-74 |
| CD36 | -2.87466 | 5.669247 | 1.07E-75 | 8.83E-74 |
| FGR | -2.0749 | 4.991241 | 1.68E-75 | 1.37E-73 |
| CAV2 | -2.32579 | 7.065198 | 1.85E-75 | 1.51E-73 |
| COX4I2 | -2.25513 | 2.581389 | 1.94E-75 | 1.57E-73 |
| SLC19A3 | -2.87268 | 2.830187 | 2.80E-75 | 2.27E-73 |
| ABI3BP | -2.46391 | 5.49162 | 4.22E-75 | 3.40E-73 |
| CMTM5 | -2.88496 | -2.53672 | 4.36E-75 | 3.49E-73 |
| SPARCL1 | -1.93671 | 7.833374 | 5.32E-75 | 4.25E-73 |
| TGFBR2 | -1.63035 | 7.916323 | 1.32E-74 | 1.05E-72 |
| BMPR2 | -1.30102 | 7.080841 | 1.44E-74 | 1.14E-72 |
| COX7A1 | -1.90914 | 2.75233 | 1.62E-74 | 1.28E-72 |
| CD52 | -2.34385 | 5.585104 | 5.35E-74 | 4.19E-72 |
| PRKG2 | -2.6098 | 1.902256 | 5.60E-74 | 4.37E-72 |
| FAM162B | -2.26847 | 1.779193 | 6.23E-74 | 4.84E-72 |
| GRIA1 | -3.68642 | 2.082654 | 6.70E-74 | 5.18E-72 |
| GCOM1 | -2.53475 | 1.950017 | 1.00E-73 | 7.71E-72 |
| AGRP | -3.03739 | -0.19188 | 1.10E-73 | 8.43E-72 |
| PI16 | -3.56009 | 1.353415 | 1.56E-73 | 1.20E-71 |
| HTR3C | -4.51755 | -1.04797 | 3.24E-73 | 2.47E-71 |
| ITLN2 | -4.61825 | 2.047223 | 5.13E-73 | 3.88E-71 |
| TMEM88 | -2.1159 | 1.599694 | 6.81E-73 | 5.14E-71 |
| TSPAN18 | -1.98962 | 4.53354 | 9.30E-73 | 6.99E-71 |
| MS4A7 | -2.08541 | 5.550281 | 1.45E-72 | 1.08E-70 |
| IQSEC3 | -2.55819 | 1.4718 | 1.91E-72 | 1.42E-70 |
| OLR1 | -2.51659 | 5.805781 | 2.17E-72 | 1.61E-70 |
| DKK2 | -2.27745 | 2.608952 | 2.85E-72 | 2.11E-70 |
| PPM1F | -1.24283 | 5.169534 | 3.21E-72 | 2.37E-70 |
| GYPC | -1.7226 | 4.663263 | 3.39E-72 | 2.49E-70 |
| IQGAP3 | 3.64804 | 5.009579 | 7.93E-72 | 5.79E-70 |
| FLI1 | -1.64875 | 4.860057 | 8.57E-72 | 6.23E-70 |
| KIF17 | -1.97258 | 1.533027 | 1.22E-71 | 8.82E-70 |
| SNRK | -1.1411 | 5.077997 | 1.23E-71 | 8.91E-70 |
| FPR2 | -2.93992 | 2.568466 | 2.05E-71 | 1.47E-69 |
| TBX3 | -2.08145 | 3.961016 | 2.20E-71 | 1.57E-69 |
| AFAP1L1 | -1.66313 | 4.188943 | 2.20E-71 | 1.57E-69 |
| LGI3 | -4.23317 | 3.899525 | 2.31E-71 | 1.64E-69 |
| UNC45B | -2.51255 | -0.99493 | 3.21E-71 | 2.27E-69 |
| MASP1 | -2.68097 | 2.16619 | 3.55E-71 | 2.50E-69 |
| SNX22 | -2.21382 | 2.545449 | 3.77E-71 | 2.65E-69 |
| PALMD | -2.01809 | 4.10904 | 3.92E-71 | 2.74E-69 |
| SERTM1 | -4.75633 | 1.447038 | 6.45E-71 | 4.49E-69 |
| ABCA8 | -2.80566 | 4.007517 | 7.13E-71 | 4.95E-69 |
| ETV4 | 3.899445 | 5.575394 | 8.90E-71 | 6.15E-69 |
| SFTPC | -4.70049 | 11.91696 | 1.15E-70 | 7.92E-69 |
| RS1 | -3.9414 | -0.4525 | 1.15E-70 | 7.92E-69 |
| ITM2A | -2.00758 | 4.705533 | 1.43E-70 | 9.76E-69 |
| SPRYD7 | -1.24929 | 4.137596 | 1.59E-70 | 1.08E-68 |
| SLC25A25 | -1.62603 | 4.895997 | 2.35E-70 | 1.59E-68 |
| JDP2 | -1.42962 | 5.20883 | 3.75E-70 | 2.54E-68 |
| GRIK4 | -2.4718 | 0.230002 | 4.94E-70 | 3.32E-68 |
| GDF10 | -3.159 | 2.691869 | 5.96E-70 | 3.99E-68 |
| FAM83A | 6.833016 | 7.232953 | 5.98E-70 | 4.00E-68 |
| PHACTR1 | -2.15927 | 3.226648 | 6.35E-70 | 4.22E-68 |
| PCDH12 | -1.68131 | 4.648401 | 8.14E-70 | 5.40E-68 |
| PKNOX2 | -2.40949 | 2.459348 | 1.01E-69 | 6.64E-68 |
| ALDH18A1 | 1.649418 | 6.868699 | 1.16E-69 | 7.63E-68 |
| ALKAL2 | -2.97106 | 0.744423 | 1.43E-69 | 9.39E-68 |
| SLC14A1 | -2.79623 | 1.893007 | 1.49E-69 | 9.73E-68 |
| ADCY4 | -1.72931 | 3.448301 | 2.13E-69 | 1.39E-67 |
| SYNPO | -1.70228 | 7.317318 | 2.43E-69 | 1.58E-67 |
| ADRB1 | -3.10949 | 2.869459 | 2.59E-69 | 1.67E-67 |
| ELAPOR2 | -2.06327 | 4.771332 | 5.59E-69 | 3.60E-67 |
| DES | -3.02413 | 4.07366 | 2.30E-68 | 1.47E-66 |
| TOP2A | 3.898533 | 6.986251 | 2.46E-68 | 1.57E-66 |
| HPS5 | -1.09655 | 5.247605 | 2.94E-68 | 1.88E-66 |
| FXYD6 | -1.8204 | 2.942067 | 3.21E-68 | 2.04E-66 |
| CXCR2 | -2.5675 | 1.526168 | 3.92E-68 | 2.48E-66 |
| GOLM1 | 2.66953 | 8.287607 | 4.45E-68 | 2.80E-66 |
| DIPK2B | -1.74431 | 4.114761 | 5.49E-68 | 3.45E-66 |
| SAPCD2 | 3.811975 | 3.40154 | 6.26E-68 | 3.92E-66 |
| GLDN | -2.49529 | 3.30402 | 2.18E-67 | 1.36E-65 |
| ACADL | -3.08413 | 2.832471 | 3.58E-67 | 2.23E-65 |
| TGM1 | -2.40037 | 1.840558 | 5.59E-67 | 3.46E-65 |
| MARCO | -2.99592 | 6.770879 | 5.60E-67 | 3.46E-65 |
| MSR1 | -2.27736 | 6.581406 | 7.23E-67 | 4.45E-65 |
| UBE2T | 3.341579 | 4.303765 | 8.22E-67 | 5.04E-65 |
| ABCG2 | -2.01615 | 2.800722 | 9.98E-67 | 6.10E-65 |
| ACTN2 | -2.76074 | 0.389296 | 1.28E-66 | 7.78E-65 |
| CBX7 | -1.61138 | 4.954642 | 1.40E-66 | 8.52E-65 |
| METTL7A | -1.85803 | 6.682922 | 1.58E-66 | 9.57E-65 |
| FERMT2 | -1.38522 | 5.899638 | 1.64E-66 | 9.89E-65 |
| SFXN1 | 1.542587 | 5.658818 | 2.37E-66 | 1.43E-64 |
| RASGRP4 | -1.90972 | 2.068902 | 2.72E-66 | 1.63E-64 |
| APOLD1 | -1.97753 | 4.899651 | 4.51E-66 | 2.69E-64 |
| SLIT3 | -2.4461 | 5.375533 | 5.69E-66 | 3.39E-64 |
| SULT1C4 | -2.21961 | 2.662513 | 7.43E-66 | 4.41E-64 |
| LRRC2 | -2.42199 | 0.69533 | 1.17E-65 | 6.94E-64 |
| SYNPO2L | -2.60701 | -0.52983 | 1.31E-65 | 7.72E-64 |
| OSCAR | -2.19134 | 4.125332 | 1.37E-65 | 8.07E-64 |
| INKA2 | -1.57495 | 3.11762 | 1.58E-65 | 9.24E-64 |
| FO681492.1 | -2.81593 | 0.944254 | 1.59E-65 | 9.30E-64 |
| AMOTL1 | -1.72384 | 5.689944 | 1.69E-65 | 9.84E-64 |
| C5AR1 | -1.93727 | 5.193531 | 2.98E-65 | 1.73E-63 |
| TMEM184A | 3.167511 | 5.499794 | 3.93E-65 | 2.27E-63 |
| CCDC141 | -2.992 | 1.642302 | 4.55E-65 | 2.62E-63 |
| ADM2 | 3.495346 | 4.15827 | 9.49E-65 | 5.45E-63 |
| RNF144B | -1.65983 | 5.529959 | 1.37E-64 | 7.87E-63 |
| CD34 | -1.64178 | 5.998817 | 1.55E-64 | 8.84E-63 |
| SRPK1 | 1.634312 | 5.576296 | 1.61E-64 | 9.14E-63 |
| MPIG6B | -2.16312 | -0.65625 | 2.17E-64 | 1.23E-62 |
| CNTN6 | -3.41835 | 1.852735 | 2.19E-64 | 1.24E-62 |
| TOM1L2 | -1.34068 | 5.859517 | 2.62E-64 | 1.47E-62 |
| CDC25C | 3.708373 | 2.235284 | 2.89E-64 | 1.63E-62 |
| ARHGEF39 | 2.769392 | 2.64214 | 4.26E-64 | 2.38E-62 |
| ERCC6L | 3.318444 | 2.307185 | 4.75E-64 | 2.65E-62 |
| KIF4A | 3.854426 | 4.334926 | 5.09E-64 | 2.83E-62 |
| PLCL1 | -1.72119 | 2.562414 | 5.31E-64 | 2.94E-62 |
| LGALSL | -1.79959 | 4.821043 | 6.24E-64 | 3.45E-62 |
| C1orf162 | -1.78604 | 4.793554 | 7.04E-64 | 3.88E-62 |
| LIN7A | -2.4888 | 2.806753 | 7.91E-64 | 4.35E-62 |
| OTC | -3.60366 | -2.11125 | 8.72E-64 | 4.78E-62 |
| UHRF1 | 3.379536 | 4.024643 | 8.99E-64 | 4.92E-62 |
| PRAM1 | -2.12555 | 3.023485 | 9.33E-64 | 5.08E-62 |
| KIF1C | -1.28393 | 7.351815 | 1.05E-63 | 5.68E-62 |
| GIMAP7 | -1.78426 | 4.153748 | 1.25E-63 | 6.79E-62 |
| SELE | -2.90711 | 2.416839 | 1.36E-63 | 7.33E-62 |
| B3GNT3 | 4.380937 | 5.645642 | 1.50E-63 | 8.10E-62 |
| DLC1 | -2.21539 | 6.902808 | 2.29E-63 | 1.23E-61 |
| ITPRIP | -1.62502 | 5.177411 | 2.84E-63 | 1.52E-61 |
| KLF13 | -1.35596 | 6.899121 | 3.03E-63 | 1.62E-61 |
| KCNA4 | -3.86775 | -0.45035 | 4.76E-63 | 2.53E-61 |
| TBX2 | -1.87678 | 5.116021 | 4.80E-63 | 2.55E-61 |
| KLF9 | -1.64023 | 6.217942 | 5.36E-63 | 2.84E-61 |
| CORO2B | -2.16374 | 2.208737 | 5.74E-63 | 3.03E-61 |
| VSIG4 | -2.36266 | 6.304979 | 5.81E-63 | 3.06E-61 |
| RECK | -1.53736 | 3.82159 | 6.67E-63 | 3.50E-61 |
| MSRB3 | -1.82727 | 4.994135 | 8.96E-63 | 4.68E-61 |
| ADGRE1 | -2.64239 | 1.916964 | 1.09E-62 | 5.66E-61 |
| LRRN3 | -2.72218 | 2.008571 | 1.15E-62 | 5.99E-61 |
| ODF3L1 | -2.32993 | -0.22604 | 1.20E-62 | 6.20E-61 |
| QKI | -1.30645 | 7.026098 | 1.35E-62 | 6.97E-61 |
| IGSF10 | -2.78894 | 3.517456 | 1.70E-62 | 8.74E-61 |
| ESAM | -1.91091 | 6.004712 | 1.81E-62 | 9.29E-61 |
| AGTPBP1 | -1.18394 | 4.509453 | 2.02E-62 | 1.04E-60 |
| DACH1 | -2.44366 | 2.643367 | 2.74E-62 | 1.40E-60 |
| TMEM177 | 1.606416 | 3.587842 | 3.07E-62 | 1.57E-60 |
| KIAA0040 | -1.23557 | 5.900392 | 3.24E-62 | 1.65E-60 |
| KLF4 | -2.25602 | 5.694497 | 3.57E-62 | 1.81E-60 |
| MAMDC2 | -2.6468 | 3.860759 | 4.48E-62 | 2.26E-60 |
| CD300C | -2.06575 | 2.324716 | 4.82E-62 | 2.43E-60 |
| COL6A6 | -2.79127 | 3.804496 | 5.33E-62 | 2.68E-60 |
| KIF14 | 3.784834 | 3.394949 | 5.71E-62 | 2.86E-60 |
| E2F8 | 3.197212 | 2.993444 | 6.04E-62 | 3.02E-60 |
| TNXB | -2.67902 | 5.37986 | 8.22E-62 | 4.10E-60 |
| XRCC2 | 3.267202 | 2.8407 | 9.67E-62 | 4.81E-60 |
| RILPL2 | -1.27911 | 4.987103 | 1.37E-61 | 6.79E-60 |
| PAICS | 1.890985 | 7.101463 | 1.57E-61 | 7.78E-60 |
| ADAMTSL3 | -2.27407 | 3.36203 | 2.26E-61 | 1.11E-59 |
| NEK2 | 3.767662 | 4.023617 | 3.17E-61 | 1.56E-59 |
| STIL | 2.592098 | 3.786546 | 3.66E-61 | 1.79E-59 |
| SIGLEC11 | -2.39335 | 0.139117 | 4.46E-61 | 2.18E-59 |
| ORC6 | 3.077097 | 3.018942 | 4.74E-61 | 2.31E-59 |
| KIF20A | 3.185444 | 4.34804 | 5.50E-61 | 2.67E-59 |
| RAPGEF4 | -1.79727 | 2.864262 | 6.08E-61 | 2.95E-59 |
| SPAG5 | 3.116823 | 4.761828 | 7.86E-61 | 3.80E-59 |
| EZH2 | 2.582104 | 4.454763 | 8.05E-61 | 3.88E-59 |
| S100A3 | -2.3337 | 1.433128 | 9.94E-61 | 4.78E-59 |
| HJURP | 3.880843 | 4.038759 | 1.56E-60 | 7.47E-59 |
| CASS4 | -1.87419 | 3.277817 | 1.83E-60 | 8.77E-59 |
| PTCRA | -2.40481 | -0.35928 | 2.17E-60 | 1.04E-58 |
| PPAT | 1.958207 | 4.374364 | 2.18E-60 | 1.04E-58 |
| GPX3 | -2.23313 | 8.306392 | 2.19E-60 | 1.04E-58 |
| EFNA4 | 2.237854 | 4.167862 | 5.12E-60 | 2.42E-58 |
| KIF26B | 3.167205 | 5.627266 | 7.15E-60 | 3.38E-58 |
| BUB1B | 3.451221 | 3.650921 | 7.49E-60 | 3.53E-58 |
| PLEKHN1 | 3.164586 | 2.96618 | 8.04E-60 | 3.78E-58 |
| CENPF | 3.526662 | 5.805914 | 8.60E-60 | 4.03E-58 |
| MFNG | -1.50374 | 4.433709 | 1.00E-59 | 4.68E-58 |
| CXCR1 | -2.84256 | 0.759026 | 1.02E-59 | 4.73E-58 |
| ADH1B | -3.24411 | 6.543452 | 1.10E-59 | 5.10E-58 |
| ASPM | 3.766954 | 4.555529 | 1.16E-59 | 5.40E-58 |
| PLK1 | 3.222798 | 4.423923 | 1.36E-59 | 6.29E-58 |
| CDC6 | 3.451352 | 4.509107 | 1.64E-59 | 7.55E-58 |
| SYNC | -1.81968 | 1.356127 | 2.80E-59 | 1.29E-57 |
| ENG | -1.57676 | 7.32272 | 3.20E-59 | 1.47E-57 |
| DLGAP5 | 3.707807 | 4.120674 | 3.78E-59 | 1.73E-57 |
| GFOD1 | -1.76393 | 3.54061 | 4.88E-59 | 2.23E-57 |
| LGR4 | 2.748445 | 6.237291 | 5.48E-59 | 2.49E-57 |
| ANGPT1 | -2.24628 | 4.145623 | 5.55E-59 | 2.52E-57 |
| MYO19 | 1.681453 | 5.511147 | 6.06E-59 | 2.75E-57 |
| HAS1 | -3.33673 | 0.861386 | 1.26E-58 | 5.69E-57 |
| KIF2C | 3.603729 | 4.473602 | 1.42E-58 | 6.38E-57 |
| SPTBN2 | 2.539935 | 6.154936 | 1.54E-58 | 6.91E-57 |
| ZNF366 | -1.9281 | 1.54025 | 2.00E-58 | 8.96E-57 |
| RBMS2 | -1.20811 | 6.395388 | 2.41E-58 | 1.08E-56 |
| MEX3A | 4.217649 | 4.980049 | 2.71E-58 | 1.21E-56 |
| SOSTDC1 | -3.69668 | 2.7462 | 2.73E-58 | 1.22E-56 |
| GNAQ | -1.14557 | 6.795283 | 4.11E-58 | 1.82E-56 |
| FAM124B | -1.82344 | 1.197847 | 5.27E-58 | 2.33E-56 |
| LATS2 | -1.16918 | 5.081454 | 5.46E-58 | 2.41E-56 |
| PTPRQ | -3.55933 | 0.678516 | 5.90E-58 | 2.60E-56 |
| NUF2 | 3.742123 | 3.749998 | 6.00E-58 | 2.63E-56 |
| EXO1 | 3.623388 | 3.327881 | 7.21E-58 | 3.16E-56 |
| RCC1 | 1.782417 | 6.092067 | 7.73E-58 | 3.38E-56 |
| ITGA8 | -2.07049 | 4.626983 | 8.12E-58 | 3.54E-56 |
| IQCN | -2.40159 | 3.346951 | 8.26E-58 | 3.59E-56 |
| CDC20 | 3.797373 | 5.180516 | 1.17E-57 | 5.06E-56 |
| MYH2 | -3.06735 | -1.56306 | 1.20E-57 | 5.19E-56 |
| ANLN | 3.810722 | 5.592089 | 1.46E-57 | 6.30E-56 |
| SPAG4 | 2.930365 | 4.049739 | 1.47E-57 | 6.34E-56 |
| SEPTIN4 | -1.46027 | 3.296401 | 1.57E-57 | 6.74E-56 |
| MMRN1 | -2.32849 | 3.807958 | 1.80E-57 | 7.72E-56 |
| ACP5 | -1.78917 | 7.174513 | 2.34E-57 | 1.00E-55 |
| IL6 | -2.80385 | 3.53718 | 2.39E-57 | 1.02E-55 |
| DEPDC1B | 3.64197 | 2.98221 | 2.51E-57 | 1.07E-55 |
| MELK | 3.643778 | 4.035086 | 2.62E-57 | 1.11E-55 |
| GINS1 | 3.070174 | 4.018937 | 3.14E-57 | 1.33E-55 |
| CDCA8 | 3.071308 | 4.342728 | 3.41E-57 | 1.44E-55 |
| RSPO1 | -3.04857 | 0.762587 | 3.53E-57 | 1.49E-55 |
| MYL9 | -1.68613 | 7.704686 | 3.57E-57 | 1.50E-55 |
| CD83 | -1.66805 | 5.179959 | 4.29E-57 | 1.80E-55 |
| CFD | -2.32253 | 5.207765 | 4.71E-57 | 1.97E-55 |
| TBX4 | -2.15729 | 3.840734 | 4.74E-57 | 1.98E-55 |
| TIMP3 | -1.93534 | 9.341193 | 5.64E-57 | 2.35E-55 |
| CTHRC1 | 3.809088 | 6.210408 | 6.06E-57 | 2.52E-55 |
| INPP5K | -1.07317 | 5.616937 | 6.24E-57 | 2.59E-55 |
| PLA2G4F | -2.64811 | 4.651186 | 6.85E-57 | 2.84E-55 |
| HSPB8 | -1.95265 | 5.240453 | 7.95E-57 | 3.28E-55 |
| ACE | -1.70325 | 5.467787 | 1.11E-56 | 4.58E-55 |
| RECQL4 | 3.061202 | 4.421294 | 1.30E-56 | 5.33E-55 |
| CASQ2 | -2.71882 | 0.747999 | 1.59E-56 | 6.52E-55 |
| DCC | -2.56119 | 1.168572 | 1.66E-56 | 6.78E-55 |
| CCL23 | -2.48464 | 0.881341 | 1.83E-56 | 7.48E-55 |
| KIF18B | 3.804238 | 3.755198 | 2.03E-56 | 8.26E-55 |
| P2RY1 | -1.71911 | 3.108341 | 2.28E-56 | 9.27E-55 |
| AHNAK | -1.89091 | 9.861815 | 2.71E-56 | 1.09E-54 |
| GATA2 | -1.83351 | 4.121113 | 3.75E-56 | 1.51E-54 |
| DAPK2 | -1.88953 | 4.765678 | 4.41E-56 | 1.77E-54 |
| ST6GALNAC5 | -2.14058 | 3.648613 | 4.48E-56 | 1.80E-54 |
| ADGRL2 | -1.85236 | 5.775007 | 5.41E-56 | 2.17E-54 |
| CHRNA2 | -3.54622 | -2.10718 | 5.54E-56 | 2.21E-54 |
| CALCOCO1 | -1.18107 | 6.533393 | 7.25E-56 | 2.89E-54 |
| RMI2 | 2.308871 | 4.010222 | 8.20E-56 | 3.26E-54 |
| CEP55 | 3.283159 | 4.600522 | 1.11E-55 | 4.40E-54 |
| CNRIP1 | -1.46041 | 3.230737 | 1.12E-55 | 4.46E-54 |
| CNOT11 | 1.160547 | 6.376704 | 1.17E-55 | 4.61E-54 |
| C20orf194 | -1.22716 | 4.814907 | 1.45E-55 | 5.70E-54 |
| LRRC36 | -2.88919 | 2.778237 | 1.69E-55 | 6.64E-54 |
| TROAP | 3.832499 | 3.697311 | 2.22E-55 | 8.72E-54 |
| CPED1 | -1.94871 | 3.962976 | 2.25E-55 | 8.82E-54 |
| SKA3 | 3.228713 | 2.894526 | 3.35E-55 | 1.31E-53 |
| SH2D4B | -2.19959 | -1.21982 | 3.44E-55 | 1.34E-53 |
| PDZD2 | -2.20134 | 5.267092 | 4.06E-55 | 1.58E-53 |
| DPYSL2 | -1.53322 | 7.666676 | 4.21E-55 | 1.63E-53 |
| TMEM47 | -1.70763 | 4.72016 | 4.72E-55 | 1.83E-53 |
| TPX2 | 3.668901 | 5.882271 | 5.08E-55 | 1.96E-53 |
| A2M | -1.8508 | 10.43108 | 6.43E-55 | 2.48E-53 |
| CCN5 | -2.14632 | 3.975407 | 7.34E-55 | 2.82E-53 |
| CTXND1 | -3.09688 | 1.467761 | 7.38E-55 | 2.83E-53 |
| DEPDC1 | 3.805308 | 3.351403 | 8.08E-55 | 3.09E-53 |
| PPP1R14B | 2.105926 | 6.62026 | 1.01E-54 | 3.87E-53 |
| SGO1 | 3.242225 | 1.775948 | 1.07E-54 | 4.10E-53 |
| CCNB1 | 3.003899 | 5.426595 | 1.10E-54 | 4.19E-53 |
| SYT15 | -2.44596 | -0.18677 | 1.14E-54 | 4.34E-53 |
| ARAP3 | -1.31835 | 4.609285 | 1.19E-54 | 4.50E-53 |
| FGFBP2 | -3.04991 | 0.429603 | 1.51E-54 | 5.72E-53 |
| TUBB3 | 4.476826 | 0.542105 | 1.52E-54 | 5.75E-53 |
| NHSL1 | -1.71635 | 4.98784 | 1.56E-54 | 5.89E-53 |
| PCDH17 | -1.66962 | 4.763454 | 1.57E-54 | 5.89E-53 |
| DOCK4 | -1.49534 | 5.227473 | 1.82E-54 | 6.84E-53 |
| ANGPTL7 | -3.47984 | -0.5273 | 2.20E-54 | 8.20E-53 |
| DNASE2B | -2.86943 | 0.210935 | 2.30E-54 | 8.57E-53 |
| KIF11 | 2.722946 | 4.791642 | 2.40E-54 | 8.91E-53 |
| DOK2 | -1.84832 | 4.509684 | 3.33E-54 | 1.23E-52 |
| GTSE1 | 3.127421 | 3.500611 | 3.35E-54 | 1.24E-52 |
| MVB12B | -1.49424 | 5.004841 | 3.35E-54 | 1.24E-52 |
| BIRC5 | 3.704594 | 5.406049 | 5.12E-54 | 1.89E-52 |
| CDCA3 | 3.3031 | 3.490755 | 5.14E-54 | 1.89E-52 |
| VEPH1 | -2.56945 | 4.469462 | 6.15E-54 | 2.26E-52 |
| EML1 | -1.6698 | 4.042443 | 6.98E-54 | 2.56E-52 |
| ZBED2 | -2.33444 | 2.820659 | 8.02E-54 | 2.93E-52 |
| ST6GALNAC3 | -1.93264 | 2.02317 | 1.20E-53 | 4.37E-52 |
| GP9 | -3.04746 | -2.66464 | 1.26E-53 | 4.58E-52 |
| GPM6B | -1.92642 | 3.708469 | 1.31E-53 | 4.74E-52 |
| PDK4 | -2.36487 | 6.24919 | 1.32E-53 | 4.77E-52 |
| FUT2 | 3.204459 | 4.598781 | 1.38E-53 | 5.00E-52 |
| UBE2C | 4.215442 | 5.330586 | 1.41E-53 | 5.10E-52 |
| S1PR4 | -1.76417 | 3.028408 | 1.69E-53 | 6.08E-52 |
| MMP19 | -1.99112 | 4.702409 | 1.75E-53 | 6.29E-52 |
| FOSB | -3.26873 | 7.645288 | 1.90E-53 | 6.81E-52 |
| LGI4 | -1.64068 | 1.382688 | 1.91E-53 | 6.82E-52 |
| CKAP2L | 3.196347 | 3.318584 | 1.97E-53 | 7.04E-52 |
| PDE2A | -1.74859 | 2.958417 | 2.13E-53 | 7.59E-52 |
| ZWINT | 2.636292 | 5.027742 | 2.47E-53 | 8.79E-52 |
| RRM2 | 3.233323 | 5.829177 | 2.50E-53 | 8.87E-52 |
| CCNB2 | 3.074277 | 4.400037 | 2.62E-53 | 9.27E-52 |
| ALOX5 | -1.8077 | 6.139635 | 2.82E-53 | 9.96E-52 |
| CBLC | 3.229176 | 4.37471 | 3.30E-53 | 1.16E-51 |
| HSPB6 | -2.48206 | 1.592025 | 3.78E-53 | 1.33E-51 |
| FGF10 | -2.99123 | 0.664162 | 4.33E-53 | 1.52E-51 |
| DUOX1 | -2.54295 | 6.116217 | 5.18E-53 | 1.82E-51 |
| CTNNAL1 | -1.36394 | 5.543091 | 6.21E-53 | 2.17E-51 |
| RAD54L | 3.158096 | 2.216871 | 6.22E-53 | 2.18E-51 |
| ABHD6 | -1.24375 | 3.297398 | 6.94E-53 | 2.42E-51 |
| OCIAD2 | 2.215362 | 6.886331 | 6.97E-53 | 2.43E-51 |
| EFNA3 | 3.063699 | 2.152648 | 9.07E-53 | 3.15E-51 |
| HLA-E | -1.31462 | 10.12128 | 9.57E-53 | 3.32E-51 |
| ZNF106 | -1.25543 | 6.399982 | 1.01E-52 | 3.49E-51 |
| PPP1R14A | -1.91672 | 3.419453 | 1.01E-52 | 3.49E-51 |
| TMPRSS4 | 4.849589 | 7.003075 | 1.07E-52 | 3.71E-51 |
| ADRA1A | -3.39593 | -0.33608 | 1.41E-52 | 4.85E-51 |
| RASL12 | -1.57541 | 3.965627 | 1.49E-52 | 5.12E-51 |
| IL7R | -2.00206 | 6.364965 | 1.52E-52 | 5.22E-51 |
| FRMD5 | 3.589341 | 3.001257 | 1.54E-52 | 5.27E-51 |
| WASF3 | -1.85209 | 2.658118 | 1.72E-52 | 5.88E-51 |
| RASGEF1B | -1.40268 | 4.842791 | 1.80E-52 | 6.12E-51 |
| FIBIN | -2.13891 | 3.793752 | 1.86E-52 | 6.32E-51 |
| FGFR4 | -2.43654 | 4.548778 | 2.12E-52 | 7.18E-51 |
| ZNF423 | -1.7812 | 2.302993 | 2.84E-52 | 9.61E-51 |
| GAS6 | -1.67507 | 6.716036 | 3.31E-52 | 1.12E-50 |
| MCM10 | 3.565497 | 3.282673 | 3.50E-52 | 1.18E-50 |
| EMP1 | -1.74941 | 7.567909 | 4.46E-52 | 1.50E-50 |
| BRIP1 | 2.727849 | 3.056919 | 5.29E-52 | 1.77E-50 |
| COL10A1 | 4.643739 | 6.029308 | 5.82E-52 | 1.95E-50 |
| C1orf112 | 1.772832 | 3.15458 | 5.96E-52 | 1.99E-50 |
| KCNA5 | -2.25405 | 0.035077 | 7.32E-52 | 2.44E-50 |
| STX1A | 3.124838 | 3.987072 | 7.88E-52 | 2.62E-50 |
| IGSF9 | 3.276593 | 4.876701 | 8.48E-52 | 2.82E-50 |
| C1orf198 | -1.18918 | 7.093631 | 1.27E-51 | 4.20E-50 |
| FERMT1 | 3.248936 | 5.014613 | 1.31E-51 | 4.34E-50 |
| GADD45B | -1.73446 | 6.373912 | 1.35E-51 | 4.46E-50 |
| HYAL2 | -1.20934 | 6.226882 | 1.38E-51 | 4.56E-50 |
| PIP5K1B | -2.20822 | 3.651798 | 1.57E-51 | 5.16E-50 |
| RNF122 | -1.3145 | 3.637999 | 2.15E-51 | 7.08E-50 |
| DENND2A | -1.73014 | 3.597523 | 2.30E-51 | 7.54E-50 |
| CDC45 | 3.226824 | 3.458857 | 2.38E-51 | 7.78E-50 |
| POLQ | 3.333301 | 2.777345 | 2.50E-51 | 8.18E-50 |
| NLN | 1.434153 | 5.379754 | 3.72E-51 | 1.21E-49 |
| ANKS1A | -1.05453 | 6.119459 | 4.11E-51 | 1.34E-49 |
| CENPA | 3.654138 | 2.760378 | 4.86E-51 | 1.58E-49 |
| CXCL2 | -2.37597 | 5.834595 | 5.23E-51 | 1.70E-49 |
| SHANK3 | -1.40125 | 4.951581 | 5.42E-51 | 1.75E-49 |
| NDC80 | 3.156512 | 3.646056 | 5.97E-51 | 1.93E-49 |
| ARL13B | -1.04061 | 3.91144 | 7.23E-51 | 2.33E-49 |
| FFAR4 | -2.35615 | 2.102885 | 7.28E-51 | 2.34E-49 |
| SLC1A1 | -2.16797 | 4.875304 | 8.12E-51 | 2.61E-49 |
| KCNT2 | -2.47369 | 1.735547 | 8.52E-51 | 2.73E-49 |
| MKI67 | 3.140184 | 6.323554 | 8.89E-51 | 2.85E-49 |
| EPHA10 | 3.656622 | 3.642805 | 1.28E-50 | 4.10E-49 |
| MAP3K3 | -1.01657 | 5.426261 | 1.31E-50 | 4.18E-49 |
| SMIM41 | -2.15891 | -2.14812 | 1.52E-50 | 4.85E-49 |
| OLFML1 | -1.60889 | 3.668047 | 1.55E-50 | 4.93E-49 |
| SIDT2 | -1.06039 | 6.163426 | 1.74E-50 | 5.53E-49 |
| TTK | 3.324946 | 3.466835 | 1.85E-50 | 5.87E-49 |
| EPN3 | 3.104565 | 4.113592 | 2.03E-50 | 6.42E-49 |
| MAFF | -1.47615 | 5.190892 | 2.09E-50 | 6.61E-49 |
| MSTO1 | 1.558681 | 3.804717 | 2.33E-50 | 7.34E-49 |
| LMOD1 | -1.79358 | 4.191875 | 2.41E-50 | 7.60E-49 |
| ANO2 | -2.07951 | 0.242481 | 2.42E-50 | 7.62E-49 |
| ABCA12 | 5.410522 | 3.804222 | 2.54E-50 | 7.97E-49 |
| MRC1 | -2.2857 | 7.169032 | 2.64E-50 | 8.28E-49 |
| HMMR | 3.048063 | 3.835632 | 2.78E-50 | 8.68E-49 |
| SYNE3 | -1.68447 | 3.719441 | 2.83E-50 | 8.84E-49 |
| IQANK1 | 2.281154 | 5.398732 | 3.37E-50 | 1.05E-48 |
| RASAL1 | 4.047645 | 3.540949 | 3.94E-50 | 1.22E-48 |
| KNTC1 | 2.158891 | 4.984794 | 4.01E-50 | 1.24E-48 |
| PLPP2 | 2.44576 | 6.5099 | 4.24E-50 | 1.31E-48 |
| NCAPH | 2.996589 | 3.974903 | 4.52E-50 | 1.40E-48 |
| PCDHGB7 | -1.73391 | 2.133804 | 6.21E-50 | 1.92E-48 |
| MT1M | -2.74917 | 2.538695 | 6.51E-50 | 2.01E-48 |
| DIXDC1 | -1.23509 | 4.343243 | 6.65E-50 | 2.05E-48 |
| RHBDL2 | 2.71432 | 3.237428 | 6.70E-50 | 2.06E-48 |
| EGR2 | -1.8367 | 4.302348 | 7.90E-50 | 2.42E-48 |
| AURKB | 3.473401 | 3.878026 | 8.53E-50 | 2.61E-48 |
| FOXM1 | 3.379983 | 4.936402 | 1.24E-49 | 3.79E-48 |
| PLSCR4 | -1.40128 | 4.906833 | 1.44E-49 | 4.39E-48 |
| PDIA4 | 1.801519 | 8.979291 | 1.58E-49 | 4.82E-48 |
| ACKR4 | -2.36266 | 1.033191 | 1.59E-49 | 4.82E-48 |
| GPT2 | 3.444515 | 6.240494 | 1.67E-49 | 5.07E-48 |
| HMGB3 | 3.534072 | 8.248932 | 2.09E-49 | 6.33E-48 |
| LILRA5 | -2.0099 | 2.31531 | 2.14E-49 | 6.48E-48 |
| ZFYVE9 | -1.25292 | 4.64683 | 2.18E-49 | 6.59E-48 |
| C1QTNF2 | -1.84368 | 0.954459 | 2.21E-49 | 6.68E-48 |
| CHAF1B | 1.970256 | 3.721539 | 2.40E-49 | 7.24E-48 |
| PTPRH | 5.207541 | 4.113458 | 2.55E-49 | 7.66E-48 |
| PKMYT1 | 3.000977 | 3.392749 | 2.58E-49 | 7.75E-48 |
| CELSR3 | 3.424169 | 4.185608 | 3.68E-49 | 1.10E-47 |
| ZYG11A | 5.426304 | 1.780823 | 4.40E-49 | 1.31E-47 |
| KRT79 | -3.0899 | -1.11514 | 7.40E-49 | 2.21E-47 |
| C1orf131 | 1.044641 | 3.863971 | 7.40E-49 | 2.21E-47 |
| C1QTNF7 | -2.38321 | 2.545288 | 7.92E-49 | 2.35E-47 |
| CDCA2 | 2.990337 | 2.668195 | 9.27E-49 | 2.75E-47 |
| MDGA1 | -1.85077 | 3.089121 | 1.21E-48 | 3.58E-47 |
| NCAPG | 3.235345 | 3.802915 | 1.31E-48 | 3.88E-47 |
| FAM136A | 1.206662 | 5.555207 | 1.37E-48 | 4.05E-47 |
| JUND | -1.42264 | 7.397155 | 1.52E-48 | 4.48E-47 |
| PHKA1 | 1.678985 | 4.739921 | 1.57E-48 | 4.63E-47 |
| GAB1 | -1.30988 | 4.945527 | 1.67E-48 | 4.89E-47 |
| PHACTR2 | -1.43826 | 5.605337 | 1.71E-48 | 5.01E-47 |
| SCN7A | -2.33824 | 4.743896 | 1.96E-48 | 5.74E-47 |
| PSAT1 | 3.52656 | 4.882734 | 2.03E-48 | 5.95E-47 |
| KDELR3 | 2.263315 | 5.781192 | 2.30E-48 | 6.72E-47 |
| GIMAP4 | -1.45091 | 5.315244 | 2.34E-48 | 6.81E-47 |
| NCF2 | -1.6499 | 5.852777 | 2.36E-48 | 6.86E-47 |
| PRKCH | -1.03114 | 5.200439 | 2.46E-48 | 7.13E-47 |
| CHEK1 | 2.636642 | 4.052788 | 2.48E-48 | 7.18E-47 |
| CRABP2 | 5.610122 | 7.568218 | 2.74E-48 | 7.93E-47 |
| RFX2 | -1.61905 | 4.222758 | 2.75E-48 | 7.94E-47 |
| KNOP1 | 1.146969 | 3.982838 | 2.75E-48 | 7.94E-47 |
| C13orf46 | -2.69212 | 1.885481 | 2.80E-48 | 8.07E-47 |
| CTIF | -1.17628 | 5.133113 | 2.92E-48 | 8.40E-47 |
| GPBAR1 | -1.83409 | 0.537136 | 3.06E-48 | 8.79E-47 |
| HELLS | 2.428163 | 4.032839 | 3.13E-48 | 8.98E-47 |
| MTMR10 | -1.08573 | 4.739978 | 3.40E-48 | 9.73E-47 |
| FRMD4A | -1.26877 | 3.776224 | 3.73E-48 | 1.07E-46 |
| ALOX5AP | -1.91716 | 5.887855 | 3.83E-48 | 1.09E-46 |
| GPR4 | -1.5425 | 3.114653 | 4.24E-48 | 1.21E-46 |
| SLC6A13 | -2.61524 | -0.889 | 4.63E-48 | 1.32E-46 |
| OTX1 | 3.351225 | 2.677967 | 4.68E-48 | 1.33E-46 |
| EME1 | 2.725858 | 1.689748 | 5.94E-48 | 1.68E-46 |
| HACD4 | -1.40624 | 4.728908 | 6.07E-48 | 1.72E-46 |
| HROB | 2.764635 | 2.80191 | 6.30E-48 | 1.78E-46 |
| CAB39L | -1.36046 | 3.990397 | 7.34E-48 | 2.07E-46 |
| CDCA5 | 2.9991 | 4.575997 | 8.93E-48 | 2.52E-46 |
| RDM1 | 3.604383 | -0.08527 | 1.02E-47 | 2.87E-46 |
| JAML | -1.74186 | 5.07891 | 1.06E-47 | 2.97E-46 |
| KIF15 | 2.715151 | 3.113537 | 1.19E-47 | 3.35E-46 |
| KAT2A | 1.735101 | 6.055757 | 1.22E-47 | 3.42E-46 |
| MYH10 | -1.47592 | 7.074805 | 1.53E-47 | 4.29E-46 |
| GPER1 | -2.18126 | 2.330416 | 1.55E-47 | 4.31E-46 |
| WFIKKN2 | -2.99191 | -1.42834 | 1.80E-47 | 5.01E-46 |
| MDK | 3.097052 | 8.344962 | 1.85E-47 | 5.14E-46 |
| LOXHD1 | -2.15546 | -0.37878 | 2.01E-47 | 5.55E-46 |
| MCM4 | 2.245798 | 6.558788 | 2.01E-47 | 5.55E-46 |
| GREM1 | 5.055582 | 6.01025 | 2.01E-47 | 5.55E-46 |
| DNA2 | 2.266149 | 3.236671 | 2.11E-47 | 5.83E-46 |
| ESPL1 | 3.157921 | 3.980808 | 2.21E-47 | 6.10E-46 |
| PID1 | -1.91483 | 4.44316 | 2.43E-47 | 6.68E-46 |
| NME1 | 2.222683 | 4.496262 | 2.82E-47 | 7.75E-46 |
| KNL1 | 2.655378 | 3.504307 | 2.84E-47 | 7.78E-46 |
| MFAP3L | -2.04761 | 2.499268 | 3.06E-47 | 8.39E-46 |
| PADI4 | -2.49499 | -0.97218 | 3.11E-47 | 8.52E-46 |
| CFL2 | -1.36402 | 5.188509 | 3.16E-47 | 8.65E-46 |
| CCNA2 | 2.969366 | 4.237188 | 3.29E-47 | 8.97E-46 |
| DHH | -1.92934 | -0.83601 | 3.31E-47 | 9.02E-46 |
| FAM111B | 2.769439 | 3.664972 | 3.50E-47 | 9.53E-46 |
| CENPI | 2.771366 | 2.51568 | 3.62E-47 | 9.83E-46 |
| SVEP1 | -2.05301 | 5.057926 | 3.64E-47 | 9.88E-46 |
| ARHGEF6 | -1.39219 | 5.032395 | 4.19E-47 | 1.13E-45 |
| NECTIN4 | 2.375208 | 6.137562 | 4.26E-47 | 1.15E-45 |
| TMEM273 | -1.54502 | 3.920766 | 4.56E-47 | 1.23E-45 |
| GINS2 | 2.879808 | 3.66325 | 5.67E-47 | 1.53E-45 |
| GPRIN1 | 2.726705 | 3.323245 | 6.39E-47 | 1.72E-45 |
| DEPP1 | -1.77966 | 7.303863 | 7.42E-47 | 2.00E-45 |
| SPC24 | 2.726921 | 3.178295 | 8.16E-47 | 2.19E-45 |
| TMCO2 | -2.56324 | -3.66404 | 8.80E-47 | 2.36E-45 |
| PAFAH1B3 | 2.293524 | 4.781911 | 9.03E-47 | 2.42E-45 |
| TICRR | 2.90658 | 2.465888 | 1.20E-46 | 3.21E-45 |
| CCNF | 1.91235 | 4.062569 | 1.21E-46 | 3.22E-45 |
| FXYD1 | -2.5333 | -3.38188 | 1.34E-46 | 3.56E-45 |
| PCLAF | 2.686179 | 2.735403 | 1.34E-46 | 3.57E-45 |
| RADIL | -2.2031 | 2.093805 | 1.76E-46 | 4.67E-45 |
| EPB41L2 | -1.37804 | 5.818287 | 1.95E-46 | 5.16E-45 |
| TNFRSF21 | 2.001327 | 7.721967 | 2.14E-46 | 5.66E-45 |
| CRYAB | -1.92064 | 3.946677 | 2.40E-46 | 6.35E-45 |
| TMEM182 | 1.57558 | 3.199908 | 2.42E-46 | 6.38E-45 |
| EDN1 | -1.98825 | 5.172667 | 2.45E-46 | 6.45E-45 |
| SORBS1 | -1.54858 | 5.00398 | 2.53E-46 | 6.66E-45 |
| SLC35F2 | 1.900445 | 5.492302 | 2.60E-46 | 6.84E-45 |
| AQP4 | -2.94106 | 7.306101 | 2.90E-46 | 7.61E-45 |
| UNC5CL | 3.110653 | 4.016597 | 3.34E-46 | 8.75E-45 |
| BCHE | -2.43841 | 2.235347 | 3.54E-46 | 9.27E-45 |
| VAMP2 | -1.13716 | 5.920412 | 3.72E-46 | 9.72E-45 |
| NTN4 | -1.6254 | 6.131457 | 4.15E-46 | 1.08E-44 |
| SLC11A1 | -1.7976 | 5.51266 | 4.20E-46 | 1.09E-44 |
| GJA5 | -1.65563 | 4.70059 | 5.01E-46 | 1.30E-44 |
| MYO7A | 2.016363 | 4.204534 | 6.07E-46 | 1.58E-44 |
| TONSL | 2.157749 | 4.535226 | 6.25E-46 | 1.62E-44 |
| FOLR3 | -3.27431 | 0.261628 | 6.48E-46 | 1.68E-44 |
| CLSPN | 2.765199 | 3.512151 | 7.70E-46 | 1.99E-44 |
| RETN | -2.93074 | 1.900926 | 7.94E-46 | 2.05E-44 |
| ANGPTL1 | -2.27092 | 2.135322 | 7.98E-46 | 2.06E-44 |
| LIMCH1 | -1.57349 | 7.651898 | 8.29E-46 | 2.13E-44 |
| ANGPTL5 | -2.43124 | -1.69649 | 9.35E-46 | 2.40E-44 |
| ORC1 | 2.777502 | 2.952904 | 9.61E-46 | 2.47E-44 |
| CYBRD1 | -1.73687 | 7.532932 | 9.97E-46 | 2.56E-44 |
| PDE5A | -1.57272 | 4.684392 | 1.02E-45 | 2.61E-44 |
| NEIL3 | 4.29977 | 2.37905 | 1.29E-45 | 3.29E-44 |
| FANCA | 1.990269 | 3.90576 | 1.29E-45 | 3.30E-44 |
| PTH1R | -1.8786 | 1.787541 | 1.31E-45 | 3.33E-44 |
| ASF1B | 2.398832 | 4.306138 | 1.35E-45 | 3.44E-44 |
| ADCYAP1R1 | -2.10957 | 0.090554 | 1.48E-45 | 3.75E-44 |
| POLE2 | 2.377959 | 2.756433 | 1.49E-45 | 3.77E-44 |
| E2F3 | 1.39665 | 4.979653 | 1.53E-45 | 3.89E-44 |
| H2BC5 | 2.65834 | 4.477961 | 1.96E-45 | 4.95E-44 |
| PCYOX1 | -1.0907 | 7.300814 | 1.98E-45 | 4.99E-44 |
| ESCO2 | 2.656992 | 2.486604 | 2.85E-45 | 7.19E-44 |
| GHR | -1.99133 | 1.799512 | 2.85E-45 | 7.19E-44 |
| CACNA1S | -3.30877 | -1.61479 | 2.88E-45 | 7.24E-44 |
| ARSH | 5.306996 | -0.49453 | 3.08E-45 | 7.74E-44 |
| C1orf74 | 1.297813 | 2.388514 | 3.12E-45 | 7.84E-44 |
| RGS17 | 3.775334 | 3.662883 | 3.62E-45 | 9.07E-44 |
| SLC2A1 | 3.535086 | 7.536193 | 3.87E-45 | 9.68E-44 |
| NDRG4 | -2.0072 | 3.732737 | 4.42E-45 | 1.11E-43 |
| MYBL2 | 3.841605 | 5.758865 | 5.63E-45 | 1.40E-43 |
| ATIC | 1.250487 | 6.709814 | 5.70E-45 | 1.42E-43 |
| ANXA3 | -1.85582 | 6.308951 | 5.78E-45 | 1.44E-43 |
| KHDC4 | 1.516278 | 5.886828 | 6.09E-45 | 1.51E-43 |
| EPM2A | -1.12598 | 2.433587 | 6.51E-45 | 1.61E-43 |
| ICAM2 | -1.37395 | 3.150998 | 8.05E-45 | 2.00E-43 |
| FRY | -1.47238 | 5.371579 | 8.72E-45 | 2.16E-43 |
| FPR1 | -1.9148 | 4.304924 | 8.82E-45 | 2.18E-43 |
| HS6ST2 | 3.722858 | 5.553702 | 8.92E-45 | 2.20E-43 |
| RAB26 | 3.663702 | 2.02892 | 9.68E-45 | 2.39E-43 |
| FBP1 | -1.6524 | 6.133453 | 1.36E-44 | 3.36E-43 |
| FZD4 | -1.56803 | 5.316646 | 1.38E-44 | 3.38E-43 |
| RFLNB | -1.32793 | 4.499067 | 1.53E-44 | 3.75E-43 |
| CENPU | 2.388155 | 4.075968 | 1.76E-44 | 4.30E-43 |
| SRGAP2C | -1.10276 | 2.770774 | 1.85E-44 | 4.53E-43 |
| SOX4 | 1.699371 | 7.968368 | 2.60E-44 | 6.33E-43 |
| CDT1 | 2.786077 | 4.122338 | 2.75E-44 | 6.69E-43 |
| GJB2 | 4.588876 | 5.286607 | 3.23E-44 | 7.85E-43 |
| EPCAM | 1.64665 | 8.946017 | 3.30E-44 | 8.00E-43 |
| DONSON | 1.489709 | 3.802529 | 3.39E-44 | 8.23E-43 |
| ARHGAP24 | -1.34389 | 3.759911 | 4.32E-44 | 1.05E-42 |
| STARD9 | -1.6984 | 3.768948 | 4.49E-44 | 1.09E-42 |
| AGMAT | 2.616565 | 1.981227 | 6.19E-44 | 1.50E-42 |
| TSACC | 3.102105 | -0.10268 | 6.36E-44 | 1.53E-42 |
| NARF | 1.296462 | 6.268706 | 6.39E-44 | 1.54E-42 |
| KIFC1 | 2.776551 | 4.721306 | 6.40E-44 | 1.54E-42 |
| ECT2 | 2.200024 | 5.792972 | 6.93E-44 | 1.66E-42 |
| NEXN | -1.50772 | 3.924452 | 7.50E-44 | 1.80E-42 |
| SKA1 | 3.053977 | 2.626594 | 7.61E-44 | 1.82E-42 |
| F2RL3 | -1.85175 | 3.020764 | 8.01E-44 | 1.92E-42 |
| LILRA1 | -1.62254 | 0.79923 | 8.23E-44 | 1.97E-42 |
| TRAP1 | 1.192505 | 5.570156 | 8.27E-44 | 1.97E-42 |
| TRAIP | 1.842092 | 2.458467 | 8.42E-44 | 2.01E-42 |
| KCNIP1 | -2.08684 | -0.7901 | 8.64E-44 | 2.06E-42 |
| C11orf80 | 1.456644 | 4.427499 | 8.67E-44 | 2.06E-42 |
| BUB1 | 2.670314 | 4.682812 | 8.92E-44 | 2.12E-42 |
| SALL4 | 3.445064 | 2.242379 | 8.94E-44 | 2.12E-42 |
| PLEK2 | 2.746327 | 4.341015 | 9.26E-44 | 2.19E-42 |
| KLF10 | -1.10463 | 6.489855 | 9.53E-44 | 2.25E-42 |
| ACKR1 | -2.3557 | 4.295761 | 1.04E-43 | 2.45E-42 |
| CYP1A2 | -3.80667 | -0.80723 | 1.07E-43 | 2.51E-42 |
| TK1 | 2.676499 | 5.984504 | 1.12E-43 | 2.64E-42 |
| ONECUT1 | 6.687085 | 1.07579 | 1.31E-43 | 3.09E-42 |
| SYNJ2 | 1.568113 | 5.004795 | 1.36E-43 | 3.19E-42 |
| SLC25A10 | 2.306307 | 3.116444 | 1.74E-43 | 4.08E-42 |
| SYNPO2 | -1.77429 | 4.610233 | 2.17E-43 | 5.09E-42 |
| EXD1 | -2.37423 | -2.13827 | 2.19E-43 | 5.13E-42 |
| SOX18 | -1.61567 | 3.119852 | 2.28E-43 | 5.32E-42 |
| CSTF2 | 1.082731 | 4.655315 | 2.32E-43 | 5.42E-42 |
| MNX1 | 4.315391 | 1.47068 | 2.56E-43 | 5.97E-42 |
| ROR1 | -1.78058 | 3.730851 | 2.57E-43 | 5.97E-42 |
| OVCH2 | -2.93662 | -0.90808 | 2.58E-43 | 5.99E-42 |
| C1QTNF6 | 2.316824 | 4.861044 | 2.72E-43 | 6.30E-42 |
| KIF23 | 2.613805 | 4.252645 | 3.31E-43 | 7.67E-42 |
| PRDM11 | -1.15912 | 3.62386 | 3.49E-43 | 8.07E-42 |
| CCDC69 | -1.47433 | 5.922296 | 3.50E-43 | 8.07E-42 |
| FAM13C | -1.69625 | 1.633905 | 3.64E-43 | 8.39E-42 |
| FLAD1 | 1.430124 | 5.8448 | 3.71E-43 | 8.55E-42 |
| PBK | 3.408939 | 3.337383 | 4.15E-43 | 9.55E-42 |
| ARHGEF16 | 1.800197 | 5.373169 | 4.34E-43 | 9.97E-42 |
| SIRPD | -2.11882 | -2.77034 | 5.59E-43 | 1.28E-41 |
| AURKA | 2.668115 | 4.641862 | 6.59E-43 | 1.51E-41 |
| CENPE | 2.687924 | 3.740432 | 6.74E-43 | 1.54E-41 |
| CFP | -1.73632 | -0.61211 | 6.79E-43 | 1.55E-41 |
| FANCD2 | 1.574779 | 3.812079 | 7.25E-43 | 1.65E-41 |
| BLM | 2.174534 | 2.931407 | 7.42E-43 | 1.69E-41 |
| SPP1 | 4.820515 | 9.168387 | 8.47E-43 | 1.93E-41 |
| SHROOM4 | -1.69584 | 5.060185 | 1.14E-42 | 2.58E-41 |
| CCNE1 | 3.313497 | 3.275296 | 1.23E-42 | 2.79E-41 |
| KCNAB1 | -1.59229 | 2.011426 | 1.23E-42 | 2.79E-41 |
| MMP11 | 5.28968 | 7.215871 | 1.24E-42 | 2.80E-41 |
| SLC5A9 | -2.46784 | 1.803997 | 1.26E-42 | 2.83E-41 |
| GALNT18 | -1.39536 | 5.189121 | 1.28E-42 | 2.88E-41 |
| PTGER4 | -1.56223 | 4.242899 | 1.30E-42 | 2.92E-41 |
| GGCT | 1.740512 | 4.883392 | 1.42E-42 | 3.19E-41 |
| FGF2 | -1.98472 | 2.462727 | 1.49E-42 | 3.36E-41 |
| GRHL3 | 3.537235 | 1.926117 | 1.56E-42 | 3.51E-41 |
| UTRN | -1.33936 | 7.196517 | 1.69E-42 | 3.79E-41 |
| PDGFB | -1.4636 | 4.905783 | 1.87E-42 | 4.18E-41 |
| MARCKSL1 | 1.944249 | 7.741609 | 2.09E-42 | 4.68E-41 |
| GMFG | -1.45615 | 4.849907 | 2.24E-42 | 5.00E-41 |
| FANCI | 1.927075 | 4.74855 | 2.34E-42 | 5.23E-41 |
| CAV3 | -2.98628 | -2.17534 | 2.53E-42 | 5.64E-41 |
| TNS2 | -1.37513 | 6.556046 | 2.74E-42 | 6.09E-41 |
| MME | -2.41967 | 4.752236 | 2.99E-42 | 6.65E-41 |
| SHCBP1 | 2.315151 | 3.604842 | 3.30E-42 | 7.33E-41 |
| NTM | -2.06587 | 4.551033 | 3.40E-42 | 7.53E-41 |
| FAM167B | -1.40704 | 2.439101 | 3.47E-42 | 7.69E-41 |
| GALNT7 | 1.769455 | 6.20663 | 4.01E-42 | 8.85E-41 |
| REM1 | -1.60297 | 0.336079 | 4.12E-42 | 9.09E-41 |
| KISS1R | 6.172289 | 0.97551 | 4.21E-42 | 9.27E-41 |
| KLF2 | -1.73696 | 5.110301 | 4.88E-42 | 1.07E-40 |
| TFR2 | 3.119866 | 1.985218 | 4.98E-42 | 1.09E-40 |
| SBSPON | -2.24492 | 2.672133 | 5.73E-42 | 1.26E-40 |
| PIMREG | 3.234546 | 2.791453 | 6.33E-42 | 1.39E-40 |
| GUCY1A2 | -1.90043 | 4.19422 | 7.19E-42 | 1.57E-40 |
| ATP10B | 5.521215 | 4.113292 | 9.10E-42 | 1.99E-40 |
| SGCA | -1.98088 | 2.552904 | 1.16E-41 | 2.53E-40 |
| SLC7A7 | -1.42329 | 5.547624 | 1.16E-41 | 2.53E-40 |
| HSPB3 | -2.49022 | -1.55221 | 1.23E-41 | 2.68E-40 |
| FBLN5 | -1.76643 | 6.074579 | 1.30E-41 | 2.82E-40 |
| PROS1 | -1.4872 | 5.86971 | 1.37E-41 | 2.97E-40 |
| ERICH4 | -2.23009 | -2.94254 | 1.40E-41 | 3.04E-40 |
| NEBL | -1.59016 | 6.390381 | 1.63E-41 | 3.53E-40 |
| SOCS2 | -1.9361 | 4.983249 | 1.94E-41 | 4.20E-40 |
| LMO7 | -1.3675 | 8.187502 | 2.20E-41 | 4.75E-40 |
| AFF3 | -2.3247 | 3.616105 | 2.34E-41 | 5.05E-40 |
| TLR4 | -1.56618 | 4.934967 | 2.61E-41 | 5.62E-40 |
| PRICKLE2 | -1.35049 | 4.108324 | 2.63E-41 | 5.66E-40 |
| DBNDD1 | 2.011306 | 5.094158 | 2.83E-41 | 6.08E-40 |
| ERO1A | 2.094836 | 7.798564 | 3.30E-41 | 7.07E-40 |
| TIMELESS | 1.745207 | 5.611015 | 3.33E-41 | 7.13E-40 |
| UTP25 | 1.058135 | 5.18899 | 3.34E-41 | 7.15E-40 |
| HMOX1 | -1.68474 | 6.426252 | 3.59E-41 | 7.66E-40 |
| MAD2L1 | 2.607377 | 4.39119 | 3.61E-41 | 7.71E-40 |
| HOXA5 | -1.58202 | 2.813926 | 3.80E-41 | 8.11E-40 |
| XYLB | 1.647492 | 2.8185 | 4.09E-41 | 8.70E-40 |
| MTARC2 | -1.43868 | 4.443292 | 4.70E-41 | 9.99E-40 |
| RIPOR1 | -1.1824 | 5.58944 | 4.80E-41 | 1.02E-39 |
| SLC24A4 | -1.95969 | 0.824402 | 5.27E-41 | 1.12E-39 |
| ADTRP | -2.07742 | 2.426679 | 5.50E-41 | 1.17E-39 |
| SFXN4 | 1.413383 | 4.788033 | 6.52E-41 | 1.38E-39 |
| KL | -2.27448 | 2.607569 | 7.06E-41 | 1.49E-39 |
| ARRB1 | -1.32119 | 6.288081 | 7.11E-41 | 1.50E-39 |
| WFDC1 | -1.8303 | 2.879139 | 7.74E-41 | 1.63E-39 |
| ATP1A2 | -2.25634 | 1.792641 | 8.71E-41 | 1.83E-39 |
| PITX2 | 8.127026 | 2.986943 | 8.81E-41 | 1.85E-39 |
| ADAMTSL4 | -1.78062 | 4.850886 | 8.84E-41 | 1.85E-39 |
| CYP27A1 | -1.69691 | 6.487878 | 1.01E-40 | 2.11E-39 |
| SLC12A4 | -1.00776 | 5.858345 | 1.07E-40 | 2.24E-39 |
| IL33 | -2.05699 | 5.325915 | 1.09E-40 | 2.27E-39 |
| RALGPS2 | 1.685174 | 5.192787 | 1.16E-40 | 2.42E-39 |
| CAMP | -2.61678 | -0.08219 | 1.29E-40 | 2.70E-39 |
| TMEM150B | -1.79932 | 2.177536 | 1.40E-40 | 2.92E-39 |
| P3H4 | 2.097825 | 5.436794 | 1.76E-40 | 3.66E-39 |
| CLDN18 | -3.5221 | 7.764634 | 2.06E-40 | 4.29E-39 |
| CCT3 | 1.382673 | 8.454787 | 2.07E-40 | 4.30E-39 |
| SMAD7 | -1.07111 | 5.325978 | 2.40E-40 | 4.97E-39 |
| PCDH15 | -2.99361 | 0.266093 | 2.57E-40 | 5.31E-39 |
| MOCS1 | -1.34365 | 4.004334 | 2.57E-40 | 5.31E-39 |
| STYK1 | 2.625039 | 3.390346 | 2.66E-40 | 5.49E-39 |
| TFAP2A | 3.775137 | 3.768809 | 2.99E-40 | 6.16E-39 |
| TFAP4 | 1.268049 | 4.02144 | 3.02E-40 | 6.22E-39 |
| PROM2 | 2.639197 | 6.528542 | 3.14E-40 | 6.47E-39 |
| SAMD10 | 1.770717 | 3.753681 | 3.45E-40 | 7.09E-39 |
| SELPLG | -1.43394 | 5.62134 | 4.22E-40 | 8.67E-39 |
| SERPING1 | -1.37249 | 8.590961 | 4.38E-40 | 8.99E-39 |
| COL11A1 | 6.268016 | 6.220513 | 4.42E-40 | 9.06E-39 |
| SLC24A2 | 5.087664 | 0.427903 | 4.81E-40 | 9.85E-39 |
| FIGNL1 | 1.608589 | 4.235195 | 4.99E-40 | 1.02E-38 |
| CD300LF | -1.74245 | 3.651557 | 5.15E-40 | 1.05E-38 |
| LIPN | -2.42093 | -0.82138 | 5.35E-40 | 1.09E-38 |
| NIM1K | -2.22289 | 1.234762 | 5.59E-40 | 1.14E-38 |
| DAO | -2.37207 | -2.9781 | 5.68E-40 | 1.16E-38 |
| ZFP36 | -1.79222 | 8.429344 | 5.81E-40 | 1.18E-38 |
| E2F2 | 2.369865 | 2.895449 | 5.97E-40 | 1.21E-38 |
| STOM | -1.19332 | 8.400052 | 6.71E-40 | 1.36E-38 |
| PLEKHO2 | -1.14195 | 5.836141 | 7.08E-40 | 1.43E-38 |
| EXOC3L1 | -1.23957 | 2.652206 | 7.17E-40 | 1.45E-38 |
| FCGR3B | -2.33102 | 2.01498 | 7.42E-40 | 1.50E-38 |
| TTC28 | -1.2209 | 4.872889 | 7.52E-40 | 1.52E-38 |
| IL1RL1 | -2.84164 | 3.788802 | 7.95E-40 | 1.60E-38 |
| ZEB1 | -1.31368 | 4.904833 | 7.97E-40 | 1.61E-38 |
| UBASH3B | -1.60123 | 4.231732 | 8.14E-40 | 1.64E-38 |
| C5orf34 | 2.074622 | 1.763313 | 8.86E-40 | 1.78E-38 |
| PAK1 | 1.198117 | 6.490303 | 9.93E-40 | 1.99E-38 |
| ARHGAP18 | -1.1211 | 6.033659 | 1.02E-39 | 2.04E-38 |
| CDKN3 | 2.912967 | 3.284552 | 1.03E-39 | 2.06E-38 |
| MAST1 | 3.279367 | 1.242696 | 1.07E-39 | 2.15E-38 |
| ADGRL4 | -1.25615 | 4.411075 | 1.09E-39 | 2.18E-38 |
| ODAM | -3.10259 | -0.40261 | 1.13E-39 | 2.26E-38 |
| CCDC150 | 2.646212 | 1.426206 | 1.22E-39 | 2.44E-38 |
| MRAS | -1.09465 | 4.71729 | 1.23E-39 | 2.45E-38 |
| CCL24 | -2.43571 | 2.001702 | 1.33E-39 | 2.65E-38 |
| PDLIM1 | -1.04274 | 7.433901 | 1.38E-39 | 2.74E-38 |
| XDH | 4.0932 | 4.621022 | 1.57E-39 | 3.12E-38 |
| TRAF4 | 1.353568 | 6.579512 | 1.66E-39 | 3.29E-38 |
| RHBG | 4.602965 | 0.222906 | 1.86E-39 | 3.69E-38 |
| CBX8 | 1.377317 | 3.755015 | 1.87E-39 | 3.71E-38 |
| SPI1 | -1.55869 | 5.739151 | 2.10E-39 | 4.15E-38 |
| ABCC3 | 2.567828 | 8.030761 | 2.13E-39 | 4.22E-38 |
| GCNT3 | 5.174253 | 5.763745 | 2.19E-39 | 4.32E-38 |
| LMNB1 | 1.907747 | 5.602213 | 2.52E-39 | 4.97E-38 |
| SPATS2 | 1.241643 | 5.190515 | 2.52E-39 | 4.97E-38 |
| ZBTB47 | -1.06298 | 3.974894 | 2.55E-39 | 5.01E-38 |
| PTTG1 | 2.36376 | 4.664414 | 2.65E-39 | 5.19E-38 |
| CDK1 | 2.48381 | 5.185104 | 2.66E-39 | 5.21E-38 |
| SLC50A1 | 1.796543 | 6.865308 | 2.75E-39 | 5.38E-38 |
| XPR1 | 1.929413 | 7.467803 | 2.91E-39 | 5.69E-38 |
| RAD51 | 2.227959 | 2.858906 | 2.95E-39 | 5.76E-38 |
| CRIM1 | -1.31075 | 6.677376 | 2.96E-39 | 5.77E-38 |
| DCAF13 | 1.376715 | 5.911943 | 3.04E-39 | 5.93E-38 |
| CYRIA | -1.36657 | 4.444675 | 3.05E-39 | 5.94E-38 |
| SLC39A11 | 1.357774 | 6.227399 | 3.57E-39 | 6.95E-38 |
| PPP1R14D | 6.01807 | 3.840444 | 3.63E-39 | 7.06E-38 |
| BCL2L15 | 3.487422 | 4.177723 | 3.90E-39 | 7.57E-38 |
| KIF22 | 1.356993 | 5.165813 | 4.19E-39 | 8.13E-38 |
| CENPK | 2.270404 | 2.899442 | 4.32E-39 | 8.38E-38 |
| DKC1 | 1.157334 | 6.331234 | 4.40E-39 | 8.52E-38 |
| RAD54B | 1.956949 | 0.955453 | 4.57E-39 | 8.84E-38 |
| ENTPD8 | 4.686483 | 2.41248 | 4.63E-39 | 8.93E-38 |
| KPNA2 | 1.98412 | 6.830132 | 5.05E-39 | 9.74E-38 |
| PRSS35 | -2.20411 | 0.098584 | 5.06E-39 | 9.75E-38 |
| ITIH5 | -2.06223 | 4.754408 | 5.79E-39 | 1.11E-37 |
| MANF | 1.407291 | 6.51369 | 5.80E-39 | 1.11E-37 |
| CDCA7 | 2.957891 | 4.808097 | 6.01E-39 | 1.15E-37 |
| PTGIR | -1.3262 | 2.651162 | 6.47E-39 | 1.24E-37 |
| INAVA | 2.224351 | 5.520724 | 6.80E-39 | 1.30E-37 |
| EIF2AK1 | 1.02275 | 7.994525 | 6.81E-39 | 1.30E-37 |
| ADAMTS14 | 2.685685 | 2.979683 | 6.86E-39 | 1.31E-37 |
| ZFP69B | 1.711796 | 1.410138 | 6.88E-39 | 1.31E-37 |
| INTS8 | 1.202207 | 5.450049 | 8.23E-39 | 1.57E-37 |
| APBB1 | -1.34044 | 4.738434 | 8.43E-39 | 1.60E-37 |
| PCDHGC3 | -1.5241 | 4.149704 | 9.40E-39 | 1.79E-37 |
| P2RY6 | 3.024995 | 4.28721 | 1.04E-38 | 1.98E-37 |
| BMP8A | 2.80018 | 3.582035 | 1.24E-38 | 2.34E-37 |
| SYT7 | 3.475957 | 6.219734 | 1.36E-38 | 2.57E-37 |
| LBX2 | 2.149878 | 0.593137 | 1.46E-38 | 2.77E-37 |
| C11orf96 | -1.805 | 4.734892 | 1.50E-38 | 2.83E-37 |
| HNF4G | 3.534044 | 3.243518 | 1.59E-38 | 3.00E-37 |
| SYT12 | 5.486565 | 4.997841 | 1.68E-38 | 3.17E-37 |
| ITPKA | 5.197092 | 3.895914 | 1.72E-38 | 3.23E-37 |
| SERINC2 | 2.070549 | 7.734829 | 1.82E-38 | 3.42E-37 |
| RAB40A | -1.64324 | 0.444477 | 1.93E-38 | 3.63E-37 |
| CYP24A1 | 6.730049 | 6.647857 | 1.95E-38 | 3.66E-37 |
| ITPRID2 | -1.11796 | 7.191958 | 1.97E-38 | 3.69E-37 |
| PLK4 | 2.074892 | 3.247731 | 2.15E-38 | 4.03E-37 |
| RHBDL1 | 3.222631 | 2.498452 | 2.28E-38 | 4.27E-37 |
| CHRDL1 | -2.26698 | 4.921128 | 2.32E-38 | 4.32E-37 |
| DNAH14 | 2.112192 | 3.651783 | 2.35E-38 | 4.38E-37 |
| GJA4 | -1.42832 | 3.475484 | 2.55E-38 | 4.75E-37 |
| PGM2L1 | 1.911123 | 5.544642 | 2.67E-38 | 4.98E-37 |
| GINS4 | 2.453459 | 2.578821 | 2.70E-38 | 5.01E-37 |
| NCAPG2 | 1.817348 | 5.031058 | 3.08E-38 | 5.71E-37 |
| SPC25 | 2.391556 | 2.36488 | 3.13E-38 | 5.80E-37 |
| CHRM2 | -3.37139 | -1.03132 | 3.93E-38 | 7.26E-37 |
| RAB11FIP1 | -1.43234 | 7.135524 | 3.96E-38 | 7.32E-37 |
| TMOD1 | -1.72063 | 2.140135 | 4.15E-38 | 7.65E-37 |
| BZW2 | 1.34098 | 6.357295 | 4.16E-38 | 7.67E-37 |
| HEMGN | -2.3767 | -3.01383 | 4.31E-38 | 7.92E-37 |
| RCCD1 | 1.375522 | 3.782369 | 4.32E-38 | 7.93E-37 |
| ABCG1 | -1.37152 | 5.729623 | 4.99E-38 | 9.17E-37 |
| TERT | 5.508324 | 0.180374 | 5.08E-38 | 9.31E-37 |
| ANKRD29 | -2.13057 | 4.698338 | 5.17E-38 | 9.47E-37 |
| PCOLCE2 | -2.32316 | 3.492163 | 5.21E-38 | 9.54E-37 |
| DMBX1 | 6.269152 | 1.322772 | 5.65E-38 | 1.03E-36 |
| ID4 | -1.92357 | 5.029306 | 6.00E-38 | 1.10E-36 |
| PDK1 | 1.739666 | 5.110606 | 6.45E-38 | 1.18E-36 |
| TRAPPC3L | -2.04301 | -2.93678 | 6.59E-38 | 1.20E-36 |
| SLCO2A1 | -1.7587 | 6.503507 | 7.57E-38 | 1.38E-36 |
| ARMH2 | -3.03939 | -3.45464 | 7.76E-38 | 1.41E-36 |
| PODXL2 | 3.275284 | 5.738889 | 9.53E-38 | 1.73E-36 |
| RRAS | -1.31845 | 5.917697 | 9.76E-38 | 1.77E-36 |
| PILRA | -1.48844 | 3.869352 | 9.89E-38 | 1.79E-36 |
| PAPSS2 | -1.44209 | 6.746476 | 1.02E-37 | 1.86E-36 |
| ARHGAP44 | -1.61695 | 4.597354 | 1.06E-37 | 1.92E-36 |
| APOBR | -1.57851 | 4.467853 | 1.08E-37 | 1.94E-36 |
| CRTAC1 | -2.55424 | 5.4809 | 1.09E-37 | 1.97E-36 |
| TNS3 | -1.07374 | 7.59703 | 1.16E-37 | 2.10E-36 |
| CRY2 | -1.13282 | 5.865343 | 1.28E-37 | 2.31E-36 |
| INKA1 | -1.45781 | 1.122489 | 1.32E-37 | 2.37E-36 |
| MRPL3 | 1.084001 | 6.438991 | 1.32E-37 | 2.38E-36 |
| CDC25A | 2.374526 | 2.510978 | 1.41E-37 | 2.54E-36 |
| JPT2 | 1.128382 | 7.37141 | 1.45E-37 | 2.61E-36 |
| KCNN4 | 3.270223 | 5.828402 | 1.69E-37 | 3.03E-36 |
| WNT3 | 2.106497 | 3.51738 | 1.71E-37 | 3.06E-36 |
| KDM5B | 1.132963 | 7.050024 | 1.88E-37 | 3.35E-36 |
| GNL3 | 1.1308 | 6.474127 | 1.88E-37 | 3.35E-36 |
| EGR1 | -1.84279 | 8.268263 | 2.32E-37 | 4.13E-36 |
| FEN1 | 1.610213 | 5.054316 | 2.42E-37 | 4.29E-36 |
| FRMD4B | -1.07993 | 5.311287 | 2.59E-37 | 4.60E-36 |
| POLR2H | 1.205643 | 5.798666 | 2.71E-37 | 4.80E-36 |
| MYEOV | 6.314138 | 4.445632 | 2.88E-37 | 5.10E-36 |
| SRL | -1.79674 | 0.089965 | 2.98E-37 | 5.26E-36 |
| NR4A3 | -2.22944 | 4.449437 | 3.07E-37 | 5.42E-36 |
| NPR3 | -1.75707 | 4.804777 | 3.09E-37 | 5.45E-36 |
| TFB2M | 1.215085 | 4.69083 | 3.10E-37 | 5.46E-36 |
| TDRKH | 1.421556 | 5.040087 | 3.11E-37 | 5.47E-36 |
| PCARE | -2.94399 | -0.85032 | 3.45E-37 | 6.07E-36 |
| VWC2 | -2.47025 | -1.78301 | 3.88E-37 | 6.82E-36 |
| EEF1AKMT4 | 2.117221 | 2.453874 | 4.19E-37 | 7.35E-36 |
| PTPRM | -1.37013 | 6.065737 | 4.29E-37 | 7.52E-36 |
| HHIP | -2.88517 | 4.723699 | 4.39E-37 | 7.69E-36 |
| FKBP11 | 1.770784 | 5.317044 | 4.44E-37 | 7.77E-36 |
| SH3BP5 | -1.36283 | 3.446137 | 4.75E-37 | 8.30E-36 |
| RBP2 | -2.82316 | -0.19202 | 5.25E-37 | 9.17E-36 |
| GMPPA | 1.046499 | 5.85126 | 7.24E-37 | 1.26E-35 |
| LYPD1 | 3.538026 | 1.398403 | 8.99E-37 | 1.57E-35 |
| CABYR | 4.625074 | 3.243175 | 9.12E-37 | 1.59E-35 |
| RFC4 | 1.81332 | 4.30805 | 9.19E-37 | 1.60E-35 |
| STAC | -2.05382 | 3.4237 | 9.55E-37 | 1.66E-35 |
| UBL3 | -1.05897 | 6.500946 | 1.05E-36 | 1.83E-35 |
| ABCA3 | -2.0787 | 8.522205 | 1.06E-36 | 1.83E-35 |
| SAMHD1 | -1.16027 | 7.199268 | 1.11E-36 | 1.92E-35 |
| PGM5 | -1.8491 | 3.820956 | 1.27E-36 | 2.20E-35 |
| POLG2 | 1.322384 | 3.855915 | 1.34E-36 | 2.32E-35 |
| MMACHC | 1.076915 | 3.330292 | 1.55E-36 | 2.68E-35 |
| B4GALNT4 | 4.785371 | 3.610885 | 1.55E-36 | 2.68E-35 |
| TPBG | 1.78957 | 5.40292 | 1.68E-36 | 2.89E-35 |
| TNFSF12 | -1.1725 | 4.434455 | 1.70E-36 | 2.93E-35 |
| CCIN | -1.94759 | -1.48579 | 1.87E-36 | 3.22E-35 |
| ZC3HAV1L | 1.615401 | 2.521426 | 2.05E-36 | 3.52E-35 |
| STK39 | 1.568958 | 6.084986 | 2.21E-36 | 3.79E-35 |
| ATAD2 | 1.883258 | 5.701637 | 2.31E-36 | 3.96E-35 |
| JPT1 | 1.692519 | 7.359444 | 2.32E-36 | 3.97E-35 |
| ZNF239 | 1.708413 | 2.724074 | 2.36E-36 | 4.04E-35 |
| CDH13 | -1.8027 | 2.909892 | 2.47E-36 | 4.21E-35 |
| DCSTAMP | -2.1515 | 1.521084 | 2.69E-36 | 4.58E-35 |
| IL17D | -1.54367 | 0.889858 | 3.08E-36 | 5.24E-35 |
| PLEKHA8 | 1.336995 | 4.443157 | 3.94E-36 | 6.71E-35 |
| SGPL1 | 1.028621 | 6.923626 | 4.26E-36 | 7.24E-35 |
| TBX5 | -1.46462 | 3.47094 | 4.27E-36 | 7.25E-35 |
| TMPRSS11E | 6.722869 | 3.820984 | 4.59E-36 | 7.79E-35 |
| ACACB | -1.29648 | 4.155454 | 4.85E-36 | 8.21E-35 |
| GALNT14 | 3.703139 | 4.447657 | 5.51E-36 | 9.33E-35 |
| CBX3 | 1.085743 | 7.800747 | 6.12E-36 | 1.04E-34 |
| IL1RL2 | 2.311474 | 1.862346 | 6.34E-36 | 1.07E-34 |
| KAT2B | -1.09519 | 4.813875 | 6.42E-36 | 1.08E-34 |
| PUS7 | 1.302202 | 4.617339 | 6.42E-36 | 1.08E-34 |
| TRIP13 | 2.677825 | 4.528681 | 6.70E-36 | 1.13E-34 |
| TARS2 | 1.074569 | 5.446977 | 6.90E-36 | 1.16E-34 |
| SLC27A3 | -1.28703 | 5.440862 | 8.55E-36 | 1.44E-34 |
| LEPR | -1.81483 | 4.884282 | 9.26E-36 | 1.56E-34 |
| PREX2 | -1.78631 | 3.605195 | 9.27E-36 | 1.56E-34 |
| IL1RAPL2 | 6.129456 | -0.81795 | 9.52E-36 | 1.60E-34 |
| DAB2IP | -1.04918 | 6.304993 | 1.03E-35 | 1.73E-34 |
| CCRL2 | -1.51433 | 3.359125 | 1.06E-35 | 1.78E-34 |
| ART4 | -2.20075 | 1.085919 | 1.10E-35 | 1.85E-34 |
| STRA6 | 4.489353 | 4.046761 | 1.16E-35 | 1.93E-34 |
| DCST1 | 2.755729 | -0.01432 | 1.28E-35 | 2.14E-34 |
| SUV39H2 | 1.33603 | 3.301764 | 1.30E-35 | 2.17E-34 |
| SEMA6D | -2.02411 | 3.125409 | 1.30E-35 | 2.17E-34 |
| DNAJC22 | 3.479417 | 3.462293 | 1.35E-35 | 2.26E-34 |
| CCN2 | -1.57643 | 7.962914 | 1.52E-35 | 2.53E-34 |
| WDHD1 | 1.814146 | 4.103393 | 1.60E-35 | 2.66E-34 |
| PREX1 | -1.20669 | 5.937504 | 1.82E-35 | 3.03E-34 |
| CCN1 | -1.59541 | 7.920915 | 1.83E-35 | 3.03E-34 |
| PARPBP | 2.183117 | 2.28054 | 1.85E-35 | 3.07E-34 |
| CYGB | -1.22215 | 3.789092 | 1.87E-35 | 3.10E-34 |
| TIMM8A | 1.222494 | 3.102295 | 1.99E-35 | 3.29E-34 |
| RPP40 | 1.585133 | 2.491223 | 2.15E-35 | 3.56E-34 |
| MSI2 | 1.225722 | 6.45628 | 2.38E-35 | 3.93E-34 |
| BLACAT1 | 2.884971 | 3.086792 | 2.49E-35 | 4.11E-34 |
| PMM2 | 1.248438 | 3.874475 | 2.57E-35 | 4.24E-34 |
| NES | -1.56037 | 6.04852 | 2.64E-35 | 4.35E-34 |
| HSPD1 | 1.327056 | 8.488306 | 2.80E-35 | 4.61E-34 |
| CENPL | 1.439943 | 3.305473 | 2.94E-35 | 4.83E-34 |
| ZNF485 | 1.264746 | 1.828347 | 3.05E-35 | 5.00E-34 |
| MINAR1 | 2.046307 | 0.930815 | 3.09E-35 | 5.07E-34 |
| HPSE2 | -2.3669 | 0.698256 | 3.12E-35 | 5.11E-34 |
| EFNA2 | 5.858449 | 0.558668 | 4.05E-35 | 6.63E-34 |
| B4GALT2 | 1.230956 | 6.082725 | 4.37E-35 | 7.15E-34 |
| HMGA1 | 2.305806 | 8.130881 | 4.38E-35 | 7.15E-34 |
| CARD14 | 3.479345 | 3.25799 | 4.42E-35 | 7.21E-34 |
| CCNP | 4.32557 | 2.143834 | 4.43E-35 | 7.22E-34 |
| KCTD12 | -1.29687 | 7.296696 | 4.49E-35 | 7.30E-34 |
| PDCD2L | 1.579025 | 2.25175 | 5.17E-35 | 8.40E-34 |
| SLC15A3 | -1.34723 | 5.812588 | 5.40E-35 | 8.77E-34 |
| PDE1B | -1.5411 | 2.378416 | 5.44E-35 | 8.83E-34 |
| ADGRE5 | -1.25573 | 6.999777 | 5.56E-35 | 9.01E-34 |
| TMEM79 | 1.376087 | 3.281138 | 6.02E-35 | 9.75E-34 |
| EFEMP1 | -1.5731 | 7.234756 | 6.55E-35 | 1.06E-33 |
| F12 | 2.768647 | 1.863366 | 6.66E-35 | 1.08E-33 |
| HSH2D | 1.471191 | 4.552138 | 6.69E-35 | 1.08E-33 |
| CILP2 | 3.530571 | 3.708595 | 6.86E-35 | 1.11E-33 |
| PTGES | 3.006517 | 5.52918 | 7.02E-35 | 1.13E-33 |
| AQP11 | 1.572041 | 1.05788 | 7.32E-35 | 1.18E-33 |
| CGREF1 | 4.271644 | 2.801308 | 7.61E-35 | 1.22E-33 |
| GPR89A | 1.084826 | 2.324575 | 7.93E-35 | 1.27E-33 |
| MTBP | 1.736779 | 2.746042 | 8.09E-35 | 1.30E-33 |
| NATD1 | -1.1635 | 4.290929 | 8.92E-35 | 1.43E-33 |
| GPA33 | -2.69154 | 2.241915 | 9.25E-35 | 1.48E-33 |
| SLCO5A1 | 3.237384 | 2.215881 | 1.01E-34 | 1.61E-33 |
| GPC3 | -2.13166 | 5.556173 | 1.03E-34 | 1.65E-33 |
| FLVCR2 | -1.24572 | 4.14329 | 1.04E-34 | 1.66E-33 |
| C2CD4A | 4.140628 | 4.112405 | 1.05E-34 | 1.67E-33 |
| ARHGAP11A | 2.09431 | 3.787164 | 1.10E-34 | 1.75E-33 |
| MCM6 | 1.492627 | 5.864395 | 1.10E-34 | 1.75E-33 |
| XPO5 | 1.066243 | 5.89689 | 1.11E-34 | 1.76E-33 |
| PRR11 | 2.262069 | 4.476221 | 1.12E-34 | 1.78E-33 |
| PLXNB3 | 3.406226 | 4.383742 | 1.27E-34 | 2.02E-33 |
| C1orf115 | -1.56703 | 4.947632 | 1.29E-34 | 2.05E-33 |
| CPNE7 | 3.242424 | 3.09391 | 1.31E-34 | 2.08E-33 |
| PSMG3 | 1.581755 | 5.461667 | 1.33E-34 | 2.11E-33 |
| PC | 1.750234 | 5.375569 | 1.55E-34 | 2.45E-33 |
| HTR3A | 5.889207 | 3.193908 | 1.58E-34 | 2.49E-33 |
| NPM3 | 1.716606 | 4.604009 | 1.66E-34 | 2.62E-33 |
| SIX4 | 1.947609 | 4.275921 | 1.71E-34 | 2.69E-33 |
| BPHL | 1.32031 | 3.9122 | 1.72E-34 | 2.71E-33 |
| WDR62 | 2.381007 | 3.772544 | 1.87E-34 | 2.95E-33 |
| DEFA3 | -3.47956 | -2.99295 | 1.96E-34 | 3.07E-33 |
| PALD1 | -1.23187 | 4.383005 | 2.03E-34 | 3.19E-33 |
| HSF2BP | 2.272078 | 0.049316 | 2.09E-34 | 3.29E-33 |
| LIFR | -1.56889 | 6.538122 | 2.20E-34 | 3.45E-33 |
| RUSC1 | 1.204589 | 5.848224 | 2.29E-34 | 3.60E-33 |
| AUNIP | 2.365242 | 1.55264 | 2.35E-34 | 3.68E-33 |
| TPPP3 | -2.18093 | 6.078927 | 2.37E-34 | 3.70E-33 |
| SOCS3 | -1.49008 | 7.679407 | 2.45E-34 | 3.84E-33 |
| AVL9 | 1.128295 | 6.412681 | 2.64E-34 | 4.12E-33 |
| TACC3 | 1.699767 | 5.775183 | 2.68E-34 | 4.18E-33 |
| MRM1 | 1.303788 | 3.245075 | 2.73E-34 | 4.25E-33 |
| GATA6 | -1.69384 | 3.920917 | 2.91E-34 | 4.54E-33 |
| PRKCQ | -1.55443 | 2.702422 | 3.07E-34 | 4.77E-33 |
| ACP6 | 1.334061 | 4.883237 | 3.20E-34 | 4.98E-33 |
| HK3 | -1.74279 | 4.416016 | 3.62E-34 | 5.62E-33 |
| ADAM12 | 3.123466 | 4.913405 | 3.67E-34 | 5.69E-33 |
| SNORC | 2.523912 | 0.87837 | 3.69E-34 | 5.72E-33 |
| HSD17B6 | -2.24057 | 5.162487 | 3.85E-34 | 5.96E-33 |
| SPDL1 | 1.333369 | 3.687851 | 3.86E-34 | 5.97E-33 |
| FLT4 | -1.3159 | 4.64819 | 3.92E-34 | 6.06E-33 |
| MARVELD3 | 1.501768 | 4.070998 | 4.23E-34 | 6.53E-33 |
| SCIMP | -1.5068 | 3.063406 | 4.36E-34 | 6.73E-33 |
| EIF4E3 | -1.06976 | 4.96137 | 4.44E-34 | 6.85E-33 |
| PHOSPHO1 | -1.64193 | 0.134278 | 4.62E-34 | 7.11E-33 |
| SORBS3 | -1.13098 | 6.200826 | 4.92E-34 | 7.57E-33 |
| NMU | 4.612223 | 2.544994 | 5.24E-34 | 8.05E-33 |
| SNCA | -1.57803 | 1.223044 | 5.55E-34 | 8.52E-33 |
| SPRED3 | 2.507746 | 1.894344 | 5.58E-34 | 8.55E-33 |
| SLC5A6 | 1.184755 | 5.247437 | 5.58E-34 | 8.55E-33 |
| ACOXL | -1.5441 | 3.383678 | 6.19E-34 | 9.47E-33 |
| PMP22 | -1.15065 | 6.363018 | 6.56E-34 | 1.00E-32 |
| CCDC54 | -2.13738 | -3.41703 | 6.90E-34 | 1.05E-32 |
| EEF1A2 | 6.393366 | 6.064333 | 7.48E-34 | 1.14E-32 |
| NEDD9 | -1.54807 | 7.541913 | 7.75E-34 | 1.18E-32 |
| TRIM59 | 1.54882 | 3.377642 | 8.21E-34 | 1.25E-32 |
| FILIP1 | -1.7777 | 3.123297 | 9.10E-34 | 1.38E-32 |
| LILRB3 | -1.33117 | 3.672001 | 9.45E-34 | 1.44E-32 |
| GATA1 | -1.71448 | -1.67349 | 9.57E-34 | 1.45E-32 |
| TRPM8 | 7.041899 | 3.402028 | 1.01E-33 | 1.54E-32 |
| NAT9 | 1.10149 | 5.339878 | 1.05E-33 | 1.59E-32 |
| IRAK1 | 1.241773 | 7.548012 | 1.05E-33 | 1.59E-32 |
| FHL2 | 2.369731 | 6.091403 | 1.13E-33 | 1.71E-32 |
| DARS2 | 1.262019 | 5.260453 | 1.14E-33 | 1.72E-32 |
| PLCE1 | -1.34738 | 4.474304 | 1.20E-33 | 1.81E-32 |
| DNAJC12 | 4.288125 | 4.743719 | 1.25E-33 | 1.88E-32 |
| CYP27B1 | 2.423482 | 3.039983 | 1.30E-33 | 1.96E-32 |
| NFATC1 | -1.12088 | 4.2668 | 1.44E-33 | 2.16E-32 |
| CTDSPL | -1.00291 | 6.037736 | 1.48E-33 | 2.22E-32 |
| SHC3 | -1.79737 | 3.691382 | 1.52E-33 | 2.29E-32 |
| ANKRD22 | 2.816668 | 4.798844 | 1.59E-33 | 2.38E-32 |
| PITX1 | 4.559253 | 4.031975 | 1.60E-33 | 2.40E-32 |
| ANO7 | 1.90566 | 1.841566 | 1.61E-33 | 2.42E-32 |
| KRT80 | 2.475672 | 6.038105 | 1.82E-33 | 2.72E-32 |
| C2CD4D | 2.587857 | 1.058423 | 1.94E-33 | 2.90E-32 |
| KLF17 | -1.88783 | -2.07941 | 2.09E-33 | 3.13E-32 |
| AC068831.6 | 2.153426 | 0.278105 | 2.10E-33 | 3.13E-32 |
| NDRG2 | -1.46726 | 5.669337 | 2.19E-33 | 3.26E-32 |
| ALG1L | 3.265233 | 2.248534 | 2.24E-33 | 3.33E-32 |
| FAM124A | -1.32612 | 1.676086 | 2.37E-33 | 3.52E-32 |
| BCL9 | 1.338852 | 5.743472 | 2.44E-33 | 3.62E-32 |
| PIF1 | 2.393205 | 2.13215 | 2.44E-33 | 3.63E-32 |
| MOGAT1 | -2.52438 | -2.91886 | 2.49E-33 | 3.69E-32 |
| BTK | -1.36465 | 4.164156 | 3.03E-33 | 4.49E-32 |
| CHTF18 | 1.84418 | 4.170395 | 3.08E-33 | 4.55E-32 |
| WFDC3 | 3.963644 | 3.541904 | 3.09E-33 | 4.57E-32 |
| BOP1 | 1.739311 | 6.028106 | 3.17E-33 | 4.68E-32 |
| CHRNA5 | 3.658718 | 1.414157 | 3.32E-33 | 4.91E-32 |
| FEZF1 | 5.593529 | 1.69421 | 3.33E-33 | 4.91E-32 |
| GAPDH | 1.699267 | 10.35702 | 3.39E-33 | 5.01E-32 |
| RSPO2 | -2.59053 | 1.363535 | 3.53E-33 | 5.21E-32 |
| LMOD3 | -1.23178 | -0.32371 | 3.90E-33 | 5.74E-32 |
| PKP3 | 1.596656 | 6.44615 | 3.97E-33 | 5.85E-32 |
| FAM83D | 2.298303 | 3.949875 | 4.19E-33 | 6.16E-32 |
| ST14 | 1.507028 | 8.350851 | 4.33E-33 | 6.35E-32 |
| CA3 | -2.07694 | 1.751941 | 4.79E-33 | 7.02E-32 |
| RBBP8NL | 2.121995 | 2.453465 | 4.99E-33 | 7.31E-32 |
| TLR8 | -1.74682 | 3.422763 | 5.00E-33 | 7.31E-32 |
| TMEM63C | 4.036836 | 3.608727 | 5.31E-33 | 7.77E-32 |
| LARGE2 | 2.496427 | 5.215242 | 5.37E-33 | 7.85E-32 |
| GFPT1 | 1.192431 | 7.673271 | 5.44E-33 | 7.94E-32 |
| FAM241A | -1.08608 | 4.032372 | 5.80E-33 | 8.46E-32 |
| CCN4 | 2.267044 | 4.472473 | 6.54E-33 | 9.54E-32 |
| SLC7A5 | 2.710762 | 7.055611 | 6.58E-33 | 9.59E-32 |
| TLCD1 | 1.789812 | 4.355663 | 6.91E-33 | 1.01E-31 |
| TOX2 | -1.52976 | 3.228903 | 7.35E-33 | 1.07E-31 |
| SECISBP2L | -1.33587 | 6.673029 | 7.37E-33 | 1.07E-31 |
| YBX2 | 4.769985 | 2.608798 | 7.50E-33 | 1.09E-31 |
| KLHL33 | -1.69387 | -1.16119 | 8.44E-33 | 1.22E-31 |
| PDE8B | -1.34119 | 1.357766 | 8.62E-33 | 1.25E-31 |
| N4BP2L1 | -1.16393 | 4.045162 | 8.94E-33 | 1.29E-31 |
| MIS18A | 1.278876 | 3.771509 | 9.19E-33 | 1.33E-31 |
| SCAI | -1.09232 | 4.069049 | 9.53E-33 | 1.38E-31 |
| LAD1 | 1.985328 | 6.670421 | 9.73E-33 | 1.40E-31 |
| FGFR2 | -1.75073 | 5.128007 | 1.05E-32 | 1.51E-31 |
| PFKP | 2.15717 | 7.188595 | 1.10E-32 | 1.58E-31 |
| FABP5 | -1.74041 | 3.598062 | 1.11E-32 | 1.60E-31 |
| RANBP3L | -1.85639 | 1.08458 | 1.18E-32 | 1.69E-31 |
| GPR19 | 2.449778 | 0.333415 | 1.19E-32 | 1.71E-31 |
| MROH6 | 2.485739 | 5.53069 | 1.21E-32 | 1.74E-31 |
| SFTPA1 | -2.79825 | 12.14133 | 1.23E-32 | 1.77E-31 |
| COLEC12 | -1.6634 | 5.862332 | 1.31E-32 | 1.88E-31 |
| ABCA9 | -1.63723 | 2.040225 | 1.40E-32 | 2.00E-31 |
| VARS1 | 1.203948 | 7.128494 | 1.51E-32 | 2.16E-31 |
| B3GNTL1 | 1.232965 | 3.100461 | 1.52E-32 | 2.18E-31 |
| ALG1L2 | 2.040488 | -0.32896 | 1.60E-32 | 2.29E-31 |
| WDR12 | 1.030449 | 4.935088 | 1.74E-32 | 2.49E-31 |
| SPDEF | 3.293648 | 5.43887 | 1.76E-32 | 2.51E-31 |
| P4HA3 | 2.277619 | 2.903718 | 1.80E-32 | 2.56E-31 |
| PRICKLE1 | -1.42427 | 2.455788 | 1.86E-32 | 2.64E-31 |
| ZCCHC24 | -1.01204 | 4.961484 | 1.92E-32 | 2.72E-31 |
| ARID5A | -1.05215 | 4.960288 | 1.96E-32 | 2.78E-31 |
| CEACAM21 | -1.59512 | 1.910361 | 2.01E-32 | 2.85E-31 |
| GYG2 | 2.266782 | 3.737511 | 2.01E-32 | 2.85E-31 |
| NUP155 | 1.359947 | 5.908886 | 2.12E-32 | 3.00E-31 |
| CP | 3.528063 | 8.491535 | 2.25E-32 | 3.18E-31 |
| SEC14L6 | -2.06133 | 3.263809 | 2.35E-32 | 3.32E-31 |
| SCN8A | 2.982918 | 2.40028 | 2.47E-32 | 3.48E-31 |
| IKBKE | 1.189036 | 4.278206 | 2.65E-32 | 3.74E-31 |
| CBX4 | 1.104819 | 5.528134 | 2.77E-32 | 3.90E-31 |
| GGTA1 | -1.34015 | 3.289152 | 2.92E-32 | 4.11E-31 |
| BDNF | -2.31944 | 1.434352 | 2.96E-32 | 4.17E-31 |
| ARHGAP40 | 3.703307 | 3.488767 | 3.00E-32 | 4.21E-31 |
| DUS1L | 1.235254 | 6.846939 | 3.04E-32 | 4.27E-31 |
| CCDC173 | -2.03659 | 1.048698 | 3.08E-32 | 4.32E-31 |
| ABCB6 | 2.434867 | -0.01613 | 3.27E-32 | 4.58E-31 |
| CARD16 | -1.28366 | 3.304106 | 3.30E-32 | 4.62E-31 |
| CACNA2D2 | -2.33985 | 6.302457 | 3.36E-32 | 4.71E-31 |
| SELENOP | -1.52873 | 5.97762 | 3.60E-32 | 5.04E-31 |
| P2RY14 | -1.42321 | 2.31743 | 3.63E-32 | 5.08E-31 |
| RASSF2 | -1.20385 | 5.494242 | 3.97E-32 | 5.53E-31 |
| TBX15 | 3.770326 | 3.508163 | 4.02E-32 | 5.60E-31 |
| GARS1 | 1.112342 | 7.139971 | 4.25E-32 | 5.92E-31 |
| ZNF692 | 1.658412 | 4.979544 | 4.31E-32 | 6.00E-31 |
| ADAM8 | 2.162322 | 6.164104 | 4.39E-32 | 6.10E-31 |
| PPARGC1B | -1.3825 | 2.852502 | 4.40E-32 | 6.11E-31 |
| CEACAM1 | 2.084237 | 5.731297 | 4.82E-32 | 6.68E-31 |
| AKR7A3 | 5.363839 | 3.421484 | 4.89E-32 | 6.78E-31 |
| FBXO32 | 2.139607 | 6.126592 | 5.03E-32 | 6.96E-31 |
| ADCK5 | 1.687813 | 3.87711 | 5.36E-32 | 7.41E-31 |
| RSPO4 | -2.26631 | 1.824362 | 5.39E-32 | 7.45E-31 |
| MRGBP | 1.176985 | 4.72032 | 5.55E-32 | 7.67E-31 |
| SHMT2 | 1.52025 | 6.782553 | 5.73E-32 | 7.91E-31 |
| DTL | 1.884488 | 4.100468 | 6.08E-32 | 8.39E-31 |
| VASH1 | -1.0943 | 4.329022 | 6.30E-32 | 8.68E-31 |
| STEAP1 | 2.846504 | 4.659759 | 6.54E-32 | 9.01E-31 |
| ADGRF4 | 4.495067 | 2.682991 | 7.13E-32 | 9.81E-31 |
| RHNO1 | 1.013607 | 5.127107 | 7.28E-32 | 1.00E-30 |
| BRIX1 | 1.278995 | 5.392268 | 7.31E-32 | 1.00E-30 |
| PLPP4 | 4.07937 | 1.429192 | 7.56E-32 | 1.04E-30 |
| RTN1 | -1.57432 | 3.211471 | 7.59E-32 | 1.04E-30 |
| HYLS1 | 1.316826 | 2.839663 | 8.37E-32 | 1.14E-30 |
| COL1A1 | 2.921893 | 11.59295 | 8.37E-32 | 1.14E-30 |
| SBK1 | 2.583796 | 5.043122 | 8.41E-32 | 1.15E-30 |
| HPCAL1 | -1.06286 | 6.618943 | 9.10E-32 | 1.24E-30 |
| CCDC169 | 2.938072 | 0.526646 | 9.26E-32 | 1.26E-30 |
| MEFV | -1.62723 | 1.029315 | 9.69E-32 | 1.32E-30 |
| SYN2 | -2.26201 | 0.319726 | 9.94E-32 | 1.35E-30 |
| AVPR2 | -1.93058 | 0.107547 | 1.15E-31 | 1.57E-30 |
| LAMC3 | -1.64582 | 4.543931 | 1.23E-31 | 1.68E-30 |
| CLCN2 | 1.333552 | 2.669771 | 1.27E-31 | 1.73E-30 |
| POC1A | 1.599015 | 3.350891 | 1.41E-31 | 1.91E-30 |
| RBMS3 | -1.49737 | 4.482513 | 1.56E-31 | 2.11E-30 |
| LRRC8C | -1.08767 | 4.593084 | 1.56E-31 | 2.11E-30 |
| E2F7 | 2.763137 | 2.248922 | 1.57E-31 | 2.12E-30 |
| PRR19 | 2.204723 | 0.938554 | 1.62E-31 | 2.18E-30 |
| LDHA | 1.369343 | 9.798964 | 1.66E-31 | 2.23E-30 |
| HEATR1 | 1.105237 | 5.622386 | 1.66E-31 | 2.23E-30 |
| TCEAL2 | -2.47135 | 0.935805 | 1.86E-31 | 2.50E-30 |
| GPR182 | -1.55916 | -0.94488 | 1.88E-31 | 2.52E-30 |
| ATAD5 | 1.644527 | 3.166238 | 2.06E-31 | 2.77E-30 |
| SNRPE | 1.138797 | 5.78401 | 2.08E-31 | 2.80E-30 |
| RAD51AP1 | 2.093612 | 3.391135 | 2.10E-31 | 2.82E-30 |
| GFRA2 | -1.69169 | 0.783624 | 2.13E-31 | 2.86E-30 |
| PHLDA2 | 2.342596 | 4.958317 | 2.20E-31 | 2.94E-30 |
| ETS1 | -1.1528 | 7.079896 | 2.20E-31 | 2.95E-30 |
| SLC52A2 | 1.469449 | 6.224828 | 2.25E-31 | 3.01E-30 |
| SLC25A39 | 1.238116 | 7.563248 | 2.28E-31 | 3.05E-30 |
| BARX2 | 3.921596 | 3.588778 | 2.28E-31 | 3.05E-30 |
| CASKIN1 | 3.641399 | 0.189402 | 2.30E-31 | 3.06E-30 |
| SIRPA | -1.22947 | 6.183396 | 2.31E-31 | 3.07E-30 |
| LHFPL5 | 2.014129 | 1.609752 | 2.31E-31 | 3.07E-30 |
| MMP13 | 6.153447 | 5.102368 | 2.47E-31 | 3.29E-30 |
| HHIPL2 | 6.057217 | 3.345964 | 2.59E-31 | 3.44E-30 |
| C11orf86 | 7.980657 | 1.661716 | 2.72E-31 | 3.61E-30 |
| ZNF217 | 1.372938 | 6.537312 | 2.78E-31 | 3.69E-30 |
| SERTAD1 | -1.21227 | 5.002636 | 2.83E-31 | 3.75E-30 |
| SPRING1 | -1.01951 | 6.876733 | 3.03E-31 | 4.01E-30 |
| NPNT | -1.76667 | 6.699559 | 3.09E-31 | 4.09E-30 |
| GNG11 | -1.6835 | 5.68051 | 3.36E-31 | 4.45E-30 |
| PTRH2 | 1.024019 | 4.678007 | 3.52E-31 | 4.65E-30 |
| NTRK3 | -1.86074 | 1.275192 | 3.76E-31 | 4.96E-30 |
| CLK2 | 1.053141 | 5.721324 | 3.81E-31 | 5.02E-30 |
| C1QA | -1.54371 | 8.030613 | 4.01E-31 | 5.28E-30 |
| LPXN | -1.07132 | 4.90627 | 4.26E-31 | 5.60E-30 |
| SYNDIG1L | -2.33284 | 0.525453 | 4.65E-31 | 6.10E-30 |
| CD33 | -1.42131 | 2.927402 | 4.66E-31 | 6.11E-30 |
| FUT3 | 2.343939 | 4.981533 | 4.70E-31 | 6.16E-30 |
| APOL3 | -1.2904 | 5.518859 | 5.03E-31 | 6.59E-30 |
| TBRG4 | 1.108106 | 6.092956 | 5.13E-31 | 6.73E-30 |
| CCDC81 | -1.93877 | 0.710461 | 5.37E-31 | 7.03E-30 |
| DCN | -1.45195 | 8.989451 | 5.91E-31 | 7.73E-30 |
| HPDL | 3.442218 | 1.162615 | 6.38E-31 | 8.33E-30 |
| SGMS2 | -1.29295 | 6.410671 | 6.51E-31 | 8.49E-30 |
| NRG3 | -2.381 | -0.63987 | 6.71E-31 | 8.74E-30 |
| PODXL | -1.06125 | 6.599217 | 7.02E-31 | 9.14E-30 |
| DBF4 | 1.446625 | 3.930931 | 7.50E-31 | 9.75E-30 |
| AP000944.5 | -1.74251 | -2.22354 | 7.64E-31 | 9.94E-30 |
| ZNF138 | 1.210016 | 3.46329 | 7.75E-31 | 1.01E-29 |
| ZNF695 | 4.344993 | -0.07495 | 7.83E-31 | 1.02E-29 |
| MYH11 | -1.79327 | 6.870072 | 8.15E-31 | 1.06E-29 |
| PPFIBP1 | -1.09069 | 5.849437 | 9.29E-31 | 1.20E-29 |
| PLAC1 | 4.832516 | -0.01217 | 1.04E-30 | 1.34E-29 |
| TMTC4 | 1.229475 | 4.960101 | 1.04E-30 | 1.34E-29 |
| MAP3K8 | -1.10665 | 4.614931 | 1.10E-30 | 1.42E-29 |
| ATF3 | -1.74049 | 6.24372 | 1.19E-30 | 1.53E-29 |
| KCNMB3 | 1.818735 | 1.467239 | 1.24E-30 | 1.59E-29 |
| TSPAN12 | -1.26566 | 5.753705 | 1.27E-30 | 1.64E-29 |
| CHEK2 | 1.515597 | 3.952777 | 1.38E-30 | 1.77E-29 |
| KCNK3 | -2.17389 | 4.391346 | 1.40E-30 | 1.80E-29 |
| DUOXA1 | -1.97233 | 4.061689 | 1.54E-30 | 1.97E-29 |
| HSPE1 | 1.385845 | 4.489315 | 1.56E-30 | 2.00E-29 |
| FBXO43 | 2.357071 | -0.14567 | 1.63E-30 | 2.08E-29 |
| VMP1 | 1.38164 | 8.230166 | 1.66E-30 | 2.12E-29 |
| EGR3 | -1.71998 | 3.498484 | 1.72E-30 | 2.19E-29 |
| PRAME | 7.538266 | 4.676056 | 1.78E-30 | 2.27E-29 |
| HCN3 | 1.790635 | 2.59162 | 1.78E-30 | 2.27E-29 |
| CA9 | 5.646181 | 4.366307 | 1.80E-30 | 2.30E-29 |
| MMP1 | 5.277439 | 6.639887 | 1.86E-30 | 2.37E-29 |
| MCM2 | 1.984891 | 4.869997 | 1.88E-30 | 2.39E-29 |
| CHPF2 | 1.013429 | 6.598179 | 1.89E-30 | 2.41E-29 |
| SEC14L3 | -3.04473 | 0.370259 | 1.98E-30 | 2.51E-29 |
| TMEM132A | 2.056724 | 5.859858 | 2.07E-30 | 2.63E-29 |
| BEAN1 | 2.891001 | 3.247714 | 2.10E-30 | 2.66E-29 |
| KDELR2 | 1.019823 | 8.617675 | 2.13E-30 | 2.70E-29 |
| THBS2 | 2.955305 | 6.654937 | 2.31E-30 | 2.93E-29 |
| ILF2 | 1.090292 | 7.952538 | 2.43E-30 | 3.08E-29 |
| SELENOI | 1.311819 | 5.928845 | 2.48E-30 | 3.14E-29 |
| RAB19 | 1.530712 | 2.458016 | 2.49E-30 | 3.15E-29 |
| SLC5A4 | -1.79448 | -0.93108 | 2.52E-30 | 3.18E-29 |
| CLEC12A | -1.8 | 2.723599 | 2.57E-30 | 3.24E-29 |
| ATAT1 | 1.308556 | 3.991469 | 2.61E-30 | 3.30E-29 |
| ABCB1 | -1.5896 | 2.404682 | 2.63E-30 | 3.31E-29 |
| FGD3 | -1.14749 | 4.256043 | 3.00E-30 | 3.78E-29 |
| COL3A1 | 2.549343 | 11.1513 | 3.09E-30 | 3.89E-29 |
| TWNK | 1.259821 | 3.966315 | 3.36E-30 | 4.23E-29 |
| FLRT3 | -1.76071 | 5.952312 | 3.48E-30 | 4.37E-29 |
| ITGA11 | 2.892739 | 5.566722 | 3.68E-30 | 4.62E-29 |
| FUT8 | 1.46302 | 6.092893 | 3.84E-30 | 4.81E-29 |
| FOXP3 | 1.881611 | 2.465515 | 4.00E-30 | 5.01E-29 |
| B4GALT3 | 1.021523 | 6.12335 | 4.35E-30 | 5.45E-29 |
| BAIAP2L2 | 3.705523 | 2.822676 | 4.38E-30 | 5.48E-29 |
| UQCC2 | 1.528113 | 5.482909 | 4.43E-30 | 5.54E-29 |
| FBXO41 | 1.734606 | 3.953657 | 4.50E-30 | 5.62E-29 |
| CST1 | 6.449885 | 4.465154 | 4.50E-30 | 5.62E-29 |
| CCNE2 | 1.963702 | 2.114145 | 4.60E-30 | 5.74E-29 |
| SRD5A1 | 1.591389 | 4.969922 | 4.69E-30 | 5.85E-29 |
| LIPA | -1.23354 | 7.611715 | 4.77E-30 | 5.94E-29 |
| H2BC6 | 3.465271 | 0.641853 | 5.08E-30 | 6.32E-29 |
| ZBTB16 | -2.33969 | 5.205607 | 5.50E-30 | 6.85E-29 |
| ECRG4 | -2.51236 | 1.905532 | 5.54E-30 | 6.89E-29 |
| F11 | -2.81346 | 1.253944 | 6.10E-30 | 7.58E-29 |
| P4HB | 1.096562 | 9.882762 | 6.14E-30 | 7.62E-29 |
| FAP | 2.294297 | 4.390681 | 6.26E-30 | 7.77E-29 |
| BHLHA15 | 2.993255 | 3.89503 | 6.45E-30 | 8.00E-29 |
| C1QB | -1.56795 | 8.316018 | 6.46E-30 | 8.01E-29 |
| ADAM28 | 2.317706 | 5.296074 | 6.49E-30 | 8.03E-29 |
| RADX | -1.6657 | 1.728074 | 6.91E-30 | 8.54E-29 |
| SULF1 | 2.574849 | 7.533398 | 6.92E-30 | 8.54E-29 |
| ESRP1 | 1.153462 | 6.988316 | 6.97E-30 | 8.60E-29 |
| CIP2A | 1.998711 | 3.351634 | 7.51E-30 | 9.25E-29 |
| PIK3R1 | -1.00774 | 5.939097 | 7.53E-30 | 9.28E-29 |
| BRI3BP | 1.233481 | 5.027157 | 7.66E-30 | 9.43E-29 |
| PPP1R17 | -2.78097 | -2.85942 | 8.18E-30 | 1.01E-28 |
| SLCO2B1 | -1.42069 | 6.811623 | 8.31E-30 | 1.02E-28 |
| PGR | -1.69415 | 1.929389 | 8.46E-30 | 1.04E-28 |
| RAC3 | 2.34401 | 3.935479 | 9.18E-30 | 1.13E-28 |
| CYP4B1 | -2.50041 | 7.382796 | 9.32E-30 | 1.14E-28 |
| PRKG1 | -1.37142 | 3.661266 | 9.69E-30 | 1.19E-28 |
| CLDN12 | 1.230527 | 6.267433 | 1.08E-29 | 1.32E-28 |
| HRCT1 | -1.71262 | 1.070387 | 1.10E-29 | 1.34E-28 |
| ZEB2 | -1.28645 | 5.945428 | 1.10E-29 | 1.35E-28 |
| GPR17 | -2.0151 | -0.14759 | 1.11E-29 | 1.36E-28 |
| SLC25A13 | 1.09492 | 5.311488 | 1.26E-29 | 1.54E-28 |
| FANCB | 1.840017 | 0.773939 | 1.31E-29 | 1.60E-28 |
| DECR2 | 1.405132 | 4.24286 | 1.32E-29 | 1.60E-28 |
| ONECUT2 | 4.941703 | 2.314107 | 1.45E-29 | 1.77E-28 |
| GPC2 | 3.425008 | 1.560983 | 1.48E-29 | 1.80E-28 |
| MNDA | -1.43493 | 4.598603 | 1.48E-29 | 1.80E-28 |
| SRPK3 | 3.18455 | 2.613375 | 1.58E-29 | 1.91E-28 |
| GOLGA7B | 2.746487 | 4.74092 | 1.80E-29 | 2.18E-28 |
| GAD1 | 3.783105 | 1.91698 | 1.86E-29 | 2.25E-28 |
| HASPIN | 1.957505 | 1.402938 | 2.11E-29 | 2.55E-28 |
| PABPC1L | 2.176327 | 5.203214 | 2.12E-29 | 2.56E-28 |
| TXNDC17 | 1.66763 | 6.344572 | 2.13E-29 | 2.57E-28 |
| HVCN1 | -1.07555 | 2.866436 | 2.17E-29 | 2.61E-28 |
| SLC15A2 | -1.57747 | 5.107258 | 2.19E-29 | 2.63E-28 |
| ITIH3 | -1.44743 | 1.039847 | 2.19E-29 | 2.63E-28 |
| FGF11 | 3.294275 | -1.34165 | 2.21E-29 | 2.65E-28 |
| TM6SF1 | -1.32245 | 1.584661 | 2.23E-29 | 2.68E-28 |
| AOC1 | 5.00002 | 5.435702 | 2.26E-29 | 2.72E-28 |
| SPINK1 | 6.669899 | 7.728757 | 2.30E-29 | 2.76E-28 |
| SPP2 | 7.410134 | 0.508164 | 2.33E-29 | 2.79E-28 |
| GNPNAT1 | 1.564782 | 4.631989 | 2.34E-29 | 2.80E-28 |
| LRP2BP | -1.58423 | 2.695384 | 2.37E-29 | 2.83E-28 |
| TNFRSF18 | 2.687129 | 3.117484 | 2.47E-29 | 2.95E-28 |
| ZMYND19 | 1.043342 | 4.338327 | 2.52E-29 | 3.01E-28 |
| B3GNT6 | 5.783482 | 4.274426 | 2.60E-29 | 3.10E-28 |
| AK4 | 2.623407 | 4.837962 | 2.63E-29 | 3.14E-28 |
| MS4A14 | -1.57173 | 1.677221 | 2.66E-29 | 3.17E-28 |
| SLITRK2 | -2.39259 | -0.51546 | 2.74E-29 | 3.26E-28 |
| RUNX2 | 1.668718 | 4.382746 | 2.82E-29 | 3.36E-28 |
| NETO1 | 4.75666 | 0.743088 | 3.26E-29 | 3.87E-28 |
| DOCK11 | -1.23561 | 5.026157 | 3.35E-29 | 3.97E-28 |
| SFTPA2 | -2.64349 | 12.49648 | 3.52E-29 | 4.17E-28 |
| FLVCR1 | 1.282816 | 4.717806 | 3.89E-29 | 4.61E-28 |
| ABHD11 | 1.456977 | 5.61841 | 3.94E-29 | 4.66E-28 |
| TNFSF11 | 4.085051 | 1.469426 | 4.00E-29 | 4.73E-28 |
| PIAS3 | 1.071585 | 5.821003 | 4.00E-29 | 4.73E-28 |
| LINC00634 | 3.75395 | -1.84084 | 4.03E-29 | 4.76E-28 |
| AKAP7 | -1.07219 | 2.739046 | 4.06E-29 | 4.79E-28 |
| SORD | 1.444733 | 4.522609 | 4.20E-29 | 4.96E-28 |
| COL24A1 | 1.984584 | 2.046172 | 4.32E-29 | 5.10E-28 |
| EHD2 | -1.25064 | 7.572987 | 4.35E-29 | 5.12E-28 |
| CNFN | 2.701617 | 1.425493 | 4.46E-29 | 5.25E-28 |
| TYROBP | -1.45992 | 6.666049 | 4.55E-29 | 5.35E-28 |
| NOSTRIN | -1.47144 | 4.135534 | 4.92E-29 | 5.79E-28 |
| ENO1 | 1.220694 | 10.95959 | 5.05E-29 | 5.92E-28 |
| NSUN2 | 1.058174 | 6.588983 | 5.18E-29 | 6.07E-28 |
| PTX3 | -2.02718 | 1.862349 | 5.18E-29 | 6.07E-28 |
| CENPH | 1.453983 | 3.19008 | 5.28E-29 | 6.19E-28 |
| ATP1B2 | -1.54085 | 1.559576 | 5.55E-29 | 6.49E-28 |
| RPS10 | 1.815523 | 0.828302 | 5.65E-29 | 6.60E-28 |
| THEMIS2 | -1.0702 | 5.871395 | 5.74E-29 | 6.71E-28 |
| CKS1B | 1.758485 | 4.972743 | 6.02E-29 | 7.02E-28 |
| TAF1D | 1.01742 | 5.830176 | 6.20E-29 | 7.21E-28 |
| VIL1 | 6.997167 | 4.740272 | 6.82E-29 | 7.93E-28 |
| CEP85 | 1.084385 | 4.575229 | 6.91E-29 | 8.03E-28 |
| ARHGAP30 | -1.12349 | 5.600376 | 6.92E-29 | 8.04E-28 |
| ZNF331 | -1.16752 | 4.980907 | 7.01E-29 | 8.14E-28 |
| TLL1 | -1.5497 | 1.957 | 7.10E-29 | 8.23E-28 |
| OIP5 | 2.097721 | -0.10283 | 7.24E-29 | 8.40E-28 |
| SLFN13 | 1.628287 | 5.620455 | 7.28E-29 | 8.43E-28 |
| LGSN | 4.596269 | 4.502121 | 7.29E-29 | 8.44E-28 |
| TMEM62 | 1.0954 | 5.195892 | 7.58E-29 | 8.77E-28 |
| IL18R1 | -1.45 | 2.817408 | 8.11E-29 | 9.37E-28 |
| CETP | -1.14644 | 1.230384 | 8.12E-29 | 9.38E-28 |
| PUS1 | 1.213583 | 4.611908 | 8.12E-29 | 9.38E-28 |
| FAM167A | -1.88369 | 4.210411 | 8.70E-29 | 1.00E-27 |
| HPCA | 2.622574 | -0.84303 | 8.71E-29 | 1.00E-27 |
| KCTD13 | 1.020402 | 4.49707 | 1.04E-28 | 1.20E-27 |
| TUBB6 | -1.28463 | 5.929085 | 1.04E-28 | 1.20E-27 |
| CABLES2 | 1.313234 | 4.161246 | 1.12E-28 | 1.29E-27 |
| NFIX | -1.41656 | 6.666839 | 1.18E-28 | 1.36E-27 |
| BMPER | -2.1779 | 2.101609 | 1.18E-28 | 1.36E-27 |
| FAM72B | 2.409342 | 0.236405 | 1.24E-28 | 1.42E-27 |
| PYCR3 | 1.423624 | 4.668802 | 1.28E-28 | 1.47E-27 |
| VIM | -1.1261 | 8.972074 | 1.39E-28 | 1.59E-27 |
| GMNN | 1.385613 | 4.31801 | 1.48E-28 | 1.69E-27 |
| DBF4B | 1.352549 | 3.332087 | 1.55E-28 | 1.77E-27 |
| BMP2 | -1.72252 | 5.127201 | 1.59E-28 | 1.82E-27 |
| COL22A1 | 3.600432 | 2.571408 | 1.61E-28 | 1.84E-27 |
| SLC29A4 | 3.145911 | 4.892595 | 1.63E-28 | 1.86E-27 |
| PROC | 4.042296 | 2.324051 | 1.78E-28 | 2.03E-27 |
| CCDC185 | 4.506937 | -1.13902 | 1.81E-28 | 2.06E-27 |
| H2AC13 | 4.950738 | 0.613496 | 1.92E-28 | 2.18E-27 |
| LPL | -2.05181 | 6.36011 | 1.92E-28 | 2.18E-27 |
| DUSP1 | -1.55098 | 8.721934 | 2.12E-28 | 2.40E-27 |
| CCHCR1 | 1.211635 | 4.990507 | 2.22E-28 | 2.52E-27 |
| DNAAF5 | 1.01326 | 5.647484 | 2.24E-28 | 2.54E-27 |
| HECW2 | -1.244 | 4.908904 | 2.32E-28 | 2.63E-27 |
| TRHDE | -2.62265 | 1.255512 | 2.32E-28 | 2.63E-27 |
| SGO2 | 1.610493 | 3.481539 | 2.38E-28 | 2.69E-27 |
| MICALL2 | 1.638084 | 5.804409 | 2.42E-28 | 2.74E-27 |
| EGLN3 | 3.079208 | 6.148396 | 2.43E-28 | 2.74E-27 |
| GRIN1 | 3.189623 | 1.549959 | 2.46E-28 | 2.78E-27 |
| MITF | -1.14267 | 4.215298 | 2.50E-28 | 2.81E-27 |
| SH2D1B | -1.76526 | 0.143271 | 2.53E-28 | 2.85E-27 |
| HMGCLL1 | -1.77002 | 0.676686 | 2.67E-28 | 3.01E-27 |
| CLPSL2 | 5.341205 | -0.65407 | 2.81E-28 | 3.16E-27 |
| COCH | 3.764206 | 2.267468 | 2.95E-28 | 3.32E-27 |
| GNGT1 | 6.193201 | -0.14084 | 3.09E-28 | 3.47E-27 |
| MFSD2A | -1.57197 | 5.933323 | 3.17E-28 | 3.57E-27 |
| SOX5 | -1.58847 | 1.8383 | 3.22E-28 | 3.62E-27 |
| PRELP | -1.53924 | 6.703806 | 3.38E-28 | 3.79E-27 |
| DLL3 | 6.866273 | 2.140092 | 3.45E-28 | 3.87E-27 |
| BAIAP2L1 | 1.269636 | 6.252929 | 3.51E-28 | 3.94E-27 |
| LDB3 | -1.55799 | 1.02897 | 3.56E-28 | 3.99E-27 |
| MS4A2 | -1.86249 | 2.739527 | 3.58E-28 | 4.01E-27 |
| MSMO1 | -1.05937 | 6.626187 | 3.68E-28 | 4.12E-27 |
| CHRNB4 | 3.325968 | -0.47894 | 3.79E-28 | 4.24E-27 |
| FAM189A1 | -2.11012 | 0.623793 | 3.81E-28 | 4.26E-27 |
| DCST2 | 2.387128 | 1.347474 | 3.84E-28 | 4.28E-27 |
| ZSCAN2 | 1.024553 | 2.519967 | 3.93E-28 | 4.39E-27 |
| HDGF | 1.052295 | 8.736845 | 4.33E-28 | 4.82E-27 |
| BNIP5 | 5.443325 | 1.180258 | 4.34E-28 | 4.83E-27 |
| SCN2B | -1.86939 | 0.933098 | 4.45E-28 | 4.95E-27 |
| ANKRD33B | -1.6713 | 2.486718 | 4.56E-28 | 5.07E-27 |
| NQO1 | 3.072825 | 8.145133 | 4.76E-28 | 5.28E-27 |
| ICA1 | 1.194728 | 5.577081 | 4.76E-28 | 5.29E-27 |
| FBXL19 | 1.19753 | 4.656073 | 4.83E-28 | 5.35E-27 |
| COL5A2 | 2.207511 | 7.793144 | 4.84E-28 | 5.37E-27 |
| ZNF107 | 1.33413 | 4.084821 | 4.92E-28 | 5.46E-27 |
| NKX1-2 | 7.570016 | 1.074855 | 5.20E-28 | 5.76E-27 |
| LHX6 | -1.40114 | 2.029495 | 5.69E-28 | 6.30E-27 |
| ATAD3B | 1.510714 | 4.887277 | 5.93E-28 | 6.55E-27 |
| SRRM3 | 2.330525 | 2.216087 | 6.75E-28 | 7.46E-27 |
| ACY3 | 2.919928 | 2.074438 | 7.50E-28 | 8.27E-27 |
| SCD5 | -1.5592 | 4.543814 | 7.85E-28 | 8.64E-27 |
| LPGAT1 | 1.131892 | 6.86991 | 8.02E-28 | 8.82E-27 |
| APLNR | -1.44964 | 4.130997 | 8.65E-28 | 9.51E-27 |
| B3GNT4 | 2.836484 | 1.242039 | 8.74E-28 | 9.60E-27 |
| ASAH2B | 1.084445 | 2.415261 | 8.80E-28 | 9.66E-27 |
| PRDM12 | 3.048089 | -2.39391 | 8.89E-28 | 9.75E-27 |
| NET1 | 1.391216 | 7.520121 | 9.02E-28 | 9.89E-27 |
| SMUG1 | 1.048971 | 5.170201 | 9.03E-28 | 9.89E-27 |
| FCN1 | -1.71051 | 4.206103 | 9.13E-28 | 9.99E-27 |
| GRTP1 | 1.550212 | 3.65681 | 9.27E-28 | 1.01E-26 |
| DTYMK | 1.311718 | 5.092703 | 9.31E-28 | 1.02E-26 |
| MMP12 | 4.002704 | 5.223739 | 9.40E-28 | 1.03E-26 |
| BCL2L10 | 4.102597 | -0.25132 | 9.49E-28 | 1.04E-26 |
| ARAP2 | -1.13311 | 5.234647 | 9.49E-28 | 1.04E-26 |
| ENPP2 | -1.27535 | 6.18834 | 9.71E-28 | 1.06E-26 |
| PTPRO | -1.40814 | 3.237131 | 1.15E-27 | 1.25E-26 |
| HDHD3 | 1.222784 | 5.009573 | 1.22E-27 | 1.33E-26 |
| CCT5 | 1.277572 | 7.732398 | 1.24E-27 | 1.35E-26 |
| EPHB2 | 2.285477 | 5.359892 | 1.33E-27 | 1.44E-26 |
| BYSL | 1.262608 | 4.807617 | 1.38E-27 | 1.50E-26 |
| H1-0 | 1.200004 | 8.427097 | 1.39E-27 | 1.51E-26 |
| IL31RA | 4.073409 | 1.980987 | 1.40E-27 | 1.52E-26 |
| HAVCR1 | 5.232417 | 1.578627 | 1.49E-27 | 1.61E-26 |
| CXCL16 | -1.04791 | 7.375253 | 1.53E-27 | 1.65E-26 |
| EPHX4 | 2.651392 | 2.030254 | 1.60E-27 | 1.73E-26 |
| HYAL1 | -1.86291 | 4.71267 | 1.62E-27 | 1.75E-26 |
| ZWILCH | 1.113968 | 3.797317 | 1.69E-27 | 1.83E-26 |
| ETV5 | -1.14303 | 5.906696 | 1.73E-27 | 1.86E-26 |
| FGL1 | 7.269775 | 5.544078 | 1.73E-27 | 1.87E-26 |
| METTL1 | 1.401629 | 4.328532 | 1.82E-27 | 1.96E-26 |
| SEL1L2 | -2.41136 | -3.69924 | 1.84E-27 | 1.98E-26 |
| SLC2A5 | 2.437312 | 3.329614 | 1.86E-27 | 2.00E-26 |
| INSL3 | 2.08839 | -1.01681 | 1.97E-27 | 2.12E-26 |
| DUSP13 | 6.052905 | 1.417594 | 2.08E-27 | 2.24E-26 |
| SLC17A9 | 2.528497 | 4.856916 | 2.13E-27 | 2.28E-26 |
| ADCY8 | -3.32163 | -0.1685 | 2.16E-27 | 2.31E-26 |
| AGBL1 | -2.63992 | 0.010217 | 2.17E-27 | 2.33E-26 |
| TNFRSF25 | 1.972241 | 3.835888 | 2.24E-27 | 2.39E-26 |
| BARD1 | 1.186425 | 3.932123 | 2.34E-27 | 2.51E-26 |
| SSTR1 | -2.20656 | 2.717852 | 2.36E-27 | 2.52E-26 |
| NCKAP1L | -1.24601 | 5.946642 | 2.39E-27 | 2.55E-26 |
| FOS | -1.6526 | 8.757959 | 2.39E-27 | 2.56E-26 |
| SYNGR4 | 4.264706 | -0.87674 | 2.46E-27 | 2.62E-26 |
| NME4 | 1.433758 | 6.580744 | 2.61E-27 | 2.78E-26 |
| CREB3L4 | 1.44723 | 4.616309 | 2.63E-27 | 2.80E-26 |
| EVI2B | -1.20702 | 4.788351 | 2.70E-27 | 2.87E-26 |
| MB | 3.254808 | 3.357319 | 2.79E-27 | 2.97E-26 |
| PIK3R5 | -1.19956 | 4.211352 | 2.95E-27 | 3.14E-26 |
| TEX11 | 3.445085 | -1.3304 | 2.97E-27 | 3.16E-26 |
| NGEF | 3.010587 | 3.477103 | 2.99E-27 | 3.18E-26 |
| DSCC1 | 1.813293 | 3.022388 | 3.31E-27 | 3.52E-26 |
| PEBP4 | -2.54355 | 5.280349 | 3.32E-27 | 3.52E-26 |
| PARD3B | -1.10267 | 4.323494 | 3.37E-27 | 3.58E-26 |
| OR1L8 | -1.57417 | -2.39194 | 3.49E-27 | 3.70E-26 |
| SASS6 | 1.255252 | 2.832917 | 3.53E-27 | 3.73E-26 |
| GIPC3 | -1.18831 | 2.581342 | 3.66E-27 | 3.87E-26 |
| RHPN1 | 1.947197 | 5.282487 | 3.73E-27 | 3.94E-26 |
| RPL39L | 2.354566 | 4.031967 | 3.85E-27 | 4.06E-26 |
| ATAD3A | 1.229807 | 4.818685 | 3.94E-27 | 4.15E-26 |
| PPIF | 1.114438 | 6.053267 | 4.07E-27 | 4.28E-26 |
| GRID1 | -1.41049 | 0.956446 | 4.24E-27 | 4.46E-26 |
| PRDM5 | -1.14559 | 2.748736 | 4.53E-27 | 4.77E-26 |
| ALG3 | 1.126975 | 5.884393 | 4.90E-27 | 5.14E-26 |
| DHTKD1 | 1.067541 | 5.72973 | 5.19E-27 | 5.45E-26 |
| KRTAP4-1 | 7.136919 | 0.368199 | 5.20E-27 | 5.46E-26 |
| MTFR1 | 1.30032 | 5.372125 | 5.48E-27 | 5.74E-26 |
| KCNJ5 | -1.76796 | 3.485309 | 5.85E-27 | 6.11E-26 |
| NKPD1 | 2.56025 | -0.7406 | 6.27E-27 | 6.55E-26 |
| METTL11B | 5.107672 | -2.01759 | 6.30E-27 | 6.58E-26 |
| EMILIN2 | -1.11751 | 5.288536 | 6.49E-27 | 6.77E-26 |
| NKAPL | -1.68258 | -1.02588 | 6.51E-27 | 6.79E-26 |
| CCDC167 | 1.429273 | 4.144051 | 6.55E-27 | 6.82E-26 |
| ST6GALNAC2 | -1.62669 | 2.106767 | 6.66E-27 | 6.94E-26 |
| MUC3A | 4.758065 | 5.727391 | 6.72E-27 | 7.00E-26 |
| GSG1L | -2.36016 | -2.51095 | 7.05E-27 | 7.34E-26 |
| CDH3 | 2.814272 | 6.961523 | 7.30E-27 | 7.59E-26 |
| H2BC9 | 4.736168 | 1.116441 | 7.54E-27 | 7.83E-26 |
| TPSAB1 | -1.72373 | 4.314847 | 8.10E-27 | 8.41E-26 |
| HMBS | 1.204091 | 4.975697 | 8.98E-27 | 9.31E-26 |
| MYOM2 | -1.50281 | 1.176656 | 9.01E-27 | 9.33E-26 |
| RXRG | -2.32425 | 1.11126 | 9.26E-27 | 9.59E-26 |
| GMDS | 1.505531 | 5.081256 | 1.04E-26 | 1.08E-25 |
| SFRP5 | -2.60714 | 1.21807 | 1.05E-26 | 1.08E-25 |
| LY86 | -1.38056 | 3.654474 | 1.12E-26 | 1.15E-25 |
| CCL2 | -1.47903 | 5.872767 | 1.13E-26 | 1.17E-25 |
| CNTFR | -2.39422 | -0.15296 | 1.13E-26 | 1.17E-25 |
| MAP7D2 | 3.39601 | 3.445129 | 1.17E-26 | 1.20E-25 |
| TTYH3 | 1.389344 | 7.363147 | 1.27E-26 | 1.30E-25 |
| SEMA4B | 1.61935 | 7.753228 | 1.28E-26 | 1.31E-25 |
| STON1 | -1.15542 | 3.303703 | 1.30E-26 | 1.33E-25 |
| NHSL2 | -1.24984 | 3.654527 | 1.31E-26 | 1.34E-25 |
| FAM155B | 3.224942 | 1.770902 | 1.39E-26 | 1.43E-25 |
| IGF2BP3 | 4.047109 | 3.75118 | 1.40E-26 | 1.43E-25 |
| ITPKC | -1.14939 | 6.258715 | 1.40E-26 | 1.43E-25 |
| RTN4RL2 | 2.883855 | 3.492772 | 1.44E-26 | 1.47E-25 |
| BARX1 | 7.531497 | 4.045318 | 1.52E-26 | 1.55E-25 |
| IL22RA2 | 3.781018 | 0.755615 | 1.63E-26 | 1.66E-25 |
| IL5RA | -2.0705 | 1.646197 | 1.64E-26 | 1.68E-25 |
| TESMIN | 2.780032 | 2.491242 | 1.67E-26 | 1.70E-25 |
| C15orf48 | 3.045785 | 4.296199 | 1.71E-26 | 1.74E-25 |
| GREB1L | 3.329002 | 2.374655 | 1.78E-26 | 1.81E-25 |
| DDIT4L | 3.31665 | 3.649748 | 1.78E-26 | 1.81E-25 |
| SLC2A9 | -1.07789 | 2.459802 | 1.83E-26 | 1.87E-25 |
| TIMP1 | 1.553364 | 8.986858 | 1.85E-26 | 1.88E-25 |
| CCDC137 | 1.045799 | 5.078292 | 1.89E-26 | 1.92E-25 |
| GPI | 1.145802 | 8.31357 | 2.07E-26 | 2.10E-25 |
| SCGB1A1 | -3.20745 | 6.425514 | 2.08E-26 | 2.11E-25 |
| SYNGR3 | 2.846142 | 2.124066 | 2.10E-26 | 2.12E-25 |
| CNN1 | -1.47597 | 4.092094 | 2.15E-26 | 2.18E-25 |
| GAREM2 | 1.981946 | 3.227109 | 2.20E-26 | 2.23E-25 |
| GFUS | 1.412554 | 6.936807 | 2.21E-26 | 2.23E-25 |
| AWAT2 | -2.55961 | -1.59986 | 2.26E-26 | 2.28E-25 |
| PLLP | -1.48 | 5.348104 | 2.26E-26 | 2.28E-25 |
| MMP17 | 2.713049 | 3.12264 | 2.35E-26 | 2.37E-25 |
| ZPLD1 | 4.660536 | 0.025727 | 2.41E-26 | 2.43E-25 |
| DUS4L | 1.149277 | 2.406136 | 2.42E-26 | 2.44E-25 |
| MELTF | 2.817832 | 4.703446 | 2.43E-26 | 2.44E-25 |
| LGI2 | 2.784923 | 3.94582 | 2.45E-26 | 2.46E-25 |
| NRN1 | -1.64505 | 3.46396 | 2.55E-26 | 2.56E-25 |
| HELT | -3.0846 | -2.85871 | 2.64E-26 | 2.65E-25 |
| RHOV | 3.653624 | 5.03329 | 2.68E-26 | 2.69E-25 |
| PRDX4 | 1.423605 | 7.060771 | 2.75E-26 | 2.76E-25 |
| MESP1 | 2.422031 | 2.234452 | 2.82E-26 | 2.83E-25 |
| TRAF5 | 1.361256 | 4.886482 | 2.92E-26 | 2.93E-25 |
| DDX11 | 1.505333 | 4.787113 | 2.92E-26 | 2.93E-25 |
| GEN1 | 1.167795 | 3.960012 | 2.94E-26 | 2.94E-25 |
| MTHFD2 | 1.531819 | 6.113532 | 3.03E-26 | 3.03E-25 |
| S100P | 5.075507 | 7.968107 | 3.14E-26 | 3.14E-25 |
| BICDL1 | 1.991387 | 4.614912 | 3.20E-26 | 3.19E-25 |
| NPSR1 | 5.982095 | -0.9281 | 3.24E-26 | 3.23E-25 |
| PRR36 | 2.223128 | 4.329159 | 3.27E-26 | 3.25E-25 |
| P3H2 | -1.8907 | 5.490351 | 3.43E-26 | 3.41E-25 |
| ARHGAP29 | -1.15778 | 6.150833 | 3.46E-26 | 3.44E-25 |
| FHDC1 | -1.11892 | 4.922726 | 3.56E-26 | 3.54E-25 |
| DAB2 | -1.06215 | 6.33334 | 3.76E-26 | 3.73E-25 |
| SNX25 | -1.18004 | 5.471262 | 3.92E-26 | 3.89E-25 |
| PODNL1 | 2.856626 | 4.037623 | 4.05E-26 | 4.02E-25 |
| ZNF92 | 1.058087 | 3.789349 | 4.06E-26 | 4.02E-25 |
| TUBG1 | 1.199818 | 5.356589 | 4.16E-26 | 4.12E-25 |
| GAB2 | -1.00012 | 5.740829 | 4.49E-26 | 4.45E-25 |
| FANCG | 1.695528 | -0.52128 | 4.55E-26 | 4.50E-25 |
| IL36RN | 6.260802 | 1.731153 | 4.73E-26 | 4.67E-25 |
| ATP6V1C2 | 3.269818 | 2.999081 | 4.95E-26 | 4.88E-25 |
| H2AX | 1.338255 | 5.540202 | 5.22E-26 | 5.15E-25 |
| CDCA4 | 1.452868 | 4.057358 | 5.53E-26 | 5.45E-25 |
| ACSS3 | -1.58529 | 3.957419 | 5.54E-26 | 5.46E-25 |
| ADCY9 | -1.11985 | 5.775114 | 5.65E-26 | 5.57E-25 |
| DNMT3B | 2.077315 | 2.904601 | 5.92E-26 | 5.82E-25 |
| GGTLC3 | -2.26487 | -2.96016 | 6.44E-26 | 6.33E-25 |
| OVOL1 | 2.321196 | 2.019723 | 6.97E-26 | 6.84E-25 |
| HECW1 | 2.395708 | 0.973046 | 7.03E-26 | 6.89E-25 |
| CAD | 1.145515 | 6.211165 | 7.21E-26 | 7.06E-25 |
| TMEM45B | 1.832105 | 5.949787 | 8.01E-26 | 7.84E-25 |
| CEACAM5 | 4.78186 | 9.711242 | 8.37E-26 | 8.19E-25 |
| TNFSF13 | -1.06152 | 3.960342 | 8.45E-26 | 8.25E-25 |
| TPPP | -1.65639 | 4.63235 | 8.69E-26 | 8.48E-25 |
| CAMK2N2 | 3.220105 | 0.669913 | 8.71E-26 | 8.50E-25 |
| PAQR4 | 1.494466 | 3.183924 | 8.86E-26 | 8.64E-25 |
| MCIDAS | 2.948815 | 1.38802 | 9.29E-26 | 9.05E-25 |
| PRIM2 | 1.007874 | 3.858367 | 9.68E-26 | 9.42E-25 |
| HSPB7 | -1.46701 | 2.589988 | 1.00E-25 | 9.75E-25 |
| MAGI1 | -1.03366 | 5.099545 | 1.04E-25 | 1.01E-24 |
| FAM178B | 2.960727 | 1.89345 | 1.06E-25 | 1.03E-24 |
| C11orf91 | -1.99785 | -2.41975 | 1.06E-25 | 1.03E-24 |
| LILRA6 | -1.41254 | 2.675832 | 1.07E-25 | 1.04E-24 |
| ARRDC4 | -1.12292 | 4.859474 | 1.11E-25 | 1.07E-24 |
| SLC26A6 | 1.405637 | 4.453639 | 1.16E-25 | 1.13E-24 |
| PNMA8C | -2.07414 | -1.82931 | 1.18E-25 | 1.14E-24 |
| PGLYRP4 | 4.283924 | 1.257693 | 1.23E-25 | 1.19E-24 |
| MCM8 | 1.224515 | 2.895126 | 1.25E-25 | 1.21E-24 |
| NFAM1 | -1.28466 | 4.376176 | 1.28E-25 | 1.23E-24 |
| NEGR1 | -1.63847 | 2.814692 | 1.33E-25 | 1.28E-24 |
| KLHL17 | 1.467639 | 3.361057 | 1.37E-25 | 1.32E-24 |
| RACGAP1 | 1.521969 | 5.251623 | 1.42E-25 | 1.36E-24 |
| COL5A1 | 2.036951 | 8.406964 | 1.43E-25 | 1.38E-24 |
| CCBE1 | -2.06929 | 3.530281 | 1.47E-25 | 1.42E-24 |
| SFTPD | -2.20128 | 8.091011 | 1.49E-25 | 1.43E-24 |
| RNF182 | -2.01378 | 1.065216 | 1.66E-25 | 1.59E-24 |
| ARHGEF19 | 1.570447 | 5.104454 | 1.72E-25 | 1.65E-24 |
| MID1IP1 | -1.02585 | 6.474401 | 1.74E-25 | 1.66E-24 |
| PLAU | 2.62406 | 7.18576 | 1.75E-25 | 1.67E-24 |
| CELF2 | -1.16311 | 6.565359 | 1.79E-25 | 1.71E-24 |
| IGFL2 | 3.786139 | 1.495627 | 1.81E-25 | 1.73E-24 |
| XKRX | 2.86471 | 4.049835 | 1.82E-25 | 1.74E-24 |
| PAEP | 7.674295 | 6.441336 | 1.84E-25 | 1.75E-24 |
| CD302 | -1.36272 | 3.308087 | 1.85E-25 | 1.76E-24 |
| PTGFRN | 1.188498 | 6.628868 | 1.90E-25 | 1.80E-24 |
| CEP72 | 1.317881 | 3.163677 | 1.90E-25 | 1.80E-24 |
| NDNF | -1.76836 | 6.617527 | 1.91E-25 | 1.82E-24 |
| CBX2 | 2.522662 | 4.277083 | 1.93E-25 | 1.84E-24 |
| ZMYND15 | -1.15697 | 2.970693 | 1.97E-25 | 1.87E-24 |
| KCNAB2 | -1.0364 | 5.486305 | 2.00E-25 | 1.90E-24 |
| METTL7B | 2.619715 | 4.134002 | 2.00E-25 | 1.90E-24 |
| TRIM31 | 4.021303 | 3.329671 | 2.06E-25 | 1.96E-24 |
| JUNB | -1.12335 | 7.52311 | 2.11E-25 | 2.00E-24 |
| EPHX3 | 2.254643 | 4.267762 | 2.16E-25 | 2.05E-24 |
| CENPM | 1.761661 | 3.15103 | 2.19E-25 | 2.08E-24 |
| GPX2 | 5.977116 | 6.829092 | 2.31E-25 | 2.19E-24 |
| C11orf24 | 1.027699 | 5.780395 | 2.33E-25 | 2.20E-24 |
| MAOB | -1.49804 | 4.660619 | 2.53E-25 | 2.39E-24 |
| LYPD3 | 3.470391 | 4.305081 | 2.54E-25 | 2.40E-24 |
| NXPH4 | 4.223183 | 2.543892 | 2.56E-25 | 2.42E-24 |
| POLR1G | 1.203005 | 2.160268 | 2.59E-25 | 2.44E-24 |
| P3H1 | 1.001096 | 5.496762 | 2.67E-25 | 2.52E-24 |
| MYLK | -1.19527 | 6.805814 | 2.68E-25 | 2.52E-24 |
| DRP2 | 3.086618 | 0.392113 | 2.90E-25 | 2.73E-24 |
| HLX | -1.16591 | 2.169277 | 3.03E-25 | 2.85E-24 |
| H3C12 | 5.837651 | -1.04185 | 3.11E-25 | 2.92E-24 |
| JSRP1 | 3.262825 | 2.544449 | 3.20E-25 | 3.00E-24 |
| PCYT1B | -1.94987 | 0.652028 | 3.24E-25 | 3.04E-24 |
| CDKL5 | -1.02736 | 4.680169 | 3.33E-25 | 3.12E-24 |
| PANX2 | 2.482337 | 4.108064 | 3.45E-25 | 3.23E-24 |
| PPARG | -1.55403 | 4.568779 | 3.58E-25 | 3.36E-24 |
| FBLN1 | -1.33321 | 7.679714 | 3.59E-25 | 3.36E-24 |
| AIMP2 | 1.077233 | 3.997785 | 3.63E-25 | 3.39E-24 |
| DSN1 | 1.063062 | 4.646468 | 3.67E-25 | 3.43E-24 |
| INCENP | 1.264888 | 4.686724 | 3.75E-25 | 3.50E-24 |
| ECEL1 | 5.050871 | 2.478915 | 3.79E-25 | 3.54E-24 |
| URB1 | 1.155923 | 5.845335 | 3.80E-25 | 3.54E-24 |
| NKAIN1 | 4.721739 | 0.255211 | 3.97E-25 | 3.70E-24 |
| RNFT2 | 2.247149 | 2.850683 | 3.99E-25 | 3.72E-24 |
| BIK | 2.02996 | 3.01175 | 4.25E-25 | 3.96E-24 |
| IL20RA | -1.69434 | 3.609811 | 4.26E-25 | 3.97E-24 |
| SMTNL2 | -1.69513 | 0.786451 | 4.43E-25 | 4.12E-24 |
| RCOR2 | 2.819162 | 2.449396 | 4.56E-25 | 4.23E-24 |
| CDKN2A | 3.60101 | 4.399071 | 4.97E-25 | 4.61E-24 |
| HGH1 | 1.176558 | 5.241171 | 5.07E-25 | 4.70E-24 |
| CKAP4 | 1.102101 | 7.345288 | 5.09E-25 | 4.71E-24 |
| GPR89B | 1.023933 | 1.904208 | 5.23E-25 | 4.84E-24 |
| PLA2G5 | -1.23267 | 1.404966 | 5.23E-25 | 4.84E-24 |
| COL7A1 | 3.17584 | 4.852713 | 5.48E-25 | 5.07E-24 |
| NSUN5 | 1.000466 | 5.033188 | 5.69E-25 | 5.26E-24 |
| ARMCX1 | -1.02656 | 3.87297 | 5.75E-25 | 5.31E-24 |
| HYOU1 | 1.146818 | 7.8643 | 5.75E-25 | 5.31E-24 |
| PXDC1 | -1.03093 | 5.359188 | 5.92E-25 | 5.46E-24 |
| MXD3 | 1.531488 | 2.957602 | 6.22E-25 | 5.73E-24 |
| LRRK2 | -1.97745 | 7.267153 | 6.37E-25 | 5.87E-24 |
| ACRV1 | 2.630741 | -1.60322 | 6.54E-25 | 6.02E-24 |
| LRRC20 | 1.198554 | 5.030706 | 6.80E-25 | 6.26E-24 |
| SOX12 | 1.375199 | 5.192155 | 6.98E-25 | 6.41E-24 |
| JPH2 | -1.47839 | 2.115771 | 7.17E-25 | 6.57E-24 |
| GPRIN2 | -1.63061 | 3.576814 | 7.31E-25 | 6.70E-24 |
| E2F5 | 1.30245 | 3.687425 | 8.04E-25 | 7.34E-24 |
| KREMEN2 | 2.886235 | 0.386109 | 8.15E-25 | 7.44E-24 |
| KIF20B | 1.330799 | 3.996312 | 8.49E-25 | 7.75E-24 |
| DNAJB4 | -1.16029 | 4.514148 | 8.50E-25 | 7.75E-24 |
| MTURN | -1.22476 | 5.465789 | 8.56E-25 | 7.81E-24 |
| CLIC3 | -1.77171 | 4.702899 | 8.57E-25 | 7.81E-24 |
| MYOZ3 | -1.37267 | 0.132805 | 8.89E-25 | 8.10E-24 |
| FOXI3 | 6.766654 | 1.654324 | 9.16E-25 | 8.34E-24 |
| H3C10 | 2.684145 | 2.309794 | 9.27E-25 | 8.43E-24 |
| ARNTL2 | 2.510775 | 5.208451 | 9.37E-25 | 8.51E-24 |
| LSAMP | -1.39124 | 4.054717 | 9.65E-25 | 8.75E-24 |
| INHA | 6.42524 | 3.668454 | 9.65E-25 | 8.75E-24 |
| ERFE | 3.35333 | 2.583814 | 9.95E-25 | 9.01E-24 |
| GSDMB | 1.763299 | 4.881811 | 9.99E-25 | 9.05E-24 |
| DSP | 2.216784 | 8.631236 | 1.01E-24 | 9.13E-24 |
| APCDD1L | 4.11933 | 1.349471 | 1.01E-24 | 9.16E-24 |
| STAC3 | -1.02663 | 2.455773 | 1.01E-24 | 9.16E-24 |
| PROK2 | -2.02317 | -1.12297 | 1.09E-24 | 9.82E-24 |
| TEF | -1.13114 | 5.169459 | 1.13E-24 | 1.02E-23 |
| CYP3A7 | -2.09132 | -2.36229 | 1.15E-24 | 1.04E-23 |
| MESP2 | 3.142876 | 0.563855 | 1.18E-24 | 1.06E-23 |
| OGN | -2.13424 | 3.416757 | 1.29E-24 | 1.16E-23 |
| PUSL1 | 1.225678 | 3.456418 | 1.42E-24 | 1.28E-23 |
| NIPSNAP1 | 1.094159 | 6.053054 | 1.46E-24 | 1.31E-23 |
| TMED3 | 1.226597 | 7.275287 | 1.51E-24 | 1.35E-23 |
| AQP10 | -2.15838 | -2.35863 | 1.51E-24 | 1.35E-23 |
| NPW | 5.10698 | 1.997736 | 1.59E-24 | 1.43E-23 |
| TPSB2 | -1.82434 | 4.631089 | 1.60E-24 | 1.43E-23 |
| PHLDB2 | -1.37453 | 5.170164 | 1.62E-24 | 1.45E-23 |
| DLG5 | 1.207333 | 5.581294 | 1.89E-24 | 1.69E-23 |
| SMPDL3B | 1.85163 | 5.417966 | 1.92E-24 | 1.72E-23 |
| TPRG1 | -1.41394 | 2.529056 | 2.01E-24 | 1.80E-23 |
| CST4 | 6.938774 | 0.372223 | 2.03E-24 | 1.81E-23 |
| SERPINH1 | 1.120279 | 8.243524 | 2.08E-24 | 1.85E-23 |
| ALDH2 | -1.16645 | 7.908336 | 2.15E-24 | 1.92E-23 |
| IL23A | 2.164662 | 1.591074 | 2.16E-24 | 1.92E-23 |
| ARHGEF37 | -1.30265 | 3.442782 | 2.28E-24 | 2.03E-23 |
| NR4A1 | -1.73888 | 7.212806 | 2.50E-24 | 2.22E-23 |
| HCK | -1.30379 | 5.49758 | 2.52E-24 | 2.23E-23 |
| FA2H | 2.548784 | 4.847973 | 2.52E-24 | 2.24E-23 |
| AP1S1 | 1.153847 | 5.982065 | 2.61E-24 | 2.31E-23 |
| CNKSR2 | -1.71907 | 1.335349 | 2.69E-24 | 2.38E-23 |
| ABCB9 | 1.31808 | 3.335007 | 2.70E-24 | 2.38E-23 |
| BRCA1 | 1.507484 | 4.176512 | 2.86E-24 | 2.52E-23 |
| PEAK3 | -1.23401 | 0.017142 | 2.95E-24 | 2.60E-23 |
| SCARA5 | -2.30356 | 3.246467 | 2.99E-24 | 2.64E-23 |
| ANKRD34B | 5.133395 | 1.441623 | 3.02E-24 | 2.66E-23 |
| SLC25A48 | 4.210739 | -1.16011 | 3.05E-24 | 2.69E-23 |
| NDC1 | 1.048732 | 5.28203 | 3.06E-24 | 2.69E-23 |
| MANEAL | 1.79022 | 3.174648 | 3.12E-24 | 2.74E-23 |
| LSR | 1.406995 | 8.057274 | 3.18E-24 | 2.79E-23 |
| IL37 | 6.353295 | 3.366061 | 3.40E-24 | 2.98E-23 |
| VSTM4 | -1.21316 | 4.467799 | 3.42E-24 | 3.00E-23 |
| STRIP2 | 2.762477 | 3.72224 | 3.73E-24 | 3.27E-23 |
| CENPO | 1.135486 | 3.272266 | 4.27E-24 | 3.74E-23 |
| SIM2 | 5.287997 | 0.992753 | 4.38E-24 | 3.82E-23 |
| DUSP9 | 4.606161 | 1.508844 | 4.45E-24 | 3.89E-23 |
| HOOK1 | 1.120188 | 5.481204 | 4.47E-24 | 3.90E-23 |
| DNASE1 | 1.21605 | 4.262409 | 4.67E-24 | 4.07E-23 |
| SGK1 | -1.16882 | 7.099945 | 4.72E-24 | 4.10E-23 |
| MYOZ1 | -1.78374 | 1.434214 | 4.85E-24 | 4.22E-23 |
| APLN | -1.61346 | 4.113661 | 4.87E-24 | 4.24E-23 |
| PCP4 | 5.457783 | 4.106638 | 4.88E-24 | 4.24E-23 |
| ZDHHC19 | -1.81474 | -1.38834 | 5.05E-24 | 4.39E-23 |
| PPP2R2C | 5.015227 | 3.61658 | 5.39E-24 | 4.67E-23 |
| SRD5A3 | 1.617646 | 6.041508 | 5.55E-24 | 4.81E-23 |
| FAM24B | 1.589482 | 0.910182 | 5.61E-24 | 4.86E-23 |
| FUT9 | 6.595847 | 1.484544 | 5.80E-24 | 5.01E-23 |
| PPFIA4 | 2.444951 | 2.548221 | 6.05E-24 | 5.23E-23 |
| RAB3B | 4.25908 | 3.203037 | 6.09E-24 | 5.26E-23 |
| KPNA7 | 2.270073 | 2.055413 | 6.26E-24 | 5.40E-23 |
| TLL2 | 2.980173 | 0.53973 | 6.36E-24 | 5.48E-23 |
| HES6 | 2.888411 | 4.65831 | 6.91E-24 | 5.96E-23 |
| TSPAN6 | 1.14152 | 6.183576 | 6.92E-24 | 5.96E-23 |
| ADRA1D | -1.87523 | -0.36028 | 7.19E-24 | 6.19E-23 |
| ARHGAP23 | -1.07444 | 5.606508 | 7.26E-24 | 6.24E-23 |
| H2BC8 | 3.833919 | 2.314794 | 7.43E-24 | 6.39E-23 |
| GJC2 | -1.38716 | 1.204829 | 7.72E-24 | 6.64E-23 |
| EPYC | 5.273488 | 0.491466 | 7.79E-24 | 6.69E-23 |
| H2BC7 | 4.834237 | 0.078477 | 7.84E-24 | 6.73E-23 |
| PLA2G2F | 5.528709 | -1.08474 | 7.94E-24 | 6.82E-23 |
| PRC1 | 1.816746 | -1.75809 | 8.24E-24 | 7.06E-23 |
| KAZN | -1.25296 | 3.604504 | 8.44E-24 | 7.23E-23 |
| DERL3 | 2.205648 | 3.303168 | 8.58E-24 | 7.34E-23 |
| SLC31A2 | -1.29082 | -0.85014 | 8.61E-24 | 7.37E-23 |
| AJM1 | 1.547953 | 2.390153 | 8.78E-24 | 7.51E-23 |
| C12orf42 | 2.977151 | -0.5715 | 8.82E-24 | 7.54E-23 |
| FAM72D | 2.321893 | -0.42779 | 8.90E-24 | 7.61E-23 |
| PPIL1 | 1.058453 | 5.302207 | 8.92E-24 | 7.61E-23 |
| FCER1G | -1.21187 | 6.066905 | 8.92E-24 | 7.62E-23 |
| PLPPR5 | -2.39963 | -2.65521 | 8.98E-24 | 7.66E-23 |
| ZDHHC9 | 1.281616 | 7.742278 | 9.19E-24 | 7.83E-23 |
| ASPHD1 | 2.796712 | 3.539399 | 9.36E-24 | 7.97E-23 |
| RGS9BP | -1.65825 | -0.94737 | 9.45E-24 | 8.04E-23 |
| ECM2 | -1.21544 | 3.87718 | 9.54E-24 | 8.12E-23 |
| TYMS | 1.395308 | 2.488956 | 9.57E-24 | 8.14E-23 |
| TFF1 | 9.292629 | 5.956744 | 1.01E-23 | 8.62E-23 |
| PADI1 | 6.4221 | 2.496734 | 1.02E-23 | 8.65E-23 |
| TPI1 | 1.139412 | 9.205265 | 1.04E-23 | 8.81E-23 |
| TSLP | -1.72795 | -0.12413 | 1.07E-23 | 9.06E-23 |
| TRIM45 | 1.340311 | 2.72523 | 1.08E-23 | 9.18E-23 |
| DTX2 | 1.313578 | 5.434318 | 1.09E-23 | 9.20E-23 |
| VGF | 6.081069 | 2.651242 | 1.09E-23 | 9.25E-23 |
| IGFBP3 | 2.201011 | 8.517057 | 1.10E-23 | 9.33E-23 |
| BTG2 | -1.27252 | 7.591762 | 1.13E-23 | 9.59E-23 |
| CPB2 | -2.68432 | 3.53481 | 1.17E-23 | 9.88E-23 |
| MZT2A | 1.202553 | 4.799935 | 1.19E-23 | 1.01E-22 |
| H2BC15 | 1.946899 | 1.596654 | 1.19E-23 | 1.01E-22 |
| CCDC58 | 1.043948 | 3.865373 | 1.20E-23 | 1.02E-22 |
| TMEM220 | -1.24605 | 2.457711 | 1.21E-23 | 1.02E-22 |
| TTYH1 | 2.470815 | 0.032837 | 1.25E-23 | 1.05E-22 |
| LAPTM5 | -1.17379 | 7.670674 | 1.29E-23 | 1.09E-22 |
| AKR1B15 | 5.823318 | 2.061158 | 1.31E-23 | 1.10E-22 |
| RXFP2 | -2.73404 | -2.13623 | 1.35E-23 | 1.14E-22 |
| SLC1A4 | 1.139501 | 5.653584 | 1.37E-23 | 1.15E-22 |
| NDUFA13 | 1.14205 | 0.338833 | 1.38E-23 | 1.16E-22 |
| CDH17 | 5.300966 | 3.799574 | 1.41E-23 | 1.18E-22 |
| SSR4 | 1.385389 | 8.410717 | 1.42E-23 | 1.19E-22 |
| GIPC2 | -1.71882 | 2.10305 | 1.42E-23 | 1.19E-22 |
| PABPC1 | 1.081445 | 10.67858 | 1.43E-23 | 1.20E-22 |
| DHRS13 | 1.188196 | 1.894428 | 1.45E-23 | 1.22E-22 |
| SLC7A11 | 3.101717 | 5.489307 | 1.51E-23 | 1.27E-22 |
| TMEM156 | 2.501486 | 2.887152 | 1.53E-23 | 1.28E-22 |
| TTC39C | 1.532116 | 5.035008 | 1.54E-23 | 1.29E-22 |
| FAM72A | 1.978104 | 0.1721 | 1.57E-23 | 1.31E-22 |
| CCDC34 | 1.473798 | 3.766436 | 1.58E-23 | 1.32E-22 |
| UBE2S | 1.747998 | 4.372783 | 1.58E-23 | 1.32E-22 |
| CFAP161 | -2.04446 | -0.02605 | 1.67E-23 | 1.39E-22 |
| PFDN6 | 1.079026 | 5.318452 | 1.73E-23 | 1.45E-22 |
| WDR88 | 1.445857 | 0.223025 | 1.76E-23 | 1.46E-22 |
| BDH1 | 1.354614 | 4.645654 | 1.77E-23 | 1.48E-22 |
| ABLIM3 | -1.39127 | 4.491862 | 1.81E-23 | 1.51E-22 |
| CXCL3 | -1.70188 | 3.177791 | 1.85E-23 | 1.54E-22 |
| THEM5 | 1.919142 | 2.841596 | 1.86E-23 | 1.54E-22 |
| BCAN | 3.062882 | 1.123526 | 2.07E-23 | 1.72E-22 |
| FAM72C | 2.741796 | -1.00366 | 2.09E-23 | 1.74E-22 |
| RNF183 | 4.151192 | 1.895671 | 2.36E-23 | 1.96E-22 |
| C9orf24 | -2.37945 | 2.66325 | 2.50E-23 | 2.07E-22 |
| CERCAM | 1.48413 | 5.943837 | 2.53E-23 | 2.10E-22 |
| TRIM15 | 6.230288 | 0.860375 | 2.68E-23 | 2.22E-22 |
| MIOX | 4.167356 | 0.863623 | 2.91E-23 | 2.41E-22 |
| SP8 | 6.784997 | 1.270164 | 2.91E-23 | 2.41E-22 |
| FBXO16 | 1.375091 | 1.668444 | 2.94E-23 | 2.43E-22 |
| THNSL1 | 1.032355 | 3.477922 | 2.97E-23 | 2.45E-22 |
| RASGRF1 | -2.01621 | 4.507277 | 3.01E-23 | 2.49E-22 |
| YDJC | 1.280366 | 4.589354 | 3.02E-23 | 2.49E-22 |
| CCL14 | -1.99884 | -1.15731 | 3.16E-23 | 2.61E-22 |
| GJB6 | 5.107602 | 2.203971 | 3.22E-23 | 2.65E-22 |
| DUSP8 | -1.10861 | 4.184413 | 3.37E-23 | 2.78E-22 |
| NSMF | 1.303512 | 5.90275 | 3.39E-23 | 2.79E-22 |
| TMEM139 | -1.87412 | 1.337338 | 3.42E-23 | 2.82E-22 |
| DHRS11 | 1.100373 | 3.656388 | 3.52E-23 | 2.90E-22 |
| LHX2 | 4.694322 | -0.64731 | 3.62E-23 | 2.97E-22 |
| TOX3 | 2.847486 | 4.918827 | 3.67E-23 | 3.01E-22 |
| LTC4S | -1.19209 | 1.387284 | 3.79E-23 | 3.11E-22 |
| TCN1 | 6.472421 | 4.848334 | 3.97E-23 | 3.26E-22 |
| PGLYRP3 | 5.669691 | -0.2908 | 4.20E-23 | 3.44E-22 |
| MX2 | 1.497545 | 6.034116 | 4.20E-23 | 3.44E-22 |
| CD244 | -1.31926 | 1.414709 | 4.21E-23 | 3.45E-22 |
| HOATZ | -2.40696 | 1.317576 | 4.40E-23 | 3.61E-22 |
| SLC12A8 | 1.330305 | 4.722763 | 4.53E-23 | 3.71E-22 |
| GLB1L3 | 5.237811 | 4.565013 | 4.71E-23 | 3.86E-22 |
| IL20RB | 3.842517 | 3.24097 | 4.81E-23 | 3.94E-22 |
| LYSMD1 | 1.045151 | 3.719016 | 4.82E-23 | 3.94E-22 |
| CELF5 | 3.303363 | 0.445749 | 4.90E-23 | 4.01E-22 |
| POMK | 1.257604 | 5.655323 | 5.00E-23 | 4.09E-22 |
| COLEC10 | -2.14778 | 0.43382 | 5.04E-23 | 4.12E-22 |
| MUC13 | 5.951676 | 6.058048 | 5.07E-23 | 4.14E-22 |
| PKIG | -1.11781 | 5.54622 | 5.14E-23 | 4.19E-22 |
| SCG5 | 2.859587 | 3.664754 | 5.47E-23 | 4.45E-22 |
| SIRPB2 | -1.20626 | 2.945623 | 5.51E-23 | 4.49E-22 |
| CAMK2A | -1.49331 | -0.28893 | 5.56E-23 | 4.52E-22 |
| MCC | -1.17356 | 4.095133 | 5.66E-23 | 4.61E-22 |
| CRELD2 | 1.103221 | 5.909217 | 5.69E-23 | 4.62E-22 |
| CPNE4 | 2.770631 | 2.073132 | 5.72E-23 | 4.64E-22 |
| RNF186 | 5.004242 | -0.60231 | 5.87E-23 | 4.76E-22 |
| FUT6 | 3.941972 | 2.98836 | 6.04E-23 | 4.89E-22 |
| COL17A1 | 4.198776 | 6.115215 | 6.12E-23 | 4.96E-22 |
| DAP | 1.004048 | 8.096694 | 6.31E-23 | 5.10E-22 |
| FAM180B | -2.04058 | -3.03596 | 6.35E-23 | 5.14E-22 |
| OSBPL6 | -1.49868 | 3.210157 | 6.55E-23 | 5.30E-22 |
| CRYGN | 3.285207 | 0.309161 | 6.86E-23 | 5.54E-22 |
| HMGA2 | 5.785383 | 4.240666 | 6.87E-23 | 5.55E-22 |
| LAPTM4B | 1.470812 | 8.505299 | 6.89E-23 | 5.55E-22 |
| MTG1 | 1.2219 | 1.801906 | 7.09E-23 | 5.71E-22 |
| RTBDN | 4.991787 | -0.75394 | 7.16E-23 | 5.77E-22 |
| SULT1A1 | -1.23172 | 4.556558 | 7.26E-23 | 5.85E-22 |
| ENDOU | -1.5587 | -1.76515 | 7.60E-23 | 6.11E-22 |
| CCND2 | -1.22797 | 5.6161 | 8.59E-23 | 6.89E-22 |
| PACSIN1 | 2.493792 | 1.487384 | 8.65E-23 | 6.94E-22 |
| SMIM22 | 1.975317 | 3.801021 | 8.83E-23 | 7.07E-22 |
| STK32A | 2.118339 | 4.63853 | 8.91E-23 | 7.14E-22 |
| SLC9A7 | 1.249419 | 5.069562 | 9.12E-23 | 7.30E-22 |
| CATSPERD | -2.53611 | -0.04091 | 9.18E-23 | 7.35E-22 |
| MYO1F | -1.02505 | 5.409343 | 9.32E-23 | 7.46E-22 |
| PDIA6 | 1.048545 | 7.96387 | 1.01E-22 | 8.05E-22 |
| ZIC2 | 5.225062 | 0.973691 | 1.01E-22 | 8.08E-22 |
| TENM4 | 1.819233 | 4.143919 | 1.02E-22 | 8.13E-22 |
| MCM7 | 1.307641 | 7.039112 | 1.03E-22 | 8.24E-22 |
| ARTN | 2.746425 | 1.474794 | 1.03E-22 | 8.24E-22 |
| JUN | -1.06385 | 8.027351 | 1.03E-22 | 8.25E-22 |
| PRKDC | 1.146096 | 7.942171 | 1.10E-22 | 8.73E-22 |
| LST1 | -1.32353 | 4.500292 | 1.11E-22 | 8.87E-22 |
| RNF207 | 1.60878 | 3.744583 | 1.12E-22 | 8.88E-22 |
| ENTPD7 | 1.007107 | 4.805621 | 1.12E-22 | 8.93E-22 |
| CLEC4E | -1.6078 | 2.44204 | 1.14E-22 | 9.05E-22 |
| AGPAT4 | -1.08625 | 3.577385 | 1.14E-22 | 9.09E-22 |
| PLPP5 | 1.168303 | 5.910858 | 1.16E-22 | 9.20E-22 |
| ZP3 | 1.896812 | 2.687044 | 1.16E-22 | 9.22E-22 |
| KIFC2 | 1.825164 | 4.209939 | 1.17E-22 | 9.31E-22 |
| TRIM46 | 1.814583 | 2.723342 | 1.18E-22 | 9.35E-22 |
| KMO | -1.25515 | 2.205811 | 1.19E-22 | 9.40E-22 |
| SGK2 | 2.658644 | 1.93508 | 1.19E-22 | 9.43E-22 |
| CYP27C1 | 3.036769 | 2.007829 | 1.19E-22 | 9.44E-22 |
| MYL3 | -1.0363 | 0.199932 | 1.23E-22 | 9.75E-22 |
| NRG1 | -1.71733 | 2.578617 | 1.25E-22 | 9.85E-22 |
| F10 | -1.50055 | 2.04062 | 1.25E-22 | 9.88E-22 |
| FBXL6 | 1.216651 | 4.159506 | 1.26E-22 | 9.93E-22 |
| B3GALNT1 | -1.2416 | 4.208205 | 1.32E-22 | 1.04E-21 |
| IL36G | 4.388933 | -0.4726 | 1.37E-22 | 1.08E-21 |
| TESC | 3.621403 | 6.42402 | 1.37E-22 | 1.08E-21 |
| CPA3 | -1.66852 | 5.099118 | 1.44E-22 | 1.14E-21 |
| C1orf56 | 1.249295 | 3.498405 | 1.46E-22 | 1.15E-21 |
| UMODL1 | 4.331911 | 2.908365 | 1.49E-22 | 1.17E-21 |
| MYO3B | 3.537125 | 1.723503 | 1.51E-22 | 1.18E-21 |
| FOXA3 | 3.301299 | 3.20228 | 1.56E-22 | 1.22E-21 |
| PGLYRP1 | -1.98541 | -2.53851 | 1.58E-22 | 1.24E-21 |
| AMIGO1 | -1.04131 | 3.74532 | 1.59E-22 | 1.25E-21 |
| AGR2 | 2.517834 | 9.330571 | 1.61E-22 | 1.26E-21 |
| KCTD16 | -1.59327 | 0.721014 | 1.62E-22 | 1.27E-21 |
| MAP6 | -1.40283 | 3.273978 | 1.64E-22 | 1.28E-21 |
| TEKT3 | -1.75788 | -0.27499 | 1.70E-22 | 1.33E-21 |
| SLC22A18 | 1.431772 | 5.113569 | 1.72E-22 | 1.34E-21 |
| C2orf15 | 1.206692 | 2.034731 | 1.74E-22 | 1.36E-21 |
| C8B | -2.619 | 2.152141 | 1.74E-22 | 1.36E-21 |
| CDK5RAP3 | 1.798137 | 3.138104 | 1.75E-22 | 1.36E-21 |
| MMP3 | 3.931118 | 1.277892 | 1.75E-22 | 1.37E-21 |
| SOBP | -1.38451 | 2.576404 | 1.77E-22 | 1.38E-21 |
| WNT9A | -1.23249 | 3.535811 | 1.78E-22 | 1.39E-21 |
| FKBP2 | 1.681521 | -1.72041 | 1.78E-22 | 1.39E-21 |
| PACRG | -2.03363 | 1.022856 | 1.79E-22 | 1.40E-21 |
| ITGAL | -1.17511 | 5.433835 | 1.82E-22 | 1.41E-21 |
| FCRL5 | 2.585922 | 3.98482 | 1.86E-22 | 1.45E-21 |
| H4C14 | 2.230611 | -0.87715 | 1.89E-22 | 1.47E-21 |
| CHAF1A | 1.049711 | 4.161509 | 1.92E-22 | 1.49E-21 |
| NRK | 3.772148 | 3.314892 | 1.99E-22 | 1.55E-21 |
| CARD11 | 1.871796 | 5.011528 | 2.02E-22 | 1.57E-21 |
| GSTA3 | -2.48958 | -0.89626 | 2.03E-22 | 1.58E-21 |
| PCDHGA12 | -1.28829 | 1.181424 | 2.06E-22 | 1.59E-21 |
| SAMD14 | -1.08469 | 1.746412 | 2.10E-22 | 1.63E-21 |
| SIGLEC5 | -1.55338 | -2.47605 | 2.13E-22 | 1.65E-21 |
| HOXC13 | 6.92551 | 1.025093 | 2.15E-22 | 1.67E-21 |
| PLOD2 | 2.083216 | 7.05209 | 2.23E-22 | 1.73E-21 |
| KCNA10 | -2.25515 | -3.33535 | 2.29E-22 | 1.77E-21 |
| PRB3 | 4.481716 | 0.559768 | 2.30E-22 | 1.78E-21 |
| PKHD1L1 | -1.94467 | 2.566657 | 2.36E-22 | 1.82E-21 |
| TNS4 | 3.946641 | 5.257544 | 2.43E-22 | 1.88E-21 |
| C2orf16 | 1.221646 | 2.091694 | 2.45E-22 | 1.89E-21 |
| H1-3 | 6.731361 | 1.427479 | 2.53E-22 | 1.95E-21 |
| SLC7A10 | 4.78925 | 1.683219 | 2.56E-22 | 1.97E-21 |
| ALDH3B2 | 2.853548 | 3.769847 | 2.63E-22 | 2.02E-21 |
| H1-4 | 5.785708 | 2.153471 | 2.79E-22 | 2.14E-21 |
| LIMK1 | 1.145745 | 6.679066 | 2.92E-22 | 2.24E-21 |
| PGAM5 | 1.021206 | 5.796913 | 2.95E-22 | 2.26E-21 |
| TNFAIP8L3 | -1.16632 | 2.456068 | 2.96E-22 | 2.27E-21 |
| VSX1 | 3.845837 | -1.02962 | 2.97E-22 | 2.28E-21 |
| ERVFRD-1 | -1.92974 | -0.87889 | 3.00E-22 | 2.30E-21 |
| TMEM74B | -1.41537 | -0.14349 | 3.09E-22 | 2.36E-21 |
| RAMP1 | 2.24014 | 5.215862 | 3.11E-22 | 2.38E-21 |
| SIX1 | 2.40195 | 4.887708 | 3.12E-22 | 2.39E-21 |
| SRSF12 | 2.143076 | 1.266897 | 3.14E-22 | 2.40E-21 |
| NHS | 1.884229 | 4.176004 | 3.15E-22 | 2.41E-21 |
| PCNA | 1.139001 | 6.566143 | 3.15E-22 | 2.41E-21 |
| TCF4 | -1.07626 | 6.165155 | 3.17E-22 | 2.42E-21 |
| TARS1 | 1.002342 | 6.814717 | 3.20E-22 | 2.44E-21 |
| LRRC18 | -2.16731 | -0.0897 | 3.26E-22 | 2.48E-21 |
| AKR1B10 | 7.419198 | 6.460179 | 3.32E-22 | 2.53E-21 |
| SEC61A2 | 1.061396 | 2.907185 | 3.34E-22 | 2.54E-21 |
| HBD | -2.11712 | -2.47308 | 3.34E-22 | 2.55E-21 |
| HOXB9 | 7.165557 | 3.710248 | 3.41E-22 | 2.59E-21 |
| GREB1 | 2.722103 | 3.514517 | 3.52E-22 | 2.67E-21 |
| JAM3 | -1.24069 | 3.516459 | 3.53E-22 | 2.68E-21 |
| CCT6A | 1.1317 | 7.94046 | 3.59E-22 | 2.73E-21 |
| SRPX2 | 2.006298 | 5.262751 | 3.63E-22 | 2.75E-21 |
| ASPRV1 | -1.02286 | 0.153123 | 3.70E-22 | 2.81E-21 |
| SPTB | 3.338487 | 5.010116 | 3.73E-22 | 2.83E-21 |
| H4C5 | 5.132813 | 1.296454 | 3.75E-22 | 2.84E-21 |
| CYP7A1 | -1.66225 | -3.41147 | 3.80E-22 | 2.88E-21 |
| CXCL14 | 4.33534 | 7.379575 | 3.95E-22 | 2.99E-21 |
| GNG4 | 4.437313 | 3.543968 | 3.98E-22 | 3.01E-21 |
| CFAP58 | -1.8356 | 0.763249 | 4.10E-22 | 3.10E-21 |
| MEIS1 | -1.05165 | 4.073932 | 4.28E-22 | 3.23E-21 |
| MEST | 1.296674 | 5.949265 | 4.29E-22 | 3.23E-21 |
| PLEKHG6 | 1.718023 | 3.866719 | 4.33E-22 | 3.26E-21 |
| STK31 | 2.065222 | 2.633939 | 4.37E-22 | 3.29E-21 |
| C20orf144 | 1.854129 | -0.70818 | 4.53E-22 | 3.40E-21 |
| ANXA8L1 | -2.42611 | 1.149719 | 4.64E-22 | 3.48E-21 |
| ID3 | -1.12371 | 5.746571 | 4.66E-22 | 3.50E-21 |
| UCN2 | 4.12028 | -1.19488 | 4.83E-22 | 3.63E-21 |
| HGD | 3.835488 | 4.669058 | 5.24E-22 | 3.93E-21 |
| FAM83H | 1.214387 | 7.168071 | 5.29E-22 | 3.97E-21 |
| FGF19 | 8.967795 | 1.422379 | 5.39E-22 | 4.04E-21 |
| H2AC11 | 3.261723 | 1.469842 | 5.40E-22 | 4.04E-21 |
| H2BC18 | 2.863633 | 1.793314 | 5.55E-22 | 4.16E-21 |
| SHOX2 | 3.518686 | 1.391662 | 5.64E-22 | 4.22E-21 |
| FAM53A | 1.367339 | 1.248244 | 5.68E-22 | 4.24E-21 |
| LRRC46 | -1.82734 | 3.145682 | 5.72E-22 | 4.28E-21 |
| CT83 | 6.607199 | 2.088359 | 5.75E-22 | 4.30E-21 |
| RGS22 | -1.89737 | 1.6105 | 5.77E-22 | 4.30E-21 |
| SUSD2 | -2.00775 | 8.048002 | 5.88E-22 | 4.39E-21 |
| CLDN10 | 4.137912 | 4.36547 | 6.04E-22 | 4.50E-21 |
| NECTIN1 | 1.622139 | 5.805212 | 6.19E-22 | 4.61E-21 |
| TUBB2B | 4.012016 | 3.820277 | 6.20E-22 | 4.61E-21 |
| IL11 | 2.722188 | 0.901568 | 6.24E-22 | 4.65E-21 |
| MRPL24 | 1.119004 | 6.085906 | 6.32E-22 | 4.70E-21 |
| KIF18A | 1.405402 | 2.969311 | 6.39E-22 | 4.75E-21 |
| ADAMTS12 | 1.864087 | 4.920292 | 6.43E-22 | 4.77E-21 |
| TMEM82 | 4.77198 | -1.0179 | 6.45E-22 | 4.79E-21 |
| IRF7 | 1.299598 | 5.8049 | 6.58E-22 | 4.88E-21 |
| ANO9 | 1.694532 | 5.326972 | 6.67E-22 | 4.95E-21 |
| DSG2 | 1.476539 | 7.691247 | 7.05E-22 | 5.22E-21 |
| NHLRC4 | -1.55267 | 0.992338 | 7.27E-22 | 5.38E-21 |
| GBP4 | -1.29214 | 6.26183 | 7.40E-22 | 5.48E-21 |
| RASGEF1A | 2.018158 | 3.721247 | 7.58E-22 | 5.61E-21 |
| IER5L | 1.771684 | 3.447256 | 7.83E-22 | 5.79E-21 |
| SLA | -1.10042 | 5.395804 | 8.76E-22 | 6.46E-21 |
| NAT8L | 3.380534 | 2.070389 | 9.17E-22 | 6.77E-21 |
| DMRTA2 | 5.071571 | 1.317308 | 9.23E-22 | 6.81E-21 |
| GAL | 5.408817 | 2.023065 | 9.39E-22 | 6.93E-21 |
| TLCD2 | -1.0013 | 4.176685 | 9.47E-22 | 6.98E-21 |
| CELA2B | -1.45981 | -2.11018 | 9.63E-22 | 7.09E-21 |
| CBY2 | 4.943524 | -0.60305 | 1.01E-21 | 7.44E-21 |
| AIM2 | 2.844838 | 3.478659 | 1.01E-21 | 7.47E-21 |
| ADGRG1 | 1.420757 | 7.613977 | 1.03E-21 | 7.59E-21 |
| CDH24 | 1.566973 | 3.843523 | 1.04E-21 | 7.61E-21 |
| H4C8 | 2.076767 | 3.313878 | 1.04E-21 | 7.62E-21 |
| ABCA4 | 3.723114 | 4.548323 | 1.09E-21 | 8.03E-21 |
| REEP6 | 2.262271 | 4.474064 | 1.15E-21 | 8.47E-21 |
| TMEM145 | 2.934839 | 0.540794 | 1.17E-21 | 8.58E-21 |
| AZIN2 | 1.321889 | 3.284794 | 1.21E-21 | 8.87E-21 |
| AQP9 | -1.53756 | 4.049708 | 1.21E-21 | 8.87E-21 |
| SERPINA4 | 8.13633 | 1.773563 | 1.23E-21 | 8.97E-21 |
| TLCD3B | 3.103719 | -1.28624 | 1.23E-21 | 8.97E-21 |
| RPH3A | -1.86414 | -1.4222 | 1.24E-21 | 9.10E-21 |
| POU4F1 | 5.306732 | 0.127646 | 1.25E-21 | 9.11E-21 |
| LCN12 | 2.466096 | 1.299915 | 1.26E-21 | 9.23E-21 |
| CXCL12 | -1.24246 | 5.568327 | 1.38E-21 | 1.01E-20 |
| KRTAP5-1 | 2.210952 | 0.11147 | 1.39E-21 | 1.01E-20 |
| LIPK | 6.474758 | -1.46692 | 1.46E-21 | 1.07E-20 |
| TMEM52 | 2.022945 | 1.480374 | 1.48E-21 | 1.08E-20 |
| POU3F2 | 6.884647 | 2.273212 | 1.52E-21 | 1.11E-20 |
| SRM | 1.052204 | 6.091995 | 1.52E-21 | 1.11E-20 |
| SLC35A2 | 1.024781 | 6.055364 | 1.60E-21 | 1.17E-20 |
| CPS1 | 6.660939 | 7.954868 | 1.68E-21 | 1.22E-20 |
| UQCC3 | 1.112331 | 2.727853 | 1.68E-21 | 1.22E-20 |
| RASSF8 | -1.25506 | 5.017068 | 1.78E-21 | 1.29E-20 |
| CHPF | 1.27013 | 7.360208 | 1.79E-21 | 1.30E-20 |
| DENND2C | -1.08669 | 2.027218 | 1.84E-21 | 1.33E-20 |
| TSKU | 1.77054 | 6.324381 | 1.85E-21 | 1.34E-20 |
| DEPTOR | 1.567616 | 4.863666 | 1.86E-21 | 1.35E-20 |
| IGF2BP1 | 6.420935 | 3.252181 | 1.91E-21 | 1.38E-20 |
| NCF1 | -1.2815 | 2.668851 | 1.92E-21 | 1.39E-20 |
| SMC1B | 3.531264 | 1.260151 | 1.93E-21 | 1.40E-20 |
| GAS7 | -1.06732 | 5.387263 | 1.99E-21 | 1.44E-20 |
| SLC6A8 | 1.920272 | 5.467148 | 2.00E-21 | 1.45E-20 |
| OR2B6 | 3.512738 | -2.00733 | 2.01E-21 | 1.45E-20 |
| EXOSC5 | 1.209682 | 4.46094 | 2.01E-21 | 1.45E-20 |
| PRSS3 | 5.04509 | 1.497794 | 2.02E-21 | 1.46E-20 |
| FAAP24 | 1.271056 | 2.434385 | 2.03E-21 | 1.46E-20 |
| CKAP2 | 1.135116 | 4.845033 | 2.03E-21 | 1.46E-20 |
| ADAMTS15 | -1.48546 | 2.731873 | 2.20E-21 | 1.58E-20 |
| GNB3 | 1.823933 | 0.221726 | 2.27E-21 | 1.63E-20 |
| IL17C | 4.238702 | -0.11514 | 2.29E-21 | 1.65E-20 |
| H2AC8 | 3.89438 | 1.253851 | 2.35E-21 | 1.68E-20 |
| NRROS | -1.05134 | 3.348475 | 2.35E-21 | 1.69E-20 |
| KRT83 | 5.497378 | -0.28367 | 2.44E-21 | 1.75E-20 |
| TCF19 | 1.201848 | 4.748356 | 2.51E-21 | 1.80E-20 |
| APOBEC1 | 7.242792 | -0.17236 | 2.54E-21 | 1.82E-20 |
| CDK5R1 | 1.581968 | 2.744625 | 2.56E-21 | 1.83E-20 |
| TAS1R3 | 2.261375 | 2.356971 | 2.63E-21 | 1.88E-20 |
| ENC1 | 1.277527 | 6.701602 | 2.63E-21 | 1.88E-20 |
| CBARP | 1.995363 | 0.968822 | 2.67E-21 | 1.91E-20 |
| FGB | 8.951836 | 8.035705 | 2.72E-21 | 1.94E-20 |
| PLAAT1 | 2.817603 | 0.858794 | 2.73E-21 | 1.95E-20 |
| SUGCT | 2.012149 | 2.249099 | 2.79E-21 | 1.99E-20 |
| ANXA10 | 7.526982 | 3.687094 | 2.80E-21 | 2.00E-20 |
| RSPH9 | -1.50613 | 1.662778 | 2.87E-21 | 2.05E-20 |
| H2BC17 | 4.892336 | -0.35439 | 2.91E-21 | 2.07E-20 |
| IL4I1 | 1.956789 | 4.233707 | 3.12E-21 | 2.22E-20 |
| PTGDS | -1.4517 | 1.362489 | 3.14E-21 | 2.24E-20 |
| PRCD | -1.00937 | 0.026532 | 3.18E-21 | 2.26E-20 |
| TMEM171 | 2.894037 | 0.795642 | 3.23E-21 | 2.30E-20 |
| CDKN2B | -1.27842 | 5.013378 | 3.46E-21 | 2.46E-20 |
| GPR37 | 2.753387 | 2.98719 | 3.74E-21 | 2.66E-20 |
| IDH2 | 1.212495 | 7.345424 | 3.76E-21 | 2.67E-20 |
| ATP2A1 | 1.725199 | 0.611072 | 3.84E-21 | 2.72E-20 |
| POLE | 1.010532 | 5.487943 | 3.91E-21 | 2.77E-20 |
| TUBA1A | -1.06189 | 7.400511 | 4.10E-21 | 2.90E-20 |
| KRT81 | 5.930046 | 4.696717 | 4.38E-21 | 3.09E-20 |
| BPIFA2 | 5.329813 | 2.479178 | 4.57E-21 | 3.23E-20 |
| MRPL15 | 1.095116 | 5.847109 | 4.60E-21 | 3.25E-20 |
| ARL9 | 2.45524 | 0.565273 | 4.60E-21 | 3.25E-20 |
| TCEAL7 | -1.22449 | 0.875032 | 4.70E-21 | 3.32E-20 |
| RFX8 | 2.209121 | -0.13403 | 4.73E-21 | 3.34E-20 |
| GPRC5A | -1.28838 | 9.569411 | 4.76E-21 | 3.35E-20 |
| DEPDC7 | 2.568695 | 2.088189 | 4.85E-21 | 3.42E-20 |
| PCDH9 | -1.87508 | 2.887408 | 4.95E-21 | 3.49E-20 |
| TEKT5 | 2.391393 | -0.56819 | 4.96E-21 | 3.49E-20 |
| C17orf58 | 1.010325 | 3.820037 | 5.04E-21 | 3.54E-20 |
| FAM43A | -1.16438 | 3.525108 | 5.11E-21 | 3.59E-20 |
| MUC20 | 2.183917 | 5.519723 | 5.18E-21 | 3.64E-20 |
| WDR76 | 1.172505 | 3.529775 | 5.44E-21 | 3.82E-20 |
| CYBB | -1.30952 | 7.219164 | 5.45E-21 | 3.82E-20 |
| FAM131C | 3.450756 | -1.33124 | 5.61E-21 | 3.93E-20 |
| RD3 | -1.85365 | -2.5026 | 5.73E-21 | 4.02E-20 |
| PLA2G2C | 2.080168 | 0.642628 | 5.73E-21 | 4.02E-20 |
| MUSK | -1.85302 | 0.358241 | 5.96E-21 | 4.17E-20 |
| ZMYND10 | -1.94362 | 3.412096 | 6.00E-21 | 4.20E-20 |
| ALDH1B1 | 1.102071 | 5.446394 | 6.07E-21 | 4.24E-20 |
| LY6D | 5.661265 | 2.473547 | 6.27E-21 | 4.38E-20 |
| CFAP52 | -2.05547 | 1.988642 | 6.31E-21 | 4.41E-20 |
| CDH19 | -2.18785 | 0.069279 | 6.50E-21 | 4.54E-20 |
| PLAGL1 | -1.15581 | 4.342845 | 6.99E-21 | 4.87E-20 |
| BST1 | -1.16365 | 2.960257 | 7.12E-21 | 4.95E-20 |
| C12orf56 | 4.843106 | 1.189276 | 7.35E-21 | 5.11E-20 |
| FOXO6 | 2.302577 | 2.332112 | 7.44E-21 | 5.17E-20 |
| FAM241B | 1.109552 | 3.71278 | 7.99E-21 | 5.55E-20 |
| POLB | 1.188018 | 5.006207 | 8.50E-21 | 5.90E-20 |
| HOXA10 | 4.110465 | 1.209887 | 8.53E-21 | 5.91E-20 |
| UGDH | 1.920517 | 7.477176 | 8.71E-21 | 6.04E-20 |
| HPRT1 | 1.053997 | 5.325693 | 8.94E-21 | 6.19E-20 |
| COL13A1 | -1.25132 | 3.003341 | 9.10E-21 | 6.29E-20 |
| UNC93A | 5.949822 | -1.12383 | 9.15E-21 | 6.33E-20 |
| CPXM1 | 2.038338 | 3.993432 | 9.28E-21 | 6.42E-20 |
| CEACAM7 | 5.372528 | 3.441161 | 9.51E-21 | 6.57E-20 |
| KLHL23 | 1.181307 | 4.804981 | 9.53E-21 | 6.58E-20 |
| CCDC178 | -1.95505 | -1.83835 | 9.68E-21 | 6.68E-20 |
| GFAP | 2.895815 | 0.123796 | 1.00E-20 | 6.91E-20 |
| HORMAD1 | 4.450488 | 2.666903 | 1.02E-20 | 7.04E-20 |
| SPOCK1 | 3.139123 | 4.053926 | 1.02E-20 | 7.04E-20 |
| ZNF724 | 1.827002 | -0.22786 | 1.05E-20 | 7.26E-20 |
| AATK | -1.40791 | 4.533594 | 1.06E-20 | 7.31E-20 |
| AGTR1 | -1.7847 | 1.716259 | 1.06E-20 | 7.32E-20 |
| H4C12 | 2.497562 | -1.26677 | 1.07E-20 | 7.38E-20 |
| TRAF2 | 1.052004 | 5.103224 | 1.08E-20 | 7.39E-20 |
| DNTTIP1 | 1.564661 | 6.181198 | 1.10E-20 | 7.53E-20 |
| CNGB1 | 2.970999 | 1.507108 | 1.11E-20 | 7.65E-20 |
| C8orf76 | 1.190234 | 1.967933 | 1.16E-20 | 7.95E-20 |
| BORA | 1.128368 | 2.299787 | 1.17E-20 | 8.05E-20 |
| COX6B2 | 3.188771 | -0.28793 | 1.19E-20 | 8.15E-20 |
| TRIM54 | 3.705069 | 1.365099 | 1.19E-20 | 8.17E-20 |
| KLRF1 | -1.53065 | 0.49234 | 1.21E-20 | 8.25E-20 |
| FCGR3A | -1.2468 | 7.063911 | 1.23E-20 | 8.41E-20 |
| SLC16A9 | 3.226009 | 4.825212 | 1.24E-20 | 8.46E-20 |
| LCTL | 1.718883 | -1.78853 | 1.24E-20 | 8.48E-20 |
| PLEKHA6 | 1.654703 | 5.930592 | 1.29E-20 | 8.79E-20 |
| ALOXE3 | 2.752365 | -0.50927 | 1.30E-20 | 8.85E-20 |
| C7 | -1.76437 | 6.958426 | 1.33E-20 | 9.06E-20 |
| AP1G2 | 1.076317 | 4.986894 | 1.34E-20 | 9.10E-20 |
| MSH5 | 1.70708 | 1.382379 | 1.39E-20 | 9.46E-20 |
| NFE2L3 | 1.476901 | 4.915629 | 1.42E-20 | 9.65E-20 |
| SLCO1A2 | -2.67586 | 1.632124 | 1.49E-20 | 1.01E-19 |
| TNFAIP3 | -1.1002 | 6.251849 | 1.49E-20 | 1.01E-19 |
| DBN1 | 1.175135 | 6.834285 | 1.55E-20 | 1.05E-19 |
| GATA5 | -1.55317 | 0.313481 | 1.59E-20 | 1.08E-19 |
| NKAIN3 | 4.654332 | 0.940779 | 1.61E-20 | 1.09E-19 |
| KCNQ3 | 2.021488 | 5.276504 | 1.68E-20 | 1.13E-19 |
| CHI3L2 | -1.70925 | 4.668616 | 1.73E-20 | 1.17E-19 |
| LINGO1 | 2.513348 | 2.536841 | 1.82E-20 | 1.23E-19 |
| TINCR | -1.92105 | 2.147337 | 1.83E-20 | 1.24E-19 |
| H3C3 | 6.967166 | -0.12709 | 1.83E-20 | 1.24E-19 |
| KRTCAP3 | 1.58579 | 5.726561 | 1.86E-20 | 1.26E-19 |
| CFAP53 | -1.56346 | 1.94379 | 1.89E-20 | 1.27E-19 |
| KRT16 | 4.796685 | 4.030785 | 2.00E-20 | 1.35E-19 |
| SPTSSB | 4.521757 | 2.602016 | 2.01E-20 | 1.36E-19 |
| H3C2 | 7.029434 | 0.530481 | 2.01E-20 | 1.36E-19 |
| SLC22A18AS | 1.711749 | 1.913948 | 2.03E-20 | 1.37E-19 |
| ABCC2 | 4.841296 | 4.550189 | 2.07E-20 | 1.39E-19 |
| WNT2B | -1.15945 | 2.306667 | 2.15E-20 | 1.45E-19 |
| CDH1 | 1.0346 | 8.790815 | 2.19E-20 | 1.47E-19 |
| PPP1R35 | 1.305461 | 3.023556 | 2.19E-20 | 1.47E-19 |
| ITM2C | 1.230073 | 7.29167 | 2.23E-20 | 1.49E-19 |
| PAK6 | 1.093491 | 4.315208 | 2.31E-20 | 1.55E-19 |
| DOCK8 | -1.01741 | 5.934717 | 2.37E-20 | 1.59E-19 |
| CMTM1 | 1.181509 | 0.240753 | 2.40E-20 | 1.61E-19 |
| TAF7L | 4.308274 | -0.22832 | 2.42E-20 | 1.62E-19 |
| LCP1 | -1.06438 | 7.902153 | 2.42E-20 | 1.62E-19 |
| OTUB2 | 1.260016 | 1.988865 | 2.45E-20 | 1.64E-19 |
| SMCO2 | 2.482619 | -1.17126 | 2.47E-20 | 1.65E-19 |
| PLEKHH2 | -1.27067 | 4.785094 | 2.54E-20 | 1.70E-19 |
| KCNQ5 | 2.702826 | 2.402544 | 2.58E-20 | 1.72E-19 |
| CNGA3 | 4.822561 | 2.826319 | 2.60E-20 | 1.73E-19 |
| TMEM59L | 4.193047 | 4.665089 | 2.73E-20 | 1.82E-19 |
| BET1 | 1.025796 | 5.269875 | 2.76E-20 | 1.84E-19 |
| LEFTY2 | -1.86902 | 0.220354 | 2.84E-20 | 1.89E-19 |
| SPRY4 | -1.09464 | 6.262405 | 2.85E-20 | 1.90E-19 |
| RCN3 | 1.775641 | 5.472323 | 2.86E-20 | 1.90E-19 |
| ABCB4 | 2.168149 | 1.328303 | 2.90E-20 | 1.93E-19 |
| FOXB1 | 4.732828 | 0.63675 | 2.91E-20 | 1.93E-19 |
| SLC16A14 | 2.94587 | 5.284123 | 3.00E-20 | 1.99E-19 |
| TCTEX1D1 | -1.63338 | 0.995847 | 3.00E-20 | 1.99E-19 |
| NETO2 | 1.427473 | 4.833805 | 3.01E-20 | 1.99E-19 |
| ANKS4B | 6.374366 | 1.863748 | 3.48E-20 | 2.30E-19 |
| GLIPR1L2 | -1.28273 | -0.12834 | 3.55E-20 | 2.35E-19 |
| SRPX | -1.53788 | 3.75767 | 3.60E-20 | 2.38E-19 |
| SYT2 | 2.869223 | 2.181944 | 3.63E-20 | 2.40E-19 |
| GRIP1 | 1.597015 | 2.313766 | 3.84E-20 | 2.54E-19 |
| CDC7 | 1.298033 | 3.501123 | 3.92E-20 | 2.58E-19 |
| MYL6B | 1.058877 | 4.799825 | 3.95E-20 | 2.60E-19 |
| ADAMTS16 | 2.334284 | 2.748582 | 3.95E-20 | 2.60E-19 |
| SKP2 | 1.307332 | 4.702927 | 3.98E-20 | 2.62E-19 |
| IGLL5 | 2.480666 | 1.683308 | 4.06E-20 | 2.67E-19 |
| PCSK1 | 6.646712 | 5.736514 | 4.47E-20 | 2.93E-19 |
| BRDT | 6.152452 | 2.824584 | 4.49E-20 | 2.94E-19 |
| PERM1 | 2.581859 | -1.42437 | 4.57E-20 | 3.00E-19 |
| ALB | 9.076924 | 6.756855 | 4.62E-20 | 3.03E-19 |
| C1orf194 | -2.19384 | 2.006822 | 4.65E-20 | 3.04E-19 |
| PDX1 | 8.063499 | 0.566586 | 4.76E-20 | 3.11E-19 |
| FKBP10 | 1.823992 | 7.195345 | 4.78E-20 | 3.13E-19 |
| H1-5 | 7.490348 | 1.717858 | 4.79E-20 | 3.13E-19 |
| NR2E1 | 4.618318 | -1.33426 | 4.84E-20 | 3.17E-19 |
| CKMT1A | 2.875715 | 1.454493 | 4.89E-20 | 3.19E-19 |
| SLC16A8 | 2.239262 | 0.737896 | 5.00E-20 | 3.27E-19 |
| CNPY2 | 1.027772 | 1.833664 | 5.01E-20 | 3.27E-19 |
| CLDN3 | 2.030921 | 6.621603 | 5.09E-20 | 3.32E-19 |
| RHEX | -1.59201 | 1.061503 | 5.13E-20 | 3.35E-19 |
| RBP4 | -1.97752 | 3.361378 | 5.16E-20 | 3.36E-19 |
| PAH | 6.162761 | 2.57175 | 5.17E-20 | 3.37E-19 |
| GLRA3 | 3.959961 | 1.079072 | 5.29E-20 | 3.45E-19 |
| CAPN5 | 1.979434 | 5.883634 | 5.65E-20 | 3.67E-19 |
| JAK3 | 1.143571 | 4.934121 | 5.71E-20 | 3.71E-19 |
| CKMT1B | 2.947379 | 1.764497 | 5.82E-20 | 3.78E-19 |
| SNTN | -2.19928 | 3.26183 | 5.98E-20 | 3.88E-19 |
| DAPK1 | -1.05225 | 6.813497 | 6.08E-20 | 3.94E-19 |
| KHDC1 | 1.206152 | 1.307208 | 6.13E-20 | 3.97E-19 |
| ZNF280B | 1.962696 | 2.010795 | 6.15E-20 | 3.99E-19 |
| SCARF1 | -1.07942 | 4.57018 | 6.15E-20 | 3.99E-19 |
| RGS20 | 2.910507 | 1.133857 | 6.22E-20 | 4.03E-19 |
| GSDMC | 2.572829 | 3.073188 | 6.32E-20 | 4.09E-19 |
| REXO5 | 1.058134 | 2.370134 | 6.35E-20 | 4.11E-19 |
| AJAP1 | -1.77547 | 0.102549 | 6.57E-20 | 4.25E-19 |
| DIRAS1 | 2.621615 | 2.733857 | 6.95E-20 | 4.49E-19 |
| KCNE1 | -1.56215 | 0.344189 | 7.03E-20 | 4.54E-19 |
| CPD | 1.459782 | 8.544213 | 7.19E-20 | 4.64E-19 |
| SDC2 | -1.08266 | 5.926859 | 7.23E-20 | 4.67E-19 |
| APBA2 | 2.031913 | 4.329495 | 7.41E-20 | 4.78E-19 |
| NPC1L1 | 4.427404 | 2.377669 | 7.55E-20 | 4.86E-19 |
| E2F1 | 1.497354 | 4.580933 | 7.55E-20 | 4.86E-19 |
| COA6 | 1.176564 | 4.368979 | 7.84E-20 | 5.04E-19 |
| HOXC11 | 6.81844 | 1.526014 | 8.00E-20 | 5.14E-19 |
| NKX3-2 | 3.537109 | -1.08633 | 8.05E-20 | 5.17E-19 |
| PAX9 | 2.750711 | 3.896281 | 8.10E-20 | 5.20E-19 |
| SLC15A1 | 4.020421 | 2.095472 | 8.13E-20 | 5.22E-19 |
| SOX11 | 4.861517 | 2.3897 | 8.41E-20 | 5.39E-19 |
| PLA2G4A | 2.462234 | 5.935413 | 8.44E-20 | 5.41E-19 |
| MATN3 | -1.47526 | 3.440995 | 8.63E-20 | 5.53E-19 |
| NFATC4 | 1.227247 | 5.363422 | 8.68E-20 | 5.56E-19 |
| PAQR5 | -1.37614 | 3.691398 | 8.98E-20 | 5.74E-19 |
| MPHOSPH9 | 1.026357 | 4.120041 | 9.02E-20 | 5.77E-19 |
| B4GALT4 | 1.056575 | 5.046813 | 9.10E-20 | 5.82E-19 |
| FLRT1 | 2.001144 | -0.54223 | 9.26E-20 | 5.92E-19 |
| CX3CR1 | -1.54179 | 2.729205 | 9.38E-20 | 5.99E-19 |
| COMP | 2.918167 | 5.540311 | 9.52E-20 | 6.07E-19 |
| TRIM2 | 1.458825 | 6.697736 | 9.61E-20 | 6.13E-19 |
| HSF4 | 1.956361 | 4.166264 | 9.87E-20 | 6.29E-19 |
| INHBE | 4.851178 | -0.57011 | 1.00E-19 | 6.40E-19 |
| ESPN | 2.285459 | 3.898908 | 1.01E-19 | 6.43E-19 |
| SPINK4 | 8.929614 | 4.034721 | 1.03E-19 | 6.58E-19 |
| RUNX1T1 | -1.23579 | 2.772192 | 1.05E-19 | 6.66E-19 |
| ALKBH6 | 1.39443 | 0.851267 | 1.07E-19 | 6.79E-19 |
| GPR35 | 2.392377 | 3.199797 | 1.07E-19 | 6.80E-19 |
| CTSG | -1.83469 | 0.94596 | 1.07E-19 | 6.80E-19 |
| S100A2 | 3.393606 | 5.61806 | 1.07E-19 | 6.80E-19 |
| SMKR1 | 2.808823 | 2.119255 | 1.07E-19 | 6.80E-19 |
| LAGE3 | 1.213255 | 4.594305 | 1.10E-19 | 6.95E-19 |
| H2BC4 | 2.281672 | 3.092609 | 1.11E-19 | 7.04E-19 |
| DYNLRB2 | -1.97571 | 0.982625 | 1.12E-19 | 7.08E-19 |
| BECN2 | 3.970388 | -2.74289 | 1.13E-19 | 7.15E-19 |
| BNIP3 | 1.187439 | 6.458375 | 1.15E-19 | 7.25E-19 |
| PRR5-ARHGAP8 | 2.260807 | -1.78495 | 1.15E-19 | 7.26E-19 |
| SMAD9 | -1.40137 | 3.584034 | 1.27E-19 | 7.99E-19 |
| H2AC14 | 6.674312 | -0.80421 | 1.28E-19 | 8.06E-19 |
| CACNB3 | 1.18291 | 5.335528 | 1.28E-19 | 8.11E-19 |
| C9orf50 | 2.120667 | -0.94545 | 1.32E-19 | 8.34E-19 |
| DIO2 | 2.41943 | 3.943359 | 1.35E-19 | 8.53E-19 |
| ABCC11 | 2.607847 | -0.69028 | 1.36E-19 | 8.60E-19 |
| ZBTB12 | 1.263109 | 2.568453 | 1.36E-19 | 8.60E-19 |
| SRCIN1 | 1.854382 | 4.025457 | 1.47E-19 | 9.23E-19 |
| XAGE1A | 5.255074 | -1.77106 | 1.49E-19 | 9.35E-19 |
| MOB3B | -1.01554 | 4.25374 | 1.49E-19 | 9.39E-19 |
| QPCT | 2.67184 | 5.644758 | 1.51E-19 | 9.48E-19 |
| AC005551.1 | 5.29004 | -2.69148 | 1.54E-19 | 9.68E-19 |
| RGS14 | 1.043881 | 4.76637 | 1.56E-19 | 9.79E-19 |
| ACOT11 | 1.210515 | 2.925885 | 1.59E-19 | 1.00E-18 |
| NAXE | 1.104319 | 7.062239 | 1.60E-19 | 1.00E-18 |
| ACAD8 | 1.326405 | 5.935383 | 1.61E-19 | 1.01E-18 |
| ANKRD18A | 2.020683 | 1.060622 | 1.72E-19 | 1.08E-18 |
| DDO | -1.29073 | 1.848473 | 1.77E-19 | 1.11E-18 |
| KIF5A | 2.704046 | 1.090242 | 1.77E-19 | 1.11E-18 |
| AP001931.2 | 1.995827 | -2.3364 | 1.81E-19 | 1.13E-18 |
| TRIM58 | -2.07219 | 0.917885 | 1.81E-19 | 1.13E-18 |
| GPR84 | 1.888419 | 1.778488 | 1.84E-19 | 1.15E-18 |
| H4C9 | 1.366378 | 3.669483 | 1.86E-19 | 1.16E-18 |
| TTLL7 | -1.47845 | 3.120599 | 1.89E-19 | 1.18E-18 |
| CADM1 | -1.34365 | 7.055028 | 1.97E-19 | 1.23E-18 |
| DPT | -1.43459 | 3.167593 | 1.98E-19 | 1.23E-18 |
| PPP4R4 | -1.71301 | 1.269663 | 1.98E-19 | 1.23E-18 |
| GPR78 | 4.374775 | -0.274 | 2.06E-19 | 1.28E-18 |
| DYDC2 | -1.93351 | 1.300825 | 2.08E-19 | 1.30E-18 |
| NUP62CL | 1.479523 | 1.882571 | 2.12E-19 | 1.32E-18 |
| DOK5 | 2.283145 | 1.902723 | 2.12E-19 | 1.32E-18 |
| SLCO1B3 | 6.855758 | 1.414496 | 2.16E-19 | 1.34E-18 |
| TSHR | 3.034621 | 0.415346 | 2.17E-19 | 1.35E-18 |
| FAM216B | -2.33367 | 3.324335 | 2.22E-19 | 1.38E-18 |
| PRSS22 | 1.693857 | 4.950165 | 2.31E-19 | 1.43E-18 |
| CHD1L | 1.738162 | -0.37881 | 2.34E-19 | 1.45E-18 |
| REG4 | 10.59323 | 5.993126 | 2.35E-19 | 1.45E-18 |
| RAB44 | -1.41928 | -0.44492 | 2.43E-19 | 1.50E-18 |
| PRRG3 | -1.43068 | 0.480077 | 2.47E-19 | 1.53E-18 |
| EPS8L3 | 7.216346 | 2.968446 | 2.50E-19 | 1.54E-18 |
| CCDC170 | -1.59077 | 3.459178 | 2.51E-19 | 1.55E-18 |
| MTMR11 | 1.442747 | 4.865986 | 2.54E-19 | 1.57E-18 |
| PDZRN3 | -1.07518 | 3.657401 | 2.60E-19 | 1.60E-18 |
| XKR9 | 2.231964 | 1.81777 | 2.65E-19 | 1.64E-18 |
| CPT1B | 2.038248 | -0.80955 | 2.66E-19 | 1.64E-18 |
| MS4A4A | -1.16924 | 4.857602 | 2.78E-19 | 1.72E-18 |
| OR51E1 | 3.022181 | -0.14149 | 2.78E-19 | 1.72E-18 |
| SMIM24 | 4.242862 | 1.5071 | 2.80E-19 | 1.72E-18 |
| ANP32E | 1.167331 | 7.020916 | 2.88E-19 | 1.77E-18 |
| RSPH1 | -1.7565 | 3.468538 | 2.92E-19 | 1.80E-18 |
| GALNT6 | 1.863718 | 6.312238 | 3.03E-19 | 1.86E-18 |
| EDN3 | -2.67925 | -1.1978 | 3.07E-19 | 1.89E-18 |
| REEP1 | -1.63834 | 2.297828 | 3.15E-19 | 1.93E-18 |
| NFASC | -1.33323 | 3.543373 | 3.18E-19 | 1.95E-18 |
| CD37 | -1.09357 | 5.279528 | 3.19E-19 | 1.96E-18 |
| UCHL1 | 3.488358 | 6.210048 | 3.24E-19 | 1.99E-18 |
| FAR2 | -1.17754 | 3.379412 | 3.25E-19 | 1.99E-18 |
| MRPL36 | 1.083424 | 4.43472 | 3.30E-19 | 2.02E-18 |
| CRABP1 | 6.039276 | 1.223589 | 3.38E-19 | 2.07E-18 |
| SHOC1 | 3.125681 | 2.066649 | 3.42E-19 | 2.10E-18 |
| TSPAN7 | -1.67381 | 4.741837 | 3.46E-19 | 2.12E-18 |
| MRGPRF | -1.19498 | 2.208761 | 3.50E-19 | 2.14E-18 |
| APOBEC3B | 2.234643 | 2.519419 | 3.72E-19 | 2.27E-18 |
| EPOP | 1.413897 | 3.031908 | 3.72E-19 | 2.28E-18 |
| CLDN4 | 1.185598 | 8.8807 | 3.76E-19 | 2.29E-18 |
| APOC1 | -1.37306 | 5.655922 | 3.76E-19 | 2.29E-18 |
| ANKRD61 | 1.7445 | 0.123585 | 3.76E-19 | 2.30E-18 |
| CHRNB1 | 1.115823 | 3.928365 | 3.86E-19 | 2.35E-18 |
| SEZ6L2 | 1.740607 | 6.701664 | 3.94E-19 | 2.40E-18 |
| FNDC1 | 2.423857 | 5.459152 | 4.05E-19 | 2.46E-18 |
| PPP1R16B | -1.14108 | 4.410752 | 4.05E-19 | 2.47E-18 |
| CLPSL1 | 4.871577 | -1.37121 | 4.19E-19 | 2.55E-18 |
| ARHGAP11B | 1.933462 | -0.78156 | 4.25E-19 | 2.58E-18 |
| SLC46A2 | -1.90976 | 2.796014 | 4.45E-19 | 2.70E-18 |
| DUSP4 | 2.454744 | 6.822582 | 4.53E-19 | 2.75E-18 |
| CCDC65 | -1.21244 | 2.183479 | 4.63E-19 | 2.81E-18 |
| NR2F6 | 1.015067 | 5.790158 | 4.81E-19 | 2.91E-18 |
| GNGT2 | -1.06786 | 1.481916 | 4.82E-19 | 2.92E-18 |
| MUC21 | 3.80143 | 6.61677 | 4.88E-19 | 2.96E-18 |
| RHCE | 2.012571 | 0.808536 | 4.91E-19 | 2.97E-18 |
| S100A12 | -1.95099 | 0.153282 | 4.96E-19 | 3.00E-18 |
| TPTE2 | 2.503458 | -1.77019 | 5.13E-19 | 3.10E-18 |
| EMC9 | 1.048127 | 3.326968 | 5.14E-19 | 3.11E-18 |
| FAM3C | 1.257351 | 6.121704 | 5.15E-19 | 3.11E-18 |
| SPATS1 | -2.1052 | -2.82174 | 5.40E-19 | 3.26E-18 |
| MROH9 | -2.26569 | -0.29915 | 5.54E-19 | 3.34E-18 |
| BCO1 | 2.538975 | 1.309981 | 5.60E-19 | 3.38E-18 |
| GRID2IP | 1.263148 | 1.235741 | 5.76E-19 | 3.47E-18 |
| ADA2 | -1.01288 | 6.820251 | 5.82E-19 | 3.51E-18 |
| TDRD5 | 3.687249 | 1.92527 | 5.86E-19 | 3.53E-18 |
| FAT3 | -1.89612 | 1.567892 | 5.99E-19 | 3.60E-18 |
| HSD17B1 | 2.057879 | 0.130107 | 6.06E-19 | 3.65E-18 |
| NKAIN4 | 3.244618 | 0.699824 | 6.10E-19 | 3.67E-18 |
| DDR2 | -1.08012 | 5.270387 | 6.14E-19 | 3.69E-18 |
| SRRM5 | 1.368234 | -0.07239 | 6.19E-19 | 3.72E-18 |
| LMNB2 | 1.046476 | 6.372554 | 6.26E-19 | 3.76E-18 |
| G6PC2 | -2.33436 | -3.64255 | 6.33E-19 | 3.80E-18 |
| KLK6 | 6.492903 | 2.26494 | 6.86E-19 | 4.12E-18 |
| SRMS | 2.473891 | 0.963544 | 7.09E-19 | 4.26E-18 |
| MYOCD | -1.70569 | 1.533175 | 7.17E-19 | 4.30E-18 |
| SPATA4 | -1.97144 | -0.69734 | 7.54E-19 | 4.52E-18 |
| ACSBG1 | -1.56481 | -0.23859 | 7.71E-19 | 4.61E-18 |
| ADSS1 | 1.716938 | 4.19077 | 7.73E-19 | 4.62E-18 |
| EGF | 2.245579 | 3.48828 | 7.90E-19 | 4.72E-18 |
| OLFML2A | -1.14455 | 4.99537 | 8.04E-19 | 4.80E-18 |
| TUBA4B | -2.1936 | 1.560348 | 8.07E-19 | 4.82E-18 |
| GRIN2D | 2.54527 | 2.956873 | 8.10E-19 | 4.84E-18 |
| CDH23 | -1.20787 | 2.775838 | 8.17E-19 | 4.87E-18 |
| PPP1R32 | -1.29551 | 1.619421 | 8.87E-19 | 5.29E-18 |
| TRIM67 | 2.430724 | -1.17326 | 9.04E-19 | 5.39E-18 |
| TCTE1 | -2.17056 | 0.547634 | 9.28E-19 | 5.53E-18 |
| SLC27A6 | -2.41813 | -0.47623 | 9.80E-19 | 5.83E-18 |
| SIGLEC7 | -1.20583 | 1.623945 | 9.83E-19 | 5.85E-18 |
| PLA2G1B | -2.15359 | 2.694288 | 1.00E-18 | 5.94E-18 |
| BMP8B | 1.255354 | 3.139883 | 1.04E-18 | 6.18E-18 |
| SLC8A3 | -1.51221 | -0.49045 | 1.06E-18 | 6.26E-18 |
| HOXC10 | 6.070979 | 2.517883 | 1.09E-18 | 6.47E-18 |
| ELMO3 | 1.164175 | 5.59171 | 1.12E-18 | 6.65E-18 |
| SOHLH2 | 4.649964 | 0.11908 | 1.15E-18 | 6.82E-18 |
| GALE | 1.099537 | 6.435537 | 1.17E-18 | 6.90E-18 |
| ZNF367 | 1.2482 | 2.777817 | 1.24E-18 | 7.33E-18 |
| EN2 | 4.163609 | -0.26095 | 1.27E-18 | 7.51E-18 |
| ZNF670-ZNF695 | 3.383315 | -2.61224 | 1.29E-18 | 7.60E-18 |
| LRRC4B | -1.30621 | 1.222242 | 1.31E-18 | 7.71E-18 |
| CCDC198 | 5.468047 | 0.905631 | 1.32E-18 | 7.76E-18 |
| FKBP4 | 1.161936 | 6.59215 | 1.34E-18 | 7.89E-18 |
| C2CD6 | 2.27113 | 1.63212 | 1.34E-18 | 7.89E-18 |
| TIGD3 | 1.50122 | 0.261343 | 1.36E-18 | 8.02E-18 |
| CAPN12 | 1.788545 | 3.089049 | 1.38E-18 | 8.12E-18 |
| KRT8 | 1.307654 | 10.22381 | 1.39E-18 | 8.17E-18 |
| C1orf21 | -1.05055 | 5.659621 | 1.40E-18 | 8.24E-18 |
| RETREG1 | -1.39367 | 4.098819 | 1.44E-18 | 8.45E-18 |
| STRC | 2.925133 | -2.14934 | 1.45E-18 | 8.49E-18 |
| RPL17 | 1.141526 | 2.020802 | 1.52E-18 | 8.90E-18 |
| BCL2L12 | 1.011153 | 4.165537 | 1.57E-18 | 9.19E-18 |
| FOXH1 | 4.214584 | -0.93955 | 1.59E-18 | 9.29E-18 |
| GCSH | 1.152201 | 0.299277 | 1.61E-18 | 9.44E-18 |
| WDR86 | 2.334202 | 3.07512 | 1.65E-18 | 9.67E-18 |
| DKK3 | -1.08809 | 6.606696 | 1.71E-18 | 9.98E-18 |
| OPLAH | 1.379038 | 4.885892 | 1.72E-18 | 1.01E-17 |
| PTK6 | 1.761102 | 4.993792 | 1.73E-18 | 1.01E-17 |
| MTFR2 | 1.506043 | 2.060728 | 1.74E-18 | 1.02E-17 |
| KCND2 | 2.268258 | 1.744639 | 1.74E-18 | 1.02E-17 |
| CLDN6 | 5.682512 | 4.404056 | 1.74E-18 | 1.02E-17 |
| NUDT8 | 1.363195 | 3.219416 | 1.79E-18 | 1.04E-17 |
| PDIA2 | 4.761284 | 2.458216 | 1.84E-18 | 1.07E-17 |
| SCLY | 1.075264 | 1.001016 | 1.85E-18 | 1.08E-17 |
| FAM177B | 3.131572 | 2.075504 | 1.86E-18 | 1.08E-17 |
| PHEX | -1.26209 | 1.858904 | 1.87E-18 | 1.09E-17 |
| THPO | 3.091174 | 1.485097 | 1.87E-18 | 1.09E-17 |
| GRHL1 | 1.566198 | 4.465715 | 1.89E-18 | 1.10E-17 |
| UPK3A | 3.138594 | 0.747821 | 1.92E-18 | 1.12E-17 |
| CLEC1B | -1.62875 | -1.43837 | 1.95E-18 | 1.13E-17 |
| SLC12A7 | 1.227038 | 7.545721 | 2.04E-18 | 1.18E-17 |
| GRAMD2A | -1.28541 | 4.759228 | 2.13E-18 | 1.24E-17 |
| NCAPD2 | 1.064459 | 6.557559 | 2.14E-18 | 1.24E-17 |
| PSRC1 | 1.254989 | 3.043184 | 2.17E-18 | 1.26E-17 |
| AHNAK2 | 2.205343 | 6.79018 | 2.22E-18 | 1.29E-17 |
| BPIFB4 | 6.697487 | 1.014772 | 2.24E-18 | 1.30E-17 |
| ELMOD1 | -1.62241 | -0.9595 | 2.27E-18 | 1.32E-17 |
| GPR65 | -1.06765 | 2.717905 | 2.33E-18 | 1.35E-17 |
| GJB3 | 3.286985 | 3.72825 | 2.34E-18 | 1.36E-17 |
| SEMA3B | -1.50863 | 5.664589 | 2.40E-18 | 1.39E-17 |
| IGFBPL1 | 2.297689 | 3.830018 | 2.43E-18 | 1.41E-17 |
| FRAS1 | -1.48793 | 4.534191 | 2.47E-18 | 1.43E-17 |
| DGKA | 1.016496 | 5.097063 | 2.49E-18 | 1.44E-17 |
| SLC39A4 | 1.476861 | 5.829336 | 2.49E-18 | 1.44E-17 |
| CRLF1 | 4.132899 | 7.128819 | 2.51E-18 | 1.45E-17 |
| ACR | -1.4644 | -1.80879 | 2.55E-18 | 1.47E-17 |
| COL6A5 | -1.5777 | 2.766952 | 2.59E-18 | 1.50E-17 |
| TBC1D31 | 1.08051 | 3.320897 | 2.61E-18 | 1.51E-17 |
| FNDC4 | 1.980929 | 3.812595 | 2.62E-18 | 1.51E-17 |
| PF4 | -1.99439 | -0.88685 | 2.72E-18 | 1.56E-17 |
| RGS5 | -1.05052 | 6.848345 | 2.75E-18 | 1.58E-17 |
| DEPDC4 | 1.017929 | 0.035642 | 2.81E-18 | 1.61E-17 |
| TFAP2D | 7.031798 | 0.657545 | 2.87E-18 | 1.65E-17 |
| TRPV1 | 1.370095 | 2.956972 | 2.91E-18 | 1.67E-17 |
| B4GALNT1 | 2.643215 | 2.326735 | 2.92E-18 | 1.68E-17 |
| KIF1A | 5.465146 | 5.222009 | 2.93E-18 | 1.68E-17 |
| CPAMD8 | -1.57082 | 5.275556 | 2.99E-18 | 1.72E-17 |
| CDHR2 | 4.116436 | 2.331323 | 3.06E-18 | 1.75E-17 |
| FAM183A | -1.89866 | 2.171531 | 3.13E-18 | 1.79E-17 |
| PDGFRL | 1.499614 | 4.138257 | 3.35E-18 | 1.91E-17 |
| MYCN | 4.025761 | 2.502202 | 3.51E-18 | 2.01E-17 |
| TBXT | 6.062011 | 0.087545 | 3.56E-18 | 2.03E-17 |
| NCCRP1 | 3.762679 | 3.081934 | 3.59E-18 | 2.05E-17 |
| TMEM232 | -1.75382 | 1.418695 | 3.61E-18 | 2.06E-17 |
| PER1 | -1.14367 | 7.019174 | 3.69E-18 | 2.10E-17 |
| P2RX1 | -1.16718 | 2.276617 | 3.79E-18 | 2.16E-17 |
| SCRIB | 1.103909 | 6.964239 | 3.80E-18 | 2.16E-17 |
| S1PR5 | -1.48722 | 0.589538 | 3.84E-18 | 2.19E-17 |
| UGT2B15 | 6.051115 | 2.250136 | 3.96E-18 | 2.25E-17 |
| REPS2 | -1.03896 | 4.72446 | 4.02E-18 | 2.29E-17 |
| RAB5IF | 1.436791 | 0.765732 | 4.04E-18 | 2.30E-17 |
| SLC25A15 | 1.022979 | 3.928237 | 4.25E-18 | 2.41E-17 |
| DGKI | 2.052572 | 0.603833 | 4.27E-18 | 2.42E-17 |
| MEX3B | 1.13702 | 2.374376 | 4.32E-18 | 2.45E-17 |
| SCUBE3 | 2.392195 | 4.299006 | 4.32E-18 | 2.45E-17 |
| RGS9 | -1.05149 | 2.652414 | 4.35E-18 | 2.46E-17 |
| EFHB | -1.65332 | 1.368513 | 4.48E-18 | 2.54E-17 |
| BCL2A1 | -1.20133 | 3.716734 | 4.84E-18 | 2.74E-17 |
| PTHLH | 2.79995 | 2.386796 | 4.88E-18 | 2.76E-17 |
| EXOSC4 | 1.119959 | 4.205844 | 4.94E-18 | 2.80E-17 |
| SIX2 | 3.327629 | 2.787165 | 5.11E-18 | 2.89E-17 |
| VIP | -1.52769 | -2.491 | 5.20E-18 | 2.94E-17 |
| FSD1 | 2.616018 | -0.07346 | 5.22E-18 | 2.95E-17 |
| NANOS1 | 1.430478 | 1.831485 | 5.32E-18 | 3.00E-17 |
| HOXB13 | 6.465871 | 1.548299 | 5.35E-18 | 3.02E-17 |
| VCAN | 1.777355 | 7.912244 | 5.39E-18 | 3.04E-17 |
| PLXNA3 | 1.056681 | 6.247704 | 5.39E-18 | 3.04E-17 |
| EMP3 | -1.00197 | 5.565605 | 5.46E-18 | 3.07E-17 |
| DDN | 2.401735 | -0.64095 | 5.53E-18 | 3.12E-17 |
| DCHS1 | -1.01776 | 4.738678 | 5.59E-18 | 3.15E-17 |
| MICU3 | -1.02372 | 1.964697 | 5.67E-18 | 3.19E-17 |
| GCLC | 2.271088 | 6.683105 | 5.71E-18 | 3.21E-17 |
| ANKRD66 | -2.29241 | 0.50555 | 6.03E-18 | 3.38E-17 |
| SYT14 | 4.958553 | 0.660704 | 6.04E-18 | 3.39E-17 |
| SMOC1 | 3.85169 | 4.619814 | 6.04E-18 | 3.39E-17 |
| RNF43 | 1.294941 | 4.157284 | 6.08E-18 | 3.41E-17 |
| FOXF2 | -1.2095 | 3.096735 | 6.11E-18 | 3.42E-17 |
| LAIR1 | -1.03761 | 5.612642 | 6.36E-18 | 3.56E-17 |
| FBXL7 | -1.00301 | 3.452313 | 6.38E-18 | 3.57E-17 |
| RAB15 | 1.405176 | 5.929936 | 6.56E-18 | 3.67E-17 |
| FERMT3 | -1.0011 | 5.512075 | 6.72E-18 | 3.76E-17 |
| H3C8 | 3.800197 | 0.175999 | 6.79E-18 | 3.79E-17 |
| NKD1 | -1.59732 | 4.287498 | 6.79E-18 | 3.79E-17 |
| RPL36A | 1.152131 | 1.43594 | 6.80E-18 | 3.80E-17 |
| FAM133A | 5.524135 | 2.308471 | 6.88E-18 | 3.84E-17 |
| NUP210 | 1.13468 | 6.726729 | 6.94E-18 | 3.87E-17 |
| PPP2R3B | 1.042716 | 2.770218 | 6.98E-18 | 3.90E-17 |
| CNGA4 | -1.9401 | 0.473069 | 6.99E-18 | 3.90E-17 |
| SDF2L1 | 1.139488 | 5.138723 | 7.11E-18 | 3.97E-17 |
| C11orf21 | -1.27215 | 1.41059 | 7.17E-18 | 3.99E-17 |
| TINAG | 6.841078 | 0.483655 | 7.30E-18 | 4.06E-17 |
| GRM3 | -1.71097 | -2.50145 | 7.37E-18 | 4.10E-17 |
| EFNA5 | 1.463546 | 5.307618 | 7.47E-18 | 4.15E-17 |
| HCN2 | 2.306918 | 0.761378 | 7.49E-18 | 4.16E-17 |
| PNCK | 3.237788 | 0.926133 | 7.72E-18 | 4.29E-17 |
| FAM166B | -1.78729 | 1.754478 | 7.83E-18 | 4.34E-17 |
| DQX1 | 3.054674 | 0.527735 | 7.87E-18 | 4.37E-17 |
| ZNF726 | 1.643751 | 1.803483 | 8.14E-18 | 4.51E-17 |
| SIGLEC14 | -1.34994 | 2.430568 | 8.17E-18 | 4.53E-17 |
| MMP10 | 3.944805 | 3.127215 | 8.36E-18 | 4.63E-17 |
| SERPINA9 | -2.14072 | -1.70294 | 8.57E-18 | 4.74E-17 |
| SOWAHB | 1.329404 | 4.227293 | 8.96E-18 | 4.95E-17 |
| TBX10 | 5.189731 | -1.02499 | 9.10E-18 | 5.03E-17 |
| CABCOCO1 | -1.77763 | 1.678861 | 9.38E-18 | 5.17E-17 |
| AARD | -1.88418 | 1.64282 | 9.63E-18 | 5.32E-17 |
| TTBK1 | 1.624549 | -0.40885 | 9.69E-18 | 5.34E-17 |
| PSPH | 1.259495 | 4.344565 | 9.77E-18 | 5.38E-17 |
| C1orf87 | -2.38991 | 1.422018 | 9.85E-18 | 5.42E-17 |
| SGPP2 | 1.439317 | 7.383826 | 9.97E-18 | 5.49E-17 |
| CFAP77 | -2.14739 | 1.202207 | 1.01E-17 | 5.55E-17 |
| LRRC25 | -1.04152 | 3.651772 | 1.02E-17 | 5.61E-17 |
| CCNO | 2.172522 | 3.445233 | 1.04E-17 | 5.70E-17 |
| CHMP4C | 1.07541 | 4.584364 | 1.04E-17 | 5.70E-17 |
| FADS6 | 5.129805 | 0.312958 | 1.04E-17 | 5.74E-17 |
| LEMD1 | 2.836861 | 1.87946 | 1.09E-17 | 5.98E-17 |
| NEK5 | -1.51743 | 2.069655 | 1.10E-17 | 6.02E-17 |
| PIP5KL1 | 1.5813 | 3.325657 | 1.13E-17 | 6.18E-17 |
| PRSS2 | 6.188217 | 5.173307 | 1.13E-17 | 6.20E-17 |
| IL13 | -1.71786 | -2.74883 | 1.14E-17 | 6.27E-17 |
| CHST15 | 1.040296 | 6.43319 | 1.16E-17 | 6.33E-17 |
| PRR7 | 1.465754 | 1.660557 | 1.17E-17 | 6.38E-17 |
| CCDC24 | 1.0567 | 3.902831 | 1.18E-17 | 6.45E-17 |
| SLC41A2 | 1.154679 | 5.334433 | 1.19E-17 | 6.53E-17 |
| PRF1 | -1.24812 | 4.375185 | 1.22E-17 | 6.67E-17 |
| NUDT17 | 1.011664 | 1.87974 | 1.22E-17 | 6.68E-17 |
| SIGLEC1 | -1.21586 | 5.352589 | 1.23E-17 | 6.72E-17 |
| NXPH1 | 5.108961 | -1.27009 | 1.30E-17 | 7.06E-17 |
| TUBB8 | 2.14589 | -1.05459 | 1.31E-17 | 7.13E-17 |
| OGDHL | 3.516363 | 1.886827 | 1.34E-17 | 7.29E-17 |
| TM4SF4 | 5.787037 | 5.448335 | 1.37E-17 | 7.43E-17 |
| GPSM2 | 1.098866 | 4.273263 | 1.37E-17 | 7.46E-17 |
| NUDT1 | 1.000533 | 3.967592 | 1.44E-17 | 7.82E-17 |
| MEIOC | 2.78977 | 0.662442 | 1.44E-17 | 7.84E-17 |
| PTPRN | 4.361492 | 2.403843 | 1.47E-17 | 7.96E-17 |
| DUSP26 | -1.45909 | -0.11379 | 1.48E-17 | 8.00E-17 |
| MCHR1 | 2.068765 | -0.03828 | 1.49E-17 | 8.06E-17 |
| H2AC16 | 5.297646 | -1.0833 | 1.53E-17 | 8.28E-17 |
| VPS37D | 1.528986 | 1.994944 | 1.54E-17 | 8.33E-17 |
| MXRA5 | 1.724281 | 7.163748 | 1.56E-17 | 8.42E-17 |
| HOXB7 | 2.104719 | 3.539819 | 1.63E-17 | 8.84E-17 |
| C11orf97 | -2.46634 | -0.53027 | 1.64E-17 | 8.89E-17 |
| SCN1A | -1.83724 | 2.159628 | 1.67E-17 | 9.05E-17 |
| GCKR | 3.057594 | 0.246514 | 1.69E-17 | 9.14E-17 |
| MYO7B | -1.66671 | 1.811172 | 1.74E-17 | 9.38E-17 |
| DPY19L1 | 1.15272 | 6.847535 | 1.75E-17 | 9.47E-17 |
| H4C3 | 6.094742 | 0.943614 | 1.76E-17 | 9.47E-17 |
| ZC3H12B | -1.06041 | 0.970647 | 1.77E-17 | 9.56E-17 |
| GCSAML | -1.60592 | 0.195893 | 1.78E-17 | 9.62E-17 |
| NOX5 | 3.072399 | 1.02569 | 1.82E-17 | 9.79E-17 |
| ASGR1 | -1.16183 | 2.168828 | 1.83E-17 | 9.85E-17 |
| OVGP1 | 1.571679 | 2.33593 | 1.84E-17 | 9.91E-17 |
| TBC1D26 | -2.31268 | -3.45919 | 1.87E-17 | 1.01E-16 |
| MCRIP2 | 1.135642 | 5.080875 | 1.88E-17 | 1.01E-16 |
| RUFY4 | 2.296844 | 0.853536 | 1.89E-17 | 1.02E-16 |
| DLX6 | 4.932547 | 0.110328 | 1.94E-17 | 1.04E-16 |
| TEX48 | 3.570817 | -2.24695 | 1.96E-17 | 1.05E-16 |
| F2 | 7.257399 | 1.075659 | 1.98E-17 | 1.06E-16 |
| SLC5A3 | 1.516491 | 6.092424 | 2.00E-17 | 1.08E-16 |
| NR5A2 | -1.13975 | 2.347907 | 2.03E-17 | 1.09E-16 |
| CFHR3 | 2.533657 | 0.530515 | 2.04E-17 | 1.09E-16 |
| EIF4EBP1 | 1.628956 | 5.567771 | 2.05E-17 | 1.10E-16 |
| CASP5 | -1.31055 | -0.51512 | 2.05E-17 | 1.10E-16 |
| CHRNA6 | 1.888545 | -1.66349 | 2.06E-17 | 1.10E-16 |
| PYGM | -1.17228 | 0.674006 | 2.11E-17 | 1.13E-16 |
| KRT15 | 2.664964 | 5.872574 | 2.12E-17 | 1.14E-16 |
| STAP2 | 1.000658 | 5.107712 | 2.13E-17 | 1.14E-16 |
| RPS17 | 1.048383 | 2.124464 | 2.14E-17 | 1.14E-16 |
| WFDC10B | 2.485618 | 0.345452 | 2.15E-17 | 1.15E-16 |
| SLC4A3 | 1.831346 | 3.086391 | 2.22E-17 | 1.19E-16 |
| RASGRP2 | -1.1401 | 3.188458 | 2.23E-17 | 1.19E-16 |
| KIF26A | -1.43199 | 2.56896 | 2.24E-17 | 1.20E-16 |
| DRC3 | -1.22926 | 2.817015 | 2.40E-17 | 1.28E-16 |
| NUP210L | 2.484378 | 1.319933 | 2.44E-17 | 1.30E-16 |
| ZGRF1 | 1.128515 | 2.462925 | 2.45E-17 | 1.30E-16 |
| WASF1 | 1.294845 | 3.207284 | 2.45E-17 | 1.30E-16 |
| PIWIL1 | 5.123291 | -0.91762 | 2.47E-17 | 1.32E-16 |
| CACNA1E | 2.710573 | -0.01469 | 2.55E-17 | 1.36E-16 |
| OAZ3 | 1.056266 | 1.060419 | 2.63E-17 | 1.40E-16 |
| HOXC9 | 3.28365 | 0.815629 | 2.66E-17 | 1.42E-16 |
| ENO3 | 2.619798 | 3.899874 | 2.67E-17 | 1.42E-16 |
| CNGA1 | 2.35268 | 1.143792 | 2.69E-17 | 1.43E-16 |
| SDHAF3 | 1.019951 | 4.111551 | 2.75E-17 | 1.46E-16 |
| XAGE1B | 4.180346 | -1.2503 | 2.77E-17 | 1.47E-16 |
| MYRF | -1.60046 | 5.755649 | 2.82E-17 | 1.49E-16 |
| CDX1 | 1.815324 | -1.14313 | 2.83E-17 | 1.50E-16 |
| AC109583.1 | 3.127392 | -2.09526 | 2.84E-17 | 1.50E-16 |
| MAP10 | 1.388771 | 2.421168 | 2.85E-17 | 1.51E-16 |
| PRTFDC1 | 1.293031 | 3.386295 | 2.87E-17 | 1.52E-16 |
| LCT | 4.013097 | 0.59971 | 2.98E-17 | 1.58E-16 |
| KCNE1B | -2.04293 | -1.57297 | 2.98E-17 | 1.58E-16 |
| DEFA4 | -2.5383 | -3.57466 | 3.04E-17 | 1.61E-16 |
| SPINK2 | 2.77159 | 0.350788 | 3.09E-17 | 1.63E-16 |
| TBC1D2 | -1.01694 | 6.040376 | 3.15E-17 | 1.66E-16 |
| OR14L1P | -1.7822 | -3.4124 | 3.15E-17 | 1.66E-16 |
| CCR8 | 1.652405 | 0.043644 | 3.15E-17 | 1.66E-16 |
| CHGB | 5.84979 | 5.497394 | 3.18E-17 | 1.68E-16 |
| KNSTRN | 1.08679 | 4.099865 | 3.20E-17 | 1.69E-16 |
| CENPW | 1.488159 | 2.945722 | 3.25E-17 | 1.71E-16 |
| ANKRD36C | 3.13338 | 3.625903 | 3.27E-17 | 1.72E-16 |
| KRT27 | -1.86018 | -1.75334 | 3.31E-17 | 1.74E-16 |
| HGFAC | 2.951193 | -0.42915 | 3.37E-17 | 1.78E-16 |
| NUPR1 | -1.09138 | 3.04496 | 3.37E-17 | 1.78E-16 |
| AC008687.4 | 1.970361 | -1.33187 | 3.48E-17 | 1.83E-16 |
| MFAP2 | 1.554585 | 4.34902 | 3.48E-17 | 1.83E-16 |
| BEND6 | 1.775129 | 1.518364 | 3.53E-17 | 1.86E-16 |
| TMEM88B | 2.857765 | -1.90295 | 3.54E-17 | 1.86E-16 |
| MCMDC2 | 1.300078 | 1.349632 | 3.76E-17 | 1.97E-16 |
| THEGL | 2.891146 | -2.33645 | 3.79E-17 | 1.99E-16 |
| SLC16A3 | 1.35575 | 7.268829 | 3.84E-17 | 2.01E-16 |
| SLC39A5 | 3.956505 | 0.929341 | 3.85E-17 | 2.02E-16 |
| ZNF93 | 1.242173 | 2.584376 | 3.91E-17 | 2.05E-16 |
| CFAP61 | -1.74671 | 1.038489 | 3.92E-17 | 2.05E-16 |
| SYNE1 | -1.10116 | 7.009362 | 3.96E-17 | 2.07E-16 |
| LCN6 | -2.09036 | -3.85891 | 4.11E-17 | 2.15E-16 |
| MZB1 | 2.136458 | 5.548448 | 4.18E-17 | 2.18E-16 |
| TM4SF5 | 8.328061 | 1.855997 | 4.22E-17 | 2.20E-16 |
| HMCN2 | -1.37883 | 2.365209 | 4.24E-17 | 2.21E-16 |
| PFN4 | 1.224471 | 0.482109 | 4.25E-17 | 2.22E-16 |
| POSTN | 1.658762 | 8.152135 | 4.28E-17 | 2.23E-16 |
| CD300E | -1.3623 | 2.494598 | 4.42E-17 | 2.30E-16 |
| RFLNA | 2.586118 | 2.811318 | 4.46E-17 | 2.32E-16 |
| IL34 | -1.24327 | 2.471752 | 4.50E-17 | 2.35E-16 |
| GLDC | 2.881269 | 2.711265 | 4.56E-17 | 2.37E-16 |
| LHX5 | 5.159388 | -0.89858 | 4.93E-17 | 2.56E-16 |
| ANGPTL3 | 4.115965 | -0.9232 | 5.01E-17 | 2.60E-16 |
| CCDC152 | -1.02859 | 0.308731 | 5.04E-17 | 2.62E-16 |
| KRT18 | 1.233273 | 9.357045 | 5.05E-17 | 2.62E-16 |
| KRTCAP2 | 1.312289 | 2.410794 | 5.25E-17 | 2.73E-16 |
| TRIM72 | 4.337606 | 1.291852 | 5.27E-17 | 2.73E-16 |
| ARL14 | 5.081106 | 1.990259 | 5.27E-17 | 2.73E-16 |
| MIXL1 | 2.014678 | 0.101875 | 5.45E-17 | 2.82E-16 |
| GJA1 | -1.20418 | 7.151618 | 5.46E-17 | 2.83E-16 |
| SALL1 | 5.811975 | 1.151576 | 5.47E-17 | 2.83E-16 |
| CALCA | 8.581473 | 7.933721 | 5.48E-17 | 2.84E-16 |
| LOXL2 | 1.766724 | 5.806868 | 5.60E-17 | 2.90E-16 |
| LHB | 2.075986 | -1.80372 | 5.60E-17 | 2.90E-16 |
| C19orf38 | -1.04546 | 1.795887 | 5.60E-17 | 2.90E-16 |
| SMIM10L2B | -1.02244 | 1.132206 | 5.76E-17 | 2.98E-16 |
| PPM1J | 1.453118 | 0.287799 | 5.81E-17 | 3.00E-16 |
| EFCAB1 | -2.05091 | 2.695552 | 5.83E-17 | 3.01E-16 |
| ACHE | 2.493775 | 4.246491 | 5.95E-17 | 3.07E-16 |
| H2BC14 | 6.421332 | -1.50183 | 5.96E-17 | 3.07E-16 |
| SPINK13 | 3.864823 | 0.750705 | 6.15E-17 | 3.17E-16 |
| MUC6 | 6.430747 | 6.272464 | 6.17E-17 | 3.18E-16 |
| CIBAR2 | -1.95713 | 2.346285 | 6.18E-17 | 3.18E-16 |
| SPRR1B | 6.072463 | 3.143333 | 6.31E-17 | 3.25E-16 |
| APOL4 | -1.09766 | 4.3098 | 6.33E-17 | 3.25E-16 |
| H2BC12 | 1.360461 | 4.981888 | 6.42E-17 | 3.30E-16 |
| OR2W3 | -2.2149 | -2.52963 | 6.43E-17 | 3.31E-16 |
| CATSPERB | 2.275585 | 2.369788 | 6.57E-17 | 3.37E-16 |
| MYBPC1 | 5.897671 | 2.68764 | 6.59E-17 | 3.38E-16 |
| C4orf54 | 3.818107 | 0.361973 | 6.59E-17 | 3.38E-16 |
| HDAC10 | 1.239816 | 0.11144 | 6.60E-17 | 3.39E-16 |
| OR10H1 | 4.061946 | -2.03556 | 6.88E-17 | 3.53E-16 |
| CHML | 1.366381 | 5.547792 | 7.22E-17 | 3.70E-16 |
| CFAP20DC | 1.489683 | 1.906646 | 7.23E-17 | 3.70E-16 |
| TNNT1 | 3.241164 | 4.558822 | 7.27E-17 | 3.72E-16 |
| FOXA1 | 1.429525 | 6.44017 | 7.50E-17 | 3.84E-16 |
| SERPINB5 | 4.412321 | 4.088569 | 7.55E-17 | 3.86E-16 |
| NME2 | 1.318353 | 0.343087 | 7.60E-17 | 3.88E-16 |
| OGFOD2 | 1.152085 | -0.58302 | 7.64E-17 | 3.90E-16 |
| DTHD1 | -1.78353 | 2.610408 | 7.67E-17 | 3.91E-16 |
| GCM1 | 2.834379 | -1.18347 | 7.81E-17 | 3.99E-16 |
| OTP | -2.38378 | -2.98849 | 7.88E-17 | 4.02E-16 |
| SMOX | 1.522507 | 3.97719 | 7.90E-17 | 4.03E-16 |
| IGLON5 | 2.360558 | -0.3587 | 8.13E-17 | 4.15E-16 |
| CKM | 3.012781 | 0.716037 | 8.16E-17 | 4.16E-16 |
| TFPI2 | 3.890107 | 7.487443 | 8.21E-17 | 4.18E-16 |
| LRRC14B | 3.374633 | -2.24406 | 8.47E-17 | 4.31E-16 |
| LHX1 | 6.700048 | -0.28737 | 8.54E-17 | 4.35E-16 |
| PPIL6 | -1.29835 | 2.833477 | 8.67E-17 | 4.41E-16 |
| ITPRID1 | 4.576103 | 2.151698 | 8.75E-17 | 4.45E-16 |
| GLB1L2 | 1.504084 | 5.415066 | 8.76E-17 | 4.45E-16 |
| C4orf48 | 1.638796 | 2.076861 | 9.12E-17 | 4.63E-16 |
| DNAH10 | -1.62568 | 2.46535 | 9.25E-17 | 4.70E-16 |
| CSTL1 | 4.556541 | -2.17733 | 9.42E-17 | 4.78E-16 |
| TFF2 | 11.69339 | 5.730409 | 9.43E-17 | 4.79E-16 |
| ADH1A | -1.98457 | -2.08302 | 9.48E-17 | 4.81E-16 |
| CELF3 | 4.306245 | 1.900752 | 9.48E-17 | 4.81E-16 |
| MTNR1A | 3.646446 | -2.08036 | 9.67E-17 | 4.90E-16 |
| H2AW | 2.534244 | 3.34871 | 9.95E-17 | 5.04E-16 |
| MEGF10 | 2.790598 | 0.491769 | 1.00E-16 | 5.07E-16 |
| LCN2 | 2.715991 | 7.721708 | 1.01E-16 | 5.12E-16 |
| RGS13 | -1.43937 | 0.812786 | 1.01E-16 | 5.13E-16 |
| CHKB-CPT1B | 2.091344 | -2.34593 | 1.03E-16 | 5.20E-16 |
| PADI3 | 6.993163 | 2.43142 | 1.03E-16 | 5.22E-16 |
| GPX8 | 1.230142 | 5.012996 | 1.04E-16 | 5.26E-16 |
| CNR1 | -1.49634 | 2.905001 | 1.05E-16 | 5.32E-16 |
| GPR87 | 3.765839 | -1.98176 | 1.08E-16 | 5.46E-16 |
| AVPR1B | 3.515572 | -1.36672 | 1.12E-16 | 5.67E-16 |
| BRSK1 | 1.565849 | 2.18977 | 1.14E-16 | 5.73E-16 |
| CCNI2 | 1.727927 | 0.570287 | 1.14E-16 | 5.76E-16 |
| TPD52 | 1.138713 | 6.798069 | 1.15E-16 | 5.82E-16 |
| TMEM132C | -2.12985 | -0.24729 | 1.16E-16 | 5.84E-16 |
| GABRA3 | 5.979278 | 1.450067 | 1.17E-16 | 5.89E-16 |
| GNG7 | -1.02065 | 3.350441 | 1.17E-16 | 5.90E-16 |
| RSKR | 1.246973 | 2.341463 | 1.21E-16 | 6.07E-16 |
| CCL25 | 2.899702 | -1.64408 | 1.21E-16 | 6.09E-16 |
| FGD6 | 1.000874 | 5.976368 | 1.23E-16 | 6.16E-16 |
| CMA1 | -1.729 | -1.68287 | 1.24E-16 | 6.21E-16 |
| STEAP2 | 1.687164 | 5.428442 | 1.24E-16 | 6.23E-16 |
| TWIST1 | 2.487839 | 1.593405 | 1.25E-16 | 6.25E-16 |
| GRIK2 | 2.637885 | 1.296014 | 1.25E-16 | 6.27E-16 |
| HEY2 | -1.08108 | 1.471509 | 1.26E-16 | 6.30E-16 |
| KRT6A | 5.488834 | 6.690896 | 1.27E-16 | 6.35E-16 |
| COL9A2 | 1.989766 | 4.972091 | 1.27E-16 | 6.36E-16 |
| FSIP2 | 2.995881 | 1.903644 | 1.29E-16 | 6.44E-16 |
| FAM81A | 1.417205 | 2.253303 | 1.29E-16 | 6.46E-16 |
| CALML6 | 2.410587 | -1.23718 | 1.30E-16 | 6.49E-16 |
| CTSV | 2.288002 | 3.277771 | 1.30E-16 | 6.49E-16 |
| SLC22A4 | -1.17867 | 1.900966 | 1.35E-16 | 6.73E-16 |
| PRSS1 | 6.103045 | 2.211044 | 1.37E-16 | 6.83E-16 |
| DNASE1L2 | 1.757721 | -0.58684 | 1.39E-16 | 6.94E-16 |
| H2BC13 | 3.929138 | -0.67747 | 1.41E-16 | 7.02E-16 |
| HNF1A | 3.849957 | 1.128461 | 1.41E-16 | 7.04E-16 |
| LHFPL3 | -2.03036 | 0.579412 | 1.45E-16 | 7.23E-16 |
| SH3GL2 | -2.21539 | 0.313504 | 1.47E-16 | 7.34E-16 |
| HOMER3 | 1.050144 | 3.432796 | 1.52E-16 | 7.58E-16 |
| CILP | 2.479599 | 4.471333 | 1.54E-16 | 7.66E-16 |
| MKRN2OS | 1.542488 | 1.226428 | 1.56E-16 | 7.76E-16 |
| WDR97 | 2.086937 | 1.515405 | 1.58E-16 | 7.87E-16 |
| ENTPD2 | 2.180133 | 2.178545 | 1.58E-16 | 7.88E-16 |
| AGT | 3.107342 | 4.942089 | 1.61E-16 | 8.02E-16 |
| TTC25 | -1.33916 | 2.499379 | 1.62E-16 | 8.05E-16 |
| CHRNA9 | 5.13058 | 2.249997 | 1.63E-16 | 8.12E-16 |
| SLC26A1 | 1.086096 | 2.22362 | 1.64E-16 | 8.12E-16 |
| PMAIP1 | 1.680558 | 4.521986 | 1.67E-16 | 8.28E-16 |
| KCNJ10 | 2.119753 | 0.895571 | 1.68E-16 | 8.33E-16 |
| SYT16 | 3.008402 | 1.012507 | 1.68E-16 | 8.34E-16 |
| SCAMP5 | 1.234141 | 4.197971 | 1.69E-16 | 8.39E-16 |
| ACTL8 | 7.811074 | 0.338699 | 1.74E-16 | 8.60E-16 |
| GET4 | 1.318257 | -0.18097 | 1.75E-16 | 8.66E-16 |
| THSD4 | -1.04613 | 4.820188 | 1.77E-16 | 8.78E-16 |
| NT5E | 1.952262 | 6.356415 | 1.81E-16 | 8.95E-16 |
| TMEM106C | 1.05764 | 6.429453 | 1.82E-16 | 8.97E-16 |
| RAB25 | 1.091032 | 7.140156 | 1.83E-16 | 9.06E-16 |
| HAL | 2.675545 | 3.543708 | 1.83E-16 | 9.06E-16 |
| L1TD1 | -1.56352 | 0.042411 | 1.86E-16 | 9.20E-16 |
| PDCD6 | 1.243643 | 3.443254 | 1.89E-16 | 9.31E-16 |
| MAG | -2.05478 | -1.49096 | 1.90E-16 | 9.36E-16 |
| PRRX2 | 2.212339 | 2.559087 | 1.91E-16 | 9.43E-16 |
| EPB41L3 | -1.04985 | 5.153955 | 1.92E-16 | 9.49E-16 |
| TEX45 | 2.337234 | -0.62945 | 1.93E-16 | 9.50E-16 |
| ROBO2 | -1.54252 | 3.399307 | 1.93E-16 | 9.52E-16 |
| AK1 | -1.09125 | 3.757666 | 1.94E-16 | 9.58E-16 |
| WNK2 | 2.07839 | 3.889189 | 1.98E-16 | 9.76E-16 |
| TOGARAM2 | -1.55987 | 2.374442 | 1.99E-16 | 9.77E-16 |
| NPTX1 | 3.923779 | 5.352245 | 2.00E-16 | 9.83E-16 |
| TRIB3 | 1.319666 | 5.285116 | 2.10E-16 | 1.03E-15 |
| TRIM9 | 2.802761 | 1.812489 | 2.12E-16 | 1.04E-15 |
| SLC16A6 | -1.19952 | 2.403374 | 2.12E-16 | 1.04E-15 |
| SAXO2 | -1.69021 | 2.39282 | 2.17E-16 | 1.07E-15 |
| CR589904.2 | 5.267594 | -0.95098 | 2.20E-16 | 1.08E-15 |
| MORN5 | -2.17703 | 1.017716 | 2.22E-16 | 1.09E-15 |
| TRIM47 | 1.047457 | 5.546442 | 2.22E-16 | 1.09E-15 |
| CSMD2 | 1.807164 | 1.815345 | 2.26E-16 | 1.10E-15 |
| DNAI3 | -1.64789 | 1.319095 | 2.34E-16 | 1.14E-15 |
| NKD2 | -1.13578 | 3.729804 | 2.36E-16 | 1.16E-15 |
| CIT | 2.067242 | 7.168741 | 2.43E-16 | 1.19E-15 |
| GFY | 5.861031 | -0.78 | 2.44E-16 | 1.19E-15 |
| CST5 | -1.8972 | -0.60077 | 2.44E-16 | 1.19E-15 |
| CCDC154 | 2.588446 | 1.366269 | 2.48E-16 | 1.21E-15 |
| KCNK5 | 1.51402 | 6.093878 | 2.57E-16 | 1.25E-15 |
| CEMIP | 2.147653 | 6.199235 | 2.59E-16 | 1.26E-15 |
| PHF24 | -1.12458 | -1.0538 | 2.60E-16 | 1.27E-15 |
| TEKT1 | -2.22877 | 2.875673 | 2.63E-16 | 1.28E-15 |
| VWA3B | -1.8113 | 2.698679 | 2.66E-16 | 1.29E-15 |
| CERS6 | 1.007295 | 4.974919 | 2.69E-16 | 1.31E-15 |
| ERVV-1 | 4.456575 | -1.59925 | 2.84E-16 | 1.38E-15 |
| ALPK2 | 2.233306 | 0.677647 | 2.86E-16 | 1.39E-15 |
| SEC14L4 | -1.50157 | 2.227291 | 2.87E-16 | 1.39E-15 |
| EFCAB12 | -1.52451 | 1.616651 | 2.88E-16 | 1.40E-15 |
| UGT8 | 2.198219 | 3.983169 | 2.89E-16 | 1.40E-15 |
| ERBB4 | -1.70497 | 2.402248 | 2.89E-16 | 1.40E-15 |
| C1orf105 | 3.187545 | -2.42738 | 2.94E-16 | 1.42E-15 |
| NOXA1 | 1.42987 | 3.932741 | 3.00E-16 | 1.45E-15 |
| FOXE1 | 4.417117 | 1.92868 | 3.03E-16 | 1.46E-15 |
| GDNF | 2.957894 | -0.41873 | 3.07E-16 | 1.48E-15 |
| HS3ST1 | 1.546127 | 4.71417 | 3.08E-16 | 1.49E-15 |
| CRYBA2 | 5.190951 | -1.22146 | 3.21E-16 | 1.55E-15 |
| MSH5-SAPCD1 | 1.780841 | -1.28862 | 3.22E-16 | 1.55E-15 |
| FGF5 | 5.814715 | -0.18055 | 3.24E-16 | 1.56E-15 |
| TF | 4.732217 | 5.436311 | 3.27E-16 | 1.58E-15 |
| SLC9A3 | 2.09688 | 0.582799 | 3.29E-16 | 1.58E-15 |
| GPT | 2.099427 | 1.549801 | 3.34E-16 | 1.61E-15 |
| BASP1 | 1.800858 | 6.588891 | 3.35E-16 | 1.61E-15 |
| ETV1 | -1.13758 | 5.70198 | 3.36E-16 | 1.62E-15 |
| FAM171A2 | 1.987945 | 2.5863 | 3.40E-16 | 1.63E-15 |
| MAMDC4 | 1.589124 | 3.214346 | 3.41E-16 | 1.64E-15 |
| C20orf204 | 1.842411 | 1.02255 | 3.43E-16 | 1.65E-15 |
| MMP9 | 2.025005 | 5.996274 | 3.53E-16 | 1.70E-15 |
| CENPN | 1.073539 | 2.879135 | 3.62E-16 | 1.74E-15 |
| KIRREL2 | 3.601532 | 0.332235 | 3.66E-16 | 1.76E-15 |
| ATOH8 | -1.59281 | 5.573501 | 3.71E-16 | 1.78E-15 |
| TET1 | 1.601882 | 1.94995 | 3.77E-16 | 1.81E-15 |
| CSAG1 | 7.18882 | 1.968937 | 3.79E-16 | 1.82E-15 |
| AL031777.2 | 2.718522 | -1.79419 | 3.81E-16 | 1.82E-15 |
| CACNG5 | 4.004098 | -1.5101 | 3.84E-16 | 1.84E-15 |
| MTFP1 | 1.201138 | -0.72472 | 3.98E-16 | 1.91E-15 |
| NFKBIZ | -1.0553 | 6.083397 | 4.01E-16 | 1.92E-15 |
| MRPL38 | 1.053298 | 0.89187 | 4.07E-16 | 1.95E-15 |
| HTR1D | 2.711957 | 1.771631 | 4.12E-16 | 1.97E-15 |
| ADGRB1 | 3.209979 | 3.651612 | 4.18E-16 | 1.99E-15 |
| CFB | 1.617182 | 2.412901 | 4.24E-16 | 2.02E-15 |
| TLX1 | 5.476206 | -2.00217 | 4.34E-16 | 2.07E-15 |
| LRP8 | 1.346826 | 4.037191 | 4.39E-16 | 2.09E-15 |
| ST6GALNAC1 | 1.988848 | 6.180098 | 4.68E-16 | 2.23E-15 |
| AKR1C2 | 4.636913 | 8.480419 | 4.78E-16 | 2.27E-15 |
| PKIB | 2.048812 | 4.049577 | 4.81E-16 | 2.29E-15 |
| FOXD3 | 3.643918 | -1.81715 | 4.81E-16 | 2.29E-15 |
| MYH6 | 4.175842 | -2.59857 | 4.91E-16 | 2.33E-15 |
| H2BC11 | 2.316554 | 1.580887 | 4.94E-16 | 2.34E-15 |
| IGSF1 | 2.977482 | 1.077261 | 4.95E-16 | 2.35E-15 |
| LRRC15 | 2.345115 | 4.935855 | 4.98E-16 | 2.36E-15 |
| ROPN1L | -1.80666 | 1.86879 | 5.00E-16 | 2.37E-15 |
| H2AC20 | 2.978634 | 1.069525 | 5.03E-16 | 2.38E-15 |
| GCGR | 3.514364 | -1.82356 | 5.06E-16 | 2.40E-15 |
| ZNF215 | 1.559261 | 1.208624 | 5.07E-16 | 2.40E-15 |
| MUC4 | 2.484385 | 7.202893 | 5.07E-16 | 2.40E-15 |
| TRIM17 | 2.195889 | 2.279902 | 5.10E-16 | 2.41E-15 |
| ANKRD34C | -2.25093 | -3.50064 | 5.14E-16 | 2.43E-15 |
| LKAAEAR1 | -1.80159 | -2.32277 | 5.14E-16 | 2.43E-15 |
| ACMSD | 3.020138 | 0.648294 | 5.22E-16 | 2.47E-15 |
| SLC6A3 | 4.016081 | 3.311529 | 5.23E-16 | 2.48E-15 |
| HPGDS | -1.32941 | 2.065179 | 5.54E-16 | 2.61E-15 |
| CFAP65 | -1.89854 | 2.328744 | 5.56E-16 | 2.62E-15 |
| NXF3 | -1.90019 | 0.955247 | 5.68E-16 | 2.68E-15 |
| CNTNAP3B | -1.61248 | -0.72504 | 5.73E-16 | 2.70E-15 |
| RPL3L | 1.898851 | -1.54724 | 5.74E-16 | 2.71E-15 |
| PLSCR2 | 1.851583 | -1.23161 | 5.85E-16 | 2.76E-15 |
| ERVH48-1 | 4.671314 | 2.412799 | 6.00E-16 | 2.83E-15 |
| C1orf189 | -1.88115 | -0.01963 | 6.21E-16 | 2.92E-15 |
| SULT4A1 | 3.890945 | 0.394324 | 6.31E-16 | 2.97E-15 |
| NMNAT2 | 2.754042 | 4.337472 | 6.38E-16 | 3.00E-15 |
| TFAP2C | 1.246024 | 4.487478 | 6.38E-16 | 3.00E-15 |
| ANKRD13B | 1.305106 | 2.948029 | 6.48E-16 | 3.05E-15 |
| HID1 | 1.075811 | 6.525254 | 6.73E-16 | 3.16E-15 |
| H1-2 | 1.662078 | 5.91614 | 6.88E-16 | 3.23E-15 |
| MUC5B | 3.987205 | 9.532609 | 7.01E-16 | 3.29E-15 |
| ELAVL2 | 3.498237 | 0.196387 | 7.17E-16 | 3.36E-15 |
| MAGEC1 | 7.970238 | 1.383022 | 7.34E-16 | 3.44E-15 |
| KLHDC8A | 2.141483 | 1.330813 | 7.36E-16 | 3.45E-15 |
| PNPLA5 | 5.855428 | -1.45527 | 7.38E-16 | 3.46E-15 |
| ZIC5 | 5.395707 | -0.60163 | 7.52E-16 | 3.52E-15 |
| RSPH4A | -1.75061 | 2.644177 | 7.59E-16 | 3.55E-15 |
| C6 | -1.99463 | 2.500803 | 7.76E-16 | 3.63E-15 |
| SATB2 | 1.312063 | 2.816189 | 7.87E-16 | 3.68E-15 |
| CDK5R2 | 4.353597 | 0.633914 | 8.19E-16 | 3.83E-15 |
| ATG9B | 1.90709 | 2.594204 | 8.24E-16 | 3.85E-15 |
| WFDC2 | 1.782215 | 8.628396 | 8.45E-16 | 3.94E-15 |
| KCNK12 | 2.223522 | 0.495592 | 8.63E-16 | 4.02E-15 |
| LRRC71 | -2.02705 | 1.006827 | 8.90E-16 | 4.14E-15 |
| KCNJ8 | -1.17233 | 3.839358 | 9.29E-16 | 4.32E-15 |
| CATIP | -1.58218 | 0.232738 | 9.44E-16 | 4.39E-15 |
| SLC23A3 | 1.641364 | -0.53701 | 9.59E-16 | 4.45E-15 |
| RIMS2 | 3.859047 | 1.464635 | 9.59E-16 | 4.45E-15 |
| DLX5 | 2.672578 | 0.617011 | 9.65E-16 | 4.48E-15 |
| CAPN11 | -1.13135 | -1.108 | 9.74E-16 | 4.52E-15 |
| TEX55 | 3.872704 | -2.29473 | 9.95E-16 | 4.61E-15 |
| SLC16A11 | -1.43876 | 1.874956 | 1.00E-15 | 4.65E-15 |
| TCTEX1D4 | -1.32653 | 0.131741 | 1.01E-15 | 4.67E-15 |
| ZNF681 | 1.148113 | 2.903889 | 1.08E-15 | 4.98E-15 |
| SCN4A | 3.328785 | 1.402794 | 1.09E-15 | 5.03E-15 |
| DRC1 | -1.90979 | 2.353205 | 1.09E-15 | 5.05E-15 |
| CALB1 | 5.770625 | 3.757811 | 1.10E-15 | 5.08E-15 |
| KCNQ2 | 5.348334 | 0.928181 | 1.11E-15 | 5.14E-15 |
| LIME1 | 1.500386 | 0.725244 | 1.14E-15 | 5.27E-15 |
| MATK | -1.09266 | 2.594099 | 1.15E-15 | 5.30E-15 |
| SLCO1B1 | 6.478731 | -0.89993 | 1.19E-15 | 5.49E-15 |
| EYS | 2.009788 | 0.675173 | 1.20E-15 | 5.54E-15 |
| ALOX15 | -2.10289 | 3.530537 | 1.22E-15 | 5.63E-15 |
| ACSM2A | -2.05149 | -3.67853 | 1.26E-15 | 5.78E-15 |
| MYADML2 | 2.399102 | -2.70182 | 1.28E-15 | 5.88E-15 |
| DNAAF6 | -2.20185 | 0.076047 | 1.31E-15 | 6.02E-15 |
| PXMP4 | -1.03153 | 5.625009 | 1.36E-15 | 6.25E-15 |
| AK7 | -1.31356 | 2.775161 | 1.36E-15 | 6.26E-15 |
| TRPM1 | -1.95653 | -3.10308 | 1.41E-15 | 6.48E-15 |
| ADAMDEC1 | 2.294362 | 3.731506 | 1.42E-15 | 6.51E-15 |
| CALCB | 4.499676 | 0.401179 | 1.45E-15 | 6.66E-15 |
| NOX1 | 1.517637 | 1.195829 | 1.50E-15 | 6.88E-15 |
| GUCY2C | 3.136174 | 0.871289 | 1.51E-15 | 6.91E-15 |
| INSL4 | 8.109108 | 2.366062 | 1.53E-15 | 7.02E-15 |
| FAM184A | -1.23166 | 3.823485 | 1.54E-15 | 7.06E-15 |
| CYP2D6 | 2.052919 | 1.362331 | 1.56E-15 | 7.14E-15 |
| MYBPH | 3.716056 | 2.217219 | 1.56E-15 | 7.14E-15 |
| PRDM13 | 5.325142 | -2.07117 | 1.58E-15 | 7.21E-15 |
| ENPP6 | -1.32173 | -0.80295 | 1.59E-15 | 7.25E-15 |
| CCNL2 | 1.053627 | 7.071183 | 1.61E-15 | 7.37E-15 |
| ATP1B1 | 1.311832 | 9.269356 | 1.68E-15 | 7.68E-15 |
| ITGB4 | 1.708929 | 7.97763 | 1.74E-15 | 7.93E-15 |
| STEAP1B | 2.401665 | 0.995633 | 1.78E-15 | 8.10E-15 |
| PPEF1 | 2.206063 | 0.673667 | 1.84E-15 | 8.39E-15 |
| ST8SIA2 | 3.35292 | -0.50256 | 1.85E-15 | 8.41E-15 |
| KCP | 2.101135 | 2.550287 | 1.88E-15 | 8.54E-15 |
| SLC28A2 | 4.50407 | 2.366289 | 1.89E-15 | 8.62E-15 |
| KCNE4 | 2.315144 | 4.620467 | 1.90E-15 | 8.63E-15 |
| NTRK2 | -1.83977 | 3.551538 | 1.95E-15 | 8.85E-15 |
| KCNG2 | 2.019692 | -0.51331 | 1.98E-15 | 8.98E-15 |
| ALDOA | 1.164835 | 3.298879 | 1.99E-15 | 9.03E-15 |
| HCAR1 | 2.506177 | 3.429657 | 2.01E-15 | 9.12E-15 |
| EPHB3 | 1.358439 | 5.082458 | 2.02E-15 | 9.15E-15 |
| KHDRBS2 | -1.67958 | 1.555634 | 2.02E-15 | 9.18E-15 |
| RASGEF1C | 3.762904 | -0.45574 | 2.14E-15 | 9.69E-15 |
| FTCD | 2.972621 | -0.28042 | 2.15E-15 | 9.73E-15 |
| H4C4 | 5.428919 | 0.32737 | 2.16E-15 | 9.79E-15 |
| CGA | 8.919029 | 3.808323 | 2.17E-15 | 9.84E-15 |
| DRAM1 | -1.07318 | 7.332411 | 2.22E-15 | 1.00E-14 |
| AL157935.2 | -1.13434 | -1.76359 | 2.25E-15 | 1.02E-14 |
| HOXD12 | 5.247252 | -2.7367 | 2.26E-15 | 1.02E-14 |
| MMP14 | 1.199963 | 8.456039 | 2.29E-15 | 1.04E-14 |
| GOT1 | 1.014035 | 5.972527 | 2.30E-15 | 1.04E-14 |
| PNMA5 | 5.535311 | 1.781533 | 2.30E-15 | 1.04E-14 |
| CLDN14 | 2.208356 | -0.8923 | 2.32E-15 | 1.05E-14 |
| RPL22L1 | 1.198188 | 4.987672 | 2.39E-15 | 1.08E-14 |
| ADGRB3 | -1.57054 | 0.627069 | 2.39E-15 | 1.08E-14 |
| PAQR6 | 1.705175 | 1.898237 | 2.43E-15 | 1.10E-14 |
| SLC28A1 | 2.291915 | -1.80922 | 2.44E-15 | 1.10E-14 |
| C6orf141 | 1.994801 | 2.418199 | 2.49E-15 | 1.12E-14 |
| TRPM2 | 1.231305 | 4.068323 | 2.52E-15 | 1.13E-14 |
| CDX2 | 5.032731 | 0.291177 | 2.62E-15 | 1.18E-14 |
| AC068946.1 | 1.731883 | -1.45357 | 2.71E-15 | 1.22E-14 |
| NTNG1 | -1.84746 | 1.846704 | 2.71E-15 | 1.22E-14 |
| PGGHG | 1.965565 | 7.309726 | 2.74E-15 | 1.23E-14 |
| GPR162 | -1.14717 | 2.552865 | 2.82E-15 | 1.26E-14 |
| CLEC6A | -1.62521 | -0.75352 | 2.83E-15 | 1.27E-14 |
| WIF1 | -2.25306 | 5.807787 | 2.84E-15 | 1.27E-14 |
| DIABLO | 1.119016 | 0.661857 | 2.84E-15 | 1.27E-14 |
| PLK5 | 3.442954 | -2.05722 | 2.85E-15 | 1.28E-14 |
| LDLRAD2 | -1.0446 | 0.298036 | 2.89E-15 | 1.29E-14 |
| H2AC12 | 6.055569 | -0.31547 | 2.94E-15 | 1.31E-14 |
| GTSF1L | 2.544905 | -3.24399 | 3.03E-15 | 1.35E-14 |
| SYCE3 | 1.903068 | -0.51046 | 3.06E-15 | 1.37E-14 |
| PRSS53 | 1.487723 | -0.17832 | 3.17E-15 | 1.41E-14 |
| RGS16 | -1.02372 | 5.332565 | 3.22E-15 | 1.43E-14 |
| TEX22 | 1.424788 | -0.66535 | 3.24E-15 | 1.44E-14 |
| MAPK8IP3 | 1.168775 | 6.107228 | 3.24E-15 | 1.44E-14 |
| PPP1R42 | -1.89903 | -0.69572 | 3.37E-15 | 1.50E-14 |
| ADGRB2 | 1.555314 | 2.911393 | 3.45E-15 | 1.53E-14 |
| KLF15 | -1.37891 | 3.392906 | 3.45E-15 | 1.53E-14 |
| TFRC | -1.00033 | 7.612283 | 3.46E-15 | 1.54E-14 |
| CDH15 | 2.176563 | 2.343944 | 3.49E-15 | 1.55E-14 |
| UBE2QL1 | 2.463526 | 1.079433 | 3.51E-15 | 1.56E-14 |
| TMEM92 | 1.329059 | 4.494855 | 3.51E-15 | 1.56E-14 |
| ADAM32 | 1.743376 | 0.181831 | 3.55E-15 | 1.57E-14 |
| EPB42 | -2.53145 | -3.48149 | 3.57E-15 | 1.58E-14 |
| SP5 | 2.359381 | 2.59363 | 3.62E-15 | 1.60E-14 |
| HOXA13 | 6.411404 | -0.15518 | 3.70E-15 | 1.64E-14 |
| COL1A2 | 1.517055 | 10.9943 | 3.76E-15 | 1.66E-14 |
| DNAJC5B | -1.18098 | 1.835934 | 3.77E-15 | 1.67E-14 |
| COL9A3 | 2.319365 | 1.761873 | 3.77E-15 | 1.67E-14 |
| HAPLN3 | 1.19141 | 4.31337 | 3.77E-15 | 1.67E-14 |
| LY6K | 3.556171 | 2.419346 | 3.81E-15 | 1.68E-14 |
| CCSER1 | 1.59828 | 2.401462 | 4.00E-15 | 1.77E-14 |
| TCTE3 | 1.06547 | 1.093321 | 4.02E-15 | 1.77E-14 |
| COL25A1 | 4.294489 | 3.544493 | 4.03E-15 | 1.78E-14 |
| UGT2B11 | 7.168731 | -0.01547 | 4.11E-15 | 1.81E-14 |
| IGLL1 | 2.9785 | -1.46979 | 4.15E-15 | 1.83E-14 |
| PIDD1 | 1.003594 | 4.226937 | 4.39E-15 | 1.93E-14 |
| KLHDC7B | 1.961606 | 3.122171 | 4.40E-15 | 1.94E-14 |
| SLC44A5 | 2.510096 | 3.826196 | 4.64E-15 | 2.04E-14 |
| TNFSF4 | 1.268163 | 2.416508 | 4.75E-15 | 2.09E-14 |
| FCRL4 | 2.508691 | -0.79093 | 4.77E-15 | 2.09E-14 |
| CREG2 | 2.810449 | 0.885789 | 4.80E-15 | 2.11E-14 |
| SIRPG | 1.468794 | 2.028113 | 4.96E-15 | 2.17E-14 |
| PRELID3A | 1.001173 | 1.496216 | 5.05E-15 | 2.21E-14 |
| WDR90 | 1.018691 | 5.024049 | 5.22E-15 | 2.29E-14 |
| AFP | 8.508652 | 2.536221 | 5.23E-15 | 2.29E-14 |
| LRIG3 | 1.462437 | 6.148568 | 5.24E-15 | 2.29E-14 |
| TRPV3 | 1.884137 | 0.940695 | 5.33E-15 | 2.33E-14 |
| PNMA3 | 2.686245 | 1.344782 | 5.36E-15 | 2.35E-14 |
| HKDC1 | 1.732161 | 4.496859 | 5.39E-15 | 2.36E-14 |
| JAKMIP3 | 2.356 | 1.404838 | 5.40E-15 | 2.36E-14 |
| INA | 4.160866 | 1.900152 | 5.43E-15 | 2.37E-14 |
| COL4A4 | -1.16036 | 5.286555 | 5.52E-15 | 2.41E-14 |
| MAGEA3 | 8.134824 | 3.287254 | 5.52E-15 | 2.41E-14 |
| BHMT2 | 2.926199 | 4.435688 | 5.53E-15 | 2.42E-14 |
| GDPD4 | 2.143795 | -1.98065 | 5.64E-15 | 2.46E-14 |
| TSPAN5 | 1.140669 | 5.1653 | 5.65E-15 | 2.47E-14 |
| H2AC4 | 5.91846 | -1.0526 | 5.72E-15 | 2.49E-14 |
| SRGN | -1.0381 | 7.585317 | 5.76E-15 | 2.51E-14 |
| SYNPR | 4.643052 | -1.91812 | 5.77E-15 | 2.52E-14 |
| MAP3K15 | -1.59365 | -0.09223 | 5.83E-15 | 2.54E-14 |
| CHAC2 | 1.055947 | 2.127835 | 5.84E-15 | 2.55E-14 |
| BRCA2 | 1.129766 | 3.304249 | 5.91E-15 | 2.57E-14 |
| CYP2F1 | -2.17527 | 0.883899 | 6.09E-15 | 2.65E-14 |
| OLFM4 | 6.408117 | 3.977854 | 6.26E-15 | 2.72E-14 |
| WDR38 | -2.03215 | 2.115004 | 6.39E-15 | 2.78E-14 |
| GRB7 | 1.200956 | 5.746208 | 6.44E-15 | 2.80E-14 |
| DNAI4 | -1.25124 | 2.812565 | 6.48E-15 | 2.81E-14 |
| GRM4 | 3.36183 | 0.511082 | 6.53E-15 | 2.83E-14 |
| KCNK1 | 1.406416 | 5.490004 | 6.61E-15 | 2.86E-14 |
| KLHL32 | -1.26388 | 0.77607 | 6.64E-15 | 2.88E-14 |
| SLC7A9 | 2.921045 | 0.248972 | 6.68E-15 | 2.89E-14 |
| POU6F2 | 3.970494 | 2.294062 | 6.76E-15 | 2.93E-14 |
| THY1 | 1.31415 | 6.084012 | 6.90E-15 | 2.99E-14 |
| ERV3-1 | 1.606323 | 5.209961 | 7.01E-15 | 3.03E-14 |
| KRT3 | 3.582893 | -1.65764 | 7.09E-15 | 3.06E-14 |
| TDO2 | 1.662366 | 2.661899 | 7.12E-15 | 3.08E-14 |
| IVL | 4.312077 | 3.213525 | 7.18E-15 | 3.10E-14 |
| ASPHD2 | 1.371176 | 2.400886 | 7.22E-15 | 3.12E-14 |
| FBXO15 | -1.30142 | 1.002435 | 7.48E-15 | 3.23E-14 |
| SUN3 | 4.007778 | 0.161614 | 7.49E-15 | 3.23E-14 |
| MPP6 | 1.145747 | 3.991113 | 7.55E-15 | 3.26E-14 |
| PTGIS | -1.2398 | 5.183972 | 7.65E-15 | 3.30E-14 |
| TTC29 | -2.057 | 0.95902 | 7.74E-15 | 3.33E-14 |
| FETUB | 5.383368 | -1.98908 | 7.97E-15 | 3.43E-14 |
| KCNK9 | 3.830782 | 0.285862 | 8.09E-15 | 3.48E-14 |
| PSMA6 | 1.100737 | 3.003758 | 8.09E-15 | 3.48E-14 |
| ARHGAP39 | 1.044587 | 4.25243 | 8.11E-15 | 3.49E-14 |
| PPBP | -2.05525 | 1.368903 | 8.12E-15 | 3.49E-14 |
| RNF225 | 2.587575 | -1.02734 | 8.23E-15 | 3.54E-14 |
| SLC4A11 | 1.92556 | 3.656522 | 8.29E-15 | 3.56E-14 |
| KRT78 | 3.189183 | -0.54507 | 8.65E-15 | 3.71E-14 |
| EMB | 1.259677 | 6.774167 | 8.86E-15 | 3.80E-14 |
| ABCA6 | -1.1544 | 3.148216 | 8.90E-15 | 3.82E-14 |
| CACNB4 | -1.41746 | 2.183786 | 9.28E-15 | 3.98E-14 |
| SLC6A11 | 3.765131 | 1.066634 | 9.36E-15 | 4.01E-14 |
| ADGRG4 | -2.28876 | -3.26956 | 9.64E-15 | 4.13E-14 |
| C1QC | -1.08006 | 7.949385 | 9.72E-15 | 4.16E-14 |
| SYCE2 | 1.013082 | -0.65514 | 9.93E-15 | 4.25E-14 |
| VSTM2L | 2.093218 | 6.308946 | 9.96E-15 | 4.26E-14 |
| KLK12 | 6.104427 | 4.563161 | 1.00E-14 | 4.28E-14 |
| NOX4 | 1.352018 | 2.522875 | 1.02E-14 | 4.34E-14 |
| H4C2 | 5.596466 | -0.32752 | 1.02E-14 | 4.37E-14 |
| H3C7 | 6.63945 | -0.4789 | 1.03E-14 | 4.39E-14 |
| AARSD1 | 1.217891 | 0.63059 | 1.03E-14 | 4.40E-14 |
| WDR64 | 1.78261 | -1.64396 | 1.08E-14 | 4.59E-14 |
| FMO3 | -1.11696 | 3.829447 | 1.08E-14 | 4.61E-14 |
| NOL12 | 1.068209 | 1.636724 | 1.12E-14 | 4.77E-14 |
| FAXC | 1.332982 | 3.64627 | 1.14E-14 | 4.85E-14 |
| C1orf158 | -2.2345 | 0.619586 | 1.17E-14 | 4.97E-14 |
| SELENBP1 | -1.2154 | 7.969981 | 1.17E-14 | 4.97E-14 |
| DLX3 | 2.209552 | 2.077918 | 1.19E-14 | 5.07E-14 |
| SLC25A21 | 2.184629 | 1.283748 | 1.19E-14 | 5.08E-14 |
| FBXL8 | 1.053831 | 2.774256 | 1.20E-14 | 5.12E-14 |
| HLTF | 1.021775 | 4.687473 | 1.23E-14 | 5.21E-14 |
| HEPHL1 | 3.08107 | 0.816042 | 1.24E-14 | 5.25E-14 |
| HOXC6 | 2.368398 | 1.547306 | 1.27E-14 | 5.37E-14 |
| TMSB15A | -1.63078 | 0.184163 | 1.28E-14 | 5.42E-14 |
| CDK15 | -1.18465 | -0.03625 | 1.28E-14 | 5.43E-14 |
| CD163 | -1.16896 | 6.879823 | 1.37E-14 | 5.79E-14 |
| ETNK2 | 1.378662 | 2.999044 | 1.38E-14 | 5.84E-14 |
| TMPRSS11D | 4.292155 | -0.25162 | 1.41E-14 | 5.98E-14 |
| RETNLB | 4.916568 | -2.09055 | 1.42E-14 | 6.01E-14 |
| SCX | 1.889805 | 1.391908 | 1.42E-14 | 6.02E-14 |
| A2ML1 | 4.660354 | 2.354793 | 1.47E-14 | 6.20E-14 |
| LYG1 | 1.306626 | 0.035451 | 1.48E-14 | 6.27E-14 |
| ANKRD7 | 2.224814 | -1.22183 | 1.50E-14 | 6.34E-14 |
| COL4A3 | -1.40051 | 4.750548 | 1.54E-14 | 6.51E-14 |
| LRCH2 | -1.21369 | 2.620666 | 1.55E-14 | 6.52E-14 |
| PLD5 | 2.786629 | 2.581823 | 1.55E-14 | 6.52E-14 |
| LRRN4CL | -1.19095 | 0.653094 | 1.55E-14 | 6.52E-14 |
| GCAT | 1.140405 | 3.997232 | 1.56E-14 | 6.56E-14 |
| C19orf57 | 1.35359 | 1.457554 | 1.57E-14 | 6.62E-14 |
| WNT16 | 4.175654 | 1.977061 | 1.62E-14 | 6.84E-14 |
| RTEL1-TNFRSF6B | 1.416795 | 1.4192 | 1.65E-14 | 6.94E-14 |
| RERG | -1.06334 | 3.70686 | 1.68E-14 | 7.04E-14 |
| IGFL4 | 2.768716 | -1.4825 | 1.68E-14 | 7.06E-14 |
| ISYNA1 | 1.184441 | 5.611019 | 1.71E-14 | 7.18E-14 |
| TNNI2 | -1.41951 | 1.544705 | 1.71E-14 | 7.18E-14 |
| SLC35F3 | 2.219011 | 1.670513 | 1.73E-14 | 7.25E-14 |
| CD24 | 1.460057 | 8.260623 | 1.77E-14 | 7.41E-14 |
| AGTR2 | -2.3099 | 3.605494 | 1.78E-14 | 7.45E-14 |
| RBM14-RBM4 | 1.533066 | -0.78001 | 1.81E-14 | 7.57E-14 |
| CDA | 2.468831 | 4.168417 | 1.82E-14 | 7.63E-14 |
| TMEM249 | 2.532358 | -2.97681 | 1.83E-14 | 7.67E-14 |
| SH2D6 | 2.53925 | -0.72312 | 1.83E-14 | 7.67E-14 |
| SPIRE2 | 1.182374 | 4.561069 | 1.84E-14 | 7.69E-14 |
| FABP7 | 5.869345 | 2.095815 | 1.84E-14 | 7.69E-14 |
| FAT4 | -1.15449 | 4.534694 | 1.88E-14 | 7.88E-14 |
| FAM83B | 3.264579 | 1.747022 | 1.90E-14 | 7.95E-14 |
| ANKRD34A | 1.533447 | 1.037758 | 1.90E-14 | 7.95E-14 |
| CRHBP | -1.2006 | -1.50733 | 1.94E-14 | 8.10E-14 |
| RTEL1 | 1.135506 | -0.30137 | 1.98E-14 | 8.25E-14 |
| BACE2 | 1.506875 | 6.907875 | 2.02E-14 | 8.41E-14 |
| AQP6 | 2.898587 | -0.11855 | 2.04E-14 | 8.49E-14 |
| NPAS2 | 1.27964 | 4.36176 | 2.06E-14 | 8.60E-14 |
| FLACC1 | -1.40334 | 0.115805 | 2.07E-14 | 8.61E-14 |
| COL2A1 | 5.67803 | 3.76285 | 2.09E-14 | 8.69E-14 |
| COL6A3 | 1.260805 | 9.608784 | 2.11E-14 | 8.79E-14 |
| MFSD3 | 1.138248 | 4.464512 | 2.12E-14 | 8.80E-14 |
| SAPCD1 | 1.781069 | -1.19542 | 2.13E-14 | 8.85E-14 |
| RTL3 | -1.40487 | -2.79158 | 2.13E-14 | 8.85E-14 |
| CLEC9A | -1.24481 | -0.59449 | 2.13E-14 | 8.87E-14 |
| PNMA6A | 2.156656 | 1.451087 | 2.17E-14 | 9.01E-14 |
| HRG | 4.813629 | -1.32537 | 2.21E-14 | 9.19E-14 |
| MRPL12 | 1.225794 | 2.707657 | 2.26E-14 | 9.38E-14 |
| CBFA2T3 | -1.06897 | 2.829186 | 2.27E-14 | 9.43E-14 |
| RHOD | 1.2038 | 4.762186 | 2.36E-14 | 9.77E-14 |
| CD68 | -1.2167 | -2.94967 | 2.45E-14 | 1.02E-13 |
| RSPH10B2 | -1.78327 | -2.24183 | 2.46E-14 | 1.02E-13 |
| CAPSL | -2.04663 | 1.753615 | 2.51E-14 | 1.04E-13 |
| ACTG2 | -1.24244 | 4.453475 | 2.61E-14 | 1.08E-13 |
| USH1C | 3.964309 | 2.722053 | 2.62E-14 | 1.08E-13 |
| AC136428.1 | 2.521104 | -0.20546 | 2.62E-14 | 1.08E-13 |
| GGN | 1.143102 | -0.65549 | 2.63E-14 | 1.09E-13 |
| BPIFA1 | 5.188261 | 8.907189 | 2.64E-14 | 1.09E-13 |
| PPP1R16A | 1.020732 | 4.797612 | 2.71E-14 | 1.12E-13 |
| AKR1C4 | 4.963198 | 0.781988 | 2.75E-14 | 1.13E-13 |
| LRRTM4 | -1.76041 | -1.2455 | 2.83E-14 | 1.17E-13 |
| ARMC12 | 1.465093 | -0.77781 | 2.94E-14 | 1.21E-13 |
| SCNN1D | 1.548536 | 2.179527 | 2.94E-14 | 1.21E-13 |
| MST1R | 1.105622 | 5.581986 | 3.02E-14 | 1.24E-13 |
| MLLT11 | 2.14583 | 3.172606 | 3.03E-14 | 1.25E-13 |
| SLC13A5 | 3.713514 | 0.366791 | 3.05E-14 | 1.25E-13 |
| VARS2 | 1.41765 | -0.97354 | 3.08E-14 | 1.27E-13 |
| ENKUR | -1.58277 | 2.313826 | 3.12E-14 | 1.28E-13 |
| H2BC10 | 6.549795 | -0.65456 | 3.17E-14 | 1.30E-13 |
| HOXC12 | 8.106853 | 1.127347 | 3.20E-14 | 1.32E-13 |
| HILPDA | 1.604645 | 4.670224 | 3.32E-14 | 1.36E-13 |
| ASNS | 1.297267 | 0.047497 | 3.33E-14 | 1.37E-13 |
| GVQW3 | 1.129736 | 2.69615 | 3.33E-14 | 1.37E-13 |
| PERP | 1.024006 | 8.169531 | 3.36E-14 | 1.38E-13 |
| TGFBR3L | 2.061803 | -1.39825 | 3.42E-14 | 1.40E-13 |
| ADAMTSL5 | 1.524659 | 2.045485 | 3.43E-14 | 1.41E-13 |
| SINHCAF | 1.004798 | 6.217072 | 3.62E-14 | 1.48E-13 |
| MUC2 | 5.825565 | 2.686023 | 3.64E-14 | 1.49E-13 |
| LMLN2 | 5.045274 | -0.47252 | 3.77E-14 | 1.54E-13 |
| THRB | -1.04608 | 3.639193 | 3.79E-14 | 1.55E-13 |
| VGLL3 | -1.19983 | 4.981267 | 3.81E-14 | 1.56E-13 |
| ZG16B | 2.529166 | 2.958421 | 3.91E-14 | 1.60E-13 |
| GEMIN7 | 1.003066 | -1.01484 | 4.04E-14 | 1.65E-13 |
| NAT16 | 3.256113 | -2.07974 | 4.06E-14 | 1.66E-13 |
| TUBA4A | 1.060618 | 6.630834 | 4.07E-14 | 1.66E-13 |
| SCEL | -1.33788 | 6.123932 | 4.08E-14 | 1.66E-13 |
| FRMPD3 | 1.97701 | 2.095382 | 4.13E-14 | 1.68E-13 |
| ONECUT3 | 6.014996 | 0.698896 | 4.13E-14 | 1.68E-13 |
| CTH | 1.180531 | 3.028716 | 4.17E-14 | 1.70E-13 |
| USH1G | 3.444586 | -1.07195 | 4.27E-14 | 1.74E-13 |
| ELL3 | 1.466583 | -2.30332 | 4.43E-14 | 1.80E-13 |
| FCRL2 | 1.977529 | 2.126418 | 4.50E-14 | 1.83E-13 |
| ITGA2 | 1.597166 | 6.930062 | 4.56E-14 | 1.85E-13 |
| H3C1 | 3.850745 | -1.18775 | 4.65E-14 | 1.89E-13 |
| PSEN2 | 1.025074 | 0.709549 | 4.69E-14 | 1.90E-13 |
| OR10A6 | -2.09825 | -3.80976 | 4.71E-14 | 1.91E-13 |
| SALL3 | 5.522025 | -0.01548 | 4.71E-14 | 1.91E-13 |
| RNF157 | 1.566601 | 2.181103 | 4.72E-14 | 1.91E-13 |
| TRIM34 | 1.804487 | -1.82593 | 4.77E-14 | 1.94E-13 |
| TRIM16L | 1.955475 | 4.138974 | 4.84E-14 | 1.96E-13 |
| KIAA0408 | -1.77881 | -1.94158 | 4.87E-14 | 1.98E-13 |
| NTSR1 | 4.607698 | 1.361767 | 4.94E-14 | 2.00E-13 |
| CD69 | -1.12685 | 3.879895 | 4.97E-14 | 2.01E-13 |
| CNGB3 | 2.839244 | -0.93759 | 5.01E-14 | 2.03E-13 |
| UCN | 1.434462 | 0.206462 | 5.17E-14 | 2.09E-13 |
| TLX2 | 2.81824 | -1.74541 | 5.27E-14 | 2.13E-13 |
| PLBD1 | -1.06328 | 5.503585 | 5.39E-14 | 2.18E-13 |
| NLRP11 | 4.391783 | -0.09141 | 5.40E-14 | 2.18E-13 |
| TXNDC5 | 1.254798 | 0.0254 | 5.41E-14 | 2.18E-13 |
| MST1 | 1.344136 | 2.409308 | 5.49E-14 | 2.22E-13 |
| RHPN2 | 1.234976 | 5.332165 | 5.55E-14 | 2.24E-13 |
| PAX7 | 6.557105 | 3.624116 | 5.58E-14 | 2.25E-13 |
| LRRIQ4 | 2.097972 | -0.48202 | 5.66E-14 | 2.28E-13 |
| C5orf46 | 2.128951 | 0.474701 | 5.74E-14 | 2.31E-13 |
| TGM5 | 3.044875 | -0.86641 | 5.87E-14 | 2.36E-13 |
| KRT20 | 7.68294 | 4.243966 | 5.90E-14 | 2.38E-13 |
| PFN2 | 1.485364 | 6.558389 | 5.95E-14 | 2.40E-13 |
| RAET1L | 4.023393 | -1.74201 | 6.00E-14 | 2.42E-13 |
| MAGEA8 | 5.441037 | 0.441076 | 6.03E-14 | 2.43E-13 |
| AKAP14 | -2.03904 | 0.107311 | 6.07E-14 | 2.44E-13 |
| DLX1 | 3.343959 | -1.96053 | 6.17E-14 | 2.48E-13 |
| TSPAN32 | -1.08935 | 1.193902 | 6.26E-14 | 2.52E-13 |
| CFAP73 | -1.76108 | 1.214956 | 6.37E-14 | 2.56E-13 |
| ETNPPL | 6.178999 | 0.723648 | 6.65E-14 | 2.67E-13 |
| KRT4 | -2.08085 | 3.954001 | 6.68E-14 | 2.68E-13 |
| CCDC68 | -1.0197 | 3.963068 | 6.78E-14 | 2.72E-13 |
| C6orf15 | 5.694888 | -0.99072 | 6.85E-14 | 2.75E-13 |
| DCAF12L2 | 3.46947 | -0.86338 | 6.87E-14 | 2.75E-13 |
| ADGRG7 | 6.371671 | -0.47291 | 6.95E-14 | 2.78E-13 |
| FOXL2NB | 4.600948 | -2.28751 | 6.96E-14 | 2.78E-13 |
| TAC4 | 2.682214 | 0.661038 | 7.14E-14 | 2.86E-13 |
| FCGR1B | -1.0411 | 0.633149 | 7.22E-14 | 2.89E-13 |
| ANKRD18B | 2.828142 | 0.535867 | 7.28E-14 | 2.91E-13 |
| CALML5 | 7.418326 | 2.651598 | 7.28E-14 | 2.91E-13 |
| SOHLH1 | 5.512931 | -1.56941 | 7.44E-14 | 2.97E-13 |
| PRSS27 | 1.401272 | 1.628532 | 7.54E-14 | 3.01E-13 |
| MC4R | 2.715298 | -2.59681 | 7.57E-14 | 3.02E-13 |
| CALY | 4.017682 | 0.764602 | 7.59E-14 | 3.03E-13 |
| TNFRSF17 | 1.872941 | 2.077605 | 7.62E-14 | 3.04E-13 |
| CFAP97D2 | -2.07691 | -1.30569 | 7.63E-14 | 3.04E-13 |
| KRT1 | -1.769 | -0.91236 | 7.72E-14 | 3.08E-13 |
| CA10 | 4.95803 | 1.500535 | 7.73E-14 | 3.08E-13 |
| SLC30A2 | 3.006273 | 0.345955 | 7.85E-14 | 3.13E-13 |
| CABP7 | 2.665974 | -0.40813 | 7.95E-14 | 3.17E-13 |
| INSYN1 | -1.40386 | 1.561897 | 8.07E-14 | 3.21E-13 |
| BTBD16 | 2.315742 | 0.221084 | 8.22E-14 | 3.27E-13 |
| RIBC1 | -1.0694 | 1.959175 | 8.73E-14 | 3.47E-13 |
| VTCN1 | 2.841768 | 3.534818 | 8.73E-14 | 3.47E-13 |
| ZMAT4 | 4.843028 | 0.774068 | 8.93E-14 | 3.55E-13 |
| AQP1 | -1.47997 | 8.974331 | 8.94E-14 | 3.55E-13 |
| PI15 | 2.549857 | 3.617119 | 9.04E-14 | 3.59E-13 |
| ARHGAP33 | 1.330659 | 3.300067 | 9.11E-14 | 3.62E-13 |
| C16orf54 | -1.03508 | 3.141941 | 9.36E-14 | 3.71E-13 |
| EPHA8 | 3.740058 | -1.9354 | 9.80E-14 | 3.89E-13 |
| SLC9A4 | 5.698464 | 0.437043 | 1.00E-13 | 3.98E-13 |
| C1QL2 | 4.986107 | 1.522529 | 1.01E-13 | 4.02E-13 |
| CCN6 | 3.171274 | -0.11001 | 1.03E-13 | 4.10E-13 |
| H3C11 | 6.033603 | -1.14893 | 1.08E-13 | 4.27E-13 |
| MAGEA12 | 7.35662 | 2.345719 | 1.12E-13 | 4.44E-13 |
| HOXC8 | 2.72044 | 0.371571 | 1.13E-13 | 4.45E-13 |
| ZNF385B | -1.67361 | 4.416475 | 1.14E-13 | 4.49E-13 |
| SYT13 | 4.161469 | 4.128132 | 1.16E-13 | 4.56E-13 |
| GABRQ | 3.517816 | -0.71548 | 1.17E-13 | 4.63E-13 |
| SBSN | 4.352116 | 1.108782 | 1.18E-13 | 4.63E-13 |
| SLC5A5 | 3.531419 | 2.391096 | 1.18E-13 | 4.63E-13 |
| MAGEC2 | 7.848359 | 1.954478 | 1.19E-13 | 4.69E-13 |
| TGFA | 1.46453 | 5.466596 | 1.20E-13 | 4.73E-13 |
| TMEM212 | -2.16493 | 0.2344 | 1.20E-13 | 4.73E-13 |
| EPS8L1 | 1.295454 | 5.43199 | 1.22E-13 | 4.81E-13 |
| H4C1 | 5.419857 | -1.50873 | 1.22E-13 | 4.81E-13 |
| HAGHL | 1.331467 | 2.836751 | 1.23E-13 | 4.83E-13 |
| KCNN3 | -1.00148 | 3.397519 | 1.29E-13 | 5.07E-13 |
| ANKLE1 | 1.572555 | 0.442598 | 1.29E-13 | 5.07E-13 |
| HLA-DRA | -1.00521 | 10.87273 | 1.30E-13 | 5.09E-13 |
| JPH3 | 2.929424 | 0.957425 | 1.33E-13 | 5.22E-13 |
| SLC38A11 | 2.771862 | 1.010785 | 1.33E-13 | 5.22E-13 |
| TTC16 | -1.38182 | 0.7625 | 1.36E-13 | 5.31E-13 |
| SLAMF9 | 1.933069 | 0.308205 | 1.36E-13 | 5.34E-13 |
| CA7 | 2.725497 | -2.53595 | 1.40E-13 | 5.46E-13 |
| SPATA18 | -1.40702 | 4.061579 | 1.42E-13 | 5.53E-13 |
| MAGEA6 | 8.086622 | 2.959229 | 1.42E-13 | 5.56E-13 |
| C22orf15 | -1.67865 | 0.486151 | 1.45E-13 | 5.65E-13 |
| C1QTNF12 | 1.94535 | 0.656891 | 1.45E-13 | 5.66E-13 |
| LPO | 2.372941 | -1.05857 | 1.46E-13 | 5.69E-13 |
| SERPINB4 | 5.03092 | 1.339962 | 1.48E-13 | 5.77E-13 |
| CHAT | 6.035859 | 0.801023 | 1.48E-13 | 5.79E-13 |
| H4C11 | 2.140969 | -2.15042 | 1.51E-13 | 5.88E-13 |
| KRT86 | 1.656225 | 1.592678 | 1.54E-13 | 6.01E-13 |
| C20orf85 | -2.22911 | 3.610098 | 1.55E-13 | 6.02E-13 |
| MYBL1 | 1.226893 | 3.087937 | 1.63E-13 | 6.35E-13 |
| IPO4 | 1.191145 | -1.85326 | 1.64E-13 | 6.38E-13 |
| TNNC2 | 3.039701 | 3.359013 | 1.65E-13 | 6.44E-13 |
| COBL | -1.08577 | 5.270412 | 1.66E-13 | 6.47E-13 |
| AL139260.3 | 1.971748 | -3.29251 | 1.70E-13 | 6.61E-13 |
| CLDN9 | 2.337501 | 2.948436 | 1.74E-13 | 6.76E-13 |
| RET | 2.971155 | 3.745581 | 1.74E-13 | 6.78E-13 |
| STOML3 | -2.04363 | 1.370471 | 1.74E-13 | 6.78E-13 |
| LAMP5 | 1.542376 | 2.619657 | 1.75E-13 | 6.79E-13 |
| CBR3 | 1.791798 | 1.659176 | 1.76E-13 | 6.82E-13 |
| CCDC89 | -1.196 | 0.334571 | 1.80E-13 | 6.98E-13 |
| H3C6 | 1.877274 | 1.900128 | 1.85E-13 | 7.16E-13 |
| TTLL10 | -1.63979 | 1.024759 | 1.85E-13 | 7.18E-13 |
| OAS1 | 1.233313 | 6.412785 | 1.89E-13 | 7.33E-13 |
| C2orf73 | -1.69023 | -0.70609 | 1.91E-13 | 7.38E-13 |
| DSG4 | 4.739597 | -2.42811 | 1.93E-13 | 7.45E-13 |
| VSIG1 | 3.531785 | 6.021822 | 1.98E-13 | 7.66E-13 |
| DNAI2 | -1.95791 | 1.458006 | 2.13E-13 | 8.21E-13 |
| FAT1 | 1.20333 | 7.54743 | 2.13E-13 | 8.23E-13 |
| DDX4 | 2.699822 | -2.52591 | 2.14E-13 | 8.27E-13 |
| P2RX2 | -1.69887 | -1.05174 | 2.18E-13 | 8.41E-13 |
| CYS1 | -1.4424 | 3.168644 | 2.20E-13 | 8.48E-13 |
| UNC13A | 2.79112 | 2.15884 | 2.22E-13 | 8.55E-13 |
| A1CF | 4.494172 | -0.30272 | 2.28E-13 | 8.78E-13 |
| C5orf49 | -1.5428 | 2.870051 | 2.29E-13 | 8.80E-13 |
| GLYATL2 | 4.603586 | 1.015079 | 2.31E-13 | 8.90E-13 |
| PABPN1 | 1.09929 | 3.600953 | 2.36E-13 | 9.09E-13 |
| H2AC21 | 5.409949 | -0.64773 | 2.37E-13 | 9.12E-13 |
| ZNF280A | 5.102932 | -1.92553 | 2.39E-13 | 9.19E-13 |
| CAMK2B | 2.954979 | 1.671637 | 2.41E-13 | 9.27E-13 |
| INSYN2A | 2.358807 | 1.156897 | 2.43E-13 | 9.33E-13 |
| MUC16 | 2.941399 | 6.124129 | 2.46E-13 | 9.42E-13 |
| PRKCG | 2.590262 | -1.1114 | 2.46E-13 | 9.43E-13 |
| KRT75 | 6.229394 | 0.219042 | 2.47E-13 | 9.48E-13 |
| FGF14 | -1.20744 | 1.688882 | 2.50E-13 | 9.60E-13 |
| MDFI | 1.471597 | 4.733471 | 2.57E-13 | 9.87E-13 |
| CEL | 3.217671 | 2.28903 | 2.59E-13 | 9.93E-13 |
| F5 | 2.34817 | 4.552599 | 2.61E-13 | 1.00E-12 |
| MDH1B | -1.37571 | 1.220086 | 2.64E-13 | 1.01E-12 |
| ADAMTS4 | -1.26703 | 4.882841 | 2.67E-13 | 1.02E-12 |
| DMRT1 | 4.309058 | -2.13662 | 2.68E-13 | 1.02E-12 |
| SLC14A2 | 4.311439 | 2.952516 | 2.68E-13 | 1.03E-12 |
| MEIOB | 3.187984 | -0.05167 | 2.75E-13 | 1.05E-12 |
| TNFRSF11A | 1.221721 | 3.477918 | 2.76E-13 | 1.05E-12 |
| IL2RA | 1.410435 | 3.399769 | 2.77E-13 | 1.06E-12 |
| VWDE | 2.098018 | 2.206806 | 2.77E-13 | 1.06E-12 |
| NEB | 2.034104 | 2.903999 | 2.77E-13 | 1.06E-12 |
| THEG | 3.480227 | -1.10926 | 2.82E-13 | 1.07E-12 |
| OAT | 1.008181 | 7.226264 | 2.87E-13 | 1.09E-12 |
| SLC18A3 | 6.528762 | -1.07029 | 2.95E-13 | 1.13E-12 |
| DMGDH | 1.837494 | 1.839043 | 2.96E-13 | 1.13E-12 |
| DCDC2B | -1.50584 | 0.155247 | 2.96E-13 | 1.13E-12 |
| ELOVL4 | 2.004841 | 1.296286 | 2.98E-13 | 1.13E-12 |
| ADGB | -1.99801 | 0.432641 | 2.98E-13 | 1.13E-12 |
| HOXD4 | 2.52943 | 0.060757 | 2.98E-13 | 1.13E-12 |
| OPRD1 | 2.272876 | 1.000629 | 3.03E-13 | 1.15E-12 |
| SYTL2 | 1.133443 | 5.674154 | 3.14E-13 | 1.19E-12 |
| LOXL1 | 1.075504 | 4.790422 | 3.15E-13 | 1.20E-12 |
| SYNDIG1 | 1.67246 | 1.763333 | 3.22E-13 | 1.22E-12 |
| CFAP43 | -1.54321 | 3.219987 | 3.23E-13 | 1.23E-12 |
| MAP1LC3C | -1.39004 | 1.602339 | 3.32E-13 | 1.26E-12 |
| EVX1 | 4.878269 | -2.47404 | 3.37E-13 | 1.28E-12 |
| SOD3 | -1.0394 | 5.597181 | 3.46E-13 | 1.31E-12 |
| SLC38A3 | 3.101725 | 1.114877 | 3.48E-13 | 1.32E-12 |
| TEKT4 | -1.69266 | -0.62306 | 3.55E-13 | 1.35E-12 |
| RNF222 | 2.593598 | -1.93535 | 3.62E-13 | 1.37E-12 |
| BEX5 | -1.22927 | 2.077995 | 3.74E-13 | 1.42E-12 |
| S100A16 | 1.271396 | 7.803494 | 3.76E-13 | 1.42E-12 |
| KCNU1 | 6.361362 | -0.59366 | 3.79E-13 | 1.43E-12 |
| SLC2A3 | -1.05513 | 6.355011 | 3.79E-13 | 1.43E-12 |
| HOXB8 | 3.546043 | 1.825539 | 3.83E-13 | 1.45E-12 |
| EME2 | 1.084186 | 3.528765 | 3.85E-13 | 1.45E-12 |
| SIGLEC6 | -1.32983 | 1.528602 | 3.90E-13 | 1.47E-12 |
| GFRA1 | -1.49409 | 2.859335 | 4.00E-13 | 1.51E-12 |
| CLDN11 | -1.29516 | 2.442015 | 4.05E-13 | 1.53E-12 |
| IFITM10 | 1.717341 | 0.857855 | 4.09E-13 | 1.54E-12 |
| GAMT | 1.187798 | 3.812101 | 4.11E-13 | 1.55E-12 |
| B3GAT1 | 2.305579 | 2.723339 | 4.18E-13 | 1.57E-12 |
| PHYHIPL | 3.037919 | -0.01092 | 4.24E-13 | 1.60E-12 |
| CEACAM8 | -2.0989 | -0.12215 | 4.24E-13 | 1.60E-12 |
| TRMT9B | -1.16182 | 2.063606 | 4.30E-13 | 1.62E-12 |
| SLC9A3R1 | 1.00051 | 6.164292 | 4.33E-13 | 1.63E-12 |
| SPRR2D | 4.913838 | 1.94246 | 4.37E-13 | 1.64E-12 |
| IL17REL | 2.521423 | 0.092262 | 4.45E-13 | 1.67E-12 |
| IGDCC4 | 1.225075 | 1.998693 | 4.82E-13 | 1.81E-12 |
| BTBD11 | 1.865934 | 2.423053 | 4.93E-13 | 1.85E-12 |
| CARMIL2 | 1.345787 | 2.974654 | 4.99E-13 | 1.87E-12 |
| MAGEA10 | 7.862192 | 1.849236 | 5.02E-13 | 1.88E-12 |
| TRPC3 | -1.22564 | -0.19219 | 5.03E-13 | 1.88E-12 |
| CACNA1I | 2.108239 | 1.124597 | 5.06E-13 | 1.89E-12 |
| IL19 | 2.270113 | -1.52382 | 5.07E-13 | 1.89E-12 |
| FOXD2 | 1.140791 | 0.982956 | 5.12E-13 | 1.91E-12 |
| PSD | 1.100388 | 2.164556 | 5.17E-13 | 1.93E-12 |
| DMRTC2 | 5.518241 | -1.10013 | 5.21E-13 | 1.95E-12 |
| C18orf63 | -1.99638 | -2.05787 | 5.31E-13 | 1.98E-12 |
| F7 | 2.985286 | 0.368034 | 5.36E-13 | 2.00E-12 |
| FOXE3 | 3.122006 | -2.4374 | 5.36E-13 | 2.00E-12 |
| SLC6A17 | 2.578202 | 0.246872 | 5.37E-13 | 2.00E-12 |
| ADGRF1 | 2.442679 | 6.467926 | 5.39E-13 | 2.01E-12 |
| FAM186B | 1.134889 | -0.73604 | 5.40E-13 | 2.01E-12 |
| AMBP | 3.56102 | 3.741466 | 5.43E-13 | 2.02E-12 |
| BATF | 1.146651 | 3.848401 | 5.61E-13 | 2.09E-12 |
| H2AC17 | 2.897849 | -3.55431 | 5.65E-13 | 2.10E-12 |
| ITIH6 | 3.137429 | -1.20522 | 5.75E-13 | 2.14E-12 |
| OTULINL | -1.15437 | 5.843974 | 5.86E-13 | 2.18E-12 |
| CPNE5 | 1.262596 | 3.373798 | 6.03E-13 | 2.24E-12 |
| PSG1 | 8.236579 | -0.33843 | 6.05E-13 | 2.25E-12 |
| UGT1A10 | 7.736297 | 0.764474 | 6.14E-13 | 2.28E-12 |
| ARSL | 2.04846 | 4.999621 | 6.14E-13 | 2.28E-12 |
| KCNJ15 | -1.35901 | 6.096477 | 6.20E-13 | 2.30E-12 |
| SYT6 | 2.606155 | -1.36776 | 6.24E-13 | 2.31E-12 |
| LBP | 4.940542 | 3.121265 | 6.34E-13 | 2.35E-12 |
| ERICH3 | -2.02799 | 2.78184 | 6.37E-13 | 2.36E-12 |
| SLC38A8 | 4.401276 | -0.65354 | 6.45E-13 | 2.39E-12 |
| SMIM36 | 3.628159 | -3.2008 | 6.59E-13 | 2.44E-12 |
| TEKT2 | -1.5943 | 2.366492 | 6.59E-13 | 2.44E-12 |
| SPTBN5 | 1.33289 | 2.744653 | 6.62E-13 | 2.45E-12 |
| F2RL1 | 1.352003 | 5.05518 | 6.66E-13 | 2.46E-12 |
| CDHR5 | 3.610544 | 2.092028 | 6.72E-13 | 2.48E-12 |
| NRIP3 | 1.780508 | 3.399443 | 6.76E-13 | 2.50E-12 |
| HOXC4 | 1.712498 | 1.379998 | 6.82E-13 | 2.52E-12 |
| EMX1 | 3.235318 | -1.6039 | 6.83E-13 | 2.52E-12 |
| RGR | -2.00353 | -3.7993 | 6.85E-13 | 2.53E-12 |
| TFF3 | 3.046865 | 7.088078 | 7.10E-13 | 2.62E-12 |
| RSPH10B | -1.46865 | -2.33246 | 7.14E-13 | 2.63E-12 |
| GALNT16 | -1.28289 | 1.783019 | 7.24E-13 | 2.67E-12 |
| H2AC6 | 1.2315 | 5.970165 | 7.26E-13 | 2.68E-12 |
| C10orf90 | 3.855785 | -1.86666 | 7.31E-13 | 2.69E-12 |
| ISG15 | 1.559256 | 6.642667 | 7.47E-13 | 2.75E-12 |
| SMPX | 2.751213 | -1.19957 | 7.73E-13 | 2.84E-12 |
| COL11A2 | 2.762322 | 2.513165 | 7.82E-13 | 2.87E-12 |
| LIN28B | 7.572419 | -0.02771 | 7.95E-13 | 2.92E-12 |
| KCNA7 | 2.613828 | -2.31452 | 8.09E-13 | 2.97E-12 |
| ZNF572 | 1.085939 | 1.691495 | 8.11E-13 | 2.98E-12 |
| ANKRD40CL | 4.184382 | -2.15242 | 8.29E-13 | 3.04E-12 |
| INSRR | 2.902388 | -1.57726 | 8.39E-13 | 3.08E-12 |
| AHSP | -1.75874 | -3.37409 | 8.57E-13 | 3.14E-12 |
| FSTL4 | 2.564173 | 4.330642 | 8.60E-13 | 3.15E-12 |
| ZBTB8B | 2.573264 | -0.8216 | 8.63E-13 | 3.16E-12 |
| AHSG | 3.930954 | -2.21051 | 8.65E-13 | 3.17E-12 |
| LIN28A | 6.303494 | 0.106762 | 8.73E-13 | 3.20E-12 |
| RNF103-CHMP3 | 1.952083 | -2.7506 | 8.77E-13 | 3.21E-12 |
| ASAH2 | 1.166397 | 0.109633 | 8.81E-13 | 3.23E-12 |
| CAPS | -1.33203 | 5.479331 | 9.16E-13 | 3.35E-12 |
| DNM1 | 1.174617 | 3.868763 | 9.21E-13 | 3.37E-12 |
| WDR87 | 4.106099 | 0.243759 | 9.27E-13 | 3.39E-12 |
| CGB5 | 7.447907 | 0.896429 | 9.41E-13 | 3.44E-12 |
| TUBA3D | 1.206443 | -1.34168 | 9.60E-13 | 3.51E-12 |
| MSRB1 | 1.072195 | 6.048757 | 1.01E-12 | 3.67E-12 |
| SLC1A7 | 3.055331 | 5.086069 | 1.01E-12 | 3.69E-12 |
| BCL2L14 | 1.445275 | 1.960414 | 1.03E-12 | 3.74E-12 |
| ADAMTS20 | 4.565968 | -1.13604 | 1.03E-12 | 3.76E-12 |
| AC013394.1 | 2.541219 | 0.49393 | 1.06E-12 | 3.85E-12 |
| ERVV-2 | 5.004018 | -1.59331 | 1.06E-12 | 3.87E-12 |
| SPOUT1 | 1.574763 | -2.55933 | 1.07E-12 | 3.89E-12 |
| GFRA3 | 2.987418 | 4.639899 | 1.08E-12 | 3.92E-12 |
| CAPN14 | 2.128068 | 0.200668 | 1.08E-12 | 3.92E-12 |
| GBP7 | -1.51787 | -3.08969 | 1.10E-12 | 4.01E-12 |
| ZACN | 2.864037 | -0.83083 | 1.11E-12 | 4.04E-12 |
| ERN2 | 3.104226 | 4.707685 | 1.12E-12 | 4.06E-12 |
| TRPA1 | 2.555638 | 0.188998 | 1.13E-12 | 4.09E-12 |
| DOCK3 | 1.677406 | 2.260891 | 1.16E-12 | 4.21E-12 |
| BRSK2 | 2.018133 | 1.215549 | 1.19E-12 | 4.33E-12 |
| ADPRHL1 | 1.419554 | 3.25421 | 1.21E-12 | 4.38E-12 |
| MAS1L | -1.80584 | -3.24902 | 1.22E-12 | 4.41E-12 |
| H2BC3 | 6.39518 | -0.72702 | 1.22E-12 | 4.43E-12 |
| ASIC1 | 1.342626 | 2.04537 | 1.22E-12 | 4.43E-12 |
| SMIM31 | 2.713082 | 2.477321 | 1.23E-12 | 4.45E-12 |
| MMP15 | 1.060445 | 6.72597 | 1.24E-12 | 4.48E-12 |
| PKDCC | -1.1463 | 4.215453 | 1.24E-12 | 4.50E-12 |
| PTPRD | -1.05149 | 3.205721 | 1.25E-12 | 4.54E-12 |
| UST | -1.03251 | 3.611576 | 1.26E-12 | 4.54E-12 |
| TMPRSS13 | 1.170813 | 5.08498 | 1.26E-12 | 4.55E-12 |
| ADGRD1 | -1.24589 | 5.49907 | 1.27E-12 | 4.60E-12 |
| CLRN3 | 2.904593 | -0.2118 | 1.29E-12 | 4.66E-12 |
| GPR179 | 1.42199 | -0.63064 | 1.30E-12 | 4.69E-12 |
| TAC3 | 5.08396 | 0.219873 | 1.30E-12 | 4.70E-12 |
| ZBP1 | 1.25667 | 2.661744 | 1.30E-12 | 4.70E-12 |
| TAF1L | 2.876825 | -2.15046 | 1.33E-12 | 4.80E-12 |
| SPDYE3 | 2.406042 | -1.89372 | 1.33E-12 | 4.80E-12 |
| CHODL | 2.104696 | 1.44883 | 1.33E-12 | 4.81E-12 |
| GIMAP5 | -1.18614 | 0.982389 | 1.34E-12 | 4.81E-12 |
| CA6 | 4.317795 | -0.45363 | 1.38E-12 | 4.96E-12 |
| PGF | 1.42861 | 3.782813 | 1.40E-12 | 5.03E-12 |
| CRTAM | -1.03761 | 1.508245 | 1.41E-12 | 5.06E-12 |
| UFSP1 | 1.031358 | 1.030091 | 1.44E-12 | 5.16E-12 |
| ZNF322 | 1.179811 | 3.529079 | 1.46E-12 | 5.24E-12 |
| STPG3 | 1.960865 | -1.16765 | 1.47E-12 | 5.29E-12 |
| DNAH9 | -1.98197 | 3.277246 | 1.48E-12 | 5.31E-12 |
| TEX19 | 4.523685 | -0.85361 | 1.55E-12 | 5.56E-12 |
| MAGEA11 | 7.066823 | -0.58657 | 1.58E-12 | 5.66E-12 |
| TMPRSS11A | 4.197676 | -1.75507 | 1.59E-12 | 5.70E-12 |
| ZNF474 | -1.40311 | 0.351068 | 1.61E-12 | 5.77E-12 |
| CNTNAP4 | 4.836559 | -2.48358 | 1.69E-12 | 6.02E-12 |
| NPTX2 | 2.535377 | 3.032117 | 1.70E-12 | 6.07E-12 |
| KIAA1549L | 2.174859 | 1.563117 | 1.71E-12 | 6.11E-12 |
| TM4SF20 | 6.25038 | 1.572519 | 1.76E-12 | 6.28E-12 |
| B4GALNT2 | 3.655501 | 3.190474 | 1.76E-12 | 6.29E-12 |
| PCDH7 | 1.724387 | 4.834764 | 1.77E-12 | 6.32E-12 |
| NAALADL2 | 1.20984 | 4.308183 | 1.82E-12 | 6.49E-12 |
| ISM2 | 3.302156 | -1.32581 | 1.83E-12 | 6.53E-12 |
| TGM4 | -1.44149 | -1.95768 | 1.84E-12 | 6.57E-12 |
| KCNC2 | 5.67473 | -0.72873 | 1.84E-12 | 6.57E-12 |
| TSNAXIP1 | -1.2975 | 0.918419 | 1.85E-12 | 6.59E-12 |
| VSIG10L | 1.881073 | 3.379797 | 1.87E-12 | 6.64E-12 |
| POU2AF1 | 1.618135 | 4.763303 | 1.89E-12 | 6.73E-12 |
| ARSF | -1.37804 | -3.35738 | 1.91E-12 | 6.78E-12 |
| APOBEC3A | -1.26019 | 1.190413 | 1.91E-12 | 6.79E-12 |
| CNTNAP2 | 2.904707 | 3.00913 | 1.97E-12 | 7.00E-12 |
| COL9A1 | 2.392015 | -1.22791 | 1.99E-12 | 7.08E-12 |
| TIGIT | 1.211026 | 3.311726 | 2.07E-12 | 7.34E-12 |
| SLC30A10 | 5.314398 | -0.38591 | 2.07E-12 | 7.34E-12 |
| CARD17 | 1.8406 | -1.95206 | 2.08E-12 | 7.39E-12 |
| MS4A3 | -1.74824 | -3.37994 | 2.12E-12 | 7.52E-12 |
| FAM180A | -1.21964 | 0.733448 | 2.13E-12 | 7.54E-12 |
| NCBP2L | -1.33769 | -2.57743 | 2.17E-12 | 7.71E-12 |
| AKR1D1 | 2.641173 | -2.55289 | 2.23E-12 | 7.89E-12 |
| CRACD | 1.450954 | 2.641857 | 2.24E-12 | 7.92E-12 |
| PMEL | 1.04391 | 2.136277 | 2.26E-12 | 8.01E-12 |
| MEOX2 | -1.09124 | 2.690058 | 2.27E-12 | 8.04E-12 |
| KISS1 | 2.011777 | 0.005044 | 2.34E-12 | 8.26E-12 |
| IGFL3 | 4.055017 | -2.5006 | 2.36E-12 | 8.35E-12 |
| ABCA10 | -1.19943 | 1.043908 | 2.41E-12 | 8.52E-12 |
| ARMC4 | -1.57943 | 2.037893 | 2.43E-12 | 8.59E-12 |
| SLC6A12 | -1.04121 | 1.908963 | 2.45E-12 | 8.64E-12 |
| ART1 | -1.64973 | -2.89385 | 2.46E-12 | 8.69E-12 |
| C1orf53 | 1.11106 | 2.112119 | 2.47E-12 | 8.72E-12 |
| KRT17 | 2.734293 | 7.05686 | 2.50E-12 | 8.81E-12 |
| C8orf74 | 4.601716 | -1.73162 | 2.51E-12 | 8.83E-12 |
| C1QL4 | 3.265781 | -2.09264 | 2.52E-12 | 8.87E-12 |
| SP9 | 5.853574 | -1.72645 | 2.52E-12 | 8.88E-12 |
| ERICH2 | -1.09376 | 1.725097 | 2.54E-12 | 8.96E-12 |
| GALR2 | 2.239437 | -1.23099 | 2.61E-12 | 9.20E-12 |
| MYPN | 3.810009 | -0.84542 | 2.62E-12 | 9.24E-12 |
| MAGEA9B | 6.991161 | -1.48539 | 2.64E-12 | 9.30E-12 |
| NR5A1 | 3.333102 | -1.83885 | 2.67E-12 | 9.38E-12 |
| CPN1 | 7.766724 | -0.62327 | 2.67E-12 | 9.39E-12 |
| FAM83F | 2.440645 | 3.512331 | 2.83E-12 | 9.95E-12 |
| MAL | -1.21569 | 2.903487 | 2.85E-12 | 1.00E-11 |
| PRRT1B | -1.32348 | 1.616298 | 2.88E-12 | 1.01E-11 |
| ATOH7 | 2.148204 | -2.28281 | 2.90E-12 | 1.02E-11 |
| KCNMB2 | -1.43239 | -1.08136 | 2.92E-12 | 1.02E-11 |
| PCSK1N | 2.347273 | 3.562912 | 2.92E-12 | 1.03E-11 |
| ZNF365 | -1.13694 | 0.982141 | 2.94E-12 | 1.03E-11 |
| KRT19 | 1.236542 | 9.670461 | 2.96E-12 | 1.04E-11 |
| ZNF117 | 1.337707 | 5.689897 | 2.96E-12 | 1.04E-11 |
| HOXA1 | 2.077376 | 0.996047 | 3.10E-12 | 1.08E-11 |
| WNT7A | -1.90399 | 2.450782 | 3.10E-12 | 1.09E-11 |
| COX7B2 | 7.518419 | -0.35533 | 3.16E-12 | 1.10E-11 |
| CA5A | 2.75609 | -1.94919 | 3.19E-12 | 1.11E-11 |
| AKR1C1 | 3.277931 | 8.297302 | 3.31E-12 | 1.15E-11 |
| MFSD6L | 1.996535 | 2.479887 | 3.35E-12 | 1.17E-11 |
| ISL1 | 4.310877 | 0.233258 | 3.36E-12 | 1.17E-11 |
| MYLK3 | -1.32547 | 0.504082 | 3.42E-12 | 1.19E-11 |
| AL360181.3 | 1.11656 | -0.85623 | 3.45E-12 | 1.20E-11 |
| EFCAB13 | 1.296385 | 1.916394 | 3.49E-12 | 1.22E-11 |
| UGT2B28 | 5.043497 | -2.46229 | 3.51E-12 | 1.22E-11 |
| AMN | 1.871319 | 3.508643 | 3.58E-12 | 1.25E-11 |
| TUBB2A | 1.146931 | 4.271325 | 3.59E-12 | 1.25E-11 |
| OR4C6 | 4.362316 | -2.41724 | 3.69E-12 | 1.28E-11 |
| HOXA4 | -1.37199 | -2.13813 | 3.74E-12 | 1.30E-11 |
| ELAVL4 | 1.90455 | -0.04062 | 3.86E-12 | 1.34E-11 |
| WNT6 | 2.026765 | -1.43627 | 3.90E-12 | 1.35E-11 |
| OBP2A | 4.325319 | 0.189159 | 3.92E-12 | 1.36E-11 |
| RUNDC3A | 2.235394 | 1.289508 | 3.99E-12 | 1.39E-11 |
| TUBB4A | 2.334849 | 0.860705 | 4.07E-12 | 1.41E-11 |
| LRRC4 | -1.20653 | 3.586907 | 4.09E-12 | 1.42E-11 |
| REG1A | 7.636248 | 3.018707 | 4.16E-12 | 1.44E-11 |
| SPAG8 | -1.19952 | 1.318694 | 4.20E-12 | 1.45E-11 |
| SYCP2 | 1.912374 | 2.953475 | 4.23E-12 | 1.47E-11 |
| GDA | 3.488632 | 2.014819 | 4.29E-12 | 1.49E-11 |
| C7orf61 | 1.439622 | -1.7396 | 4.30E-12 | 1.49E-11 |
| NECAB2 | 2.605492 | 0.185884 | 4.31E-12 | 1.49E-11 |
| TBX6 | 1.159506 | 1.905383 | 4.48E-12 | 1.55E-11 |
| HLA-DOA | -1.00399 | 6.413427 | 4.54E-12 | 1.57E-11 |
| GRB14 | 1.595673 | 3.335244 | 4.55E-12 | 1.57E-11 |
| FBXO47 | 2.613348 | -3.12238 | 4.68E-12 | 1.61E-11 |
| PLEKHG4 | 1.193189 | 4.606116 | 4.78E-12 | 1.65E-11 |
| C4BPB | 2.262842 | 3.53801 | 4.81E-12 | 1.66E-11 |
| FZD9 | 2.576591 | 1.162154 | 4.81E-12 | 1.66E-11 |
| MND1 | 2.622291 | -3.35085 | 4.83E-12 | 1.66E-11 |
| CST2 | 2.262919 | 1.398821 | 4.85E-12 | 1.67E-11 |
| NGB | 5.427502 | -1.87433 | 4.90E-12 | 1.69E-11 |
| DHRS2 | 3.332777 | 3.261928 | 4.94E-12 | 1.70E-11 |
| KRTAP2-3 | 3.92214 | -2.50335 | 4.99E-12 | 1.72E-11 |
| ERFL | 1.392121 | 0.383713 | 5.05E-12 | 1.74E-11 |
| ECT2L | -1.58655 | 1.488519 | 5.05E-12 | 1.74E-11 |
| SAMD5 | -1.14806 | 3.215886 | 5.12E-12 | 1.76E-11 |
| CBR1 | 1.895156 | 7.339894 | 5.23E-12 | 1.80E-11 |
| ERBB2 | 1.054464 | 8.503034 | 5.26E-12 | 1.81E-11 |
| SPEF1 | -1.40903 | 1.423466 | 5.36E-12 | 1.84E-11 |
| HLF | -1.33801 | 4.798928 | 5.38E-12 | 1.85E-11 |
| C16orf71 | -1.06908 | 1.503589 | 5.47E-12 | 1.88E-11 |
| PTGR1 | 1.387917 | 6.096076 | 5.55E-12 | 1.90E-11 |
| LRAT | 1.913319 | 2.435089 | 5.58E-12 | 1.91E-11 |
| RDH10 | 1.42151 | 7.040163 | 5.58E-12 | 1.91E-11 |
| C6orf118 | -1.95325 | 1.0154 | 5.83E-12 | 2.00E-11 |
| QPRT | 1.552103 | 5.945389 | 5.93E-12 | 2.03E-11 |
| NCAN | 2.533211 | -2.97957 | 6.03E-12 | 2.06E-11 |
| NSG2 | 4.720963 | 1.553083 | 6.18E-12 | 2.11E-11 |
| INSM1 | 4.483355 | 2.305788 | 6.22E-12 | 2.13E-11 |
| TXNRD1 | 1.583337 | 8.773017 | 6.24E-12 | 2.13E-11 |
| STMN1 | 1.060451 | 7.265657 | 6.31E-12 | 2.15E-11 |
| P2RX6 | -1.2708 | -0.66527 | 6.64E-12 | 2.26E-11 |
| HOXA11 | 4.130778 | -0.6694 | 6.75E-12 | 2.30E-11 |
| ELOVL2 | 1.724449 | 1.243328 | 6.76E-12 | 2.30E-11 |
| CADM4 | 1.02745 | 4.74518 | 6.83E-12 | 2.32E-11 |
| NDP | 3.235975 | 0.301162 | 6.91E-12 | 2.35E-11 |
| PRR29 | -1.04938 | 2.461685 | 6.92E-12 | 2.36E-11 |
| MCF2 | 2.554411 | -0.83635 | 6.98E-12 | 2.37E-11 |
| TNFRSF9 | 1.408141 | 3.033181 | 7.12E-12 | 2.42E-11 |
| KIF6 | -1.26348 | 1.304299 | 7.13E-12 | 2.42E-11 |
| SEMA3A | 1.794091 | 4.692645 | 7.18E-12 | 2.44E-11 |
| FOXL2 | 4.368061 | -1.81634 | 7.20E-12 | 2.45E-11 |
| C17orf78 | 2.42085 | -2.22437 | 7.21E-12 | 2.45E-11 |
| PHOX2B | 6.382891 | -1.30857 | 7.23E-12 | 2.45E-11 |
| DNAI1 | -1.71842 | 1.930479 | 7.28E-12 | 2.47E-11 |
| SLC52A3 | 1.140033 | 3.538421 | 7.35E-12 | 2.49E-11 |
| TNNI3 | 2.771977 | 0.563739 | 7.43E-12 | 2.52E-11 |
| STAB2 | -1.14228 | 0.654281 | 7.44E-12 | 2.52E-11 |
| ZNF648 | 2.890532 | -2.37438 | 7.59E-12 | 2.57E-11 |
| XIRP2 | -1.89956 | -2.89979 | 7.67E-12 | 2.60E-11 |
| CIB2 | 1.279812 | 2.472508 | 7.87E-12 | 2.66E-11 |
| GPR88 | 1.674727 | -0.50374 | 7.92E-12 | 2.68E-11 |
| ENHO | -1.4475 | -0.95916 | 7.99E-12 | 2.70E-11 |
| FAM90A1 | 1.525924 | 1.092767 | 8.15E-12 | 2.75E-11 |
| ALKAL1 | 2.0536 | 0.722774 | 8.30E-12 | 2.80E-11 |
| MAGEC3 | 3.902224 | -1.28786 | 8.34E-12 | 2.82E-11 |
| EIF4E1B | 5.923196 | -0.68868 | 8.54E-12 | 2.88E-11 |
| LRFN4 | 1.211298 | 3.556086 | 8.81E-12 | 2.97E-11 |
| GALNT13 | -1.58156 | 2.251304 | 8.93E-12 | 3.01E-11 |
| IL17RD | 1.279134 | 3.104854 | 8.96E-12 | 3.02E-11 |
| PIWIL3 | 6.052273 | -0.19588 | 9.09E-12 | 3.06E-11 |
| P3H3 | 1.1324 | 4.681807 | 9.25E-12 | 3.11E-11 |
| PDE1C | -1.32065 | 2.717178 | 9.30E-12 | 3.13E-11 |
| DISP3 | 2.195533 | -0.23062 | 9.36E-12 | 3.15E-11 |
| HOXD13 | 6.595827 | -0.15767 | 9.37E-12 | 3.15E-11 |
| SLC5A12 | 2.938917 | 0.331973 | 9.40E-12 | 3.16E-11 |
| PNOC | 1.592224 | 0.25338 | 9.42E-12 | 3.16E-11 |
| H4-16 | 1.478676 | 1.057834 | 9.43E-12 | 3.17E-11 |
| AKR1E2 | 1.344305 | 1.910625 | 9.54E-12 | 3.20E-11 |
| LGALS4 | 3.927059 | 5.896656 | 9.59E-12 | 3.22E-11 |
| LHX8 | 5.361582 | -1.38361 | 9.63E-12 | 3.23E-11 |
| ODAPH | 2.599839 | -1.4188 | 9.64E-12 | 3.23E-11 |
| MT1A | -1.721 | 1.518179 | 9.81E-12 | 3.29E-11 |
| ENPP3 | 2.203257 | 3.450595 | 1.02E-11 | 3.43E-11 |
| RSPH14 | -1.45072 | 0.150245 | 1.03E-11 | 3.44E-11 |
| KIF12 | 1.802592 | 3.818101 | 1.03E-11 | 3.45E-11 |
| CD27 | 1.274283 | 2.469343 | 1.04E-11 | 3.49E-11 |
| MAGEA1 | 7.220095 | 1.736322 | 1.04E-11 | 3.49E-11 |
| CYP26B1 | -1.05972 | 2.823656 | 1.06E-11 | 3.55E-11 |
| ASCL1 | 5.118413 | 5.143272 | 1.10E-11 | 3.67E-11 |
| ALX3 | 4.229212 | -2.53422 | 1.11E-11 | 3.70E-11 |
| GIP | 4.225391 | -2.61227 | 1.12E-11 | 3.73E-11 |
| H3C13 | 2.673279 | -1.46869 | 1.13E-11 | 3.76E-11 |
| SPDYE16 | -1.38992 | -2.81213 | 1.15E-11 | 3.85E-11 |
| BPIFB2 | 4.751711 | 4.734473 | 1.16E-11 | 3.88E-11 |
| NR1I2 | 2.590004 | 0.349306 | 1.20E-11 | 4.00E-11 |
| IL27 | -1.057 | -1.57391 | 1.22E-11 | 4.08E-11 |
| ACY1 | 1.01634 | -1.66239 | 1.23E-11 | 4.11E-11 |
| KRT222 | -1.27335 | -3.25443 | 1.24E-11 | 4.13E-11 |
| DSG3 | 4.68383 | 1.932859 | 1.25E-11 | 4.15E-11 |
| DUSP23 | 1.055443 | 5.850664 | 1.25E-11 | 4.15E-11 |
| RNASE10 | 2.484095 | -2.4737 | 1.26E-11 | 4.20E-11 |
| PIM2 | 1.006734 | 6.28985 | 1.27E-11 | 4.21E-11 |
| VAX1 | 5.719909 | -1.98094 | 1.28E-11 | 4.25E-11 |
| SEMA3D | -1.19234 | 2.314165 | 1.29E-11 | 4.29E-11 |
| RHCG | 3.615473 | 1.665253 | 1.32E-11 | 4.37E-11 |
| SIM1 | 4.284632 | -1.3001 | 1.33E-11 | 4.40E-11 |
| CCDC146 | -1.03842 | 3.257891 | 1.33E-11 | 4.42E-11 |
| ASIC5 | 3.140982 | -3.10562 | 1.34E-11 | 4.46E-11 |
| ANKRD23 | 1.027433 | -0.11911 | 1.37E-11 | 4.54E-11 |
| C14orf39 | 2.568554 | -1.20322 | 1.39E-11 | 4.60E-11 |
| ADAM2 | 5.070498 | -1.80922 | 1.40E-11 | 4.64E-11 |
| CLNK | 1.334724 | 0.785311 | 1.42E-11 | 4.71E-11 |
| MMP7 | 2.054926 | 6.801474 | 1.45E-11 | 4.80E-11 |
| SUMO4 | 1.920427 | -1.90807 | 1.45E-11 | 4.81E-11 |
| KLC3 | 1.590206 | 2.012104 | 1.46E-11 | 4.82E-11 |
| HCAR2 | -1.30912 | 3.196448 | 1.48E-11 | 4.91E-11 |
| HCAR3 | -1.25343 | 0.156313 | 1.51E-11 | 4.98E-11 |
| LRRC70 | -1.01556 | -1.36593 | 1.51E-11 | 5.00E-11 |
| SERPINE2 | 1.572688 | 5.337155 | 1.53E-11 | 5.06E-11 |
| TREX2 | 1.16437 | -0.01879 | 1.54E-11 | 5.08E-11 |
| NR0B1 | 6.336261 | 2.487452 | 1.55E-11 | 5.11E-11 |
| BCAS1 | 2.28694 | 5.086902 | 1.55E-11 | 5.13E-11 |
| ZNF738 | 1.08782 | 3.024811 | 1.56E-11 | 5.14E-11 |
| RNF212 | 1.74888 | 3.676816 | 1.56E-11 | 5.15E-11 |
| SLCO6A1 | 4.472104 | -2.02404 | 1.57E-11 | 5.18E-11 |
| MSLNL | 3.042651 | 1.84245 | 1.60E-11 | 5.27E-11 |
| LHFPL4 | 3.53759 | 1.566488 | 1.63E-11 | 5.38E-11 |
| HYDIN | -1.61427 | 2.617575 | 1.79E-11 | 5.89E-11 |
| MSI1 | 2.346906 | 2.196785 | 1.84E-11 | 6.03E-11 |
| TDRD1 | 2.795786 | 1.340947 | 1.84E-11 | 6.05E-11 |
| RLN3 | 2.457007 | -1.98698 | 1.85E-11 | 6.07E-11 |
| TMPRSS6 | 2.339145 | 3.825343 | 1.86E-11 | 6.10E-11 |
| PROKR1 | 3.053378 | -1.50807 | 1.89E-11 | 6.18E-11 |
| TMEM236 | -1.11781 | 1.249431 | 1.90E-11 | 6.22E-11 |
| CCDC151 | -1.29682 | 1.443981 | 1.90E-11 | 6.23E-11 |
| SPDYC | 4.263119 | -0.37683 | 1.91E-11 | 6.26E-11 |
| UGT1A6 | 4.676656 | 1.820435 | 1.93E-11 | 6.32E-11 |
| SOX21 | 2.733041 | 2.316677 | 1.95E-11 | 6.37E-11 |
| PRSS56 | 5.542627 | -1.47026 | 1.99E-11 | 6.51E-11 |
| GJA3 | 2.490868 | -0.62509 | 1.99E-11 | 6.51E-11 |
| TRIM6 | 1.19326 | 2.812283 | 2.00E-11 | 6.53E-11 |
| PCDHGA1 | 1.423792 | 0.442901 | 2.01E-11 | 6.55E-11 |
| CHRNA4 | -1.82062 | -2.83717 | 2.03E-11 | 6.62E-11 |
| IL12RB2 | 1.632744 | 1.879256 | 2.04E-11 | 6.66E-11 |
| GABRR2 | 1.133493 | 0.339298 | 2.04E-11 | 6.66E-11 |
| CPZ | 1.422354 | -1.65915 | 2.08E-11 | 6.80E-11 |
| ECM1 | 1.667846 | 6.406783 | 2.09E-11 | 6.81E-11 |
| LGALS7B | 3.223676 | 0.353812 | 2.12E-11 | 6.90E-11 |
| CLEC4D | -1.19086 | -0.52064 | 2.14E-11 | 6.98E-11 |
| NDUFV2 | 1.640056 | 0.748346 | 2.16E-11 | 7.05E-11 |
| TMEM74 | 2.082752 | 0.010297 | 2.17E-11 | 7.07E-11 |
| TMEM179 | 4.022844 | 0.118113 | 2.22E-11 | 7.23E-11 |
| DSPP | 4.56549 | -2.72584 | 2.24E-11 | 7.27E-11 |
| SSC4D | 1.423184 | 1.586863 | 2.24E-11 | 7.28E-11 |
| SCG2 | 3.188524 | 4.502693 | 2.24E-11 | 7.28E-11 |
| WNT2 | -1.00515 | 3.53619 | 2.29E-11 | 7.43E-11 |
| PRB4 | 8.128797 | 0.006876 | 2.31E-11 | 7.50E-11 |
| CDH18 | 4.925172 | 0.203351 | 2.33E-11 | 7.58E-11 |
| OTOG | 3.665047 | -2.65485 | 2.38E-11 | 7.73E-11 |
| ADGRA1 | -1.98256 | -1.40444 | 2.40E-11 | 7.79E-11 |
| PPM1H | 1.095225 | 4.992918 | 2.42E-11 | 7.83E-11 |
| PSG6 | 6.142915 | -2.20896 | 2.44E-11 | 7.89E-11 |
| PAGE2 | 7.743977 | 1.636903 | 2.47E-11 | 8.00E-11 |
| CHRNB2 | 2.961652 | 0.385805 | 2.52E-11 | 8.16E-11 |
| C16orf74 | 1.734364 | 1.742773 | 2.53E-11 | 8.19E-11 |
| CFAP57 | -1.33461 | 2.429462 | 2.56E-11 | 8.27E-11 |
| COL18A1 | 1.039382 | 7.338862 | 2.58E-11 | 8.32E-11 |
| OTX2 | 6.386606 | -1.24879 | 2.58E-11 | 8.33E-11 |
| BHMT | 3.868575 | 0.92433 | 2.60E-11 | 8.40E-11 |
| RBM46 | 4.492436 | -0.76484 | 2.62E-11 | 8.45E-11 |
| CYP21A2 | 2.400715 | -0.46048 | 2.63E-11 | 8.49E-11 |
| GGH | 1.438803 | 4.951648 | 2.63E-11 | 8.49E-11 |
| CFAP91 | -1.36583 | 1.451233 | 2.64E-11 | 8.53E-11 |
| DNAAF1 | -1.49114 | 2.984732 | 2.65E-11 | 8.56E-11 |
| DPYSL5 | 5.719086 | 0.527728 | 2.70E-11 | 8.72E-11 |
| SLCO1B3-SLCO1B7 | 4.29743 | -3.47953 | 2.71E-11 | 8.75E-11 |
| WNT10A | 1.757968 | 2.652817 | 2.88E-11 | 9.28E-11 |
| OMP | 2.017186 | -2.92831 | 2.93E-11 | 9.42E-11 |
| TMEM200C | 1.478018 | 0.852191 | 2.94E-11 | 9.46E-11 |
| C1QL1 | 2.28636 | -0.49749 | 2.97E-11 | 9.56E-11 |
| KBTBD13 | -1.44191 | -3.71611 | 2.99E-11 | 9.61E-11 |
| BICDL2 | 1.055551 | 4.791286 | 3.00E-11 | 9.64E-11 |
| KCNV1 | 3.571215 | -0.81195 | 3.05E-11 | 9.78E-11 |
| C8G | 1.757476 | 0.322751 | 3.07E-11 | 9.87E-11 |
| SLC22A10 | -1.71671 | -2.95067 | 3.17E-11 | 1.02E-10 |
| GABRA5 | 4.667887 | -2.15418 | 3.27E-11 | 1.05E-10 |
| S100A7 | 5.364207 | 1.828262 | 3.37E-11 | 1.08E-10 |
| KYAT1 | 1.408779 | -2.19455 | 3.38E-11 | 1.08E-10 |
| SEPTIN3 | 1.563202 | 3.047671 | 3.38E-11 | 1.08E-10 |
| DLK1 | 7.091252 | 3.928045 | 3.41E-11 | 1.09E-10 |
| DYDC1 | -1.81104 | -2.65268 | 3.41E-11 | 1.09E-10 |
| PSG9 | 5.643889 | -2.36179 | 3.44E-11 | 1.10E-10 |
| SEC14L2 | 1.101998 | 3.182952 | 3.47E-11 | 1.11E-10 |
| PCDH8 | 5.423401 | 0.505666 | 3.51E-11 | 1.12E-10 |
| NELL2 | -1.10704 | 3.16976 | 3.55E-11 | 1.14E-10 |
| TMEM255A | -1.08431 | 2.091968 | 3.62E-11 | 1.16E-10 |
| MAGEA4 | 8.772609 | 3.704076 | 3.63E-11 | 1.16E-10 |
| SYNE4 | 1.015472 | 3.698403 | 3.63E-11 | 1.16E-10 |
| CKS2 | 1.075304 | 4.929089 | 3.65E-11 | 1.17E-10 |
| UCK2 | 1.13572 | 4.43186 | 3.67E-11 | 1.17E-10 |
| KCNN1 | 1.720704 | -0.6558 | 3.72E-11 | 1.19E-10 |
| MAEL | 3.697188 | 1.723678 | 3.77E-11 | 1.20E-10 |
| CLDN2 | 3.105003 | 5.844646 | 3.94E-11 | 1.25E-10 |
| PSG3 | 7.407442 | 0.179188 | 4.00E-11 | 1.27E-10 |
| ARG1 | -1.19935 | -1.46705 | 4.06E-11 | 1.29E-10 |
| ATP4B | 2.171678 | -1.27488 | 4.06E-11 | 1.29E-10 |
| WNK3 | 1.743655 | 1.67263 | 4.09E-11 | 1.30E-10 |
| PRDM9 | 5.515009 | -2.31632 | 4.52E-11 | 1.44E-10 |
| MS4A15 | -1.89796 | 4.996205 | 4.58E-11 | 1.45E-10 |
| PPT2-EGFL8 | 1.119757 | -1.81313 | 4.62E-11 | 1.46E-10 |
| TMEM158 | 1.490095 | 2.155491 | 4.64E-11 | 1.47E-10 |
| GC | 8.208632 | 1.274451 | 4.78E-11 | 1.51E-10 |
| KIF3C | 1.118349 | 4.424604 | 4.85E-11 | 1.53E-10 |
| OTOS | 5.392237 | -2.29843 | 4.91E-11 | 1.55E-10 |
| TWIST2 | -1.00444 | 1.576224 | 4.95E-11 | 1.57E-10 |
| GDPD2 | 2.583261 | -0.79652 | 5.07E-11 | 1.60E-10 |
| GAP43 | 2.304556 | -0.23935 | 5.11E-11 | 1.61E-10 |
| DCAF4L2 | 7.807317 | -0.31153 | 5.13E-11 | 1.62E-10 |
| OXCT2 | 1.504984 | -1.10385 | 5.18E-11 | 1.64E-10 |
| PDCL2 | 4.857564 | -2.12586 | 5.27E-11 | 1.67E-10 |
| CUZD1 | 2.09121 | -3.27527 | 5.28E-11 | 1.67E-10 |
| KRT6B | 4.025642 | 2.411352 | 5.28E-11 | 1.67E-10 |
| KBTBD12 | 2.081812 | 2.12652 | 5.33E-11 | 1.68E-10 |
| CYP4F11 | 2.977853 | 3.815819 | 5.38E-11 | 1.70E-10 |
| CD177 | 3.302695 | 3.56045 | 5.50E-11 | 1.73E-10 |
| ENO4 | -1.19587 | -0.85235 | 5.51E-11 | 1.74E-10 |
| LRRIQ1 | -1.39913 | 2.362634 | 5.51E-11 | 1.74E-10 |
| BEST4 | 1.261497 | 0.626295 | 5.55E-11 | 1.75E-10 |
| TCF24 | 2.453049 | -1.01232 | 5.68E-11 | 1.79E-10 |
| EFR3B | -1.08956 | 3.598637 | 5.85E-11 | 1.84E-10 |
| CSAG3 | 5.14268 | -0.63355 | 5.91E-11 | 1.86E-10 |
| ZPBP2 | 4.100743 | -1.90296 | 5.91E-11 | 1.86E-10 |
| FGF20 | 2.531944 | -1.48889 | 5.99E-11 | 1.88E-10 |
| LFNG | 1.122804 | 6.091962 | 5.99E-11 | 1.88E-10 |
| TMEM229A | 4.57447 | 0.672032 | 5.99E-11 | 1.88E-10 |
| SLC22A8 | -2.09312 | -3.70967 | 6.02E-11 | 1.89E-10 |
| PKD2L1 | -1.16676 | 0.465655 | 6.05E-11 | 1.90E-10 |
| KIR3DL1 | -1.67537 | -1.71303 | 6.34E-11 | 1.99E-10 |
| IGFBP1 | 4.299188 | 2.199995 | 6.38E-11 | 2.00E-10 |
| FGA | 3.913684 | 8.645131 | 6.54E-11 | 2.05E-10 |
| PRLH | -1.87296 | -3.86136 | 6.56E-11 | 2.05E-10 |
| ASPH | 1.206035 | 8.847774 | 6.59E-11 | 2.06E-10 |
| DKK4 | 5.949847 | 0.946569 | 6.59E-11 | 2.06E-10 |
| ESYT3 | -1.04687 | 4.594952 | 6.65E-11 | 2.08E-10 |
| LRRC66 | 2.373841 | 0.549982 | 6.70E-11 | 2.09E-10 |
| MC5R | 2.87354 | -2.1759 | 6.74E-11 | 2.11E-10 |
| ATP6V0D2 | -1.31748 | 1.76328 | 6.79E-11 | 2.12E-10 |
| OASL | -1.02091 | 4.153654 | 6.86E-11 | 2.14E-10 |
| HEPACAM2 | 3.715387 | 2.106858 | 7.30E-11 | 2.28E-10 |
| NKX6-1 | 2.371782 | -1.33525 | 7.60E-11 | 2.37E-10 |
| SPATC1L | 1.086183 | 3.075391 | 7.63E-11 | 2.37E-10 |
| RAPGEFL1 | 1.177136 | 4.025294 | 7.67E-11 | 2.39E-10 |
| HOXD3 | 1.901511 | 0.186869 | 7.68E-11 | 2.39E-10 |
| MYT1 | 2.955554 | 1.329086 | 7.72E-11 | 2.40E-10 |
| TMEM132E | 1.545691 | 0.029773 | 7.76E-11 | 2.41E-10 |
| GABRP | 3.168675 | 4.051492 | 8.17E-11 | 2.54E-10 |
| GSR | 1.014737 | 7.118193 | 8.26E-11 | 2.57E-10 |
| STRA8 | 4.94593 | -1.32975 | 8.28E-11 | 2.57E-10 |
| SLC35F4 | 3.125538 | -2.54059 | 8.39E-11 | 2.60E-10 |
| IFITM1 | 1.140172 | 6.196944 | 8.39E-11 | 2.60E-10 |
| DLX4 | 1.236895 | 1.937296 | 8.66E-11 | 2.69E-10 |
| SLC2A2 | 6.271446 | -0.7796 | 8.67E-11 | 2.69E-10 |
| KLHL35 | 1.338366 | 2.676809 | 8.69E-11 | 2.70E-10 |
| MUC17 | 7.84751 | 1.277324 | 8.75E-11 | 2.71E-10 |
| NRGN | -1.2581 | 5.114057 | 8.83E-11 | 2.73E-10 |
| PLEKHG2 | 1.02717 | 6.105304 | 8.87E-11 | 2.75E-10 |
| MGST1 | 1.00908 | 8.362809 | 9.04E-11 | 2.80E-10 |
| LDHB | 1.035952 | 4.090003 | 9.09E-11 | 2.81E-10 |
| TNC | 1.588999 | 8.43131 | 9.17E-11 | 2.84E-10 |
| APOBEC4 | -1.83344 | 0.589971 | 9.44E-11 | 2.92E-10 |
| FGF21 | 4.649146 | -3.04656 | 9.53E-11 | 2.95E-10 |
| CIART | 1.175984 | 2.928657 | 9.54E-11 | 2.95E-10 |
| PAGE5 | 5.283261 | 0.057289 | 9.57E-11 | 2.96E-10 |
| FHAD1 | -1.091 | 2.847235 | 9.66E-11 | 2.98E-10 |
| ADGRF5 | -1.06044 | 8.242642 | 9.68E-11 | 2.99E-10 |
| PYDC1 | 4.186591 | -2.29332 | 9.84E-11 | 3.04E-10 |
| NEFH | 2.548093 | 3.007047 | 9.95E-11 | 3.07E-10 |
| GCNT4 | -1.07251 | 2.302049 | 1.02E-10 | 3.14E-10 |
| OVOL3 | 1.704851 | -2.04351 | 1.04E-10 | 3.19E-10 |
| MAGEB1 | 6.428008 | -1.75687 | 1.04E-10 | 3.22E-10 |
| H2BC21 | 1.151144 | 5.13537 | 1.05E-10 | 3.24E-10 |
| CYSRT1 | 1.418596 | 1.174136 | 1.06E-10 | 3.25E-10 |
| MSTN | 3.713532 | 1.479902 | 1.06E-10 | 3.25E-10 |
| UGT1A1 | 3.858273 | 0.224436 | 1.07E-10 | 3.28E-10 |
| HACD1 | -1.03551 | 2.889088 | 1.07E-10 | 3.30E-10 |
| SOX14 | 6.208412 | 0.825783 | 1.08E-10 | 3.33E-10 |
| CFHR4 | 3.833371 | -3.19786 | 1.10E-10 | 3.36E-10 |
| FAM181A | -1.78706 | 0.221188 | 1.10E-10 | 3.37E-10 |
| HABP2 | 2.258604 | 4.552377 | 1.10E-10 | 3.39E-10 |
| VIT | -1.63643 | -1.26507 | 1.11E-10 | 3.41E-10 |
| SEPTIN12 | 2.878955 | -3.72573 | 1.16E-10 | 3.55E-10 |
| TAS2R38 | 4.250527 | -3.13319 | 1.16E-10 | 3.56E-10 |
| ZNF793 | 1.059117 | 2.952974 | 1.17E-10 | 3.59E-10 |
| SH2D5 | 2.334142 | -0.61241 | 1.20E-10 | 3.66E-10 |
| CCL16 | -1.25824 | -2.63815 | 1.22E-10 | 3.72E-10 |
| PABPC3 | 1.235671 | 0.173068 | 1.24E-10 | 3.79E-10 |
| HOXD11 | 4.919737 | -2.35562 | 1.25E-10 | 3.82E-10 |
| WDR72 | 2.603032 | 3.911391 | 1.28E-10 | 3.90E-10 |
| CHST4 | 2.30538 | 1.319675 | 1.29E-10 | 3.93E-10 |
| BX276092.9 | 4.902664 | -1.24544 | 1.30E-10 | 3.96E-10 |
| S100A5 | 1.923205 | 0.062386 | 1.30E-10 | 3.97E-10 |
| ZIC4 | 5.22224 | -0.89784 | 1.31E-10 | 3.99E-10 |
| KRT14 | 4.056124 | 3.644758 | 1.31E-10 | 3.99E-10 |
| RASSF6 | 1.328946 | 4.081171 | 1.31E-10 | 3.99E-10 |
| SST | 7.398328 | 3.7118 | 1.33E-10 | 4.04E-10 |
| MAJIN | 2.607838 | -0.19843 | 1.34E-10 | 4.07E-10 |
| SERPINA5 | 2.409967 | 1.958856 | 1.34E-10 | 4.07E-10 |
| MAGED4 | 3.158931 | -3.17238 | 1.35E-10 | 4.09E-10 |
| PATE4 | 3.461683 | -3.38365 | 1.37E-10 | 4.15E-10 |
| RGS7 | 2.987418 | -0.1786 | 1.39E-10 | 4.22E-10 |
| DPP10 | 2.459773 | 2.121949 | 1.42E-10 | 4.32E-10 |
| MAP3K19 | -1.58569 | 1.585575 | 1.44E-10 | 4.38E-10 |
| PSG4 | 7.584334 | 1.39748 | 1.45E-10 | 4.38E-10 |
| DDX53 | 5.15014 | -1.60858 | 1.46E-10 | 4.43E-10 |
| LRRC69 | 1.02932 | 0.041068 | 1.47E-10 | 4.45E-10 |
| LAG3 | 1.302076 | 3.21469 | 1.48E-10 | 4.48E-10 |
| VCX | 4.249191 | -1.41302 | 1.48E-10 | 4.49E-10 |
| GCG | 8.125482 | 1.259591 | 1.49E-10 | 4.50E-10 |
| VAX2 | 1.481266 | 0.286691 | 1.52E-10 | 4.61E-10 |
| AMER2 | -1.90096 | -2.41205 | 1.53E-10 | 4.62E-10 |
| SKOR2 | 5.39125 | -2.36741 | 1.53E-10 | 4.63E-10 |
| H2BC1 | 4.7864 | -3.09494 | 1.54E-10 | 4.65E-10 |
| PRAC2 | 4.110608 | -3.16351 | 1.55E-10 | 4.70E-10 |
| APOA2 | 4.535524 | -0.07253 | 1.56E-10 | 4.71E-10 |
| TULP1 | 1.554121 | -1.77768 | 1.56E-10 | 4.72E-10 |
| KLK8 | 4.717504 | 0.216049 | 1.57E-10 | 4.73E-10 |
| RBFOX1 | 3.927556 | 0.026389 | 1.58E-10 | 4.77E-10 |
| ATP13A4 | -1.31823 | 6.411401 | 1.65E-10 | 4.99E-10 |
| SLC22A11 | 2.540816 | -1.93416 | 1.66E-10 | 5.01E-10 |
| SYCE1L | 1.157596 | 1.012858 | 1.72E-10 | 5.17E-10 |
| HTR3B | 4.733045 | -0.22707 | 1.73E-10 | 5.19E-10 |
| ZNF300 | 1.234225 | 2.666683 | 1.73E-10 | 5.21E-10 |
| P2RY4 | 2.402085 | -1.51306 | 1.74E-10 | 5.22E-10 |
| G6PD | 1.355093 | 7.47063 | 1.76E-10 | 5.28E-10 |
| MYO18B | 3.167942 | -0.07368 | 1.76E-10 | 5.28E-10 |
| TCEAL6 | -1.4813 | -3.64882 | 1.79E-10 | 5.37E-10 |
| BOLL | 2.862923 | -2.52201 | 1.85E-10 | 5.56E-10 |
| SPACA4 | 1.244297 | 0.235577 | 1.85E-10 | 5.56E-10 |
| RASL10B | 1.63648 | 1.969336 | 1.86E-10 | 5.57E-10 |
| PRH2 | 2.177562 | -0.31778 | 1.86E-10 | 5.58E-10 |
| SSTR5 | 3.882704 | -2.34756 | 1.87E-10 | 5.60E-10 |
| TBX18 | 2.707139 | 1.717265 | 1.88E-10 | 5.64E-10 |
| HLA-DRB5 | -1.09957 | 8.673753 | 1.89E-10 | 5.66E-10 |
| SDCBP2 | 1.633433 | 4.431835 | 1.90E-10 | 5.69E-10 |
| LIPI | 2.062036 | -2.93841 | 1.93E-10 | 5.77E-10 |
| ALDH1L2 | 1.202837 | 3.903407 | 1.95E-10 | 5.85E-10 |
| HMX2 | 4.496201 | -2.50228 | 1.96E-10 | 5.88E-10 |
| POF1B | 1.872408 | 4.025534 | 1.99E-10 | 5.97E-10 |
| CARD18 | 4.955719 | -1.9969 | 2.00E-10 | 5.99E-10 |
| CALML3 | 4.401551 | -2.53758 | 2.01E-10 | 6.00E-10 |
| VCX3A | 5.598254 | -1.47789 | 2.05E-10 | 6.12E-10 |
| LYPD6B | 2.083966 | 2.923634 | 2.11E-10 | 6.30E-10 |
| ISL2 | 1.846087 | -1.70292 | 2.12E-10 | 6.33E-10 |
| TMEM178A | -1.19603 | 1.99555 | 2.13E-10 | 6.35E-10 |
| SYT5 | 2.648596 | 0.624488 | 2.13E-10 | 6.36E-10 |
| ITGA10 | -1.00278 | 2.487109 | 2.13E-10 | 6.36E-10 |
| SULT1C2 | 1.72592 | 4.483945 | 2.17E-10 | 6.48E-10 |
| H4C13 | 6.754819 | -1.28478 | 2.21E-10 | 6.59E-10 |
| GALNT4 | 1.553487 | -1.4318 | 2.23E-10 | 6.63E-10 |
| AC008397.2 | -1.30761 | -1.7467 | 2.27E-10 | 6.76E-10 |
| ERVMER34-1 | 1.691352 | 2.495514 | 2.28E-10 | 6.78E-10 |
| GCLM | 1.077651 | 5.906572 | 2.30E-10 | 6.83E-10 |
| CCDC194 | 1.815998 | -1.7983 | 2.30E-10 | 6.85E-10 |
| NKG7 | -1.0452 | 3.849862 | 2.33E-10 | 6.93E-10 |
| SPINT4 | 4.250534 | -2.3475 | 2.39E-10 | 7.10E-10 |
| CCDC87 | 1.052871 | -0.02718 | 2.46E-10 | 7.32E-10 |
| STPG4 | 2.28739 | -1.63819 | 2.48E-10 | 7.37E-10 |
| AC068580.4 | 1.400392 | 0.290147 | 2.49E-10 | 7.39E-10 |
| CPEB1 | -1.10623 | -0.10712 | 2.49E-10 | 7.39E-10 |
| DLX2 | 3.197755 | -2.58139 | 2.52E-10 | 7.46E-10 |
| TTLL8 | 3.352772 | -3.34561 | 2.52E-10 | 7.46E-10 |
| CARMIL3 | 1.400071 | 1.344222 | 2.52E-10 | 7.46E-10 |
| ELOVL6 | 1.310182 | 4.377294 | 2.55E-10 | 7.55E-10 |
| HOXB3 | 1.394271 | 4.025108 | 2.57E-10 | 7.61E-10 |
| CPA5 | 2.131072 | -1.59844 | 2.57E-10 | 7.61E-10 |
| CRACR2B | 1.098526 | 5.096635 | 2.61E-10 | 7.73E-10 |
| ATP4A | 4.030365 | -1.8947 | 2.62E-10 | 7.76E-10 |
| NAA11 | 5.458433 | -0.90282 | 2.64E-10 | 7.83E-10 |
| ST18 | 2.283421 | 0.771231 | 2.65E-10 | 7.83E-10 |
| GNRHR | 2.248338 | -0.67741 | 2.67E-10 | 7.90E-10 |
| MYBPC2 | 1.573457 | 0.864018 | 2.68E-10 | 7.92E-10 |
| C10orf105 | -1.32767 | -2.68703 | 2.73E-10 | 8.08E-10 |
| NEUROD1 | 6.684126 | 1.9603 | 2.74E-10 | 8.10E-10 |
| PBLD | 1.108541 | 3.84066 | 2.82E-10 | 8.34E-10 |
| GRIA4 | 2.408937 | -0.5275 | 2.83E-10 | 8.37E-10 |
| FRMPD4 | -1.68543 | -2.33435 | 2.88E-10 | 8.51E-10 |
| H1-6 | 2.471874 | -3.25034 | 2.97E-10 | 8.76E-10 |
| GAGE2A | 6.946467 | -1.50444 | 2.97E-10 | 8.78E-10 |
| TTC24 | 1.565241 | -0.86475 | 3.01E-10 | 8.89E-10 |
| BOLA2B | 1.050382 | -0.63809 | 3.02E-10 | 8.90E-10 |
| POU1F1 | -1.19072 | -3.02078 | 3.05E-10 | 9.00E-10 |
| FRMPD1 | -1.41305 | -1.39951 | 3.06E-10 | 9.03E-10 |
| ACSM5 | -1.10202 | 0.15951 | 3.12E-10 | 9.20E-10 |
| SLC6A15 | 3.989001 | 0.776189 | 3.19E-10 | 9.38E-10 |
| SPANXC | 5.512592 | -2.71299 | 3.24E-10 | 9.53E-10 |
| NIPAL1 | 1.108474 | 2.601274 | 3.31E-10 | 9.75E-10 |
| HOXB2 | 1.629703 | 3.517181 | 3.35E-10 | 9.83E-10 |
| NLRP7 | 2.002425 | -0.45901 | 3.39E-10 | 9.95E-10 |
| MAPK8IP2 | 1.46829 | 3.406826 | 3.39E-10 | 9.96E-10 |
| AC005726.1 | 5.141834 | -1.97875 | 3.39E-10 | 9.96E-10 |
| SLC26A3 | -1.58742 | -2.80619 | 3.41E-10 | 1.00E-09 |
| NTS | 5.040179 | 6.387964 | 3.44E-10 | 1.01E-09 |
| DOK7 | -1.09193 | 1.940446 | 3.46E-10 | 1.02E-09 |
| FAM71F1 | 2.40127 | -3.12979 | 3.52E-10 | 1.03E-09 |
| SLC9A2 | 2.374298 | 1.764233 | 3.54E-10 | 1.04E-09 |
| POU5F2 | 3.340134 | 0.167242 | 3.57E-10 | 1.05E-09 |
| SCN3B | -1.02449 | 0.409562 | 3.60E-10 | 1.06E-09 |
| SLC34A3 | 1.77195 | -0.36753 | 3.65E-10 | 1.07E-09 |
| HTR2B | 1.957419 | 1.364323 | 3.69E-10 | 1.08E-09 |
| HES7 | 1.973926 | -1.79763 | 3.70E-10 | 1.08E-09 |
| KCNH8 | 2.068846 | 0.538373 | 3.72E-10 | 1.09E-09 |
| CMBL | 1.365932 | 5.999452 | 3.74E-10 | 1.09E-09 |
| FMO1 | 1.316193 | 1.850699 | 3.79E-10 | 1.11E-09 |
| CDCP1 | 1.001399 | 6.401934 | 3.84E-10 | 1.12E-09 |
| P2RY12 | -1.0984 | 1.044313 | 3.88E-10 | 1.13E-09 |
| SPRR3 | 4.595981 | 1.693021 | 3.94E-10 | 1.15E-09 |
| CYP2B6 | 3.949169 | 0.702749 | 4.01E-10 | 1.17E-09 |
| CYP4F3 | 3.037748 | 3.642805 | 4.12E-10 | 1.20E-09 |
| IQCM | 3.553059 | -3.38733 | 4.14E-10 | 1.21E-09 |
| STXBP5L | 3.685809 | -0.08625 | 4.16E-10 | 1.21E-09 |
| KCNRG | -1.19503 | -0.76421 | 4.25E-10 | 1.24E-09 |
| CFAP299 | -1.63315 | -0.63738 | 4.29E-10 | 1.25E-09 |
| NKX2-4 | 5.46007 | -1.7365 | 4.45E-10 | 1.29E-09 |
| TTPA | -1.47789 | -0.64419 | 4.51E-10 | 1.31E-09 |
| KHDC1L | 3.545213 | -3.49711 | 4.56E-10 | 1.32E-09 |
| CCR3 | 1.422503 | 0.154915 | 4.56E-10 | 1.32E-09 |
| NLRP14 | -1.09463 | -2.31706 | 4.60E-10 | 1.33E-09 |
| ZNF716 | 4.993647 | -1.75752 | 4.64E-10 | 1.34E-09 |
| GSC | 2.572027 | -1.19615 | 4.72E-10 | 1.37E-09 |
| PSG5 | 7.304485 | 0.494045 | 4.75E-10 | 1.37E-09 |
| TGFB2 | -1.04097 | 4.121264 | 4.86E-10 | 1.41E-09 |
| CCDC60 | -1.60945 | 0.778245 | 4.89E-10 | 1.41E-09 |
| CHRDL2 | 2.005452 | 2.790144 | 4.96E-10 | 1.44E-09 |
| RRAD | -1.18297 | 5.119744 | 5.00E-10 | 1.44E-09 |
| LMNTD1 | -1.81773 | -1.32141 | 5.02E-10 | 1.45E-09 |
| GJB4 | 2.892763 | -0.58625 | 5.05E-10 | 1.46E-09 |
| S100A4 | -1.04556 | 7.877805 | 5.07E-10 | 1.46E-09 |
| RNF39 | 1.225477 | 3.187514 | 5.07E-10 | 1.46E-09 |
| RASD1 | 1.688713 | 6.667181 | 5.09E-10 | 1.47E-09 |
| AKR1C3 | 2.148529 | 7.532466 | 5.20E-10 | 1.50E-09 |
| IBSP | 2.581767 | 1.269331 | 5.29E-10 | 1.52E-09 |
| UGT1A8 | 6.526366 | -1.28715 | 5.29E-10 | 1.53E-09 |
| LDLRAD1 | -1.49991 | 3.191778 | 5.33E-10 | 1.54E-09 |
| SCIN | 1.56889 | 5.602286 | 5.33E-10 | 1.54E-09 |
| P2RX5 | 1.301745 | 1.14984 | 5.35E-10 | 1.54E-09 |
| ZIC3 | 5.583797 | -1.48114 | 5.35E-10 | 1.54E-09 |
| AC013477.1 | 2.348012 | -3.00826 | 5.35E-10 | 1.54E-09 |
| SLAMF7 | 1.180432 | 5.67478 | 5.35E-10 | 1.54E-09 |
| TMC1 | 1.540707 | -0.67375 | 5.42E-10 | 1.56E-09 |
| NMBR | -1.28371 | -3.3515 | 5.51E-10 | 1.58E-09 |
| BGLAP | 1.424972 | -1.33255 | 5.52E-10 | 1.59E-09 |
| IL21 | 1.840454 | -1.32173 | 5.55E-10 | 1.59E-09 |
| ADAMTS18 | 1.774546 | 0.011578 | 5.58E-10 | 1.60E-09 |
| VSIG2 | -1.34931 | 5.096212 | 5.62E-10 | 1.62E-09 |
| TRPM5 | 2.502293 | -0.58709 | 5.68E-10 | 1.63E-09 |
| NPAS3 | 2.426359 | 2.390972 | 5.69E-10 | 1.63E-09 |
| GH2 | 4.594396 | -3.16326 | 5.69E-10 | 1.63E-09 |
| ZIC1 | 4.808466 | 0.649189 | 5.70E-10 | 1.64E-09 |
| PRDM7 | 2.373678 | -3.31625 | 5.71E-10 | 1.64E-09 |
| UGT2B10 | 3.926757 | -3.45644 | 5.81E-10 | 1.67E-09 |
| NEFL | 3.163779 | 1.316169 | 5.83E-10 | 1.67E-09 |
| ISX | 5.236955 | -0.18795 | 5.85E-10 | 1.68E-09 |
| GABRG3 | 3.612082 | -0.10223 | 5.87E-10 | 1.68E-09 |
| AOX1 | -1.18493 | 3.839147 | 5.87E-10 | 1.68E-09 |
| ZFHX4 | 1.782148 | 2.077713 | 6.00E-10 | 1.72E-09 |
| MYRIP | -1.15695 | 1.712995 | 6.10E-10 | 1.75E-09 |
| ATOH1 | 5.557896 | -2.31678 | 6.17E-10 | 1.77E-09 |
| GDF15 | 1.475529 | 6.569851 | 6.33E-10 | 1.81E-09 |
| CCL18 | -1.18263 | 7.103017 | 6.50E-10 | 1.86E-09 |
| H2AC18 | 2.744994 | -2.61207 | 6.57E-10 | 1.88E-09 |
| PRR32 | 3.072056 | -2.0747 | 6.60E-10 | 1.89E-09 |
| GGTLC2 | -1.45383 | -1.47107 | 6.67E-10 | 1.91E-09 |
| ZNF732 | 1.95628 | -0.83166 | 6.83E-10 | 1.95E-09 |
| DPEP1 | 1.764535 | 1.852305 | 6.88E-10 | 1.96E-09 |
| LRRC38 | 4.886746 | 0.923488 | 6.93E-10 | 1.98E-09 |
| OPCML | 1.715171 | -0.85038 | 7.00E-10 | 2.00E-09 |
| POM121L2 | 2.412901 | -2.6598 | 7.08E-10 | 2.02E-09 |
| CSF3R | -1.07057 | 6.243407 | 7.11E-10 | 2.03E-09 |
| DNAH12 | -1.51866 | 2.448582 | 7.15E-10 | 2.04E-09 |
| CEACAM6 | 1.432044 | 10.71688 | 7.26E-10 | 2.07E-09 |
| SLITRK1 | 4.844846 | -1.78533 | 7.29E-10 | 2.08E-09 |
| PRKAA2 | 1.240859 | 3.901617 | 7.31E-10 | 2.08E-09 |
| RFX6 | 4.668618 | -0.39361 | 7.40E-10 | 2.11E-09 |
| LHCGR | 2.752035 | -1.38445 | 7.43E-10 | 2.12E-09 |
| SLCO4C1 | -1.17826 | 4.541355 | 7.53E-10 | 2.14E-09 |
| CHRD | 1.405058 | 3.786753 | 7.76E-10 | 2.21E-09 |
| DOK6 | -1.03396 | 2.450062 | 7.82E-10 | 2.22E-09 |
| LRRC10B | -1.3501 | 2.703382 | 7.84E-10 | 2.23E-09 |
| PCDHA5 | 1.679061 | -0.85335 | 7.86E-10 | 2.23E-09 |
| CFAP74 | -1.44035 | 1.902767 | 7.98E-10 | 2.27E-09 |
| SPANXB1 | 6.408687 | -0.18563 | 8.05E-10 | 2.29E-09 |
| NEK10 | -1.24327 | 1.540501 | 8.06E-10 | 2.29E-09 |
| ADGRD2 | 2.431801 | -3.2679 | 8.28E-10 | 2.35E-09 |
| CCDC74B | -1.17603 | 0.774521 | 8.35E-10 | 2.37E-09 |
| CRACR2A | 1.093879 | 3.137562 | 8.53E-10 | 2.42E-09 |
| STMND1 | -1.5123 | 1.3863 | 8.62E-10 | 2.44E-09 |
| CAMK2N1 | -1.00668 | 5.580946 | 8.66E-10 | 2.45E-09 |
| IZUMO4 | 1.148113 | 1.689586 | 8.68E-10 | 2.46E-09 |
| PI3 | 2.981267 | 3.991168 | 8.71E-10 | 2.47E-09 |
| MAGED4B | 2.631157 | -2.91941 | 8.89E-10 | 2.52E-09 |
| SLC9A5 | 1.018771 | 2.360936 | 8.94E-10 | 2.53E-09 |
| FAM163A | 2.306217 | -0.55868 | 8.98E-10 | 2.54E-09 |
| TEX13C | 6.153461 | -0.0796 | 9.04E-10 | 2.55E-09 |
| FER1L6 | 3.823278 | 2.829856 | 9.15E-10 | 2.59E-09 |
| PRIMA1 | -1.47844 | 0.101121 | 9.35E-10 | 2.64E-09 |
| CAPN8 | 1.422223 | 6.675067 | 9.48E-10 | 2.67E-09 |
| CDH2 | 2.008135 | 2.961726 | 9.56E-10 | 2.70E-09 |
| PPP1R3G | 1.131948 | 1.515002 | 9.63E-10 | 2.71E-09 |
| PDPN | -1.0256 | 5.444531 | 9.65E-10 | 2.72E-09 |
| OR1F1 | 3.653472 | -3.55518 | 9.78E-10 | 2.75E-09 |
| DDIT4 | 1.192455 | 5.995224 | 9.87E-10 | 2.78E-09 |
| ADARB2 | -1.23586 | 0.283874 | 1.00E-09 | 2.82E-09 |
| GNRH2 | 2.850712 | -0.64151 | 1.00E-09 | 2.82E-09 |
| HTR6 | 1.573254 | -1.64925 | 1.00E-09 | 2.82E-09 |
| ATP6V0A4 | 2.066252 | 3.196093 | 1.01E-09 | 2.83E-09 |
| LRFN2 | 3.036638 | -1.1071 | 1.01E-09 | 2.83E-09 |
| CHRND | 2.803263 | -2.61128 | 1.02E-09 | 2.86E-09 |
| GABRR1 | 3.50171 | -0.74016 | 1.02E-09 | 2.86E-09 |
| CGB7 | 1.714525 | -2.08935 | 1.02E-09 | 2.88E-09 |
| KCNJ13 | 3.959777 | -1.08978 | 1.05E-09 | 2.94E-09 |
| EPHB1 | 1.585181 | 1.963491 | 1.07E-09 | 3.01E-09 |
| SCN3A | 2.784043 | 2.695037 | 1.08E-09 | 3.04E-09 |
| TMEM61 | 1.365243 | 0.553758 | 1.09E-09 | 3.07E-09 |
| CD79A | 1.505186 | 5.05632 | 1.11E-09 | 3.11E-09 |
| PON1 | 1.737885 | 1.097967 | 1.11E-09 | 3.11E-09 |
| UGT1A7 | 4.31147 | -2.10486 | 1.13E-09 | 3.15E-09 |
| PCSK9 | -1.4515 | 4.237365 | 1.13E-09 | 3.16E-09 |
| DRC7 | -1.45415 | 1.202834 | 1.14E-09 | 3.18E-09 |
| THBS4 | 2.308246 | 3.702029 | 1.15E-09 | 3.23E-09 |
| SCN5A | 1.912892 | 0.003669 | 1.16E-09 | 3.25E-09 |
| CIDEC | 3.25594 | -0.23127 | 1.17E-09 | 3.28E-09 |
| SPANXD | 5.425731 | -2.77388 | 1.18E-09 | 3.29E-09 |
| HSPB9 | 1.521679 | -0.98635 | 1.19E-09 | 3.34E-09 |
| SLC38A4 | 2.001324 | 1.793137 | 1.20E-09 | 3.34E-09 |
| GRAPL | -1.22085 | -3.81472 | 1.21E-09 | 3.36E-09 |
| TEX15 | 3.374598 | -0.03247 | 1.21E-09 | 3.38E-09 |
| CYP26A1 | 2.758295 | -1.30729 | 1.22E-09 | 3.40E-09 |
| TRPC7 | 3.147857 | -3.88774 | 1.22E-09 | 3.40E-09 |
| CCL7 | 1.890231 | 0.25835 | 1.25E-09 | 3.48E-09 |
| OSR2 | 1.28924 | 2.491225 | 1.26E-09 | 3.51E-09 |
| KCNJ6 | 2.376177 | 0.425323 | 1.27E-09 | 3.53E-09 |
| PPP4R3C | 5.692322 | -2.33365 | 1.28E-09 | 3.56E-09 |
| HS3ST3A1 | 1.397589 | 1.248535 | 1.29E-09 | 3.60E-09 |
| IFNE | 2.930425 | -1.54373 | 1.33E-09 | 3.70E-09 |
| ST20 | 1.091418 | 0.194368 | 1.35E-09 | 3.75E-09 |
| PAGE2B | 5.061979 | -0.40312 | 1.36E-09 | 3.77E-09 |
| PLA2G4D | 1.507571 | 0.307934 | 1.36E-09 | 3.78E-09 |
| TSPAN8 | 2.15491 | 6.676492 | 1.37E-09 | 3.79E-09 |
| SPDYA | 1.298727 | -0.27085 | 1.38E-09 | 3.82E-09 |
| MSX2 | 1.413269 | 1.297539 | 1.41E-09 | 3.91E-09 |
| EDN2 | 1.898579 | 2.899147 | 1.43E-09 | 3.96E-09 |
| ARG2 | 1.124345 | 2.426517 | 1.46E-09 | 4.03E-09 |
| ZNF714 | 1.041754 | 3.795351 | 1.49E-09 | 4.12E-09 |
| ZNF710 | 1.034391 | 5.766749 | 1.52E-09 | 4.20E-09 |
| TGIF2LX | 4.616261 | -3.24927 | 1.53E-09 | 4.24E-09 |
| GJB5 | 2.37549 | 1.496386 | 1.55E-09 | 4.27E-09 |
| CTLA4 | 1.062288 | 2.2019 | 1.55E-09 | 4.28E-09 |
| PSG11 | 6.855922 | -1.59192 | 1.55E-09 | 4.29E-09 |
| MFSD4A | 1.546112 | 5.570893 | 1.61E-09 | 4.44E-09 |
| FSTL5 | 4.52387 | 0.243593 | 1.62E-09 | 4.46E-09 |
| GLS2 | 1.008407 | -1.67178 | 1.62E-09 | 4.46E-09 |
| IFNL2 | 3.011645 | -3.81118 | 1.64E-09 | 4.52E-09 |
| CYP2E1 | 1.510387 | 1.27373 | 1.69E-09 | 4.66E-09 |
| KANK4 | -1.24679 | 2.553674 | 1.70E-09 | 4.67E-09 |
| CHL1 | 1.575404 | 5.217332 | 1.70E-09 | 4.67E-09 |
| MEOX1 | -1.15458 | 0.686862 | 1.70E-09 | 4.68E-09 |
| ALPL | -1.24154 | 7.195157 | 1.73E-09 | 4.77E-09 |
| AC000093.1 | 1.5663 | -1.62903 | 1.74E-09 | 4.79E-09 |
| REC114 | 2.128013 | -2.7076 | 1.76E-09 | 4.85E-09 |
| TBCE | 1.036079 | 0.756024 | 1.77E-09 | 4.85E-09 |
| STUM | 2.441984 | 3.279491 | 1.77E-09 | 4.85E-09 |
| SPAG6 | -1.57481 | 3.244599 | 1.79E-09 | 4.92E-09 |
| SSX1 | 6.530187 | -0.1589 | 1.80E-09 | 4.94E-09 |
| APOB | 3.183186 | 2.019322 | 1.81E-09 | 4.96E-09 |
| PATE2 | 2.671106 | -3.60936 | 1.81E-09 | 4.97E-09 |
| RUNDC3B | -1.05651 | 0.310252 | 1.82E-09 | 4.99E-09 |
| CCDC166 | 2.974828 | -3.7563 | 1.82E-09 | 5.00E-09 |
| TEX101 | 3.599926 | -0.64104 | 1.83E-09 | 5.01E-09 |
| FAM186A | 1.164425 | -0.66386 | 1.83E-09 | 5.02E-09 |
| TUBA3E | 3.836474 | -1.55391 | 1.86E-09 | 5.11E-09 |
| DNAH6 | -1.25018 | 2.452788 | 1.87E-09 | 5.12E-09 |
| FAT2 | 2.142633 | 2.558994 | 1.91E-09 | 5.24E-09 |
| CCDC17 | -1.29154 | 2.937976 | 1.92E-09 | 5.24E-09 |
| CHKB | 1.017862 | -0.78877 | 1.94E-09 | 5.30E-09 |
| ADAM11 | 1.297739 | -0.39272 | 1.96E-09 | 5.36E-09 |
| SHISAL2B | 3.351244 | -1.57052 | 1.97E-09 | 5.39E-09 |
| CEND1 | 1.500849 | -1.30352 | 1.97E-09 | 5.39E-09 |
| FOXG1 | 4.827629 | -1.18694 | 1.98E-09 | 5.40E-09 |
| NOS1 | -1.72616 | 2.268552 | 2.00E-09 | 5.47E-09 |
| NCR1 | -1.06399 | -1.09533 | 2.02E-09 | 5.51E-09 |
| ACAN | 1.467873 | 2.018345 | 2.03E-09 | 5.54E-09 |
| INSYN2B | 1.925156 | 0.441013 | 2.05E-09 | 5.60E-09 |
| KCNC1 | 2.119716 | -1.06928 | 2.08E-09 | 5.68E-09 |
| PLAT | 1.66347 | 7.414729 | 2.13E-09 | 5.80E-09 |
| GTF2H4 | 1.187924 | -2.43088 | 2.17E-09 | 5.90E-09 |
| APCS | 5.22774 | -2.9116 | 2.18E-09 | 5.93E-09 |
| SAGE1 | 4.452705 | -0.87302 | 2.18E-09 | 5.93E-09 |
| PSCA | 3.403658 | 5.283441 | 2.20E-09 | 5.98E-09 |
| AIRE | 1.641586 | -2.69257 | 2.23E-09 | 6.05E-09 |
| SEPTIN14 | 4.850173 | -1.34475 | 2.23E-09 | 6.05E-09 |
| FMR1NB | 4.55327 | -1.75617 | 2.26E-09 | 6.15E-09 |
| CX3CL1 | -1.04301 | 6.916928 | 2.37E-09 | 6.42E-09 |
| CBY3 | 1.392598 | -2.77219 | 2.37E-09 | 6.44E-09 |
| VGLL2 | 6.659988 | 0.644419 | 2.38E-09 | 6.46E-09 |
| APOF | 3.09023 | -2.20285 | 2.40E-09 | 6.51E-09 |
| PCSK4 | 1.001335 | 2.188074 | 2.41E-09 | 6.53E-09 |
| CORT | 1.139572 | -2.23574 | 2.41E-09 | 6.54E-09 |
| CDHR3 | -1.44285 | 4.259479 | 2.43E-09 | 6.59E-09 |
| STAG3 | 1.243312 | 2.56066 | 2.45E-09 | 6.63E-09 |
| DCLK1 | 1.19347 | 4.51463 | 2.48E-09 | 6.71E-09 |
| ATP8B3 | 1.360158 | 2.431764 | 2.53E-09 | 6.85E-09 |
| GAS2L2 | -1.44624 | 1.849997 | 2.57E-09 | 6.96E-09 |
| TUBAL3 | 1.986655 | -0.30155 | 2.58E-09 | 6.97E-09 |
| DEFA5 | 9.539486 | 1.433635 | 2.60E-09 | 7.03E-09 |
| EYA4 | -1.34545 | 2.027469 | 2.62E-09 | 7.08E-09 |
| RFPL3 | -1.30837 | -3.90351 | 2.67E-09 | 7.20E-09 |
| GALR3 | 2.85803 | -3.32971 | 2.67E-09 | 7.22E-09 |
| CLGN | 1.834944 | 2.838266 | 2.68E-09 | 7.24E-09 |
| TENM1 | 2.347615 | 3.460083 | 2.70E-09 | 7.28E-09 |
| GAL3ST2 | 2.241304 | -1.14502 | 2.73E-09 | 7.36E-09 |
| DEFB126 | 3.97782 | -3.16746 | 2.73E-09 | 7.36E-09 |
| PCDHA9 | 2.248692 | -1.37699 | 2.77E-09 | 7.45E-09 |
| RP1 | -1.36093 | 2.73717 | 2.77E-09 | 7.46E-09 |
| FSCN2 | 1.05754 | 1.208278 | 2.78E-09 | 7.49E-09 |
| LHX4 | 1.026446 | 0.830839 | 2.81E-09 | 7.57E-09 |
| EDDM3A | 3.275081 | -2.99396 | 2.83E-09 | 7.62E-09 |
| KCNJ18 | 5.435148 | -1.18039 | 2.85E-09 | 7.66E-09 |
| FAM169A | 1.239834 | 1.284951 | 2.86E-09 | 7.71E-09 |
| DCDC2 | -1.20207 | 2.932211 | 2.87E-09 | 7.71E-09 |
| EYA2 | 1.863408 | 4.145012 | 2.94E-09 | 7.89E-09 |
| CHAC1 | 1.019814 | 2.555181 | 2.95E-09 | 7.93E-09 |
| MOGAT3 | 3.69916 | -2.82446 | 2.96E-09 | 7.95E-09 |
| APELA | 2.045728 | -0.20328 | 2.97E-09 | 7.98E-09 |
| OXT | 2.061349 | -2.06563 | 2.98E-09 | 8.01E-09 |
| SCML2 | 1.277633 | 1.116926 | 3.00E-09 | 8.05E-09 |
| IAPP | 3.631538 | -3.49429 | 3.06E-09 | 8.21E-09 |
| FGF3 | 4.710219 | -2.22531 | 3.06E-09 | 8.21E-09 |
| TRIM48 | 7.953376 | 0.568599 | 3.08E-09 | 8.26E-09 |
| UNC13C | 2.238552 | -0.91544 | 3.16E-09 | 8.47E-09 |
| C2orf72 | 1.943736 | 2.549763 | 3.16E-09 | 8.48E-09 |
| F13B | 3.772438 | -3.73546 | 3.18E-09 | 8.52E-09 |
| DCAF8L2 | 4.922437 | -2.65714 | 3.23E-09 | 8.66E-09 |
| SOX15 | 1.440304 | 1.411754 | 3.28E-09 | 8.79E-09 |
| MS4A8 | -1.71911 | 3.574803 | 3.31E-09 | 8.85E-09 |
| KLK14 | 3.415475 | 3.570626 | 3.31E-09 | 8.85E-09 |
| FBN2 | 2.249111 | 2.893096 | 3.37E-09 | 9.00E-09 |
| H4C6 | 6.652293 | -1.04875 | 3.38E-09 | 9.04E-09 |
| RNASEH2A | 1.393559 | -2.8602 | 3.43E-09 | 9.16E-09 |
| LAMB3 | 1.073386 | 8.776069 | 3.44E-09 | 9.20E-09 |
| HNF4A | 2.89608 | 2.837875 | 3.45E-09 | 9.22E-09 |
| RIMS4 | -1.60135 | 0.672618 | 3.46E-09 | 9.26E-09 |
| NKX2-5 | 4.526995 | -1.88844 | 3.50E-09 | 9.34E-09 |
| CDHR4 | -1.61057 | 2.186713 | 3.54E-09 | 9.46E-09 |
| H1-1 | 6.013825 | -1.58038 | 3.62E-09 | 9.65E-09 |
| LCN15 | 4.61997 | 0.231776 | 3.62E-09 | 9.66E-09 |
| G6PC | 5.975709 | 0.633213 | 3.67E-09 | 9.79E-09 |
| GBX2 | 2.773749 | -1.97307 | 3.69E-09 | 9.83E-09 |
| ALX1 | 3.25814 | -1.24023 | 3.72E-09 | 9.91E-09 |
| FGD1 | 1.026003 | 2.596544 | 3.75E-09 | 9.99E-09 |
| MAB21L3 | 1.598282 | -0.17727 | 3.77E-09 | 1.00E-08 |
| TRIM10 | 2.460643 | -1.03165 | 3.82E-09 | 1.02E-08 |
| FCGBP | 1.61883 | 6.463882 | 3.83E-09 | 1.02E-08 |
| DNAAF3 | -1.12168 | 1.169996 | 3.86E-09 | 1.03E-08 |
| C1orf141 | -1.9843 | -0.76045 | 3.89E-09 | 1.03E-08 |
| CCDC181 | -1.09974 | 1.349443 | 4.02E-09 | 1.07E-08 |
| PLEKHG4B | 1.719658 | 4.264031 | 4.05E-09 | 1.07E-08 |
| HTRA3 | 1.105802 | 6.192456 | 4.07E-09 | 1.08E-08 |
| PIFO | -1.07483 | 4.378963 | 4.10E-09 | 1.09E-08 |
| RAMACL | 1.712175 | -0.80797 | 4.11E-09 | 1.09E-08 |
| ZBBX | -1.61419 | 1.647262 | 4.13E-09 | 1.09E-08 |
| UGT3A1 | 5.919124 | 1.646369 | 4.17E-09 | 1.10E-08 |
| GABBR2 | 2.187362 | 2.417901 | 4.25E-09 | 1.12E-08 |
| FAM166A | 1.992287 | -1.99012 | 4.35E-09 | 1.15E-08 |
| C10orf71 | 3.44143 | -1.0051 | 4.47E-09 | 1.18E-08 |
| MGAM | -1.1634 | 0.824382 | 4.60E-09 | 1.22E-08 |
| NME9 | -1.08653 | 0.82364 | 4.62E-09 | 1.22E-08 |
| TMEM252 | -1.33629 | -1.81206 | 4.64E-09 | 1.22E-08 |
| MT1H | 1.873213 | 0.047418 | 4.70E-09 | 1.24E-08 |
| SULT1C3 | 4.588809 | -3.02227 | 4.71E-09 | 1.24E-08 |
| PDLIM4 | 1.249267 | 4.525059 | 4.75E-09 | 1.25E-08 |
| GPC5 | -1.39733 | 1.190091 | 4.88E-09 | 1.29E-08 |
| MOGAT2 | 2.128697 | -1.93338 | 4.89E-09 | 1.29E-08 |
| C8orf34 | -1.10071 | 2.018012 | 5.00E-09 | 1.32E-08 |
| CBLN4 | -1.22049 | -0.01531 | 5.05E-09 | 1.33E-08 |
| CLEC20A | 3.853218 | -1.67807 | 5.19E-09 | 1.36E-08 |
| TEX37 | 3.826891 | -3.47639 | 5.21E-09 | 1.37E-08 |
| PDZD4 | -1.04157 | 2.208261 | 5.36E-09 | 1.41E-08 |
| SLC16A7 | 1.167466 | 4.788661 | 5.49E-09 | 1.44E-08 |
| GJA10 | 4.15895 | -3.5311 | 5.50E-09 | 1.44E-08 |
| ZNF229 | 1.390558 | 2.647893 | 5.60E-09 | 1.47E-08 |
| CFAP94 | -1.09962 | 1.51938 | 5.64E-09 | 1.48E-08 |
| KRT31 | 4.862462 | -1.6444 | 5.69E-09 | 1.49E-08 |
| GABRD | 1.067956 | 1.060929 | 5.72E-09 | 1.50E-08 |
| ZNF114 | 1.821788 | 1.850095 | 5.84E-09 | 1.53E-08 |
| TMTC1 | -1.04291 | 4.281141 | 5.84E-09 | 1.53E-08 |
| DPF1 | 1.442482 | -0.02704 | 5.92E-09 | 1.55E-08 |
| CYP19A1 | 1.334511 | -0.29158 | 5.97E-09 | 1.56E-08 |
| SDS | 1.354216 | 3.69243 | 6.03E-09 | 1.58E-08 |
| ZAR1L | 1.534557 | -3.3177 | 6.03E-09 | 1.58E-08 |
| EDARADD | 1.579646 | 1.728534 | 6.07E-09 | 1.59E-08 |
| LENEP | 1.730247 | -2.86619 | 6.14E-09 | 1.60E-08 |
| ST3GAL3 | 1.141215 | 1.710176 | 6.24E-09 | 1.63E-08 |
| SUSD4 | 1.27227 | 4.11802 | 6.31E-09 | 1.65E-08 |
| PCDHA12 | -1.15335 | 0.687107 | 6.37E-09 | 1.66E-08 |
| TMEM151B | 2.922342 | -1.84795 | 6.38E-09 | 1.66E-08 |
| MUCL1 | 3.259482 | 1.031961 | 6.40E-09 | 1.67E-08 |
| KRT72 | -1.43323 | -3.50029 | 6.45E-09 | 1.68E-08 |
| GPR50 | 4.295054 | -2.24938 | 6.59E-09 | 1.72E-08 |
| GABRR3 | 3.119499 | -3.08449 | 6.63E-09 | 1.73E-08 |
| SYPL2 | -1.01673 | 0.497085 | 6.70E-09 | 1.74E-08 |
| TUBA3C | 6.892309 | 0.464797 | 6.71E-09 | 1.75E-08 |
| IGFBP2 | 1.560838 | 7.725939 | 6.77E-09 | 1.76E-08 |
| CLSTN2 | -1.07339 | 2.469002 | 6.85E-09 | 1.78E-08 |
| PRB1 | 5.997802 | -1.78281 | 7.00E-09 | 1.82E-08 |
| ARHGAP36 | 5.075607 | -1.27973 | 7.05E-09 | 1.83E-08 |
| GPR143 | 1.190634 | 2.241429 | 7.12E-09 | 1.85E-08 |
| SYT1 | 1.66191 | 3.409134 | 7.14E-09 | 1.85E-08 |
| ACTN3 | 2.421624 | -1.36864 | 7.20E-09 | 1.87E-08 |
| NT5C1A | 2.423464 | -1.51815 | 7.24E-09 | 1.88E-08 |
| LSMEM2 | -1.11229 | -3.01355 | 7.28E-09 | 1.89E-08 |
| SLC1A6 | 3.409911 | -1.31747 | 7.30E-09 | 1.89E-08 |
| OR56A3 | 5.005373 | -1.92032 | 7.36E-09 | 1.91E-08 |
| IQCA1 | -1.0477 | 2.761035 | 7.42E-09 | 1.92E-08 |
| DKK1 | 2.425848 | 4.085867 | 7.66E-09 | 1.98E-08 |
| DPPA2 | 6.248229 | -1.91212 | 7.70E-09 | 1.99E-08 |
| GLYATL3 | 5.015814 | -2.06942 | 7.70E-09 | 1.99E-08 |
| PKHD1 | 1.829179 | 1.816285 | 7.77E-09 | 2.01E-08 |
| HSPA6 | 1.324146 | 4.079919 | 8.06E-09 | 2.09E-08 |
| H3Y1 | 4.840117 | -3.04245 | 8.08E-09 | 2.09E-08 |
| NPFFR2 | 3.10797 | -0.12609 | 8.10E-09 | 2.09E-08 |
| PSMA2 | 1.009416 | 0.577387 | 8.13E-09 | 2.10E-08 |
| AANAT | 1.264144 | -1.40574 | 8.15E-09 | 2.11E-08 |
| CCDC177 | 2.56686 | -2.62814 | 8.15E-09 | 2.11E-08 |
| PHOX2A | 4.138029 | -2.85365 | 8.23E-09 | 2.13E-08 |
| PASD1 | 6.51631 | 0.185886 | 8.25E-09 | 2.13E-08 |
| GPR22 | 3.220838 | -0.69494 | 8.26E-09 | 2.13E-08 |
| GRIN3B | -1.17656 | 1.051437 | 8.27E-09 | 2.13E-08 |
| TAS2R13 | 3.423054 | -2.23523 | 8.49E-09 | 2.19E-08 |
| DCBLD2 | 1.164158 | 7.216465 | 8.53E-09 | 2.20E-08 |
| NKX2-2 | 4.939782 | -2.41024 | 8.61E-09 | 2.22E-08 |
| ACTBL2 | 1.732226 | -1.04851 | 8.62E-09 | 2.22E-08 |
| OR10AD1 | 1.438857 | -1.84416 | 8.72E-09 | 2.25E-08 |
| CBLN1 | 2.788638 | -0.06221 | 8.84E-09 | 2.28E-08 |
| MAGEL2 | 1.141065 | -0.2941 | 8.86E-09 | 2.28E-08 |
| XAGE5 | 4.594887 | -3.27998 | 8.87E-09 | 2.28E-08 |
| ZNF730 | 1.770152 | -0.04141 | 8.98E-09 | 2.31E-08 |
| DAZL | 2.461839 | -2.21402 | 9.03E-09 | 2.32E-08 |
| KCNH4 | 1.109241 | -1.12696 | 9.17E-09 | 2.36E-08 |
| PILRB | 1.202127 | 2.279729 | 9.41E-09 | 2.42E-08 |
| SPATA16 | 3.779875 | -3.66304 | 9.49E-09 | 2.44E-08 |
| SLC26A4 | 2.310362 | 3.34619 | 9.53E-09 | 2.45E-08 |
| NLRP5 | 5.406746 | -1.25824 | 9.54E-09 | 2.45E-08 |
| SV2A | 1.333213 | 3.263488 | 9.63E-09 | 2.47E-08 |
| TDRD12 | 2.325291 | 0.72504 | 9.74E-09 | 2.50E-08 |
| CNMD | 4.817643 | 4.125026 | 9.80E-09 | 2.51E-08 |
| EGR4 | 1.985366 | -0.80954 | 9.84E-09 | 2.52E-08 |
| CYP11B1 | 6.582362 | -0.51267 | 9.86E-09 | 2.53E-08 |
| PCSK6 | 1.060233 | 4.032235 | 1.00E-08 | 2.57E-08 |
| EPHA6 | 2.232734 | -0.67881 | 1.01E-08 | 2.59E-08 |
| EREG | 2.605672 | 5.153488 | 1.05E-08 | 2.68E-08 |
| MAGEA9 | 4.579126 | -3.30058 | 1.09E-08 | 2.79E-08 |
| ADGRL3 | -1.15884 | 2.112137 | 1.10E-08 | 2.81E-08 |
| GPR52 | 2.999259 | -1.87479 | 1.11E-08 | 2.83E-08 |
| CLEC12B | -1.15453 | -1.92349 | 1.14E-08 | 2.90E-08 |
| WNT10B | 1.19909 | 0.111088 | 1.14E-08 | 2.91E-08 |
| ELOA2 | 2.436168 | -3.52895 | 1.15E-08 | 2.92E-08 |
| CNNM1 | 1.793322 | 1.30105 | 1.16E-08 | 2.96E-08 |
| PDE11A | 1.619712 | -1.32882 | 1.17E-08 | 2.99E-08 |
| NPBWR1 | 2.149449 | -0.14433 | 1.17E-08 | 2.99E-08 |
| HSD3B2 | 4.454065 | -1.17402 | 1.17E-08 | 2.99E-08 |
| TMPRSS15 | 3.16988 | -2.53357 | 1.20E-08 | 3.06E-08 |
| HSD17B13 | -1.44484 | 1.770212 | 1.20E-08 | 3.06E-08 |
| AC004687.2 | 1.09478 | -2.15418 | 1.21E-08 | 3.08E-08 |
| MAGEB16 | 5.987551 | -1.79953 | 1.21E-08 | 3.08E-08 |
| SIAH3 | -1.15251 | -1.47881 | 1.21E-08 | 3.08E-08 |
| IGSF11 | 1.648973 | -0.20448 | 1.21E-08 | 3.09E-08 |
| ANKRD36B | 1.232257 | 1.365153 | 1.24E-08 | 3.14E-08 |
| MGAM2 | 2.707353 | -0.74669 | 1.24E-08 | 3.16E-08 |
| H2AC19 | 2.492796 | -2.84371 | 1.24E-08 | 3.16E-08 |
| MOV10L1 | 1.438913 | -0.03863 | 1.26E-08 | 3.20E-08 |
| UGT3A2 | 2.062813 | -1.07457 | 1.27E-08 | 3.22E-08 |
| NWD2 | 3.301461 | -3.07166 | 1.28E-08 | 3.23E-08 |
| MTMR7 | 1.779785 | 2.820625 | 1.30E-08 | 3.30E-08 |
| GDAP1L1 | 1.979228 | -1.98402 | 1.32E-08 | 3.34E-08 |
| AMH | 1.838283 | 0.328252 | 1.33E-08 | 3.37E-08 |
| ADAM18 | 3.286338 | -3.56099 | 1.34E-08 | 3.40E-08 |
| SOX30 | 1.593601 | -0.06193 | 1.35E-08 | 3.41E-08 |
| PAK3 | 1.857818 | 2.664699 | 1.37E-08 | 3.47E-08 |
| IFNL3 | 2.65655 | -3.86662 | 1.38E-08 | 3.49E-08 |
| AC021087.5 | 1.122508 | -0.96894 | 1.38E-08 | 3.50E-08 |
| GABRG2 | 4.28473 | -0.78882 | 1.39E-08 | 3.50E-08 |
| TRIM71 | -1.54847 | 1.107843 | 1.40E-08 | 3.54E-08 |
| CKLF | 1.594987 | -1.74519 | 1.41E-08 | 3.56E-08 |
| CPLX1 | 1.136233 | 2.422736 | 1.42E-08 | 3.58E-08 |
| AL031708.1 | 1.196817 | -1.54006 | 1.43E-08 | 3.60E-08 |
| TMEM215 | 2.282998 | -1.24613 | 1.44E-08 | 3.64E-08 |
| RIMBP2 | 2.523983 | 1.773378 | 1.45E-08 | 3.66E-08 |
| SPRN | 1.114316 | -1.90161 | 1.48E-08 | 3.73E-08 |
| AWAT1 | 3.023197 | -2.66456 | 1.49E-08 | 3.75E-08 |
| SPRR1A | 3.625539 | 0.264121 | 1.49E-08 | 3.75E-08 |
| HPX | 1.693384 | 1.350096 | 1.52E-08 | 3.82E-08 |
| POLR2J3 | 1.01564 | -0.04989 | 1.52E-08 | 3.82E-08 |
| SLC17A4 | 4.041153 | -2.49954 | 1.52E-08 | 3.83E-08 |
| IRX4 | 4.342136 | -0.90343 | 1.53E-08 | 3.85E-08 |
| PKP1 | 2.273898 | 5.33712 | 1.63E-08 | 4.08E-08 |
| GAGE1 | 6.080476 | -1.8306 | 1.64E-08 | 4.12E-08 |
| CAPN13 | 1.629353 | 5.883766 | 1.64E-08 | 4.12E-08 |
| FTHL17 | 6.481851 | -1.11973 | 1.65E-08 | 4.15E-08 |
| ACTL10 | 1.237765 | -3.23808 | 1.66E-08 | 4.15E-08 |
| BARHL2 | 4.216994 | -3.06213 | 1.66E-08 | 4.16E-08 |
| KRTAP9-1 | 3.125787 | -3.96639 | 1.69E-08 | 4.25E-08 |
| SOX9 | 1.396421 | 5.287506 | 1.70E-08 | 4.25E-08 |
| MATR3 | 1.393191 | 1.227142 | 1.70E-08 | 4.26E-08 |
| SLC13A3 | 1.285298 | 2.907003 | 1.73E-08 | 4.32E-08 |
| MGAT4D | -1.66594 | -3.76046 | 1.79E-08 | 4.49E-08 |
| SLC18A2 | -1.0035 | 0.958453 | 1.84E-08 | 4.60E-08 |
| TAFA3 | 1.953741 | -2.37944 | 1.85E-08 | 4.63E-08 |
| ARL6IP4 | 1.070938 | -1.37772 | 1.85E-08 | 4.64E-08 |
| DPP4 | 1.313358 | 7.194164 | 1.86E-08 | 4.64E-08 |
| FAM9C | 3.906129 | -0.82716 | 1.89E-08 | 4.73E-08 |
| PCDHA6 | 1.805593 | -0.32385 | 1.90E-08 | 4.74E-08 |
| PTPRZ1 | 2.081121 | 3.495602 | 1.91E-08 | 4.78E-08 |
| PCDHGA8 | 1.898821 | 0.017448 | 1.95E-08 | 4.87E-08 |
| APLP1 | 1.482258 | 3.702525 | 1.96E-08 | 4.89E-08 |
| CFAP46 | -1.34581 | 1.716636 | 1.98E-08 | 4.94E-08 |
| B3GALT5 | 2.818996 | 3.030221 | 2.02E-08 | 5.04E-08 |
| NEUROD4 | 6.173055 | -1.87662 | 2.04E-08 | 5.08E-08 |
| ZC3H11A | 1.392236 | -1.701 | 2.07E-08 | 5.17E-08 |
| ADAM33 | -1.02275 | 1.815411 | 2.09E-08 | 5.20E-08 |
| NKX2-3 | 3.148405 | -0.46066 | 2.09E-08 | 5.21E-08 |
| EVX2 | 3.353166 | -3.71029 | 2.11E-08 | 5.24E-08 |
| CRP | 3.70154 | -1.02697 | 2.16E-08 | 5.38E-08 |
| CTCFL | 3.974456 | -0.09411 | 2.19E-08 | 5.43E-08 |
| PHGR1 | 3.42812 | -0.80755 | 2.19E-08 | 5.43E-08 |
| CHAD | 1.719883 | 1.676227 | 2.21E-08 | 5.50E-08 |
| AC007906.2 | -1.33985 | 3.357909 | 2.24E-08 | 5.55E-08 |
| CFTR | -1.21693 | 4.6608 | 2.28E-08 | 5.64E-08 |
| LIPF | 4.832878 | -1.27754 | 2.33E-08 | 5.78E-08 |
| KNG1 | 3.328707 | -0.40116 | 2.36E-08 | 5.84E-08 |
| SPDYE1 | 1.251609 | -0.56815 | 2.37E-08 | 5.88E-08 |
| PSG8 | 5.567249 | -2.14442 | 2.39E-08 | 5.90E-08 |
| MET | 1.307899 | 8.322966 | 2.42E-08 | 5.98E-08 |
| ITGB8 | 1.453873 | 5.537914 | 2.46E-08 | 6.08E-08 |
| DPYSL4 | 1.260037 | 1.217386 | 2.46E-08 | 6.09E-08 |
| GRIK5 | 1.699981 | 1.444243 | 2.47E-08 | 6.10E-08 |
| AGMO | 2.110684 | 0.118154 | 2.49E-08 | 6.15E-08 |
| SLC25A32 | 1.254477 | -1.47386 | 2.52E-08 | 6.23E-08 |
| IGFL1 | 3.451963 | -0.68068 | 2.53E-08 | 6.24E-08 |
| SPAG11A | 6.675744 | -1.41709 | 2.56E-08 | 6.32E-08 |
| SPATA46 | 1.299923 | -1.208 | 2.59E-08 | 6.40E-08 |
| MAGEA2 | 3.728369 | -3.62887 | 2.60E-08 | 6.42E-08 |
| SEPTIN5 | 1.394277 | -2.25986 | 2.60E-08 | 6.42E-08 |
| CACNA1B | 2.638094 | 0.382138 | 2.61E-08 | 6.43E-08 |
| MEP1A | 1.806596 | -0.22778 | 2.61E-08 | 6.44E-08 |
| ZNF560 | 3.839219 | 0.052899 | 2.63E-08 | 6.48E-08 |
| KIF25 | 1.280061 | 0.218667 | 2.64E-08 | 6.50E-08 |
| SLC5A11 | 1.75229 | -1.13318 | 2.66E-08 | 6.55E-08 |
| SDK1 | 1.181791 | 5.520802 | 2.66E-08 | 6.55E-08 |
| MYH7 | 2.651979 | -2.10477 | 2.66E-08 | 6.56E-08 |
| PVRIG | 1.33957 | -2.00527 | 2.70E-08 | 6.63E-08 |
| SPIN2A | 1.377817 | -1.81593 | 2.70E-08 | 6.64E-08 |
| KIF5C | 1.485266 | 2.127695 | 2.70E-08 | 6.65E-08 |
| PDE10A | 1.642018 | 4.00386 | 2.71E-08 | 6.67E-08 |
| TAS2R30 | 3.755317 | -1.36551 | 2.76E-08 | 6.78E-08 |
| SMIM38 | 1.9999 | -0.62475 | 2.77E-08 | 6.81E-08 |
| FAM9A | 4.39105 | -3.44843 | 2.79E-08 | 6.86E-08 |
| KLHL41 | -1.04136 | -0.73479 | 2.80E-08 | 6.87E-08 |
| GHSR | -1.7996 | -3.83058 | 2.86E-08 | 7.01E-08 |
| AC138969.1 | 1.407525 | -2.50245 | 2.86E-08 | 7.01E-08 |
| ORM2 | 2.015057 | 2.655418 | 2.86E-08 | 7.02E-08 |
| MMP16 | 1.222391 | 1.65018 | 2.86E-08 | 7.02E-08 |
| ZNF556 | 2.092313 | -1.43858 | 2.87E-08 | 7.04E-08 |
| CLTRN | 1.579233 | 2.092201 | 2.87E-08 | 7.05E-08 |
| LRRTM1 | 3.142075 | 0.824448 | 2.88E-08 | 7.07E-08 |
| GPR37L1 | 1.225904 | -0.28691 | 2.89E-08 | 7.07E-08 |
| TMPRSS9 | 1.086939 | -0.18127 | 2.89E-08 | 7.08E-08 |
| CLEC2A | 5.090784 | -1.33154 | 2.93E-08 | 7.18E-08 |
| CREB3L3 | 2.9585 | -0.60931 | 2.94E-08 | 7.21E-08 |
| DLGAP3 | 1.37861 | 0.239633 | 2.95E-08 | 7.23E-08 |
| CPLX2 | 4.186078 | 4.894162 | 2.98E-08 | 7.30E-08 |
| PAK5 | -1.52143 | -2.27025 | 3.00E-08 | 7.35E-08 |
| TTC6 | 1.282985 | 2.380399 | 3.01E-08 | 7.36E-08 |
| MUC5AC | 3.815818 | 8.735614 | 3.06E-08 | 7.49E-08 |
| KCNK2 | 2.22043 | 0.159353 | 3.11E-08 | 7.60E-08 |
| SEC11C | 1.06577 | 6.849236 | 3.13E-08 | 7.65E-08 |
| SLC45A2 | 1.650384 | -1.92086 | 3.13E-08 | 7.65E-08 |
| PKP2 | 1.452771 | 4.424469 | 3.28E-08 | 8.01E-08 |
| KRTAP3-1 | 3.132759 | -1.74976 | 3.30E-08 | 8.04E-08 |
| ERO1B | 1.124256 | 4.974251 | 3.31E-08 | 8.06E-08 |
| ALPI | 4.338987 | -2.8411 | 3.34E-08 | 8.14E-08 |
| CNTNAP5 | 3.721361 | -2.7372 | 3.38E-08 | 8.23E-08 |
| FAM81B | -1.20275 | 2.330341 | 3.41E-08 | 8.31E-08 |
| NT5DC4 | 1.541279 | -1.55532 | 3.42E-08 | 8.32E-08 |
| METTL21C | -1.42505 | -3.50196 | 3.43E-08 | 8.35E-08 |
| PPM1N | 1.100253 | 1.289688 | 3.44E-08 | 8.37E-08 |
| KLRF2 | 2.771608 | -2.73885 | 3.44E-08 | 8.38E-08 |
| OR2AG2 | 1.715306 | -2.68312 | 3.48E-08 | 8.47E-08 |
| SLC8A2 | 2.015259 | 0.018991 | 3.60E-08 | 8.74E-08 |
| AC010980.1 | 1.337281 | -0.01074 | 3.67E-08 | 8.91E-08 |
| FOXQ1 | 1.499663 | 5.353918 | 3.68E-08 | 8.93E-08 |
| IGF2 | 2.951806 | 2.799666 | 3.71E-08 | 8.99E-08 |
| TH | 2.262285 | -1.50655 | 3.83E-08 | 9.27E-08 |
| LRRC74A | -1.08759 | -2.94266 | 4.02E-08 | 9.72E-08 |
| KRT34 | 3.243309 | -3.41869 | 4.13E-08 | 9.98E-08 |
| MYRFL | 1.902643 | 0.259005 | 4.20E-08 | 1.01E-07 |
| MKRN3 | 2.318814 | 0.365595 | 4.22E-08 | 1.02E-07 |
| RBPJL | 1.962401 | -2.89745 | 4.23E-08 | 1.02E-07 |
| PAGE1 | 5.141722 | -0.33385 | 4.31E-08 | 1.04E-07 |
| UPK1A | 2.470656 | -1.48792 | 4.33E-08 | 1.04E-07 |
| HCN1 | 2.793965 | 0.508932 | 4.36E-08 | 1.05E-07 |
| MCHR2 | 3.219587 | -3.00635 | 4.38E-08 | 1.05E-07 |
| ATP1A3 | 1.589192 | -1.13829 | 4.38E-08 | 1.05E-07 |
| DIPK1C | 2.303227 | -2.10913 | 4.40E-08 | 1.06E-07 |
| GKN2 | -1.78198 | 4.515053 | 4.41E-08 | 1.06E-07 |
| IPCEF1 | 1.220431 | 3.674589 | 4.41E-08 | 1.06E-07 |
| NELL1 | 3.175477 | 3.25396 | 4.45E-08 | 1.07E-07 |
| CD70 | 1.247296 | 0.429715 | 4.70E-08 | 1.13E-07 |
| KRT33A | 5.265918 | -2.38246 | 4.79E-08 | 1.15E-07 |
| LHX3 | 2.992259 | -3.48307 | 4.82E-08 | 1.16E-07 |
| REEP2 | 1.027332 | 1.198074 | 4.87E-08 | 1.17E-07 |
| PSG7 | 4.491213 | -3.36978 | 4.88E-08 | 1.17E-07 |
| CCDC33 | -1.28386 | 1.75736 | 4.89E-08 | 1.17E-07 |
| SEMA7A | 1.000478 | 4.465406 | 4.90E-08 | 1.18E-07 |
| DCAF8L1 | 3.905283 | -3.46117 | 4.90E-08 | 1.18E-07 |
| RTL1 | 3.791839 | -1.38901 | 5.04E-08 | 1.21E-07 |
| CAPNS2 | 2.576909 | 0.123876 | 5.10E-08 | 1.22E-07 |
| TAS2R20 | 1.073293 | -0.46773 | 5.16E-08 | 1.24E-07 |
| CWH43 | -1.77085 | 0.351104 | 5.34E-08 | 1.28E-07 |
| CGB8 | 3.603192 | -3.09269 | 5.41E-08 | 1.29E-07 |
| EN1 | 3.025763 | -2.14131 | 5.48E-08 | 1.31E-07 |
| GAST | 3.575941 | -3.48788 | 5.53E-08 | 1.32E-07 |
| SPIC | 3.330135 | -1.55932 | 5.54E-08 | 1.32E-07 |
| ANGPTL4 | 1.461922 | 5.924444 | 5.69E-08 | 1.36E-07 |
| C13orf42 | -1.57317 | -3.63156 | 5.73E-08 | 1.37E-07 |
| FAM240C | 1.682168 | -2.62662 | 5.79E-08 | 1.38E-07 |
| ZNF486 | 1.368538 | 4.639303 | 5.81E-08 | 1.38E-07 |
| C20orf141 | 3.124415 | -3.91575 | 6.15E-08 | 1.46E-07 |
| LYZL2 | 3.515509 | -3.77371 | 6.25E-08 | 1.49E-07 |
| OR10G2 | 2.321165 | -3.66151 | 6.31E-08 | 1.50E-07 |
| FOXR2 | 4.954663 | -2.86585 | 6.44E-08 | 1.53E-07 |
| SAA1 | 1.914098 | 4.244781 | 6.48E-08 | 1.54E-07 |
| CTAG2 | 5.662611 | 1.005897 | 6.56E-08 | 1.56E-07 |
| ASCL2 | 1.33618 | 1.839958 | 6.61E-08 | 1.57E-07 |
| ACSM4 | 1.67553 | -1.88243 | 6.63E-08 | 1.57E-07 |
| PLCH2 | 1.274672 | 2.916448 | 6.73E-08 | 1.60E-07 |
| FAM83C | 3.707376 | -2.1495 | 6.75E-08 | 1.60E-07 |
| BFSP2 | 1.324106 | -1.19463 | 6.79E-08 | 1.61E-07 |
| PLPPR3 | -1.28794 | 1.169065 | 6.81E-08 | 1.61E-07 |
| CXCL13 | 1.587688 | 5.181716 | 6.90E-08 | 1.63E-07 |
| FANCD2OS | 1.592886 | -3.51876 | 6.97E-08 | 1.65E-07 |
| CCDC78 | -1.07376 | 3.066312 | 6.98E-08 | 1.65E-07 |
| CALCR | 1.7616 | 0.277888 | 7.01E-08 | 1.66E-07 |
| KRT33B | 3.256921 | -3.67599 | 7.04E-08 | 1.67E-07 |
| MAGEB2 | 4.955049 | 0.938854 | 7.05E-08 | 1.67E-07 |
| MCCD1 | 3.875711 | -2.31081 | 7.11E-08 | 1.68E-07 |
| UTS2R | 2.037723 | -2.22105 | 7.14E-08 | 1.69E-07 |
| PTH2R | 2.034118 | -0.06069 | 7.22E-08 | 1.71E-07 |
| RAX | 3.773694 | -1.88434 | 7.36E-08 | 1.74E-07 |
| LMX1B | 1.98539 | 0.675721 | 7.36E-08 | 1.74E-07 |
| TBR1 | 2.592499 | -2.63035 | 7.37E-08 | 1.74E-07 |
| MAGEB6 | 3.437277 | -3.63963 | 7.44E-08 | 1.76E-07 |
| FBXO2 | 1.206126 | 4.432291 | 7.50E-08 | 1.77E-07 |
| AL353588.1 | 1.207353 | -2.96577 | 7.51E-08 | 1.77E-07 |
| BPIFB6 | 3.92914 | -3.12767 | 7.64E-08 | 1.80E-07 |
| WNT8B | 1.209652 | -1.75093 | 7.76E-08 | 1.83E-07 |
| ADCY10 | 1.159504 | -1.63137 | 7.76E-08 | 1.83E-07 |
| HOXA9 | 1.862466 | -0.44299 | 7.83E-08 | 1.85E-07 |
| POU3F3 | 3.954929 | -1.06127 | 8.02E-08 | 1.89E-07 |
| BCL2L2-PABPN1 | 1.1004 | -2.37438 | 8.08E-08 | 1.90E-07 |
| CGB3 | 3.622456 | -3.02012 | 8.13E-08 | 1.91E-07 |
| OMG | -1.19594 | 2.442416 | 8.19E-08 | 1.93E-07 |
| POU4F3 | 1.607529 | -1.82627 | 8.25E-08 | 1.94E-07 |
| COLGALT2 | -1.16508 | 2.250287 | 8.88E-08 | 2.09E-07 |
| SPAG11B | 6.60324 | -1.04404 | 8.92E-08 | 2.09E-07 |
| PLCZ1 | 2.80342 | -2.20013 | 8.95E-08 | 2.10E-07 |
| ANKRD33 | 2.159557 | -2.61532 | 9.07E-08 | 2.13E-07 |
| CCDC27 | 1.471666 | -2.71895 | 9.08E-08 | 2.13E-07 |
| SFRP2 | 1.304871 | 7.147404 | 9.11E-08 | 2.13E-07 |
| PCDH11X | -1.4285 | -2.53778 | 9.16E-08 | 2.15E-07 |
| DCDC1 | -1.24553 | 0.209251 | 9.52E-08 | 2.23E-07 |
| OSTN | -1.57655 | -2.91242 | 9.53E-08 | 2.23E-07 |
| CERS3 | 3.108584 | -0.83946 | 9.58E-08 | 2.24E-07 |
| TYRP1 | -1.08156 | 1.595274 | 9.65E-08 | 2.26E-07 |
| FBXL16 | 1.285558 | 3.604803 | 9.66E-08 | 2.26E-07 |
| CFAP298-TCP10L | 1.195435 | 0.084202 | 1.01E-07 | 2.36E-07 |
| SERPINA7 | 4.111783 | -3.2335 | 1.03E-07 | 2.39E-07 |
| TLR10 | 1.223158 | 2.225841 | 1.04E-07 | 2.43E-07 |
| SOX3 | 3.804384 | -2.43249 | 1.05E-07 | 2.44E-07 |
| CLIC6 | 1.266799 | 7.348118 | 1.05E-07 | 2.44E-07 |
| FAM227A | 1.127066 | 3.230627 | 1.05E-07 | 2.46E-07 |
| CHI3L1 | 1.46747 | 7.758424 | 1.07E-07 | 2.50E-07 |
| ACTL6B | 3.511133 | -1.46374 | 1.10E-07 | 2.55E-07 |
| FRG2 | 3.874034 | -3.66967 | 1.10E-07 | 2.55E-07 |
| GPR82 | 1.184542 | 0.892517 | 1.11E-07 | 2.59E-07 |
| OR2I1P | 1.394949 | 4.608284 | 1.13E-07 | 2.63E-07 |
| OR13H1 | 3.89211 | -3.72675 | 1.14E-07 | 2.64E-07 |
| AC069503.2 | 1.493786 | -3.46776 | 1.14E-07 | 2.66E-07 |
| UGT2A3 | 5.038407 | -0.07108 | 1.18E-07 | 2.73E-07 |
| KIF19 | -1.21777 | 2.30559 | 1.18E-07 | 2.74E-07 |
| CSAG2 | 3.957376 | -2.66435 | 1.18E-07 | 2.74E-07 |
| S100B | 1.289217 | 3.501422 | 1.20E-07 | 2.79E-07 |
| ARMC3 | -1.17756 | 2.744484 | 1.20E-07 | 2.79E-07 |
| OLIG3 | 4.984626 | -2.32784 | 1.20E-07 | 2.80E-07 |
| AP003108.2 | 1.05114 | -0.29626 | 1.21E-07 | 2.81E-07 |
| CASR | 2.856696 | 1.328264 | 1.23E-07 | 2.86E-07 |
| GLTPD2 | 1.52246 | 1.223358 | 1.23E-07 | 2.86E-07 |
| CFHR5 | 2.678627 | -3.65587 | 1.26E-07 | 2.91E-07 |
| ADH4 | 2.619237 | -0.44937 | 1.26E-07 | 2.92E-07 |
| ZG16 | 2.462012 | -1.25264 | 1.28E-07 | 2.96E-07 |
| JAKMIP1 | 1.269825 | -1.9845 | 1.29E-07 | 2.98E-07 |
| LYZ | -1.01329 | 8.929437 | 1.29E-07 | 2.98E-07 |
| KLRG2 | -1.10453 | 1.837965 | 1.29E-07 | 2.98E-07 |
| TMEM210 | 2.491271 | -3.55228 | 1.30E-07 | 3.01E-07 |
| IGDCC3 | 2.427486 | -0.60964 | 1.31E-07 | 3.04E-07 |
| SMTNL1 | 1.265047 | 0.094342 | 1.32E-07 | 3.06E-07 |
| ANKRD36 | 1.146803 | 2.390203 | 1.32E-07 | 3.06E-07 |
| CNTN2 | 1.642003 | -1.46901 | 1.32E-07 | 3.06E-07 |
| MED12L | 1.236359 | 0.122067 | 1.34E-07 | 3.10E-07 |
| RSPH6A | 2.903546 | -3.06897 | 1.34E-07 | 3.11E-07 |
| MMP20 | 2.816909 | -3.23772 | 1.37E-07 | 3.17E-07 |
| PCDHA8 | 1.502398 | -2.23878 | 1.38E-07 | 3.19E-07 |
| FOXD1 | 2.187117 | -0.44679 | 1.41E-07 | 3.25E-07 |
| AP003071.5 | 1.606771 | 0.883431 | 1.42E-07 | 3.27E-07 |
| SHISAL1 | 1.404713 | 2.319592 | 1.42E-07 | 3.27E-07 |
| AL391987.2 | 1.298614 | -2.67339 | 1.44E-07 | 3.32E-07 |
| PCDHB8 | 1.45247 | 1.204511 | 1.44E-07 | 3.32E-07 |
| TEX13B | 3.861172 | -3.3668 | 1.45E-07 | 3.33E-07 |
| PTGFR | -1.186 | 2.301178 | 1.47E-07 | 3.39E-07 |
| RIC3 | -1.03313 | 1.999769 | 1.48E-07 | 3.39E-07 |
| OR1J1 | 2.253288 | -3.75889 | 1.48E-07 | 3.41E-07 |
| GTSF1 | 1.918327 | 1.736006 | 1.49E-07 | 3.42E-07 |
| KCNH2 | 1.49098 | 3.573774 | 1.49E-07 | 3.42E-07 |
| CA12 | 1.622941 | 5.909577 | 1.52E-07 | 3.48E-07 |
| MROH2A | 2.262708 | 0.291181 | 1.52E-07 | 3.49E-07 |
| IGSF5 | 1.481509 | -1.7213 | 1.54E-07 | 3.53E-07 |
| PERCC1 | 2.773432 | 0.010856 | 1.57E-07 | 3.60E-07 |
| RPEL1 | 1.348354 | -3.19338 | 1.58E-07 | 3.63E-07 |
| PRR4 | 1.001036 | -1.09042 | 1.58E-07 | 3.63E-07 |
| SLC7A3 | 2.851383 | -1.25509 | 1.61E-07 | 3.69E-07 |
| KRT23 | 2.411889 | 2.473648 | 1.62E-07 | 3.72E-07 |
| FGF4 | 4.528038 | -2.776 | 1.66E-07 | 3.79E-07 |
| PRSS45P | 2.070621 | -3.70153 | 1.66E-07 | 3.80E-07 |
| LRRN1 | 1.431198 | 3.826271 | 1.67E-07 | 3.82E-07 |
| TMEM262 | 1.049378 | -2.80299 | 1.69E-07 | 3.86E-07 |
| KLK3 | -2.26373 | -1.95285 | 1.72E-07 | 3.94E-07 |
| CXCL9 | 1.362274 | 6.751412 | 1.73E-07 | 3.94E-07 |
| PRLR | 1.592647 | 3.61335 | 1.76E-07 | 4.01E-07 |
| C10orf53 | -1.58146 | -3.73411 | 1.77E-07 | 4.04E-07 |
| NEUROG2 | 2.990286 | -3.61348 | 1.80E-07 | 4.10E-07 |
| TSPO2 | 1.187151 | -1.77285 | 1.85E-07 | 4.21E-07 |
| NOTO | 2.630223 | -1.33684 | 1.85E-07 | 4.21E-07 |
| CCDC114 | -1.04659 | 2.811811 | 1.86E-07 | 4.23E-07 |
| KCNF1 | 1.731505 | 0.550519 | 1.86E-07 | 4.23E-07 |
| INSL6 | 1.887988 | -0.9352 | 1.87E-07 | 4.25E-07 |
| OR51E2 | 2.526636 | -2.04308 | 1.88E-07 | 4.27E-07 |
| CYP4F8 | 3.717363 | -2.60149 | 1.89E-07 | 4.31E-07 |
| CHRNG | 2.247231 | -3.12218 | 1.90E-07 | 4.33E-07 |
| CD19 | 1.28879 | 2.241084 | 1.91E-07 | 4.33E-07 |
| ABCG8 | 1.926502 | -2.23506 | 1.92E-07 | 4.36E-07 |
| PTP4A1 | 1.144487 | -0.24451 | 1.92E-07 | 4.36E-07 |
| CERS1 | 1.432051 | -1.21508 | 1.93E-07 | 4.38E-07 |
| PROZ | 1.406503 | -1.80928 | 1.98E-07 | 4.48E-07 |
| SNCG | 1.495244 | 4.845345 | 1.98E-07 | 4.48E-07 |
| LRRC26 | 2.349739 | -0.6486 | 1.98E-07 | 4.49E-07 |
| STMN2 | 2.159655 | 1.126999 | 2.00E-07 | 4.53E-07 |
| PAX6 | 2.793785 | -1.92799 | 2.01E-07 | 4.55E-07 |
| FIGNL2 | 1.2639 | -0.30982 | 2.03E-07 | 4.59E-07 |
| STAC2 | 2.000959 | 1.382591 | 2.03E-07 | 4.61E-07 |
| KLK15 | 3.3743 | -3.42202 | 2.18E-07 | 4.93E-07 |
| SLC52A1 | 1.115381 | 1.870474 | 2.19E-07 | 4.94E-07 |
| FURIN | 1.037456 | 8.714261 | 2.19E-07 | 4.96E-07 |
| PLA2G3 | -1.30695 | 1.536691 | 2.21E-07 | 4.99E-07 |
| PIK3R2 | 1.043087 | -2.68657 | 2.23E-07 | 5.04E-07 |
| PDYN | -1.36989 | -3.88379 | 2.25E-07 | 5.07E-07 |
| ANKUB1 | -1.43645 | 0.26818 | 2.31E-07 | 5.21E-07 |
| PCDH10 | -1.23052 | 0.332402 | 2.36E-07 | 5.31E-07 |
| OTOR | 2.910064 | -3.40493 | 2.42E-07 | 5.45E-07 |
| NKX6-3 | 2.25615 | -2.63433 | 2.48E-07 | 5.58E-07 |
| UTF1 | -1.20731 | -3.74055 | 2.52E-07 | 5.65E-07 |
| PCDHA7 | 1.365341 | -0.35851 | 2.52E-07 | 5.67E-07 |
| SFRP4 | 1.145132 | 6.185034 | 2.56E-07 | 5.75E-07 |
| ODC1 | 1.301552 | 8.383046 | 2.59E-07 | 5.81E-07 |
| CHRM4 | -1.14283 | -1.25524 | 2.59E-07 | 5.82E-07 |
| CCL1 | 1.898444 | -2.62309 | 2.61E-07 | 5.86E-07 |
| NTSR2 | 3.70778 | -2.97139 | 2.61E-07 | 5.86E-07 |
| TRIM49 | 3.510912 | -3.72779 | 2.64E-07 | 5.91E-07 |
| DYNAP | 2.94413 | -3.72253 | 2.69E-07 | 6.03E-07 |
| GJB1 | 1.758882 | 4.466818 | 2.73E-07 | 6.11E-07 |
| CLEC2L | 2.508432 | -0.44614 | 2.75E-07 | 6.16E-07 |
| GLYATL1 | 2.051748 | -1.24007 | 2.77E-07 | 6.20E-07 |
| L1CAM | 1.851244 | 2.483444 | 2.77E-07 | 6.21E-07 |
| CYP2C19 | 2.036992 | -1.4546 | 2.80E-07 | 6.27E-07 |
| LYZL4 | 1.864611 | -3.70116 | 2.81E-07 | 6.29E-07 |
| GRAMD1B | 1.349717 | 4.105645 | 2.81E-07 | 6.30E-07 |
| CACNG6 | -1.52573 | 1.112556 | 2.82E-07 | 6.32E-07 |
| PDZK1 | 1.061842 | -0.75944 | 2.88E-07 | 6.45E-07 |
| PNMA6F | 4.090458 | -2.90255 | 2.91E-07 | 6.50E-07 |
| LGALS13 | 4.269506 | -3.50307 | 2.92E-07 | 6.52E-07 |
| CYP2C9 | 1.976116 | 0.282716 | 2.92E-07 | 6.52E-07 |
| MMP8 | 1.749825 | -0.59869 | 2.93E-07 | 6.55E-07 |
| GRK1 | 2.019003 | -0.38841 | 2.93E-07 | 6.55E-07 |
| IL22RA1 | 1.462737 | 2.201284 | 2.94E-07 | 6.55E-07 |
| BANF2 | 2.940773 | -3.71466 | 2.95E-07 | 6.57E-07 |
| BHMG1 | 2.118786 | -3.11218 | 2.96E-07 | 6.61E-07 |
| CACNA1G | 1.392948 | 0.544511 | 3.03E-07 | 6.76E-07 |
| HRH3 | 3.982666 | -1.88758 | 3.07E-07 | 6.84E-07 |
| KRT32 | 1.905849 | -1.995 | 3.11E-07 | 6.93E-07 |
| RPE65 | 2.920972 | -2.08249 | 3.13E-07 | 6.98E-07 |
| DMRTB1 | 3.394553 | -3.89409 | 3.13E-07 | 6.98E-07 |
| CCDC73 | 1.163016 | -2.28564 | 3.14E-07 | 6.99E-07 |
| TM6SF2 | 1.048027 | -1.65916 | 3.15E-07 | 7.01E-07 |
| DRGX | 2.226631 | 1.388579 | 3.20E-07 | 7.11E-07 |
| AC001226.2 | 1.815378 | -0.74314 | 3.34E-07 | 7.42E-07 |
| PRLHR | 4.014803 | -1.70921 | 3.34E-07 | 7.42E-07 |
| KCNG1 | 1.813552 | -0.26822 | 3.35E-07 | 7.44E-07 |
| GAB4 | 4.170249 | -2.60259 | 3.36E-07 | 7.47E-07 |
| CBS | 1.343265 | 0.36206 | 3.37E-07 | 7.50E-07 |
| ANK1 | 1.325719 | 1.716704 | 3.42E-07 | 7.59E-07 |
| CLPS | 2.858555 | -3.06058 | 3.45E-07 | 7.66E-07 |
| SNX31 | 2.240177 | -1.29037 | 3.47E-07 | 7.69E-07 |
| C5orf38 | -1.09622 | 3.428647 | 3.56E-07 | 7.88E-07 |
| IFNL1 | 1.712766 | -3.05296 | 3.57E-07 | 7.92E-07 |
| SCART1 | 1.052155 | 1.755965 | 3.58E-07 | 7.93E-07 |
| GALP | 3.045964 | -3.88079 | 3.62E-07 | 8.01E-07 |
| ZP1 | 1.35317 | -1.86036 | 3.64E-07 | 8.06E-07 |
| PRG4 | -1.51156 | 4.796729 | 3.72E-07 | 8.22E-07 |
| NLRP13 | 4.129692 | -2.84975 | 3.75E-07 | 8.29E-07 |
| GLYATL1B | 1.834143 | -2.93558 | 3.86E-07 | 8.53E-07 |
| ANXA8 | -1.42563 | 1.962294 | 3.98E-07 | 8.79E-07 |
| GNG3 | 1.131665 | -2.49741 | 3.99E-07 | 8.80E-07 |
| CNBD1 | 2.977474 | -3.71409 | 4.08E-07 | 9.00E-07 |
| RTN4RL1 | -1.02298 | 2.497268 | 4.11E-07 | 9.07E-07 |
| KIAA2012 | -1.28955 | 0.559999 | 4.14E-07 | 9.13E-07 |
| C4orf50 | 1.319408 | -0.86051 | 4.26E-07 | 9.38E-07 |
| BAAT | 1.73389 | 2.228334 | 4.37E-07 | 9.61E-07 |
| TMEM40 | 1.36078 | 1.175279 | 4.37E-07 | 9.62E-07 |
| NRAP | 1.522386 | -0.93087 | 4.41E-07 | 9.69E-07 |
| GOLGA6L7 | 1.921881 | -2.21711 | 4.41E-07 | 9.69E-07 |
| CFAP206 | -1.19117 | -3.12791 | 4.41E-07 | 9.70E-07 |
| CNDP1 | 1.500235 | -1.79822 | 4.45E-07 | 9.79E-07 |
| EMX2 | 3.78266 | -0.86554 | 4.49E-07 | 9.87E-07 |
| CACNG7 | 3.09586 | -3.21704 | 4.57E-07 | 1.00E-06 |
| FABP12 | -1.69822 | -3.81448 | 4.60E-07 | 1.01E-06 |
| FOXI1 | 3.070974 | -0.5608 | 4.64E-07 | 1.02E-06 |
| AL049629.2 | -1.42225 | -3.36186 | 4.65E-07 | 1.02E-06 |
| ZNF729 | 3.846378 | -2.98032 | 4.67E-07 | 1.02E-06 |
| IFITM5 | 2.331507 | -1.56851 | 4.68E-07 | 1.03E-06 |
| SCNN1G | -1.01186 | 4.230064 | 4.69E-07 | 1.03E-06 |
| ADH1C | 2.171368 | 4.533264 | 4.72E-07 | 1.04E-06 |
| KCNK15 | 1.139086 | 1.307078 | 4.86E-07 | 1.06E-06 |
| HAMP | 1.240551 | 0.96182 | 5.03E-07 | 1.10E-06 |
| KLK13 | 2.270929 | 3.298936 | 5.08E-07 | 1.11E-06 |
| PPP1R27 | 1.473794 | -3.11422 | 5.14E-07 | 1.12E-06 |
| ADRA2A | 1.437354 | 4.231063 | 5.14E-07 | 1.12E-06 |
| SLC28A3 | 1.245267 | 2.686699 | 5.16E-07 | 1.13E-06 |
| GPRC6A | 3.243732 | -2.67272 | 5.20E-07 | 1.14E-06 |
| PCK1 | 3.519003 | 2.032425 | 5.21E-07 | 1.14E-06 |
| RIPPLY3 | 1.442204 | 1.208967 | 5.24E-07 | 1.14E-06 |
| HHLA1 | 3.45658 | -3.17273 | 5.30E-07 | 1.16E-06 |
| NPY | 5.15699 | 2.645626 | 5.47E-07 | 1.19E-06 |
| PCDHB2 | 1.02053 | 2.110107 | 5.47E-07 | 1.19E-06 |
| RBM24 | -1.07602 | 0.096027 | 5.55E-07 | 1.21E-06 |
| ANTXRL | 2.130806 | -2.59874 | 5.57E-07 | 1.21E-06 |
| BTNL8 | -1.33351 | 0.11096 | 5.59E-07 | 1.22E-06 |
| CENPVL3 | 3.593997 | -3.16283 | 5.60E-07 | 1.22E-06 |
| TBC1D3B | 1.257947 | -2.55412 | 5.63E-07 | 1.23E-06 |
| AC118553.2 | 1.146223 | -1.55989 | 5.66E-07 | 1.23E-06 |
| LUZP4 | 3.303772 | -3.77673 | 5.67E-07 | 1.23E-06 |
| AL845331.1 | 1.617263 | -3.11268 | 5.68E-07 | 1.24E-06 |
| HAP1 | 1.454856 | 0.421113 | 5.93E-07 | 1.29E-06 |
| DMP1 | 1.806325 | -2.3647 | 6.00E-07 | 1.30E-06 |
| INS | 4.464443 | -3.1939 | 6.21E-07 | 1.35E-06 |
| INSC | -1.2403 | -0.43114 | 6.21E-07 | 1.35E-06 |
| ENTHD1 | 1.33276 | -1.1926 | 6.27E-07 | 1.36E-06 |
| LAMA1 | 1.507607 | 2.811034 | 6.33E-07 | 1.37E-06 |
| SOX2 | 1.6234 | 4.516249 | 6.33E-07 | 1.37E-06 |
| HHLA2 | 2.275519 | 5.058507 | 6.38E-07 | 1.38E-06 |
| BLID | 3.80671 | -2.83173 | 6.47E-07 | 1.40E-06 |
| SLC27A2 | 1.000382 | 3.803907 | 6.50E-07 | 1.41E-06 |
| AL138752.2 | 3.168427 | -3.61375 | 6.57E-07 | 1.42E-06 |
| HPN | 1.063385 | 5.918028 | 6.58E-07 | 1.42E-06 |
| VSTM5 | 1.18181 | -0.06553 | 6.65E-07 | 1.44E-06 |
| ACKR2 | 1.36724 | 2.711335 | 6.65E-07 | 1.44E-06 |
| TPSD1 | -1.24701 | 1.600074 | 6.68E-07 | 1.44E-06 |
| VWA3A | -1.31663 | 2.064586 | 6.70E-07 | 1.45E-06 |
| KCNK10 | 2.177798 | -0.55224 | 6.84E-07 | 1.48E-06 |
| LRRC31 | 1.648412 | 2.886587 | 6.92E-07 | 1.49E-06 |
| RAD51AP2 | 1.564611 | -2.5767 | 7.08E-07 | 1.52E-06 |
| ITGB3 | 1.137224 | 3.954094 | 7.21E-07 | 1.55E-06 |
| RFPL4B | 3.305932 | -3.15296 | 7.24E-07 | 1.56E-06 |
| GFI1B | -1.07766 | -1.3363 | 7.35E-07 | 1.58E-06 |
| MYOM3 | 1.455324 | 0.20547 | 7.57E-07 | 1.63E-06 |
| PSG2 | 4.649931 | -2.53246 | 7.57E-07 | 1.63E-06 |
| CAGE1 | 1.248683 | -2.3057 | 7.83E-07 | 1.68E-06 |
| EFCAB8 | 1.138588 | -1.88781 | 7.95E-07 | 1.71E-06 |
| NBPF4 | 3.015104 | -2.71915 | 7.95E-07 | 1.71E-06 |
| HDGFL1 | 3.812176 | -3.36833 | 8.00E-07 | 1.72E-06 |
| SLC6A7 | 1.053858 | -1.89006 | 8.00E-07 | 1.72E-06 |
| SAA2 | 1.754622 | 2.138009 | 8.05E-07 | 1.73E-06 |
| SOX1 | 3.706567 | -1.80893 | 8.06E-07 | 1.73E-06 |
| TTR | 3.401657 | 1.228187 | 8.07E-07 | 1.73E-06 |
| EPPIN | -1.43456 | -1.48594 | 8.08E-07 | 1.73E-06 |
| TMDD1 | 1.118383 | -1.90765 | 8.17E-07 | 1.75E-06 |
| OR2B11 | -1.1003 | -2.69879 | 8.19E-07 | 1.75E-06 |
| MAPK4 | -1.41789 | 2.789922 | 8.24E-07 | 1.76E-06 |
| ASB11 | 2.174765 | -0.57784 | 8.24E-07 | 1.76E-06 |
| SCGB2A2 | 4.089235 | -3.28341 | 8.38E-07 | 1.79E-06 |
| CCL28 | 1.042915 | 3.953296 | 8.40E-07 | 1.80E-06 |
| CCNA1 | -1.18027 | 0.77799 | 8.45E-07 | 1.81E-06 |
| CHST6 | 1.204897 | 3.705549 | 8.46E-07 | 1.81E-06 |
| PCP4L1 | 1.495767 | 4.559232 | 8.47E-07 | 1.81E-06 |
| INHBB | 1.095129 | 5.021362 | 8.48E-07 | 1.81E-06 |
| ASCL5 | 1.137486 | 0.162105 | 8.59E-07 | 1.83E-06 |
| CLCNKA | 1.469669 | 0.337798 | 8.68E-07 | 1.85E-06 |
| AC090360.1 | 1.480471 | -0.27037 | 8.83E-07 | 1.88E-06 |
| DLEC1 | -1.04722 | 2.845256 | 8.91E-07 | 1.90E-06 |
| PXT1 | 1.160402 | -2.67793 | 8.92E-07 | 1.90E-06 |
| FAM9B | 2.660127 | -0.91279 | 8.96E-07 | 1.91E-06 |
| TAT | 1.371217 | -0.33763 | 9.01E-07 | 1.92E-06 |
| P2RX3 | 1.20062 | -1.82465 | 9.13E-07 | 1.95E-06 |
| H4C15 | 1.961409 | -3.24759 | 9.16E-07 | 1.95E-06 |
| C11orf53 | 2.678477 | 0.460507 | 9.27E-07 | 1.97E-06 |
| SLURP1 | 2.219407 | -3.49616 | 9.29E-07 | 1.98E-06 |
| TPH2 | 2.551637 | -2.9325 | 9.33E-07 | 1.99E-06 |
| KLB | -1.2739 | 2.526262 | 9.61E-07 | 2.04E-06 |
| DGAT2L6 | 2.593292 | -2.93631 | 9.62E-07 | 2.05E-06 |
| KCNT1 | 1.605936 | 0.438501 | 9.71E-07 | 2.06E-06 |
| UPK2 | 1.69626 | 0.035042 | 9.74E-07 | 2.07E-06 |
| UBD | 1.941194 | -3.75901 | 9.83E-07 | 2.09E-06 |
| GALNTL6 | 1.706399 | 1.289969 | 9.89E-07 | 2.10E-06 |
| NNAT | 1.907619 | 2.186541 | 1.00E-06 | 2.13E-06 |
| CHST9 | -1.54114 | 3.025309 | 1.04E-06 | 2.21E-06 |
| ESX1 | 3.787601 | -3.55552 | 1.04E-06 | 2.21E-06 |
| GBX1 | 2.488639 | -2.6827 | 1.04E-06 | 2.21E-06 |
| SSX3 | 4.155545 | -3.39865 | 1.05E-06 | 2.22E-06 |
| SHISA8 | 1.483438 | -2.21413 | 1.11E-06 | 2.34E-06 |
| TPO | 1.335519 | -0.54001 | 1.16E-06 | 2.44E-06 |
| CALHM3 | 1.816495 | -2.0683 | 1.16E-06 | 2.46E-06 |
| SERPINB7 | 2.500469 | 0.963475 | 1.19E-06 | 2.51E-06 |
| TTLL2 | 1.313243 | -1.09488 | 1.20E-06 | 2.52E-06 |
| APOA4 | 3.533853 | -3.6166 | 1.20E-06 | 2.52E-06 |
| CFAP100 | -1.24969 | 0.872865 | 1.20E-06 | 2.52E-06 |
| C11orf16 | -1.1594 | 1.656658 | 1.20E-06 | 2.53E-06 |
| HORMAD2 | 1.544807 | -1.93906 | 1.20E-06 | 2.53E-06 |
| SCG3 | 2.248419 | 1.979948 | 1.21E-06 | 2.54E-06 |
| CAMKV | 1.917915 | -2.68305 | 1.22E-06 | 2.56E-06 |
| CRLF2 | 1.365985 | -0.80294 | 1.22E-06 | 2.57E-06 |
| PDC | 1.61891 | -2.542 | 1.24E-06 | 2.62E-06 |
| DNAJC5G | 1.786062 | -2.82856 | 1.25E-06 | 2.63E-06 |
| TAC1 | 4.801056 | 2.085567 | 1.26E-06 | 2.65E-06 |
| PDZRN4 | -1.15118 | -0.09806 | 1.27E-06 | 2.67E-06 |
| GFRA4 | 3.821001 | -3.32681 | 1.28E-06 | 2.69E-06 |
| TPPP2 | -1.15048 | -3.79351 | 1.29E-06 | 2.71E-06 |
| OR5K2 | -1.07229 | -3.6479 | 1.29E-06 | 2.71E-06 |
| PZP | -1.21635 | 1.51409 | 1.30E-06 | 2.73E-06 |
| AADAC | -1.33196 | 2.718631 | 1.30E-06 | 2.73E-06 |
| PTPRT | -1.37195 | 2.29099 | 1.30E-06 | 2.74E-06 |
| PDZK1IP1 | 1.072773 | 6.430979 | 1.35E-06 | 2.84E-06 |
| PKLR | 2.147649 | -3.04771 | 1.37E-06 | 2.87E-06 |
| DGCR6 | 2.101806 | 0.189129 | 1.37E-06 | 2.88E-06 |
| SVOP | 2.476453 | -1.93718 | 1.40E-06 | 2.93E-06 |
| TEX35 | 1.895538 | -2.96061 | 1.40E-06 | 2.94E-06 |
| HAO1 | 3.280781 | -2.61883 | 1.42E-06 | 2.97E-06 |
| PNMT | -1.10153 | 0.017665 | 1.47E-06 | 3.07E-06 |
| CCKAR | 3.404877 | -2.45026 | 1.48E-06 | 3.09E-06 |
| BRINP2 | 2.053402 | -0.91709 | 1.49E-06 | 3.12E-06 |
| ZNF80 | 1.187425 | -1.82337 | 1.50E-06 | 3.13E-06 |
| MARCHF11 | 4.301998 | -1.62057 | 1.50E-06 | 3.13E-06 |
| FZD10 | 1.92052 | 2.967817 | 1.50E-06 | 3.14E-06 |
| SARNP | 1.481864 | -1.28305 | 1.50E-06 | 3.14E-06 |
| UCN3 | 2.586626 | 3.571738 | 1.51E-06 | 3.14E-06 |
| ORM1 | 1.775369 | 3.802738 | 1.51E-06 | 3.15E-06 |
| ALDOB | 1.946994 | 1.741358 | 1.53E-06 | 3.20E-06 |
| GPAT2 | 1.454709 | 2.335969 | 1.57E-06 | 3.27E-06 |
| CCL26 | 1.281003 | -0.60869 | 1.59E-06 | 3.32E-06 |
| SLC25A41 | 1.210689 | -1.4604 | 1.62E-06 | 3.38E-06 |
| KLHL34 | 1.490686 | -1.77474 | 1.63E-06 | 3.39E-06 |
| PHF21B | 1.639527 | -1.80875 | 1.66E-06 | 3.45E-06 |
| ANKRD30BL | 2.685219 | -3.63621 | 1.66E-06 | 3.46E-06 |
| RNASE7 | 2.191377 | -1.58598 | 1.68E-06 | 3.50E-06 |
| IL36A | 2.482157 | -3.89797 | 1.69E-06 | 3.51E-06 |
| BBOX1 | 1.544336 | 0.627582 | 1.75E-06 | 3.63E-06 |
| ATCAY | 2.383564 | -2.36297 | 1.76E-06 | 3.65E-06 |
| AL441992.2 | 1.147663 | -3.31751 | 1.77E-06 | 3.68E-06 |
| SLC12A3 | 1.395543 | -0.30267 | 1.78E-06 | 3.68E-06 |
| TNNT2 | 1.34844 | 0.404302 | 1.79E-06 | 3.71E-06 |
| VXN | 1.978073 | -2.6777 | 1.79E-06 | 3.72E-06 |
| KRT36 | 1.207187 | -2.82116 | 1.80E-06 | 3.73E-06 |
| RNF113B | 2.466702 | -2.8507 | 1.84E-06 | 3.80E-06 |
| DUOXA2 | 2.059002 | 1.696748 | 1.84E-06 | 3.81E-06 |
| CD1A | 1.571123 | 3.375445 | 1.86E-06 | 3.86E-06 |
| RHOXF2B | 3.610277 | -3.77731 | 1.89E-06 | 3.91E-06 |
| SPRR2A | 3.346452 | 0.478969 | 1.89E-06 | 3.91E-06 |
| CT55 | 2.508602 | -2.80346 | 1.94E-06 | 4.00E-06 |
| OR2AG1 | 2.884318 | -3.08971 | 1.94E-06 | 4.02E-06 |
| AC004922.1 | 1.385046 | -2.92499 | 1.98E-06 | 4.09E-06 |
| SERPINA11 | 2.944611 | -2.0753 | 2.01E-06 | 4.14E-06 |
| INHBC | 1.132885 | -2.01282 | 2.03E-06 | 4.18E-06 |
| TAF11L12 | 3.26461 | -3.92946 | 2.05E-06 | 4.23E-06 |
| COL28A1 | 1.217773 | 3.217656 | 2.05E-06 | 4.24E-06 |
| PVALEF | 1.955502 | -3.73086 | 2.06E-06 | 4.24E-06 |
| PNLIPRP3 | 3.267586 | -1.99522 | 2.08E-06 | 4.30E-06 |
| STYXL2 | -1.46057 | -0.62726 | 2.09E-06 | 4.30E-06 |
| F2RL2 | 1.289416 | 1.587901 | 2.10E-06 | 4.32E-06 |
| AMPH | 1.287463 | 1.565872 | 2.13E-06 | 4.39E-06 |
| PRSS12 | -1.01679 | 3.024814 | 2.15E-06 | 4.43E-06 |
| FRG2C | 2.195894 | -3.18163 | 2.17E-06 | 4.47E-06 |
| PAX3 | 2.603684 | -2.66148 | 2.23E-06 | 4.59E-06 |
| ESPNL | 1.190366 | 0.964603 | 2.29E-06 | 4.71E-06 |
| LPA | -1.39455 | -2.6665 | 2.30E-06 | 4.72E-06 |
| FAM71D | 1.184056 | -1.72627 | 2.32E-06 | 4.77E-06 |
| ARID3C | 1.26148 | -2.66298 | 2.37E-06 | 4.85E-06 |
| CDH12 | 2.537773 | -0.7394 | 2.37E-06 | 4.86E-06 |
| FOXN4 | 2.336231 | -0.59323 | 2.39E-06 | 4.90E-06 |
| FAM187B | -1.0873 | -3.63482 | 2.40E-06 | 4.91E-06 |
| AKAP12 | -1.00007 | 6.343918 | 2.40E-06 | 4.92E-06 |
| SIX6 | 2.382509 | -3.66309 | 2.40E-06 | 4.92E-06 |
| SLC16A1 | 1.055504 | 4.857537 | 2.44E-06 | 5.00E-06 |
| TTLL9 | -1.00796 | 0.712261 | 2.44E-06 | 5.00E-06 |
| ZNF679 | 3.87145 | -3.3035 | 2.45E-06 | 5.02E-06 |
| OR1J4 | 2.113745 | -3.66206 | 2.50E-06 | 5.10E-06 |
| GALNTL5 | 2.521026 | -3.85991 | 2.50E-06 | 5.12E-06 |
| GABRE | 1.139239 | 4.875844 | 2.54E-06 | 5.18E-06 |
| ALPP | -1.36752 | 1.599366 | 2.58E-06 | 5.28E-06 |
| KCNJ1 | 1.668844 | 0.087426 | 2.61E-06 | 5.32E-06 |
| GNG13 | 1.43828 | -2.70956 | 2.61E-06 | 5.33E-06 |
| LAIR2 | 1.55755 | 0.709682 | 2.74E-06 | 5.59E-06 |
| IDO2 | 1.041012 | -0.42002 | 2.75E-06 | 5.60E-06 |
| DNAJB13 | 1.080143 | 1.228387 | 2.82E-06 | 5.74E-06 |
| CYP1A1 | -1.94682 | 2.085584 | 2.85E-06 | 5.81E-06 |
| ANXA13 | 2.174975 | 1.071804 | 2.86E-06 | 5.83E-06 |
| AC087632.2 | 1.730709 | -2.86854 | 2.91E-06 | 5.91E-06 |
| TNNT3 | -1.19553 | -0.08602 | 2.91E-06 | 5.93E-06 |
| SLPI | -1.05613 | 9.011485 | 2.93E-06 | 5.95E-06 |
| HOXD1 | 1.459582 | 1.09103 | 2.94E-06 | 5.98E-06 |
| CLCN1 | 1.507731 | -1.47765 | 2.96E-06 | 6.02E-06 |
| MDGA2 | 2.89017 | -1.46783 | 3.05E-06 | 6.20E-06 |
| IGSF9B | 1.24676 | 4.090802 | 3.11E-06 | 6.32E-06 |
| TAS2R46 | 2.720048 | -2.80965 | 3.13E-06 | 6.36E-06 |
| CAPZA3 | 2.588619 | -3.48223 | 3.15E-06 | 6.40E-06 |
| ZFR2 | 1.970824 | 0.838277 | 3.20E-06 | 6.49E-06 |
| NKAIN2 | 2.05706 | -0.43371 | 3.24E-06 | 6.57E-06 |
| WFDC13 | 1.468141 | -0.86838 | 3.25E-06 | 6.59E-06 |
| KRT9 | 2.697949 | -3.48724 | 3.26E-06 | 6.60E-06 |
| LYNX1-SLURP2 | 1.465552 | -2.8229 | 3.31E-06 | 6.69E-06 |
| FCAR | -1.02242 | 0.112066 | 3.33E-06 | 6.74E-06 |
| TSPY1 | 3.747238 | -3.68808 | 3.37E-06 | 6.81E-06 |
| ABCB11 | 1.363483 | -1.35389 | 3.38E-06 | 6.83E-06 |
| OPRM1 | 1.994499 | -3.27589 | 3.44E-06 | 6.95E-06 |
| GPR26 | 3.390883 | -0.60689 | 3.45E-06 | 6.98E-06 |
| SATL1 | 1.754966 | -3.29051 | 3.47E-06 | 7.00E-06 |
| TMPRSS11F | 2.453638 | -3.63441 | 3.48E-06 | 7.03E-06 |
| LYPD4 | 2.883679 | -3.3511 | 3.48E-06 | 7.03E-06 |
| ASIC3 | 1.003147 | 1.269461 | 3.54E-06 | 7.14E-06 |
| ZNF750 | 1.125397 | 3.974798 | 3.57E-06 | 7.19E-06 |
| TENM3 | 1.023719 | 2.930113 | 3.60E-06 | 7.26E-06 |
| AQP12B | 3.189464 | -3.66781 | 3.61E-06 | 7.28E-06 |
| PABPC1L2B | 3.416138 | -3.35393 | 3.62E-06 | 7.30E-06 |
| CYP2C18 | 1.564756 | 1.634135 | 3.63E-06 | 7.31E-06 |
| CDH20 | 1.568256 | -0.46721 | 3.63E-06 | 7.32E-06 |
| PRB2 | 3.049484 | -3.60813 | 3.69E-06 | 7.43E-06 |
| TAS2R19 | 1.366983 | -1.52487 | 3.74E-06 | 7.53E-06 |
| TMEM270 | 1.313809 | -0.93281 | 3.75E-06 | 7.55E-06 |
| CPN2 | 1.57519 | -2.22878 | 3.82E-06 | 7.68E-06 |
| KRTAP29-1 | 2.312402 | -3.51732 | 3.83E-06 | 7.71E-06 |
| MAT1A | 1.419897 | 1.683458 | 3.85E-06 | 7.73E-06 |
| POU5F1 | 1.224776 | 1.811953 | 3.86E-06 | 7.75E-06 |
| CA2 | -1.02223 | 5.416492 | 4.03E-06 | 8.08E-06 |
| NBPF6 | 2.812653 | -3.38273 | 4.04E-06 | 8.11E-06 |
| NCR2 | 1.504531 | -3.54967 | 4.06E-06 | 8.14E-06 |
| OR4A16 | 3.634095 | -3.74322 | 4.14E-06 | 8.31E-06 |
| AL121758.1 | 1.403423 | -3.01507 | 4.25E-06 | 8.51E-06 |
| CRIP3 | 1.287232 | -1.26611 | 4.25E-06 | 8.52E-06 |
| IFNB1 | 1.821155 | -3.86136 | 4.30E-06 | 8.60E-06 |
| CDC20B | 2.075052 | 1.549874 | 4.31E-06 | 8.62E-06 |
| SLC15A5 | 1.983118 | -2.51958 | 4.35E-06 | 8.70E-06 |
| CCDC196 | 1.875107 | -2.21676 | 4.35E-06 | 8.71E-06 |
| IFNG | 1.289474 | 0.091749 | 4.42E-06 | 8.84E-06 |
| CYP2W1 | 1.878702 | -0.62828 | 4.51E-06 | 9.01E-06 |
| NTN3 | 1.234492 | -2.17666 | 4.53E-06 | 9.05E-06 |
| KIR2DL3 | -1.23189 | -2.18374 | 4.57E-06 | 9.12E-06 |
| ITLN1 | -1.85578 | 5.316508 | 4.57E-06 | 9.13E-06 |
| PAX2 | 2.893161 | -2.27715 | 4.58E-06 | 9.14E-06 |
| HSD17B2 | 1.754293 | 2.438371 | 4.59E-06 | 9.16E-06 |
| TMEM72 | 1.406533 | -0.98789 | 4.60E-06 | 9.18E-06 |
| TTLL6 | -1.04661 | 0.621158 | 4.63E-06 | 9.24E-06 |
| CRHR2 | 1.505628 | 0.27424 | 4.65E-06 | 9.26E-06 |
| OPRK1 | 2.119679 | 0.587301 | 4.67E-06 | 9.30E-06 |
| C1QTNF3 | 1.039082 | 3.19386 | 4.68E-06 | 9.33E-06 |
| PSD2 | 1.271581 | -1.38061 | 4.70E-06 | 9.36E-06 |
| PCSK2 | 3.001904 | 6.459562 | 4.70E-06 | 9.36E-06 |
| PCDHA11 | 1.0556 | 1.210517 | 4.72E-06 | 9.40E-06 |
| KRT40 | 2.213548 | 0.738201 | 4.74E-06 | 9.44E-06 |
| DAW1 | -1.0515 | 1.945953 | 4.80E-06 | 9.56E-06 |
| AC068946.2 | 1.394884 | -3.42307 | 4.88E-06 | 9.71E-06 |
| NEUROG3 | 2.368158 | -1.69397 | 4.89E-06 | 9.72E-06 |
| SCRT1 | 1.257107 | -2.72883 | 4.93E-06 | 9.79E-06 |
| IRX1 | -1.32888 | 1.320162 | 4.94E-06 | 9.81E-06 |
| ZNF536 | -1.3077 | -1.72663 | 4.97E-06 | 9.88E-06 |
| SPATA31D1 | 3.142489 | -3.87749 | 4.99E-06 | 9.92E-06 |
| ERICH5 | 1.244528 | 2.465848 | 5.00E-06 | 9.94E-06 |
| IFNK | 3.48019 | -2.31708 | 5.07E-06 | 1.01E-05 |
| COL20A1 | 1.820746 | -2.86856 | 5.11E-06 | 1.01E-05 |
| CTNNA2 | 2.189499 | -0.90004 | 5.18E-06 | 1.03E-05 |
| GPR158 | 1.632121 | 1.212673 | 5.47E-06 | 1.08E-05 |
| HOXB1 | 2.622298 | -2.27317 | 5.52E-06 | 1.09E-05 |
| OTOGL | 1.305786 | -0.27032 | 5.52E-06 | 1.09E-05 |
| DMRT3 | 1.881932 | -0.8995 | 5.54E-06 | 1.10E-05 |
| SLC30A3 | 1.311449 | 0.118937 | 5.57E-06 | 1.10E-05 |
| PLA2G10 | 1.329003 | 2.619976 | 5.58E-06 | 1.10E-05 |
| SHISA3 | 1.933852 | 4.79468 | 5.63E-06 | 1.11E-05 |
| GPR12 | 2.373114 | -0.95082 | 5.74E-06 | 1.13E-05 |
| TLE7 | 3.74178 | -3.18394 | 5.80E-06 | 1.15E-05 |
| XKR7 | 2.71063 | -0.02015 | 5.89E-06 | 1.16E-05 |
| ARX | 1.65428 | 2.079975 | 5.92E-06 | 1.17E-05 |
| IYD | 1.417354 | 3.886823 | 5.93E-06 | 1.17E-05 |
| MAGEB17 | 2.317288 | -2.43636 | 5.94E-06 | 1.17E-05 |
| GAGE12J | 3.326027 | -3.89143 | 5.96E-06 | 1.18E-05 |
| ERAS | 1.249953 | -2.91289 | 6.05E-06 | 1.19E-05 |
| CLEC18B | 1.101689 | -2.06748 | 6.17E-06 | 1.22E-05 |
| NEURL1 | 1.458768 | 1.907507 | 6.22E-06 | 1.22E-05 |
| IL17A | 2.035298 | -3.15785 | 6.29E-06 | 1.24E-05 |
| APOC3 | 4.034675 | -1.42281 | 6.36E-06 | 1.25E-05 |
| CRCT1 | 3.667169 | -2.27337 | 6.48E-06 | 1.27E-05 |
| IGSF23 | 1.356634 | -2.44754 | 6.53E-06 | 1.28E-05 |
| LINGO2 | 1.84214 | -1.1133 | 6.61E-06 | 1.30E-05 |
| HOXC5 | 1.602461 | -3.07672 | 6.62E-06 | 1.30E-05 |
| MUC22 | 1.585741 | 0.279469 | 6.67E-06 | 1.31E-05 |
| CABP4 | 1.013353 | 2.398677 | 6.67E-06 | 1.31E-05 |
| KNCN | -1.39572 | -3.65163 | 6.73E-06 | 1.32E-05 |
| MMP28 | -1.02916 | 5.369185 | 6.74E-06 | 1.32E-05 |
| SPATA21 | 1.980185 | -2.10941 | 6.83E-06 | 1.34E-05 |
| CLDN24 | -1.32247 | -3.5817 | 6.87E-06 | 1.35E-05 |
| PRND | -1.09545 | 0.523236 | 6.87E-06 | 1.35E-05 |
| CLEC3A | 3.034107 | -2.68127 | 6.96E-06 | 1.36E-05 |
| NOVA1 | 1.253253 | 2.34929 | 7.02E-06 | 1.37E-05 |
| CDH7 | 2.149695 | -0.77382 | 7.03E-06 | 1.38E-05 |
| BEST3 | 1.972383 | -2.08359 | 7.05E-06 | 1.38E-05 |
| CFAP47 | -1.19923 | 0.966221 | 7.11E-06 | 1.39E-05 |
| KRT39 | 1.284892 | -1.73363 | 7.53E-06 | 1.47E-05 |
| WNT1 | 1.132368 | -1.29321 | 7.53E-06 | 1.47E-05 |
| PIK3C2G | 2.160756 | 2.156018 | 7.64E-06 | 1.49E-05 |
| ADGRF2 | 1.765839 | -0.2906 | 8.06E-06 | 1.57E-05 |
| H3C14 | 1.862073 | -2.21024 | 8.11E-06 | 1.58E-05 |
| STAR | 1.463472 | 0.06565 | 8.23E-06 | 1.60E-05 |
| BTBD17 | 2.517522 | -2.822 | 8.28E-06 | 1.61E-05 |
| RNF151 | 1.179539 | -3.5238 | 8.30E-06 | 1.61E-05 |
| TSPAN19 | -1.43554 | 1.214278 | 8.33E-06 | 1.62E-05 |
| ZNF722P | 3.675961 | -3.12764 | 8.37E-06 | 1.63E-05 |
| DUOX2 | 1.706208 | 4.633976 | 8.37E-06 | 1.63E-05 |
| OPTC | 2.156794 | -3.75453 | 8.41E-06 | 1.63E-05 |
| TMEM89 | 1.291351 | -3.21232 | 8.47E-06 | 1.65E-05 |
| NLRP8 | 2.744907 | -3.24331 | 8.58E-06 | 1.67E-05 |
| OR7A5 | 2.264747 | -3.39316 | 8.70E-06 | 1.69E-05 |
| SLC22A14 | 1.184083 | -2.49935 | 8.88E-06 | 1.72E-05 |
| UGT1A3 | 2.839235 | -3.93239 | 8.96E-06 | 1.74E-05 |
| RHBDL3 | 1.149192 | 0.304582 | 9.01E-06 | 1.74E-05 |
| KCNH7 | 1.511415 | -1.55182 | 9.07E-06 | 1.76E-05 |
| SEZ6 | 1.982222 | 0.301983 | 9.13E-06 | 1.77E-05 |
| AKAIN1 | 2.633935 | -2.93698 | 9.14E-06 | 1.77E-05 |
| RPTN | 3.111198 | -2.53822 | 9.18E-06 | 1.78E-05 |
| CCL19 | 1.114151 | 4.629181 | 9.19E-06 | 1.78E-05 |
| AMER3 | 2.751119 | -2.22938 | 9.21E-06 | 1.78E-05 |
| PCDHA4 | 1.209928 | 1.108468 | 9.23E-06 | 1.78E-05 |
| SPACA3 | 1.558755 | -1.8915 | 9.25E-06 | 1.79E-05 |
| CEACAM18 | 3.971744 | -3.13275 | 9.26E-06 | 1.79E-05 |
| C12orf40 | 2.520337 | -3.04492 | 9.27E-06 | 1.79E-05 |
| HJV | 1.568986 | -2.79124 | 9.28E-06 | 1.79E-05 |
| SYTL5 | 1.234896 | 2.73166 | 9.46E-06 | 1.83E-05 |
| PRSS48 | 2.637377 | -1.98931 | 9.48E-06 | 1.83E-05 |
| TRIM43 | 2.900433 | -3.85824 | 9.51E-06 | 1.83E-05 |
| PLCXD3 | -1.01825 | 2.153102 | 9.57E-06 | 1.85E-05 |
| PIWIL2 | 1.401597 | 0.049735 | 9.58E-06 | 1.85E-05 |
| TLX3 | 3.1174 | -3.3305 | 9.63E-06 | 1.86E-05 |
| LINC00514 | 1.116723 | 0.351048 | 9.63E-06 | 1.86E-05 |
| PRH1 | 1.087835 | -0.55484 | 9.67E-06 | 1.86E-05 |
| TSPY2 | 3.941379 | -3.46241 | 9.90E-06 | 1.91E-05 |
| TUNAR | 3.907009 | -1.1753 | 9.96E-06 | 1.92E-05 |
| KCNJ16 | -1.18232 | 0.780023 | 9.98E-06 | 1.92E-05 |
| ACOT12 | 2.403955 | -3.42096 | 1.00E-05 | 1.92E-05 |
| DCAF12L1 | 2.986452 | -1.99416 | 1.01E-05 | 1.94E-05 |
| C5orf58 | 1.026498 | -0.78603 | 1.04E-05 | 1.99E-05 |
| SNTG2 | -1.05203 | -2.00684 | 1.04E-05 | 2.00E-05 |
| AHRR | 1.29306 | -1.78997 | 1.04E-05 | 2.00E-05 |
| REG1B | 3.547378 | -3.54 | 1.05E-05 | 2.02E-05 |
| BAMBI | 1.128162 | 4.786952 | 1.07E-05 | 2.05E-05 |
| CCL20 | 1.340782 | 5.341121 | 1.07E-05 | 2.06E-05 |
| BMX | -1.05789 | 1.471626 | 1.08E-05 | 2.08E-05 |
| ZNF723 | 3.077005 | -2.81506 | 1.09E-05 | 2.10E-05 |
| UMOD | -2.20456 | -2.45689 | 1.12E-05 | 2.15E-05 |
| SPRR2F | 2.881538 | -0.4718 | 1.14E-05 | 2.18E-05 |
| KYNU | 1.218346 | 5.549122 | 1.15E-05 | 2.20E-05 |
| CLCA4 | 2.140393 | -0.70564 | 1.16E-05 | 2.21E-05 |
| KCTD4 | 2.601977 | -2.18147 | 1.17E-05 | 2.23E-05 |
| C8A | 2.341669 | 0.392882 | 1.20E-05 | 2.29E-05 |
| MYOD1 | 3.238033 | -3.77313 | 1.20E-05 | 2.29E-05 |
| MAGEA2B | 2.822003 | -3.79876 | 1.21E-05 | 2.31E-05 |
| NXPE1 | 2.03307 | -2.97424 | 1.21E-05 | 2.31E-05 |
| NEURL3 | 1.077469 | 0.310502 | 1.23E-05 | 2.35E-05 |
| SRXN1 | 1.408255 | -2.97849 | 1.24E-05 | 2.37E-05 |
| SPINK5 | 1.460675 | 4.922816 | 1.24E-05 | 2.37E-05 |
| MEI4 | 2.189355 | -1.27462 | 1.24E-05 | 2.37E-05 |
| TRPC5 | 2.340109 | -2.86844 | 1.24E-05 | 2.38E-05 |
| TENT5D | 2.014636 | -3.78645 | 1.27E-05 | 2.42E-05 |
| DDC | 1.856926 | 3.489912 | 1.27E-05 | 2.43E-05 |
| NDST4 | 2.935302 | -2.37893 | 1.29E-05 | 2.45E-05 |
| HSD3B1 | 3.297309 | -2.57477 | 1.29E-05 | 2.46E-05 |
| NPPB | 2.752778 | -2.96887 | 1.31E-05 | 2.49E-05 |
| SLC51B | -1.00374 | 1.676334 | 1.33E-05 | 2.54E-05 |
| OR51B5 | 2.006521 | -1.76543 | 1.34E-05 | 2.54E-05 |
| TMEM244 | 1.413241 | -3.62812 | 1.36E-05 | 2.59E-05 |
| ADORA1 | 1.109549 | 3.396308 | 1.38E-05 | 2.62E-05 |
| VCX3B | 2.351776 | -2.825 | 1.38E-05 | 2.62E-05 |
| KCNJ4 | 2.035623 | -3.56712 | 1.41E-05 | 2.67E-05 |
| DIO1 | 1.479787 | 1.208887 | 1.41E-05 | 2.67E-05 |
| CPE | 1.011745 | 7.426006 | 1.42E-05 | 2.70E-05 |
| DPPA5 | 3.603908 | -2.73684 | 1.42E-05 | 2.70E-05 |
| EDDM3B | 2.734575 | -3.17119 | 1.44E-05 | 2.73E-05 |
| KLRC2 | 1.558328 | -1.1151 | 1.44E-05 | 2.74E-05 |
| PRODH2 | 3.843573 | -1.7337 | 1.47E-05 | 2.79E-05 |
| FBN3 | -1.15297 | 2.588916 | 1.47E-05 | 2.79E-05 |
| TCERG1L | 2.023829 | -0.96455 | 1.49E-05 | 2.83E-05 |
| PYY | 1.174696 | -1.67182 | 1.53E-05 | 2.90E-05 |
| GRIK3 | 1.796276 | 0.772188 | 1.54E-05 | 2.91E-05 |
| ZNF460 | 1.1238 | 2.111472 | 1.55E-05 | 2.93E-05 |
| ZP2 | 2.563565 | -0.70916 | 1.55E-05 | 2.93E-05 |
| TRIM40 | 2.34375 | -2.13506 | 1.58E-05 | 2.99E-05 |
| DSC1 | 1.476402 | -3.25861 | 1.59E-05 | 3.00E-05 |
| AQP5 | 1.725224 | 6.293263 | 1.60E-05 | 3.03E-05 |
| H2BW1 | 2.894986 | -3.80982 | 1.62E-05 | 3.06E-05 |
| AMBN | 2.397097 | -3.6452 | 1.64E-05 | 3.09E-05 |
| NPIPB6 | 1.045633 | -2.49429 | 1.64E-05 | 3.10E-05 |
| FCRLA | 1.106586 | 2.271217 | 1.64E-05 | 3.10E-05 |
| ELAPOR1 | 1.20503 | 6.941486 | 1.66E-05 | 3.12E-05 |
| C1QTNF9B | 1.814825 | -3.35455 | 1.67E-05 | 3.15E-05 |
| SLC2A14 | 1.14579 | -0.21327 | 1.69E-05 | 3.17E-05 |
| LHFPL1 | 1.175019 | -1.92299 | 1.72E-05 | 3.23E-05 |
| FDX2 | 1.125407 | -3.77118 | 1.72E-05 | 3.24E-05 |
| PRSS51 | 1.251593 | -0.37865 | 1.73E-05 | 3.26E-05 |
| HTR2C | 2.912333 | -0.49212 | 1.75E-05 | 3.28E-05 |
| GKN1 | 3.654299 | -1.81239 | 1.76E-05 | 3.31E-05 |
| PAPPA | 1.049526 | 2.839365 | 1.76E-05 | 3.31E-05 |
| SMIM18 | 1.754826 | -2.5991 | 1.77E-05 | 3.32E-05 |
| SHISA9 | 2.55769 | -0.0004 | 1.78E-05 | 3.34E-05 |
| TAS1R1 | 1.423793 | 0.310324 | 1.78E-05 | 3.35E-05 |
| CT47B1 | 3.277458 | -3.86668 | 1.80E-05 | 3.39E-05 |
| ALDH3A1 | 1.903346 | 6.101842 | 1.81E-05 | 3.39E-05 |
| SPHKAP | -1.54688 | -1.90891 | 1.83E-05 | 3.43E-05 |
| FCER2 | -1.01193 | 0.607071 | 1.83E-05 | 3.44E-05 |
| UNC5D | 2.54354 | 0.902921 | 1.89E-05 | 3.54E-05 |
| GRIN2C | 1.082289 | 0.977585 | 1.95E-05 | 3.66E-05 |
| ALDH1L1 | 1.254018 | 2.340161 | 1.96E-05 | 3.68E-05 |
| GNAT3 | 3.412294 | -3.07134 | 2.00E-05 | 3.73E-05 |
| STK32B | 1.097281 | 2.481929 | 2.00E-05 | 3.73E-05 |
| BOLA2-SMG1P6 | 1.044571 | -3.68145 | 2.00E-05 | 3.74E-05 |
| TKTL2 | 1.771693 | -3.44462 | 2.01E-05 | 3.75E-05 |
| BPIFC | 1.860964 | -3.56329 | 2.01E-05 | 3.76E-05 |
| PRSS38 | 2.902504 | -3.71497 | 2.08E-05 | 3.88E-05 |
| PSORS1C2 | 1.638017 | -1.52828 | 2.09E-05 | 3.90E-05 |
| WFDC5 | 3.371179 | 1.693202 | 2.11E-05 | 3.93E-05 |
| MYL2 | 1.902419 | -2.82667 | 2.13E-05 | 3.97E-05 |
| NPIPB15 | 1.339186 | 1.718433 | 2.15E-05 | 4.00E-05 |
| PNLIPRP1 | 1.949545 | -3.43689 | 2.15E-05 | 4.00E-05 |
| S100A7A | 3.435965 | -1.51718 | 2.15E-05 | 4.00E-05 |
| SMIM33 | 1.633628 | -1.48296 | 2.19E-05 | 4.07E-05 |
| DNTT | 1.676502 | -3.75365 | 2.23E-05 | 4.14E-05 |
| UCP1 | -1.07602 | -3.56624 | 2.23E-05 | 4.15E-05 |
| SLC6A18 | 2.257962 | -3.01685 | 2.25E-05 | 4.18E-05 |
| CASP14 | 3.778816 | 1.151096 | 2.31E-05 | 4.29E-05 |
| TRH | -1.22128 | -1.90563 | 2.37E-05 | 4.40E-05 |
| SLC34A1 | 1.149839 | -2.50492 | 2.40E-05 | 4.45E-05 |
| GSG1L2 | 3.356964 | -3.77269 | 2.42E-05 | 4.48E-05 |
| PLA2G2D | 1.15959 | 3.460054 | 2.42E-05 | 4.49E-05 |
| REG3A | 3.962726 | -2.6745 | 2.45E-05 | 4.55E-05 |
| CCKBR | 2.0249 | -1.8786 | 2.46E-05 | 4.56E-05 |
| TAAR1 | 2.697745 | -3.24359 | 2.49E-05 | 4.61E-05 |
| SLC25A2 | 1.188104 | -3.03017 | 2.53E-05 | 4.68E-05 |
| HTR1A | 2.776241 | -3.51383 | 2.57E-05 | 4.76E-05 |
| ZNF257 | 1.048651 | 1.159247 | 2.60E-05 | 4.82E-05 |
| MRGPRX3 | 2.302365 | -3.48247 | 2.61E-05 | 4.83E-05 |
| KRT6C | 2.45815 | -0.45412 | 2.65E-05 | 4.90E-05 |
| ITIH1 | 1.314061 | -1.73075 | 2.66E-05 | 4.92E-05 |
| GABRA4 | -1.57061 | -3.25841 | 2.67E-05 | 4.93E-05 |
| TSPY3 | 3.111104 | -3.94632 | 2.72E-05 | 5.03E-05 |
| TXNDC2 | 1.267686 | -1.97974 | 2.76E-05 | 5.10E-05 |
| FAM95C | 1.02931 | -0.14396 | 2.79E-05 | 5.14E-05 |
| NXPE2 | 1.533288 | -2.88098 | 2.81E-05 | 5.19E-05 |
| CYP8B1 | 1.250621 | -0.92852 | 2.82E-05 | 5.20E-05 |
| H2BS1 | 1.859798 | -3.76709 | 2.83E-05 | 5.21E-05 |
| GGTLC1 | -1.10926 | 4.390807 | 2.83E-05 | 5.22E-05 |
| OR14A16 | 3.856101 | -3.59159 | 2.91E-05 | 5.36E-05 |
| KRT37 | 2.399594 | -3.87907 | 2.92E-05 | 5.37E-05 |
| PROM1 | 1.467984 | 5.154283 | 2.92E-05 | 5.37E-05 |
| SLC17A2 | 3.089515 | -3.5722 | 2.92E-05 | 5.38E-05 |
| OR2H2 | 1.535268 | -3.34999 | 2.94E-05 | 5.41E-05 |
| NAT8 | -1.06054 | -3.53857 | 2.96E-05 | 5.45E-05 |
| VTN | 1.944603 | 3.262865 | 2.97E-05 | 5.46E-05 |
| NEFM | 2.142326 | -0.30763 | 3.01E-05 | 5.54E-05 |
| AC006978.2 | 1.483253 | -3.54808 | 3.03E-05 | 5.57E-05 |
| CD207 | 1.432197 | 3.75024 | 3.04E-05 | 5.58E-05 |
| SNCB | 1.299977 | -2.55669 | 3.08E-05 | 5.65E-05 |
| OR9A4 | 2.349507 | -3.32842 | 3.09E-05 | 5.67E-05 |
| CACNA1A | 1.118603 | 1.591074 | 3.13E-05 | 5.74E-05 |
| LGALS9C | 1.43464 | -0.08812 | 3.18E-05 | 5.83E-05 |
| UBE2U | 2.185051 | -2.15255 | 3.22E-05 | 5.90E-05 |
| CES3 | 1.127484 | 3.026059 | 3.27E-05 | 5.98E-05 |
| AC134669.1 | 2.577829 | -3.56781 | 3.27E-05 | 5.98E-05 |
| DEFB1 | 1.609868 | 3.010759 | 3.27E-05 | 5.98E-05 |
| LGALS14 | 3.290615 | -3.02928 | 3.30E-05 | 6.04E-05 |
| POTEF | 1.186837 | -2.26236 | 3.38E-05 | 6.17E-05 |
| CPHXL | 2.128734 | -3.22288 | 3.39E-05 | 6.20E-05 |
| TBC1D3L | 1.028186 | 0.935576 | 3.50E-05 | 6.39E-05 |
| UPK1B | 2.665415 | 3.576324 | 3.52E-05 | 6.43E-05 |
| TSBP1 | 1.902531 | -2.40375 | 3.55E-05 | 6.47E-05 |
| DSG1 | 1.964372 | -1.81896 | 3.57E-05 | 6.51E-05 |
| CTXN3 | 2.277161 | -3.32526 | 3.60E-05 | 6.55E-05 |
| UGT2B4 | 2.103211 | 2.147982 | 3.62E-05 | 6.59E-05 |
| SMIM32 | 2.092916 | -2.20114 | 3.70E-05 | 6.73E-05 |
| VPREB3 | 1.010816 | 0.96078 | 3.73E-05 | 6.78E-05 |
| C19orf67 | 1.053741 | -2.70852 | 3.74E-05 | 6.81E-05 |
| WFDC6 | -1.39823 | -3.46188 | 3.79E-05 | 6.89E-05 |
| HHATL | 2.236929 | 0.509492 | 3.95E-05 | 7.17E-05 |
| TFAP2B | 2.799047 | 0.511448 | 4.02E-05 | 7.28E-05 |
| AC008397.1 | 1.671127 | -2.81263 | 4.03E-05 | 7.31E-05 |
| TNMD | 2.727724 | -0.39688 | 4.09E-05 | 7.42E-05 |
| TSPYL6 | 2.26067 | -2.3369 | 4.17E-05 | 7.55E-05 |
| AGXT2 | 2.383098 | -2.48992 | 4.24E-05 | 7.68E-05 |
| GRIN2A | 1.676452 | 1.489702 | 4.24E-05 | 7.69E-05 |
| SPINK8 | 2.104266 | -3.55224 | 4.28E-05 | 7.75E-05 |
| AL133353.2 | 2.013549 | -3.72939 | 4.38E-05 | 7.91E-05 |
| SSX5 | 3.48492 | -1.19218 | 4.43E-05 | 8.00E-05 |
| ZNF559-ZNF177 | 1.015617 | -2.05825 | 4.49E-05 | 8.11E-05 |
| GLRA4 | 2.146757 | -2.00659 | 4.50E-05 | 8.13E-05 |
| KRT12 | 1.276025 | -2.39661 | 4.52E-05 | 8.17E-05 |
| ZNF492 | 1.363754 | -0.97896 | 4.55E-05 | 8.22E-05 |
| TAF11L11 | 3.266012 | -3.39731 | 4.56E-05 | 8.23E-05 |
| KRT38 | 2.482179 | -3.12705 | 4.57E-05 | 8.24E-05 |
| HOXB6 | 1.032487 | 1.882541 | 4.57E-05 | 8.24E-05 |
| TAS2R50 | 2.064564 | -2.86926 | 4.63E-05 | 8.35E-05 |
| TMEM196 | 2.945704 | -2.50183 | 4.70E-05 | 8.47E-05 |
| NIPAL4 | 1.268107 | 0.472578 | 4.93E-05 | 8.86E-05 |
| SHD | 1.130458 | -2.23237 | 5.01E-05 | 9.00E-05 |
| ADAMTS19 | 2.596906 | -0.62389 | 5.09E-05 | 9.14E-05 |
| FEZF2 | 2.552517 | -3.86491 | 5.28E-05 | 9.46E-05 |
| CATSPER4 | 1.361207 | -3.55563 | 5.31E-05 | 9.51E-05 |
| KCNIP4 | 1.051921 | -1.61523 | 5.31E-05 | 9.53E-05 |
| SERPINB13 | 2.628993 | 0.178549 | 5.32E-05 | 9.54E-05 |
| AXDND1 | 1.115794 | -1.60541 | 5.43E-05 | 9.72E-05 |
| GPR83 | 1.010085 | -1.49052 | 5.56E-05 | 9.95E-05 |
| KIF4B | 1.019105 | -3.44293 | 5.60E-05 | 0.0001 |
| C11orf98 | 1.125373 | -3.85303 | 5.62E-05 | 0.000101 |
| LTF | 1.283166 | 7.016624 | 5.65E-05 | 0.000101 |
| SBK2 | 1.770424 | -1.44751 | 5.78E-05 | 0.000103 |
| C1QTNF3-AMACR | 1.068079 | -3.35954 | 5.96E-05 | 0.000106 |
| SELENOV | 2.270539 | -3.68331 | 6.14E-05 | 0.000109 |
| ZNF208 | 1.122352 | 0.671312 | 6.29E-05 | 0.000112 |
| GAPDHS | 1.46171 | -3.74004 | 6.34E-05 | 0.000113 |
| KIR2DL4 | 1.14763 | -0.20797 | 6.40E-05 | 0.000114 |
| PROX1 | 1.023775 | 3.274938 | 6.48E-05 | 0.000115 |
| TAS2R31 | 1.173435 | -1.70315 | 6.64E-05 | 0.000118 |
| AC098650.1 | 1.753456 | -1.4787 | 6.66E-05 | 0.000118 |
| MYO16 | 1.038058 | 1.249394 | 6.92E-05 | 0.000123 |
| CLVS2 | 3.164668 | -1.77936 | 6.92E-05 | 0.000123 |
| TBX20 | 2.036403 | -2.50693 | 6.97E-05 | 0.000123 |
| CRISP1 | 3.584165 | -3.52165 | 6.97E-05 | 0.000123 |
| KRTDAP | 1.757921 | -1.24174 | 7.04E-05 | 0.000125 |
| CLCA1 | 2.933067 | -0.83711 | 7.05E-05 | 0.000125 |
| OTOP1 | 2.751531 | -3.90759 | 7.09E-05 | 0.000125 |
| OPN4 | 1.319135 | -3.38729 | 7.29E-05 | 0.000129 |
| SMIM23 | 1.36788 | -2.88953 | 7.34E-05 | 0.00013 |
| SRARP | 2.12779 | -2.15125 | 7.48E-05 | 0.000132 |
| MC2R | 2.040328 | -2.55084 | 7.54E-05 | 0.000133 |
| CTSE | 1.304139 | 8.495324 | 7.72E-05 | 0.000136 |
| GRIK1 | 1.17015 | -0.20952 | 7.73E-05 | 0.000136 |
| AC090517.4 | 1.957912 | -3.66767 | 7.84E-05 | 0.000138 |
| EPHA5 | 2.232069 | -0.05278 | 7.92E-05 | 0.00014 |
| EPO | 1.136412 | -3.00392 | 7.96E-05 | 0.00014 |
| SLC5A7 | -1.32248 | -0.61418 | 8.41E-05 | 0.000148 |
| DBX1 | 2.430969 | -3.86791 | 8.50E-05 | 0.000149 |
| CDH10 | -1.12265 | -1.50526 | 8.51E-05 | 0.00015 |
| GABRB1 | 2.290563 | -2.29941 | 8.51E-05 | 0.00015 |
| OR1Q1 | 1.780327 | -3.85071 | 8.53E-05 | 0.00015 |
| NPIPB8 | 1.378745 | -3.68506 | 8.58E-05 | 0.000151 |
| CCDC83 | 1.654009 | -3.78094 | 8.64E-05 | 0.000152 |
| DEFB4B | 2.682849 | -3.67894 | 8.67E-05 | 0.000152 |
| S100A9 | 1.194643 | 8.567447 | 9.03E-05 | 0.000158 |
| OR6A2 | 2.071068 | -3.39767 | 9.04E-05 | 0.000158 |
| FBLL1 | 1.480622 | -1.23982 | 9.06E-05 | 0.000159 |
| ST8SIA5 | 1.134407 | -1.25808 | 9.11E-05 | 0.00016 |
| MLNR | 1.188921 | -2.99632 | 9.12E-05 | 0.00016 |
| SAA4 | 1.570468 | -2.58485 | 9.20E-05 | 0.000161 |
| BTG4 | -1.03429 | -2.26702 | 9.46E-05 | 0.000166 |
| MTTP | 1.353472 | 0.870889 | 9.65E-05 | 0.000169 |
| OR52I1 | 1.58314 | -3.39432 | 9.79E-05 | 0.000171 |
| ITIH2 | 1.565349 | 2.897396 | 9.92E-05 | 0.000173 |
| KRT13 | 1.897188 | 2.871499 | 9.95E-05 | 0.000174 |
| GAL3ST3 | 1.772988 | -2.96106 | 9.96E-05 | 0.000174 |
| PRR20G | 2.64832 | -0.72692 | 9.99E-05 | 0.000174 |
| AZGP1 | 1.473276 | 6.811651 | 0.0001 | 0.000175 |
| NPIPB13 | 1.014784 | -1.89734 | 0.000104 | 0.000181 |
| APOBEC2 | 1.225018 | 0.24777 | 0.000104 | 0.000181 |
| CBLIF | 2.542377 | -2.63409 | 0.000108 | 0.000188 |
| CCDC201 | 1.885417 | -3.88389 | 0.000109 | 0.00019 |
| EZHIP | 2.223805 | -1.44503 | 0.000109 | 0.00019 |
| MPC1L | 2.554273 | -3.03712 | 0.000111 | 0.000193 |
| IL20 | -1.16489 | -3.22238 | 0.000112 | 0.000195 |
| DCHS2 | 1.144325 | 0.686073 | 0.000118 | 0.000204 |
| UTS2 | 1.134929 | -0.98392 | 0.000119 | 0.000207 |
| NLRP2 | 1.195852 | 4.840719 | 0.000119 | 0.000207 |
| GPR1 | 1.029465 | -0.0531 | 0.000122 | 0.000212 |
| RAD21L1 | 1.555904 | -3.07739 | 0.000123 | 0.000213 |
| PAQR9 | 2.745929 | -1.23808 | 0.000125 | 0.000216 |
| ZPBP | -1.01004 | -3.65067 | 0.000125 | 0.000216 |
| PABPC1L2A | 2.441883 | -3.82681 | 0.000127 | 0.000219 |
| OLIG2 | 1.430088 | -3.24237 | 0.000128 | 0.000221 |
| DEFA6 | 3.366812 | -2.60258 | 0.00013 | 0.000223 |
| GSTA5 | 1.347551 | -3.20116 | 0.00013 | 0.000224 |
| LEFTY1 | 1.310831 | -1.05312 | 0.000131 | 0.000226 |
| ZNF488 | 1.275958 | -0.10083 | 0.000134 | 0.000231 |
| APOL5 | 1.659209 | -3.49862 | 0.000135 | 0.000232 |
| OR52N2 | 1.523454 | -2.47228 | 0.000136 | 0.000233 |
| MIA | 1.379113 | -3.64393 | 0.000137 | 0.000236 |
| DCX | 1.856591 | -2.99143 | 0.000138 | 0.000237 |
| MEP1B | 1.547311 | -2.56242 | 0.000142 | 0.000243 |
| ZBTB20 | 1.195401 | 3.532567 | 0.000142 | 0.000243 |
| SIX3 | 1.696018 | -0.18578 | 0.000144 | 0.000246 |
| FXYD4 | 1.687914 | 1.847666 | 0.000144 | 0.000246 |
| MYH1 | -1.09712 | -1.31852 | 0.000145 | 0.000248 |
| MYH4 | 1.694319 | -3.10278 | 0.000148 | 0.000254 |
| KRT24 | 1.834081 | -1.88662 | 0.000149 | 0.000256 |
| LRP1B | 1.587348 | -0.43974 | 0.00015 | 0.000257 |
| MYH8 | 1.380614 | -3.16691 | 0.000152 | 0.00026 |
| KCNV2 | 1.116002 | -2.98146 | 0.000156 | 0.000266 |
| TMEM178B | 1.137501 | 2.273066 | 0.000156 | 0.000267 |
| NTNG2 | 1.09484 | 2.624257 | 0.000156 | 0.000267 |
| CCDC160 | 1.111985 | 0.85111 | 0.000161 | 0.000275 |
| QRFPR | -1.30518 | -2.57642 | 0.000163 | 0.000279 |
| RTP1 | 2.354862 | -2.33952 | 0.000167 | 0.000285 |
| LVRN | 1.219927 | -0.6622 | 0.000167 | 0.000285 |
| GSX2 | 1.73946 | -3.90066 | 0.000168 | 0.000286 |
| KRT5 | 1.808566 | 5.7932 | 0.000168 | 0.000286 |
| FSHB | 3.325872 | -3.72788 | 0.000169 | 0.000287 |
| SORCS3 | 1.749037 | -2.49959 | 0.000171 | 0.000292 |
| DGKB | 1.478257 | -0.74569 | 0.000175 | 0.000297 |
| LRRC3B | -1.0067 | -2.18488 | 0.000175 | 0.000298 |
| CACNG8 | 1.077296 | -0.37963 | 0.000176 | 0.000299 |
| EPGN | -1.14172 | 0.588823 | 0.000176 | 0.0003 |
| IHH | -1.15172 | 1.433616 | 0.000178 | 0.000303 |
| MARCHF4 | 1.362841 | 0.735154 | 0.00018 | 0.000305 |
| ASZ1 | 1.697669 | -1.24371 | 0.000181 | 0.000307 |
| SCGB1D2 | 2.815612 | -2.65903 | 0.000182 | 0.000309 |
| SERPINB3 | 2.112047 | 2.580028 | 0.000182 | 0.000309 |
| IZUMO2 | 1.678707 | -1.04302 | 0.000189 | 0.00032 |
| OR1N2 | 2.464892 | -3.75252 | 0.00019 | 0.000321 |
| OR8D1 | 2.316295 | -3.70189 | 0.000191 | 0.000324 |
| KRTAP5-7 | 1.078422 | -3.38341 | 0.000193 | 0.000327 |
| ASIC2 | 1.199693 | -1.3104 | 0.000199 | 0.000336 |
| SLITRK5 | 1.164531 | 1.693867 | 0.000199 | 0.000336 |
| RPL10L | 1.530349 | -3.11801 | 0.000201 | 0.000339 |
| NBPF19 | 1.510379 | -3.2482 | 0.000203 | 0.000343 |
| C10orf99 | 2.605453 | -2.54375 | 0.000206 | 0.000348 |
| OR51B2 | 2.286774 | -3.90975 | 0.000209 | 0.000353 |
| NPHS1 | 1.248033 | -0.66961 | 0.000214 | 0.00036 |
| KIAA1210 | 1.184088 | -1.9548 | 0.000216 | 0.000364 |
| SLC7A2 | 1.067643 | 7.046318 | 0.00022 | 0.00037 |
| VNN1 | 1.04415 | 3.29813 | 0.000221 | 0.000372 |
| PRAC1 | 2.863722 | -3.68838 | 0.000224 | 0.000376 |
| GRIA2 | 1.619029 | -1.13818 | 0.000225 | 0.000378 |
| GRP | -1.1031 | 1.750968 | 0.000225 | 0.000379 |
| LCE3D | 3.083071 | -3.34295 | 0.000233 | 0.000392 |
| ZNF676 | 1.395335 | -0.11801 | 0.000239 | 0.000402 |
| CYP2A6 | 1.730611 | 2.230045 | 0.00024 | 0.000403 |
| DEFB4A | 2.081341 | -1.13602 | 0.000247 | 0.000415 |
| ELAVL3 | 1.886833 | -1.16748 | 0.000249 | 0.000417 |
| ZNF99 | 1.412599 | -1.89982 | 0.00025 | 0.000418 |
| SI | 2.530945 | -3.45664 | 0.000258 | 0.000431 |
| SMR3B | 3.426451 | -3.19514 | 0.000258 | 0.000431 |
| CRYM | 1.073657 | 4.861531 | 0.000259 | 0.000434 |
| DOC2A | 1.037022 | 1.598277 | 0.000264 | 0.000442 |
| TCP11 | 1.34773 | 0.153617 | 0.000276 | 0.000461 |
| TAS2R3 | 1.659961 | -2.76822 | 0.000281 | 0.000468 |
| FOXR1 | 1.496568 | -3.90838 | 0.000288 | 0.00048 |
| FAM90A26 | 1.224202 | -3.90965 | 0.000291 | 0.000485 |
| TDRD15 | 1.70991 | -3.27861 | 0.000293 | 0.000488 |
| ASGR2 | 1.07492 | 1.202153 | 0.000299 | 0.000498 |
| NPPC | 1.356971 | -1.89218 | 0.000302 | 0.000501 |
| HMX1 | 2.29608 | -3.63791 | 0.000303 | 0.000504 |
| H3-4 | 1.03952 | -3.58132 | 0.000308 | 0.000513 |
| OTOP2 | 1.911583 | -2.97531 | 0.00031 | 0.000515 |
| ACP7 | 1.419317 | -1.16141 | 0.000313 | 0.000519 |
| LCN9 | 3.045508 | -3.13083 | 0.000315 | 0.000523 |
| SPRR2G | 2.86435 | -1.50454 | 0.000316 | 0.000524 |
| MSLN | 1.326788 | 9.058972 | 0.000316 | 0.000524 |
| NR1H4 | 1.801832 | -0.1963 | 0.000321 | 0.000531 |
| GP2 | 2.827027 | 2.859194 | 0.000323 | 0.000535 |
| SCN2A | 1.331017 | 1.277152 | 0.000326 | 0.00054 |
| CFHR2 | 2.420176 | -3.92845 | 0.000327 | 0.000542 |
| FEV | 1.998556 | -2.3593 | 0.000329 | 0.000544 |
| OR5AN1 | 2.314989 | -3.69076 | 0.000337 | 0.000557 |
| ZAN | 1.309567 | -3.29401 | 0.000339 | 0.000559 |
| LGALS7 | 1.755074 | -2.2102 | 0.00034 | 0.000561 |
| NOL4 | 1.493029 | 0.290799 | 0.000346 | 0.00057 |
| LRRC55 | 1.256095 | 1.358446 | 0.000351 | 0.000579 |
| LGALS9B | 1.360139 | -0.41986 | 0.000357 | 0.000588 |
| OR4E1 | 1.636981 | -3.86339 | 0.000358 | 0.00059 |
| KIAA0319 | 1.058434 | 3.071713 | 0.000362 | 0.000596 |
| CXCL6 | 1.23479 | 2.560183 | 0.000368 | 0.000605 |
| FST | 1.072219 | 3.60973 | 0.000368 | 0.000606 |
| MUCL3 | 1.691899 | 6.139253 | 0.000374 | 0.000615 |
| ARHGDIG | 1.181528 | -2.12721 | 0.000376 | 0.000618 |
| TECTB | 1.591691 | -3.6417 | 0.000386 | 0.000634 |
| MC3R | 2.594023 | -3.93873 | 0.000387 | 0.000636 |
| CACNG2 | 2.140242 | -3.23498 | 0.000389 | 0.000639 |
| MEPE | 1.476992 | -1.40285 | 0.00039 | 0.00064 |
| SMCO1 | 1.136624 | -3.86869 | 0.000392 | 0.000643 |
| POPDC3 | 1.369763 | 1.216466 | 0.000402 | 0.000659 |
| CAPN6 | 1.460633 | 3.454137 | 0.000405 | 0.000663 |
| AP000781.2 | 1.308858 | -3.61814 | 0.000407 | 0.000667 |
| GK3P | 1.253001 | -2.49239 | 0.000415 | 0.000679 |
| HTR1E | 2.270882 | -3.43034 | 0.000427 | 0.000698 |
| CDH4 | 1.061524 | 1.74932 | 0.000429 | 0.0007 |
| ALLC | 1.825456 | -3.63652 | 0.000433 | 0.000706 |
| AGXT | 1.86076 | -1.95624 | 0.000443 | 0.000722 |
| LMO1 | 1.177338 | -2.04071 | 0.000445 | 0.000725 |
| ZDHHC22 | 1.794103 | -1.93108 | 0.000448 | 0.000729 |
| SERTM2 | -1.00861 | -0.1201 | 0.000463 | 0.000752 |
| PLEKHS1 | 1.046484 | 4.909439 | 0.000464 | 0.000753 |
| TRHR | 1.290001 | -3.2507 | 0.000474 | 0.000768 |
| EPHA7 | 1.240163 | 1.252293 | 0.000476 | 0.000772 |
| RIMS1 | 1.15262 | 1.511014 | 0.000477 | 0.000773 |
| ALX4 | 1.238497 | -1.77267 | 0.000485 | 0.000785 |
| DNER | 1.163088 | 3.103366 | 0.000486 | 0.000787 |
| C14orf180 | -1.02284 | -3.12498 | 0.000491 | 0.000795 |
| GAD2 | 1.997439 | -3.91335 | 0.000494 | 0.0008 |
| SPATA31E1 | 1.507301 | -3.56704 | 0.000503 | 0.000813 |
| MORC1 | 2.097899 | -3.19151 | 0.000508 | 0.000821 |
| PANX3 | 1.825435 | -3.6 | 0.00051 | 0.000825 |
| TRIML2 | 1.844493 | -3.00703 | 0.000514 | 0.00083 |
| SLC6A5 | -1.68584 | -1.90921 | 0.000516 | 0.000833 |
| TP63 | 1.04953 | 4.031959 | 0.000517 | 0.000835 |
| FGF8 | 1.116183 | -2.38038 | 0.000523 | 0.000844 |
| SHCBP1L | 1.912742 | -3.74924 | 0.000535 | 0.000862 |
| TMEM238L | 2.110412 | -3.66616 | 0.000544 | 0.000876 |
| WFDC11 | 1.39398 | -3.45845 | 0.000577 | 0.000928 |
| PEX5L | 1.154875 | 0.583337 | 0.000577 | 0.000928 |
| SPDYE17 | 1.258546 | -3.0106 | 0.000582 | 0.000936 |
| TMED7-TICAM2 | 1.048502 | -3.81042 | 0.000589 | 0.000946 |
| PRR9 | -1.60116 | -3.19053 | 0.000595 | 0.000955 |
| F8A3 | 1.064641 | -3.02493 | 0.000597 | 0.000959 |
| FAM135B | 1.247707 | -0.92423 | 0.000603 | 0.000968 |
| C1orf94 | 1.947466 | -3.24915 | 0.000606 | 0.000972 |
| COX8C | 1.741738 | -2.51081 | 0.000615 | 0.000986 |
| TGM7 | 1.466982 | -3.84297 | 0.000621 | 0.000995 |
| SPRR2E | 2.734402 | -0.67753 | 0.000627 | 0.001003 |
| LGI1 | 1.984113 | -1.77968 | 0.000632 | 0.001012 |
| AFM | 1.571402 | -3.81169 | 0.000667 | 0.001065 |
| SPOCK3 | 1.321504 | 1.938021 | 0.00069 | 0.001099 |
| ZFP42 | 1.986677 | 1.270239 | 0.000706 | 0.001123 |
| OR5AU1 | 1.566477 | -3.79804 | 0.000711 | 0.001132 |
| VSX2 | 2.046841 | -1.64482 | 0.000735 | 0.001167 |
| C6orf58 | 1.13366 | -0.96528 | 0.000753 | 0.001194 |
| GABRA2 | 1.667119 | 0.168457 | 0.000777 | 0.00123 |
| SLC7A14 | 1.855431 | -1.57693 | 0.000779 | 0.001234 |
| OTOP3 | 1.760216 | -3.89563 | 0.000782 | 0.001238 |
| BTNL3 | -1.23121 | -1.74977 | 0.000788 | 0.001247 |
| SPINK9 | 1.09438 | -2.72837 | 0.000811 | 0.001281 |
| LCN1 | 1.230738 | -2.87448 | 0.000813 | 0.001283 |
| SERPINB10 | -1.05298 | -2.67219 | 0.000813 | 0.001284 |
| HYAL4 | 1.118992 | -2.43917 | 0.00083 | 0.001309 |
| FAM71C | 1.727402 | -3.85016 | 0.000835 | 0.001316 |
| HTR4 | 1.109299 | -1.97864 | 0.00085 | 0.00134 |
| C10orf82 | 1.651915 | -1.72967 | 0.000854 | 0.001345 |
| VWA5B2 | 1.048269 | 0.400225 | 0.000864 | 0.00136 |
| AK5 | 1.03614 | -0.20272 | 0.000894 | 0.001405 |
| AKR1C8P | 1.374618 | -2.63196 | 0.000925 | 0.001452 |
| NMUR2 | -1.01666 | -1.35611 | 0.000926 | 0.001454 |
| SNTG1 | 1.894036 | -3.24748 | 0.000938 | 0.001472 |
| TMIGD1 | 2.18845 | -3.55433 | 0.000946 | 0.001483 |
| SULT2A1 | 1.946947 | -3.47796 | 0.000951 | 0.00149 |
| DCDC2C | -1.04331 | -3.56801 | 0.000965 | 0.001512 |
| MYO3A | 1.174092 | 0.044843 | 0.000992 | 0.001553 |
| TMEM211 | 1.092502 | -2.4245 | 0.001036 | 0.001618 |
| CEACAM16 | 1.15825 | -2.57488 | 0.001046 | 0.001633 |
| PNMA6E | 2.411703 | -0.34726 | 0.001051 | 0.001639 |
| SLC6A2 | 1.855806 | -0.63022 | 0.001124 | 0.001749 |
| CYP4F2 | 1.685338 | -3.10152 | 0.001149 | 0.001786 |
| ADAM20 | 1.165909 | -1.96961 | 0.001153 | 0.001791 |
| KPRP | 2.637133 | -3.32503 | 0.001172 | 0.001819 |
| CBLN2 | 1.541933 | -1.35873 | 0.001173 | 0.001821 |
| NFILZ | 1.580957 | -3.36313 | 0.001186 | 0.00184 |
| CDH22 | 1.491055 | -0.59381 | 0.0012 | 0.001861 |
| FOXL3 | 2.292344 | -2.63932 | 0.001204 | 0.001866 |
| ODF3 | 1.534106 | -3.41867 | 0.00123 | 0.001905 |
| PBOV1 | 1.563124 | -1.97201 | 0.001273 | 0.001969 |
| LYPD8 | 1.396487 | -3.68616 | 0.001298 | 0.002007 |
| ANKRD30B | 1.596149 | -3.45761 | 0.00131 | 0.002023 |
| DAPL1 | 1.216212 | -0.12896 | 0.001346 | 0.002075 |
| LY6G6C | 1.239116 | -1.39736 | 0.001398 | 0.002153 |
| TSNAX-DISC1 | 1.040875 | -3.83544 | 0.001399 | 0.002155 |
| AF196969.1 | 1.045793 | -3.65781 | 0.001429 | 0.002198 |
| KCNB2 | 1.399203 | -1.03968 | 0.001445 | 0.002223 |
| FAM3D | 1.141661 | 2.08253 | 0.001449 | 0.002229 |
| OR3A2 | 1.197176 | -2.67873 | 0.00148 | 0.002274 |
| TBC1D3E | 1.353433 | -2.92136 | 0.001494 | 0.002294 |
| HS3ST5 | 1.149661 | 1.153658 | 0.001495 | 0.002295 |
| EFCAB3 | 1.633188 | -3.93883 | 0.001508 | 0.002314 |
| PIRT | 2.059416 | -2.54028 | 0.001547 | 0.00237 |
| OR10A2 | 1.267109 | -2.88332 | 0.00159 | 0.002433 |
| DIRAS2 | 1.068361 | -0.58773 | 0.001594 | 0.002439 |
| KCNJ9 | 1.026148 | -3.23539 | 0.001596 | 0.002442 |
| NOTUM | 1.203924 | 4.119435 | 0.001607 | 0.002458 |
| ZNF98 | 1.358028 | -1.62157 | 0.00171 | 0.002608 |
| TAS2R43 | 1.428923 | -2.86941 | 0.001754 | 0.002673 |
| GUCA2A | -1.07806 | -1.29462 | 0.001766 | 0.002688 |
| GMNC | 1.820783 | -0.10561 | 0.001814 | 0.002758 |
| VSTM2B | 2.207665 | -3.82176 | 0.001848 | 0.002807 |
| PGC | 1.625321 | 10.65754 | 0.001897 | 0.002879 |
| LEP | -1.02519 | 0.038192 | 0.001937 | 0.002937 |
| FGG | 1.366454 | 8.996937 | 0.001938 | 0.002938 |
| CTAGE15 | 1.045376 | -1.89485 | 0.001956 | 0.002964 |
| CPNE6 | 1.148443 | -2.42356 | 0.002002 | 0.00303 |
| ZSCAN4 | 1.088016 | -0.9463 | 0.002059 | 0.003112 |
| BRINP1 | 1.258406 | 3.178554 | 0.002092 | 0.003159 |
| ATP2B2 | 1.046247 | -1.16304 | 0.002146 | 0.003236 |
| OR51B4 | 1.582683 | -3.18434 | 0.002224 | 0.003349 |
| OBP2B | 1.505026 | -3.53937 | 0.002354 | 0.003536 |
| SLC17A1 | 1.55033 | -2.71094 | 0.002473 | 0.003708 |
| KCNK16 | 1.422177 | -2.18537 | 0.002487 | 0.003728 |
| DSC3 | 1.242874 | 2.665717 | 0.002509 | 0.003757 |
| ATRNL1 | 1.045939 | -0.27509 | 0.002552 | 0.003818 |
| MSMB | 1.544008 | 5.97104 | 0.002691 | 0.004017 |
| CBSL | 1.084702 | -0.61106 | 0.002768 | 0.004125 |
| ETDC | 1.31748 | -3.84794 | 0.002822 | 0.004201 |
| TRIM29 | 1.055634 | 5.415112 | 0.002867 | 0.004264 |
| UGT2B7 | 1.162607 | 0.514893 | 0.002901 | 0.004312 |
| OR8A1 | 1.860766 | -3.60713 | 0.002933 | 0.004359 |
| FAM205C | 2.013539 | -3.40506 | 0.002969 | 0.004409 |
| PROKR2 | 1.182131 | -3.49387 | 0.003013 | 0.004472 |
| KLK4 | 1.052332 | -1.53455 | 0.003044 | 0.004514 |
| ABCC12 | 1.074797 | -1.78278 | 0.00308 | 0.004565 |
| DRD2 | 1.114583 | -0.59827 | 0.003122 | 0.004624 |
| SCGB2A1 | 1.210916 | 1.990075 | 0.003146 | 0.004656 |
| A4GNT | 1.210052 | -0.82878 | 0.003164 | 0.004681 |
| TCP10L2 | 1.126275 | -3.68828 | 0.003259 | 0.004816 |
| COX6A2 | 1.498843 | -3.82203 | 0.003393 | 0.005005 |
| AMELX | 1.933759 | -3.71005 | 0.003404 | 0.00502 |
| UGT2A1 | 1.849069 | -2.16674 | 0.003472 | 0.005114 |
| OR51M1 | 1.517909 | -3.7651 | 0.00364 | 0.005349 |
| CER1 | 1.574463 | -3.63892 | 0.003698 | 0.005432 |
| CCDC197 | 1.19564 | -3.89607 | 0.003787 | 0.005553 |
| CYP2A13 | -1.00483 | -1.39417 | 0.003902 | 0.005715 |
| WFDC8 | 1.216329 | -3.6788 | 0.003914 | 0.005731 |
| CHGA | 1.621606 | 2.918851 | 0.00399 | 0.005837 |
| GUCA2B | 1.960836 | -0.75244 | 0.004153 | 0.006066 |
| TFDP3 | 1.419903 | -3.79947 | 0.004202 | 0.006134 |
| CLEC18C | 1.190208 | -3.66311 | 0.004481 | 0.006524 |
| BEST2 | 1.059211 | -3.49649 | 0.004506 | 0.006559 |
| HMX3 | 1.698696 | -2.48851 | 0.004511 | 0.006566 |
| LCN8 | 1.466418 | -2.83864 | 0.004525 | 0.006584 |
| TKTL1 | 1.487296 | 1.700819 | 0.004542 | 0.006608 |
| RIPPLY2 | 1.632377 | -3.42432 | 0.004823 | 0.007001 |
| GNAT1 | 1.328832 | -3.32809 | 0.00486 | 0.00705 |
| TBC1D3D | 1.642937 | -3.0648 | 0.005268 | 0.007604 |
| AL603764.2 | 1.162804 | -2.67221 | 0.005805 | 0.008348 |
| SPINK6 | 1.014161 | -2.30546 | 0.005954 | 0.00855 |
| MPPED1 | 1.08068 | -3.12414 | 0.00616 | 0.008824 |
| MAB21L2 | 1.733425 | -2.54307 | 0.006295 | 0.00901 |
| KRT77 | 1.741747 | -3.59558 | 0.006346 | 0.009079 |
| OR52I2 | 1.094147 | -3.37248 | 0.006369 | 0.00911 |
| SLC6A19 | 1.575893 | -2.23411 | 0.006419 | 0.009179 |
| PAGE4 | 1.779596 | -2.60718 | 0.006496 | 0.009284 |
| RGSL1 | 1.089453 | -3.83895 | 0.006563 | 0.009376 |
| KIR3DL3 | 1.415731 | -3.79092 | 0.006661 | 0.009507 |
| KCTD8 | 1.361066 | -1.4799 | 0.006662 | 0.009507 |
| RBP3 | 1.53458 | -2.95728 | 0.006834 | 0.009745 |
| C4orf45 | 1.016152 | -2.58432 | 0.006834 | 0.009745 |
| AMY1B | 1.06818 | -2.02926 | 0.006992 | 0.009957 |
